# Supplementary material for: Cross-population metabolome-wide Mendelian randomization study of prostate cancer risk
Source: Research Square preprint supplement (doi:10.21203/rs.3.rs-9708129/v1), 2026-05-31
Supplement: Supplementary file 1 [file 0f7cf7905b216fe7d0994242.xlsx]

## Sheet: ST1
	Supplementary Table 1: Population-specific and cross-population MR results between metabolites and prosate cancer risk. IVW random and Wald ratio results are considered the primary results. Wald ratio's calculated when NSNP=1. Padj represents an FDR adjusted P-value. Cross-population MR results were obtained from fixed effect meta-analyses of primary MR results. "-" indicates when a metabolite in…
											AFRICAN (AFR)				EUROPEAN (EUR)				HISPANIC (HIS)				CROSS-POPULATION META ANALYSIS
	Metabolite	COMP.ID	HMDB	PubChem	KEGG	SMILES	SUPER PATHWAY	SUB PATHWAY	Analyses	Method	NSNP	OR (95% CI)	P.value	Padj	NSNP	OR (95% CI)	P.value	Padj	NSNP	OR (95% CI)	P.value	Padj	Npop	OR (95% CI)	P.value	Padj	I2	Q-test P-value
	1,2,3-benzenetriol sulfate (2)	48762	-	-	-	-	Xenobiotics	Chemical	Primary	Inverse variance weighted (random effects)/ Wald ratio	-	-	-	-	-	-	-	-	1	1.07 (0.52-2.21)	0.844721	0.997496	-	-	-	-	-	-
	1,2-dilinoleoyl-GPC (18:2/18:2)	52603	HMDB08138	5288075	C00157	CCCCC\C=C/C\C=C/CCCCCCCC(=O)OC[C@]([H])(COP([O-])(=O)OCC[N+](C)(C)C)OC(=O)CCCCCCC\C=C/C\C=C/CCCCC	Lipids	Phosphatidylcholine (PC)	Primary	Inverse variance weighted (random effects)/ Wald ratio	-	-	-	-	-	-	-	-	19	0.88 (0.81-0.96)	0.00251482	0.0429254	-	-	-	-	-	-
	1,2-dilinoleoyl-GPC (18:2/18:2)	52603	HMDB08138	5288075	C00157	CCCCC\C=C/C\C=C/CCCCCCCC(=O)OC[C@]([H])(COP([O-])(=O)OCC[N+](C)(C)C)OC(=O)CCCCCCC\C=C/C\C=C/CCCCC	Lipids	Phosphatidylcholine (PC)	Sensitivity	Inverse variance weighted (fixed effects)	-	-	-	-	-	-	-	-	19	0.88 (0.81-0.96)	0.00251482	-	-	-	-	-	-	-
	1,2-dilinoleoyl-GPC (18:2/18:2)	52603	HMDB08138	5288075	C00157	CCCCC\C=C/C\C=C/CCCCCCCC(=O)OC[C@]([H])(COP([O-])(=O)OCC[N+](C)(C)C)OC(=O)CCCCCCC\C=C/C\C=C/CCCCC	Lipids	Phosphatidylcholine (PC)	Sensitivity	Inverse variance weighted (multiplicative random effects)	-	-	-	-	-	-	-	-	19	0.88 (0.83-0.94)	0.000181038	-	-	-	-	-	-	-
	1,2-dilinoleoyl-GPC (18:2/18:2)	52603	HMDB08138	5288075	C00157	CCCCC\C=C/C\C=C/CCCCCCCC(=O)OC[C@]([H])(COP([O-])(=O)OCC[N+](C)(C)C)OC(=O)CCCCCCC\C=C/C\C=C/CCCCC	Lipids	Phosphatidylcholine (PC)	Sensitivity	MR Egger	-	-	-	-	-	-	-	-	19	0.85 (0.62-1.17)	0.331907	-	-	-	-	-	-	-
	1,2-dilinoleoyl-GPC (18:2/18:2)	52603	HMDB08138	5288075	C00157	CCCCC\C=C/C\C=C/CCCCCCCC(=O)OC[C@]([H])(COP([O-])(=O)OCC[N+](C)(C)C)OC(=O)CCCCCCC\C=C/C\C=C/CCCCC	Lipids	Phosphatidylcholine (PC)	Sensitivity	Weighted median	-	-	-	-	-	-	-	-	19	0.88 (0.79-0.99)	0.0292969	-	-	-	-	-	-	-
	1,2-dilinoleoyl-GPC (18:2/18:2)	52603	HMDB08138	5288075	C00157	CCCCC\C=C/C\C=C/CCCCCCCC(=O)OC[C@]([H])(COP([O-])(=O)OCC[N+](C)(C)C)OC(=O)CCCCCCC\C=C/C\C=C/CCCCC	Lipids	Phosphatidylcholine (PC)	Sensitivity	Weighted mode	-	-	-	-	-	-	-	-	19	0.88 (0.77-1)	0.0735714	-	-	-	-	-	-	-
	1,2-dilinoleoyl-GPE-(18:2/18:2)	-	-	-	-	-	Lipids	Phosphatidylethanolamine (PE)	Primary	Inverse variance weighted (random effects)/ Wald ratio	-	-	-	-	-	-	-	-	8	0.92 (0.83-1.01)	0.064325	0.365987	-	-	-	-	-	-
	1,2-dilinoleoyl-GPE-(18:2/18:2)	-	-	-	-	-	Lipids	Phosphatidylethanolamine (PE)	Sensitivity	Inverse variance weighted (fixed effects)	-	-	-	-	-	-	-	-	8	0.92 (0.83-1.01)	0.064325	-	-	-	-	-	-	-
	1,2-dilinoleoyl-GPE-(18:2/18:2)	-	-	-	-	-	Lipids	Phosphatidylethanolamine (PE)	Sensitivity	Inverse variance weighted (multiplicative random effects)	-	-	-	-	-	-	-	-	8	0.92 (0.86-0.98)	0.00651693	-	-	-	-	-	-	-
	1,2-dilinoleoyl-GPE-(18:2/18:2)	-	-	-	-	-	Lipids	Phosphatidylethanolamine (PE)	Sensitivity	MR Egger	-	-	-	-	-	-	-	-	8	0.76 (0.48-1.2)	0.284842	-	-	-	-	-	-	-
	1,2-dilinoleoyl-GPE-(18:2/18:2)	-	-	-	-	-	Lipids	Phosphatidylethanolamine (PE)	Sensitivity	Weighted median	-	-	-	-	-	-	-	-	8	0.88 (0.78-0.98)	0.0262905	-	-	-	-	-	-	-
	1,2-dilinoleoyl-GPE-(18:2/18:2)	-	-	-	-	-	Lipids	Phosphatidylethanolamine (PE)	Sensitivity	Weighted mode	-	-	-	-	-	-	-	-	8	0.86 (0.73-1.02)	0.12965	-	-	-	-	-	-	-
	1,2-dipalmitoyl-GPC (16:0/16:0)	19130	HMDB00564	452110	D03585	[H][C@@](COC(=O)CCCCCCCCCCCCCCC)(COP([O-])(=O)OCC[N+](C)(C)C)OC(=O)CCCCCCCCCCCCCCC	Lipids	Phosphatidylcholine (PC)	Primary	Inverse variance weighted (random effects)/ Wald ratio	-	-	-	-	-	-	-	-	2	1.23 (0.93-1.62)	0.139287	0.60228	-	-	-	-	-	-
	1,2-dipalmitoyl-GPC (16:0/16:0)	19130	HMDB00564	452110	D03585	[H][C@@](COC(=O)CCCCCCCCCCCCCCC)(COP([O-])(=O)OCC[N+](C)(C)C)OC(=O)CCCCCCCCCCCCCCC	Lipids	Phosphatidylcholine (PC)	Sensitivity	Inverse variance weighted (fixed effects)	-	-	-	-	-	-	-	-	2	1.23 (0.95-1.59)	0.110747	-	-	-	-	-	-	-
	1,2-dipalmitoyl-GPC (16:0/16:0)	19130	HMDB00564	452110	D03585	[H][C@@](COC(=O)CCCCCCCCCCCCCCC)(COP([O-])(=O)OCC[N+](C)(C)C)OC(=O)CCCCCCCCCCCCCCC	Lipids	Phosphatidylcholine (PC)	Sensitivity	Inverse variance weighted (multiplicative random effects)	-	-	-	-	-	-	-	-	2	1.23 (0.93-1.62)	0.139287	-	-	-	-	-	-	-
	1,3-dimethylurate	32391	HMDB01857	70346	-	CN1C2=C(NC(=O)N2)C(=O)N(C)C1=O	Xenobiotics	Xanthine Metabolism	Primary	Inverse variance weighted (random effects)/ Wald ratio	-	-	-	-	-	-	-	-	1	1.2 (0.8-1.81)	0.371757	0.963454	-	-	-	-	-	-
	1,5-anhydroglucitol (1,5-AG)	20675	HMDB02712	64960	C07326	OC[C@H]1OC[C@H](O)[C@@H](O)[C@@H]1O	Carbohydrates	Glycolysis, Gluconeogenesis, and Pyruvate Metabolism	Primary	Inverse variance weighted (random effects)/ Wald ratio	1	1.04 (0.9-1.2)	0.627987	0.878415	-	-	-	-	7	0.97 (0.82-1.15)	0.742591	0.994872	2	1.01 (0.9-1.13)	0.875116	0.939606	0	0.572842
	1,5-anhydroglucitol (1,5-AG)	20675	HMDB02712	64960	C07326	OC[C@H]1OC[C@H](O)[C@@H](O)[C@@H]1O	Carbohydrates	Glycolysis, Gluconeogenesis, and Pyruvate Metabolism	Sensitivity	Inverse variance weighted (fixed effects)	-	-	-	-	-	-	-	-	7	0.97 (0.82-1.15)	0.742591	-	-	-	-	-	-	-
	1,5-anhydroglucitol (1,5-AG)	20675	HMDB02712	64960	C07326	OC[C@H]1OC[C@H](O)[C@@H](O)[C@@H]1O	Carbohydrates	Glycolysis, Gluconeogenesis, and Pyruvate Metabolism	Sensitivity	Inverse variance weighted (multiplicative random effects)	-	-	-	-	-	-	-	-	7	0.97 (0.85-1.11)	0.669581	-	-	-	-	-	-	-
	1,5-anhydroglucitol (1,5-AG)	20675	HMDB02712	64960	C07326	OC[C@H]1OC[C@H](O)[C@@H](O)[C@@H]1O	Carbohydrates	Glycolysis, Gluconeogenesis, and Pyruvate Metabolism	Sensitivity	MR Egger	-	-	-	-	-	-	-	-	7	0.75 (0.45-1.23)	0.303368	-	-	-	-	-	-	-
	1,5-anhydroglucitol (1,5-AG)	20675	HMDB02712	64960	C07326	OC[C@H]1OC[C@H](O)[C@@H](O)[C@@H]1O	Carbohydrates	Glycolysis, Gluconeogenesis, and Pyruvate Metabolism	Sensitivity	Weighted median	-	-	-	-	-	-	-	-	7	0.94 (0.76-1.17)	0.565425	-	-	-	-	-	-	-
	1,5-anhydroglucitol (1,5-AG)	20675	HMDB02712	64960	C07326	OC[C@H]1OC[C@H](O)[C@@H](O)[C@@H]1O	Carbohydrates	Glycolysis, Gluconeogenesis, and Pyruvate Metabolism	Sensitivity	Weighted mode	-	-	-	-	-	-	-	-	7	0.94 (0.73-1.2)	0.639535	-	-	-	-	-	-	-
	1-(1-enyl-palmitoyl)-2-arachidonoyl-GPC (P-16:0/20:4)*	52689	HMDB11220	24779388	-	CCCCCCCCCCCCCC\C=C/OC[C@]([H])(COP([O-])(=O)OCC[N+](C)(C)C)OC(=O)CCC\C=C/C\C=C/C\C=C/C\C=C/CCCCC	Lipids	Plasmalogen	Primary	Inverse variance weighted (random effects)/ Wald ratio	-	-	-	-	-	-	-	-	122	1.17 (1.14-1.21)	4.71184e-24	5.83e-22	-	-	-	-	-	-
	1-(1-enyl-palmitoyl)-2-arachidonoyl-GPC (P-16:0/20:4)*	52689	HMDB11220	24779388	-	CCCCCCCCCCCCCC\C=C/OC[C@]([H])(COP([O-])(=O)OCC[N+](C)(C)C)OC(=O)CCC\C=C/C\C=C/C\C=C/C\C=C/CCCCC	Lipids	Plasmalogen	Sensitivity	Inverse variance weighted (fixed effects)	-	-	-	-	-	-	-	-	122	1.17 (1.14-1.21)	5.44443e-27	-	-	-	-	-	-	-
	1-(1-enyl-palmitoyl)-2-arachidonoyl-GPC (P-16:0/20:4)*	52689	HMDB11220	24779388	-	CCCCCCCCCCCCCC\C=C/OC[C@]([H])(COP([O-])(=O)OCC[N+](C)(C)C)OC(=O)CCC\C=C/C\C=C/C\C=C/C\C=C/CCCCC	Lipids	Plasmalogen	Sensitivity	Inverse variance weighted (multiplicative random effects)	-	-	-	-	-	-	-	-	122	1.17 (1.14-1.21)	4.71184e-24	-	-	-	-	-	-	-
	1-(1-enyl-palmitoyl)-2-arachidonoyl-GPC (P-16:0/20:4)*	52689	HMDB11220	24779388	-	CCCCCCCCCCCCCC\C=C/OC[C@]([H])(COP([O-])(=O)OCC[N+](C)(C)C)OC(=O)CCC\C=C/C\C=C/C\C=C/C\C=C/CCCCC	Lipids	Plasmalogen	Sensitivity	MR Egger	-	-	-	-	-	-	-	-	122	1.02 (0.93-1.11)	0.692747	-	-	-	-	-	-	-
	1-(1-enyl-palmitoyl)-2-arachidonoyl-GPC (P-16:0/20:4)*	52689	HMDB11220	24779388	-	CCCCCCCCCCCCCC\C=C/OC[C@]([H])(COP([O-])(=O)OCC[N+](C)(C)C)OC(=O)CCC\C=C/C\C=C/C\C=C/C\C=C/CCCCC	Lipids	Plasmalogen	Sensitivity	Weighted median	-	-	-	-	-	-	-	-	122	1.12 (1.06-1.17)	5.54678e-06	-	-	-	-	-	-	-
	1-(1-enyl-palmitoyl)-2-arachidonoyl-GPC (P-16:0/20:4)*	52689	HMDB11220	24779388	-	CCCCCCCCCCCCCC\C=C/OC[C@]([H])(COP([O-])(=O)OCC[N+](C)(C)C)OC(=O)CCC\C=C/C\C=C/C\C=C/C\C=C/CCCCC	Lipids	Plasmalogen	Sensitivity	Weighted mode	-	-	-	-	-	-	-	-	122	1.09 (1.02-1.16)	0.0109984	-	-	-	-	-	-	-
	1-(1-enyl-palmitoyl)-2-arachidonoyl-GPE-(P-16:0/20:4)*	52673	HMDB11352	52925126		[H][C@@](CO\C=C/CCCCCCCCCCCCCC)(COP(O)(=O)OCCN)OC(=O)CCC\C=C/C\C=C/C\C=C/C\C=C/CCCCC	Lipids	Plasmalogen	Primary	Inverse variance weighted (random effects)/ Wald ratio	-	-	-	-	-	-	-	-	3	1.07 (0.82-1.41)	0.617599	0.994872	-	-	-	-	-	-
	1-(1-enyl-palmitoyl)-2-arachidonoyl-GPE-(P-16:0/20:4)*	52673	HMDB11352	52925126		[H][C@@](CO\C=C/CCCCCCCCCCCCCC)(COP(O)(=O)OCCN)OC(=O)CCC\C=C/C\C=C/C\C=C/C\C=C/CCCCC	Lipids	Plasmalogen	Sensitivity	Inverse variance weighted (fixed effects)	-	-	-	-	-	-	-	-	3	1.07 (0.85-1.34)	0.548901	-	-	-	-	-	-	-
	1-(1-enyl-palmitoyl)-2-arachidonoyl-GPE-(P-16:0/20:4)*	52673	HMDB11352	52925126		[H][C@@](CO\C=C/CCCCCCCCCCCCCC)(COP(O)(=O)OCCN)OC(=O)CCC\C=C/C\C=C/C\C=C/C\C=C/CCCCC	Lipids	Plasmalogen	Sensitivity	Inverse variance weighted (multiplicative random effects)	-	-	-	-	-	-	-	-	3	1.07 (0.82-1.41)	0.617599	-	-	-	-	-	-	-
	1-(1-enyl-palmitoyl)-2-arachidonoyl-GPE-(P-16:0/20:4)*	52673	HMDB11352	52925126		[H][C@@](CO\C=C/CCCCCCCCCCCCCC)(COP(O)(=O)OCCN)OC(=O)CCC\C=C/C\C=C/C\C=C/C\C=C/CCCCC	Lipids	Plasmalogen	Sensitivity	MR Egger	-	-	-	-	-	-	-	-	3	1.32 (0.15-11.55)	0.844183	-	-	-	-	-	-	-
	1-(1-enyl-palmitoyl)-2-arachidonoyl-GPE-(P-16:0/20:4)*	52673	HMDB11352	52925126		[H][C@@](CO\C=C/CCCCCCCCCCCCCC)(COP(O)(=O)OCCN)OC(=O)CCC\C=C/C\C=C/C\C=C/C\C=C/CCCCC	Lipids	Plasmalogen	Sensitivity	Weighted median	-	-	-	-	-	-	-	-	3	1.08 (0.82-1.41)	0.589424	-	-	-	-	-	-	-
	1-(1-enyl-palmitoyl)-2-arachidonoyl-GPE-(P-16:0/20:4)*	52673	HMDB11352	52925126		[H][C@@](CO\C=C/CCCCCCCCCCCCCC)(COP(O)(=O)OCCN)OC(=O)CCC\C=C/C\C=C/C\C=C/C\C=C/CCCCC	Lipids	Plasmalogen	Sensitivity	Weighted mode	-	-	-	-	-	-	-	-	3	1.08 (0.78-1.49)	0.687571	-	-	-	-	-	-	-
	1-(1-enyl-palmitoyl)-2-linoleoyl-GPC (P-16:0/18:2)*	52682	HMDB11211	24779386	-	CCCCCCCCCCCCCC\C=C/OC[C@]([H])(COP([O-])(=O)OCC[N+](C)(C)C)OC(=O)CCCCCCC\C=C/C\C=C/CCCCC	Lipids	Plasmalogen	Primary	Inverse variance weighted (random effects)/ Wald ratio	-	-	-	-	-	-	-	-	1	0.71 (0.45-1.12)	0.139924	0.60228	-	-	-	-	-	-
	1-(1-enyl-palmitoyl)-2-linoleoyl-GPE (P-16:0/18:2)*	52677	HMDB11343	52925127	-	[H][C@@](CO\C=C/CCCCCCCCCCCCCC)(COP(O)(=O)OCCN)OC(=O)CCCCCCC\C=C/C\C=C/CCCCC	Lipids	Plasmalogen	Primary	Inverse variance weighted (random effects)/ Wald ratio	-	-	-	-	-	-	-	-	2	0.83 (0.65-1.07)	0.153405	0.6257	-	-	-	-	-	-
	1-(1-enyl-palmitoyl)-2-linoleoyl-GPE (P-16:0/18:2)*	52677	HMDB11343	52925127	-	[H][C@@](CO\C=C/CCCCCCCCCCCCCC)(COP(O)(=O)OCCN)OC(=O)CCCCCCC\C=C/C\C=C/CCCCC	Lipids	Plasmalogen	Sensitivity	Inverse variance weighted (fixed effects)	-	-	-	-	-	-	-	-	2	0.83 (0.65-1.07)	0.153405	-	-	-	-	-	-	-
	1-(1-enyl-palmitoyl)-2-linoleoyl-GPE (P-16:0/18:2)*	52677	HMDB11343	52925127	-	[H][C@@](CO\C=C/CCCCCCCCCCCCCC)(COP(O)(=O)OCCN)OC(=O)CCCCCCC\C=C/C\C=C/CCCCC	Lipids	Plasmalogen	Sensitivity	Inverse variance weighted (multiplicative random effects)	-	-	-	-	-	-	-	-	2	0.83 (0.65-1.07)	0.150034	-	-	-	-	-	-	-
	1-(1-enyl-palmitoyl)-2-oleoyl-GPC (P-16:0/18:1)*	52478	-	-	-	-	Lipids	Plasmalogen	Primary	Inverse variance weighted (random effects)/ Wald ratio	-	-	-	-	-	-	-	-	4	1.05 (0.87-1.27)	0.606365	0.994872	-	-	-	-	-	-
	1-(1-enyl-palmitoyl)-2-oleoyl-GPC (P-16:0/18:1)*	52478	-	-	-	-	Lipids	Plasmalogen	Sensitivity	Inverse variance weighted (fixed effects)	-	-	-	-	-	-	-	-	4	1.05 (0.88-1.25)	0.582827	-	-	-	-	-	-	-
	1-(1-enyl-palmitoyl)-2-oleoyl-GPC (P-16:0/18:1)*	52478	-	-	-	-	Lipids	Plasmalogen	Sensitivity	Inverse variance weighted (multiplicative random effects)	-	-	-	-	-	-	-	-	4	1.05 (0.87-1.27)	0.606365	-	-	-	-	-	-	-
	1-(1-enyl-palmitoyl)-2-oleoyl-GPC (P-16:0/18:1)*	52478	-	-	-	-	Lipids	Plasmalogen	Sensitivity	MR Egger	-	-	-	-	-	-	-	-	4	2.19 (0.83-5.76)	0.253379	-	-	-	-	-	-	-
	1-(1-enyl-palmitoyl)-2-oleoyl-GPC (P-16:0/18:1)*	52478	-	-	-	-	Lipids	Plasmalogen	Sensitivity	Weighted median	-	-	-	-	-	-	-	-	4	1 (0.8-1.25)	0.999639	-	-	-	-	-	-	-
	1-(1-enyl-palmitoyl)-2-oleoyl-GPC (P-16:0/18:1)*	52478	-	-	-	-	Lipids	Plasmalogen	Sensitivity	Weighted mode	-	-	-	-	-	-	-	-	4	0.94 (0.67-1.31)	0.739364	-	-	-	-	-	-	-
	1-(1-enyl-palmitoyl)-2-oleoyl-GPE (P-16:0/18:1)*	52477	HMDB11342	52925128	-	[H][C@@](CO\C=C/CCCCCCCCCCCCCC)(COP(O)(=O)OCCN)OC(=O)CCCCCCC\C=C/CCCCCCCC	Lipids	Plasmalogen	Primary	Inverse variance weighted (random effects)/ Wald ratio	-	-	-	-	-	-	-	-	1	1.01 (0.65-1.54)	0.97966	0.999026	-	-	-	-	-	-
	1-(1-enyl-palmitoyl)-2-palmitoleoyl-GPC (P-16:0/16:1)*	52713	HMDB11207	52923882	-	CCCCCCCCCCCCCC\C=C/OC[C@]([H])(COP([O-])(=O)OCC[N+](C)(C)C)OC(=O)CCCCCCC\C=C/CCCCCC	Lipids	Plasmalogen	Primary	Inverse variance weighted (random effects)/ Wald ratio	-	-	-	-	-	-	-	-	6	0.99 (0.89-1.1)	0.820043	0.994872	-	-	-	-	-	-
	1-(1-enyl-palmitoyl)-2-palmitoleoyl-GPC (P-16:0/16:1)*	52713	HMDB11207	52923882	-	CCCCCCCCCCCCCC\C=C/OC[C@]([H])(COP([O-])(=O)OCC[N+](C)(C)C)OC(=O)CCCCCCC\C=C/CCCCCC	Lipids	Plasmalogen	Sensitivity	Inverse variance weighted (fixed effects)	-	-	-	-	-	-	-	-	6	0.99 (0.89-1.1)	0.820043	-	-	-	-	-	-	-
	1-(1-enyl-palmitoyl)-2-palmitoleoyl-GPC (P-16:0/16:1)*	52713	HMDB11207	52923882	-	CCCCCCCCCCCCCC\C=C/OC[C@]([H])(COP([O-])(=O)OCC[N+](C)(C)C)OC(=O)CCCCCCC\C=C/CCCCCC	Lipids	Plasmalogen	Sensitivity	Inverse variance weighted (multiplicative random effects)	-	-	-	-	-	-	-	-	6	0.99 (0.89-1.09)	0.808793	-	-	-	-	-	-	-
	1-(1-enyl-palmitoyl)-2-palmitoleoyl-GPC (P-16:0/16:1)*	52713	HMDB11207	52923882	-	CCCCCCCCCCCCCC\C=C/OC[C@]([H])(COP([O-])(=O)OCC[N+](C)(C)C)OC(=O)CCCCCCC\C=C/CCCCCC	Lipids	Plasmalogen	Sensitivity	MR Egger	-	-	-	-	-	-	-	-	6	0.91 (0.7-1.18)	0.502363	-	-	-	-	-	-	-
	1-(1-enyl-palmitoyl)-2-palmitoleoyl-GPC (P-16:0/16:1)*	52713	HMDB11207	52923882	-	CCCCCCCCCCCCCC\C=C/OC[C@]([H])(COP([O-])(=O)OCC[N+](C)(C)C)OC(=O)CCCCCCC\C=C/CCCCCC	Lipids	Plasmalogen	Sensitivity	Weighted median	-	-	-	-	-	-	-	-	6	0.99 (0.87-1.12)	0.845105	-	-	-	-	-	-	-
	1-(1-enyl-palmitoyl)-2-palmitoleoyl-GPC (P-16:0/16:1)*	52713	HMDB11207	52923882	-	CCCCCCCCCCCCCC\C=C/OC[C@]([H])(COP([O-])(=O)OCC[N+](C)(C)C)OC(=O)CCCCCCC\C=C/CCCCCC	Lipids	Plasmalogen	Sensitivity	Weighted mode	-	-	-	-	-	-	-	-	6	0.98 (0.85-1.13)	0.815424	-	-	-	-	-	-	-
	1-(1-enyl-palmitoyl)-2-palmitoyl-GPC (P-16:0/16:0)*	52716	HMDB11206	11146967	-	CCCCCCCCCCCCCCCC(=O)O[C@]([H])(CO\C=C/CCCCCCCCCCCCCC)COP([O-])(=O)OCC[N+](C)(C)C	Lipids	Plasmalogen	Primary	Inverse variance weighted (random effects)/ Wald ratio	-	-	-	-	-	-	-	-	7	0.99 (0.9-1.09)	0.823985	0.994872	-	-	-	-	-	-
	1-(1-enyl-palmitoyl)-2-palmitoyl-GPC (P-16:0/16:0)*	52716	HMDB11206	11146967	-	CCCCCCCCCCCCCCCC(=O)O[C@]([H])(CO\C=C/CCCCCCCCCCCCCC)COP([O-])(=O)OCC[N+](C)(C)C	Lipids	Plasmalogen	Sensitivity	Inverse variance weighted (fixed effects)	-	-	-	-	-	-	-	-	7	0.99 (0.9-1.09)	0.814647	-	-	-	-	-	-	-
	1-(1-enyl-palmitoyl)-2-palmitoyl-GPC (P-16:0/16:0)*	52716	HMDB11206	11146967	-	CCCCCCCCCCCCCCCC(=O)O[C@]([H])(CO\C=C/CCCCCCCCCCCCCC)COP([O-])(=O)OCC[N+](C)(C)C	Lipids	Plasmalogen	Sensitivity	Inverse variance weighted (multiplicative random effects)	-	-	-	-	-	-	-	-	7	0.99 (0.9-1.09)	0.823985	-	-	-	-	-	-	-
	1-(1-enyl-palmitoyl)-2-palmitoyl-GPC (P-16:0/16:0)*	52716	HMDB11206	11146967	-	CCCCCCCCCCCCCCCC(=O)O[C@]([H])(CO\C=C/CCCCCCCCCCCCCC)COP([O-])(=O)OCC[N+](C)(C)C	Lipids	Plasmalogen	Sensitivity	MR Egger	-	-	-	-	-	-	-	-	7	1 (0.74-1.35)	0.98674	-	-	-	-	-	-	-
	1-(1-enyl-palmitoyl)-2-palmitoyl-GPC (P-16:0/16:0)*	52716	HMDB11206	11146967	-	CCCCCCCCCCCCCCCC(=O)O[C@]([H])(CO\C=C/CCCCCCCCCCCCCC)COP([O-])(=O)OCC[N+](C)(C)C	Lipids	Plasmalogen	Sensitivity	Weighted median	-	-	-	-	-	-	-	-	7	0.99 (0.88-1.11)	0.858822	-	-	-	-	-	-	-
	1-(1-enyl-palmitoyl)-2-palmitoyl-GPC (P-16:0/16:0)*	52716	HMDB11206	11146967	-	CCCCCCCCCCCCCCCC(=O)O[C@]([H])(CO\C=C/CCCCCCCCCCCCCC)COP([O-])(=O)OCC[N+](C)(C)C	Lipids	Plasmalogen	Sensitivity	Weighted mode	-	-	-	-	-	-	-	-	7	0.99 (0.87-1.13)	0.892365	-	-	-	-	-	-	-
	1-(1-enyl-palmitoyl)-GPC (P-16:0)*	52474	HMDB10407	10917802	C04230	CCCCCCCCCCCCCC\C=C/OC[C@](O)([H])COP([O-])(=O)OCC[N+](C)(C)C	Lipids	Lysoplasmalogen	Primary	Inverse variance weighted (random effects)/ Wald ratio	-	-	-	-	-	-	-	-	3	1.11 (0.91-1.35)	0.28646	0.860923	-	-	-	-	-	-
	1-(1-enyl-palmitoyl)-GPC (P-16:0)*	52474	HMDB10407	10917802	C04230	CCCCCCCCCCCCCC\C=C/OC[C@](O)([H])COP([O-])(=O)OCC[N+](C)(C)C	Lipids	Lysoplasmalogen	Sensitivity	Inverse variance weighted (fixed effects)	-	-	-	-	-	-	-	-	3	1.11 (0.91-1.35)	0.28646	-	-	-	-	-	-	-
	1-(1-enyl-palmitoyl)-GPC (P-16:0)*	52474	HMDB10407	10917802	C04230	CCCCCCCCCCCCCC\C=C/OC[C@](O)([H])COP([O-])(=O)OCC[N+](C)(C)C	Lipids	Lysoplasmalogen	Sensitivity	Inverse variance weighted (multiplicative random effects)	-	-	-	-	-	-	-	-	3	1.11 (0.97-1.27)	0.114933	-	-	-	-	-	-	-
	1-(1-enyl-palmitoyl)-GPC (P-16:0)*	52474	HMDB10407	10917802	C04230	CCCCCCCCCCCCCC\C=C/OC[C@](O)([H])COP([O-])(=O)OCC[N+](C)(C)C	Lipids	Lysoplasmalogen	Sensitivity	MR Egger	-	-	-	-	-	-	-	-	3	1.43 (0.44-4.66)	0.658246	-	-	-	-	-	-	-
	1-(1-enyl-palmitoyl)-GPC (P-16:0)*	52474	HMDB10407	10917802	C04230	CCCCCCCCCCCCCC\C=C/OC[C@](O)([H])COP([O-])(=O)OCC[N+](C)(C)C	Lipids	Lysoplasmalogen	Sensitivity	Weighted median	-	-	-	-	-	-	-	-	3	1.12 (0.9-1.4)	0.312992	-	-	-	-	-	-	-
	1-(1-enyl-palmitoyl)-GPC (P-16:0)*	52474	HMDB10407	10917802	C04230	CCCCCCCCCCCCCC\C=C/OC[C@](O)([H])COP([O-])(=O)OCC[N+](C)(C)C	Lipids	Lysoplasmalogen	Sensitivity	Weighted mode	-	-	-	-	-	-	-	-	3	1.13 (0.86-1.48)	0.465302	-	-	-	-	-	-	-
	1-(1-enyl-stearoyl)-2-arachidonoyl-GPE (P-18:0/20:4)*	52475	HMDB05779	9547058	C00350	[H][C@@](CO\C=C/CCCCCCCCCCCCCCCC)(COP(O)(=O)OCCN)OC(=O)CCC\C=C/C\C=C/C\C=C/C\C=C/CCCCC	Lipids	Plasmalogen	Primary	Inverse variance weighted (random effects)/ Wald ratio	-	-	-	-	-	-	-	-	16	1.15 (1.06-1.26)	0.00162331	0.0286978	-	-	-	-	-	-
	1-(1-enyl-stearoyl)-2-arachidonoyl-GPE (P-18:0/20:4)*	52475	HMDB05779	9547058	C00350	[H][C@@](CO\C=C/CCCCCCCCCCCCCCCC)(COP(O)(=O)OCCN)OC(=O)CCC\C=C/C\C=C/C\C=C/C\C=C/CCCCC	Lipids	Plasmalogen	Sensitivity	Inverse variance weighted (fixed effects)	-	-	-	-	-	-	-	-	16	1.15 (1.06-1.26)	0.00162331	-	-	-	-	-	-	-
	1-(1-enyl-stearoyl)-2-arachidonoyl-GPE (P-18:0/20:4)*	52475	HMDB05779	9547058	C00350	[H][C@@](CO\C=C/CCCCCCCCCCCCCCCC)(COP(O)(=O)OCCN)OC(=O)CCC\C=C/C\C=C/C\C=C/C\C=C/CCCCC	Lipids	Plasmalogen	Sensitivity	Inverse variance weighted (multiplicative random effects)	-	-	-	-	-	-	-	-	16	1.15 (1.07-1.24)	0.00019267	-	-	-	-	-	-	-
	1-(1-enyl-stearoyl)-2-arachidonoyl-GPE (P-18:0/20:4)*	52475	HMDB05779	9547058	C00350	[H][C@@](CO\C=C/CCCCCCCCCCCCCCCC)(COP(O)(=O)OCCN)OC(=O)CCC\C=C/C\C=C/C\C=C/C\C=C/CCCCC	Lipids	Plasmalogen	Sensitivity	MR Egger	-	-	-	-	-	-	-	-	16	1.07 (0.75-1.52)	0.705586	-	-	-	-	-	-	-
	1-(1-enyl-stearoyl)-2-arachidonoyl-GPE (P-18:0/20:4)*	52475	HMDB05779	9547058	C00350	[H][C@@](CO\C=C/CCCCCCCCCCCCCCCC)(COP(O)(=O)OCCN)OC(=O)CCC\C=C/C\C=C/C\C=C/C\C=C/CCCCC	Lipids	Plasmalogen	Sensitivity	Weighted median	-	-	-	-	-	-	-	-	16	1.16 (1.03-1.31)	0.0134762	-	-	-	-	-	-	-
	1-(1-enyl-stearoyl)-2-arachidonoyl-GPE (P-18:0/20:4)*	52475	HMDB05779	9547058	C00350	[H][C@@](CO\C=C/CCCCCCCCCCCCCCCC)(COP(O)(=O)OCCN)OC(=O)CCC\C=C/C\C=C/C\C=C/C\C=C/CCCCC	Lipids	Plasmalogen	Sensitivity	Weighted mode	-	-	-	-	-	-	-	-	16	1.17 (1-1.37)	0.0679389	-	-	-	-	-	-	-
	1-(1-enyl-stearoyl)-2-linoleoyl-GPE (P-18:0/18:2)*	52748	HMDB11376	52925079	-	[H][C@@](CO\C=C/CCCCCCCCCCCCCCCC)(COP(O)(=O)OCCN)OC(=O)CCCCCCC\C=C/C\C=C/CCCCC	Lipids	Plasmalogen	Primary	Inverse variance weighted (random effects)/ Wald ratio	-	-	-	-	-	-	-	-	2	0.91 (0.6-1.39)	0.662445	0.994872	-	-	-	-	-	-
	1-(1-enyl-stearoyl)-2-linoleoyl-GPE (P-18:0/18:2)*	52748	HMDB11376	52925079	-	[H][C@@](CO\C=C/CCCCCCCCCCCCCCCC)(COP(O)(=O)OCCN)OC(=O)CCCCCCC\C=C/C\C=C/CCCCC	Lipids	Plasmalogen	Sensitivity	Inverse variance weighted (fixed effects)	-	-	-	-	-	-	-	-	2	0.91 (0.71-1.17)	0.464992	-	-	-	-	-	-	-
	1-(1-enyl-stearoyl)-2-linoleoyl-GPE (P-18:0/18:2)*	52748	HMDB11376	52925079	-	[H][C@@](CO\C=C/CCCCCCCCCCCCCCCC)(COP(O)(=O)OCCN)OC(=O)CCCCCCC\C=C/C\C=C/CCCCC	Lipids	Plasmalogen	Sensitivity	Inverse variance weighted (multiplicative random effects)	-	-	-	-	-	-	-	-	2	0.91 (0.6-1.39)	0.662445	-	-	-	-	-	-	-
	1-(1-enyl-stearoyl)-2-oleoyl-GPE (P-18:0/18:1)	52614	HMDB11375	42607457	-	[H][C@@](CO\C=C/CCCCCCCCCCCCCCCC)(COP(O)(=O)OCCN)OC(=O)CCCCCCC\C=C/CCCCCCCC	Lipids	Plasmalogen	Primary	Inverse variance weighted (random effects)/ Wald ratio	-	-	-	-	-	-	-	-	1	1.17 (0.74-1.84)	0.506736	0.994872	-	-	-	-	-	-
	1-arachidonoyl-GPA (20:4)	46325	-	-	-	-	Lipids	Lysophospholipid	Primary	Inverse variance weighted (random effects)/ Wald ratio	-	-	-	-	-	-	-	-	3	1.08 (0.81-1.44)	0.611326	0.994872	-	-	-	-	-	-
	1-arachidonoyl-GPA (20:4)	46325	-	-	-	-	Lipids	Lysophospholipid	Sensitivity	Inverse variance weighted (fixed effects)	-	-	-	-	-	-	-	-	3	1.08 (0.87-1.33)	0.480732	-	-	-	-	-	-	-
	1-arachidonoyl-GPA (20:4)	46325	-	-	-	-	Lipids	Lysophospholipid	Sensitivity	Inverse variance weighted (multiplicative random effects)	-	-	-	-	-	-	-	-	3	1.08 (0.81-1.44)	0.611326	-	-	-	-	-	-	-
	1-arachidonoyl-GPA (20:4)	46325	-	-	-	-	Lipids	Lysophospholipid	Sensitivity	MR Egger	-	-	-	-	-	-	-	-	3	1.14 (0.31-4.21)	0.873475	-	-	-	-	-	-	-
	1-arachidonoyl-GPA (20:4)	46325	-	-	-	-	Lipids	Lysophospholipid	Sensitivity	Weighted median	-	-	-	-	-	-	-	-	3	1.16 (0.88-1.53)	0.288351	-	-	-	-	-	-	-
	1-arachidonoyl-GPA (20:4)	46325	-	-	-	-	Lipids	Lysophospholipid	Sensitivity	Weighted mode	-	-	-	-	-	-	-	-	3	1.23 (0.87-1.75)	0.368615	-	-	-	-	-	-	-
	1-arachidonoyl-GPC (20:4n6)*	33228	HMDB10395	24779476	C05208	CCCCC\C=C/C\C=C/C\C=C/C\C=C/CCCC(=O)OC[C@@H](O)COP([O-])(=O)OCC[N+](C)(C)C	Lipids	Lysophospholipid	Primary	Inverse variance weighted (random effects)/ Wald ratio	1	1.12 (0.98-1.29)	0.0915157	0.863252	1	1.03 (1-1.05)	0.0675675	0.287844	145	1.18 (1.14-1.21)	6.96e-31	1.15e-28	3	1.1 (1.08-1.12)	1.83972e-21	2.41004e-19	95.9343	2.08009e-11
	1-arachidonoyl-GPC (20:4n6)*	33228	HMDB10395	24779476	C05208	CCCCC\C=C/C\C=C/C\C=C/C\C=C/CCCC(=O)OC[C@@H](O)COP([O-])(=O)OCC[N+](C)(C)C	Lipids	Lysophospholipid	Sensitivity	Inverse variance weighted (fixed effects)	-	-	-	-	-	-	-	-	145	1.18 (1.14-1.21)	5.42e-32	-	-	-	-	-	-	-
	1-arachidonoyl-GPC (20:4n6)*	33228	HMDB10395	24779476	C05208	CCCCC\C=C/C\C=C/C\C=C/C\C=C/CCCC(=O)OC[C@@H](O)COP([O-])(=O)OCC[N+](C)(C)C	Lipids	Lysophospholipid	Sensitivity	Inverse variance weighted (multiplicative random effects)	-	-	-	-	-	-	-	-	145	1.18 (1.14-1.21)	6.96e-31	-	-	-	-	-	-	-
	1-arachidonoyl-GPC (20:4n6)*	33228	HMDB10395	24779476	C05208	CCCCC\C=C/C\C=C/C\C=C/C\C=C/CCCC(=O)OC[C@@H](O)COP([O-])(=O)OCC[N+](C)(C)C	Lipids	Lysophospholipid	Sensitivity	MR Egger	-	-	-	-	-	-	-	-	145	0.98 (0.91-1.06)	0.666692	-	-	-	-	-	-	-
	1-arachidonoyl-GPC (20:4n6)*	33228	HMDB10395	24779476	C05208	CCCCC\C=C/C\C=C/C\C=C/C\C=C/CCCC(=O)OC[C@@H](O)COP([O-])(=O)OCC[N+](C)(C)C	Lipids	Lysophospholipid	Sensitivity	Weighted median	-	-	-	-	-	-	-	-	145	1.12 (1.07-1.17)	9.16e-08	-	-	-	-	-	-	-
	1-arachidonoyl-GPC (20:4n6)*	33228	HMDB10395	24779476	C05208	CCCCC\C=C/C\C=C/C\C=C/C\C=C/CCCC(=O)OC[C@@H](O)COP([O-])(=O)OCC[N+](C)(C)C	Lipids	Lysophospholipid	Sensitivity	Weighted mode	-	-	-	-	-	-	-	-	145	1.09 (1.02-1.16)	0.00856638	-	-	-	-	-	-	-
	1-arachidonoyl-GPE (20:4n6)*	35186	HMDB11517	42607465	-	[H][C@@](O)(COC(=O)CCC\C=C/C\C=C/C\C=C/C\C=C/CCCCC)COP(O)(=O)OCCN	Lipids	Lysophospholipid	Primary	Inverse variance weighted (random effects)/ Wald ratio	1	0.95 (0.83-1.08)	0.409035	0.863252	2	1.02 (0.97-1.07)	0.526863	0.845067	37	1.24 (1.16-1.32)	6.6e-10	3.63e-08	3	1.08 (1.04-1.12)	0.000183946	0.00302983	92.0726	3.32354e-06
	1-arachidonoyl-GPE (20:4n6)*	35186	HMDB11517	42607465	-	[H][C@@](O)(COC(=O)CCC\C=C/C\C=C/C\C=C/C\C=C/CCCCC)COP(O)(=O)OCCN	Lipids	Lysophospholipid	Sensitivity	Inverse variance weighted (fixed effects)	-	-	-	-	2	1.02 (0.99-1.05)	0.295108	-	37	1.24 (1.17-1.31)	1.67e-12	-	-	-	-	-	-	-
	1-arachidonoyl-GPE (20:4n6)*	35186	HMDB11517	42607465	-	[H][C@@](O)(COC(=O)CCC\C=C/C\C=C/C\C=C/C\C=C/CCCCC)COP(O)(=O)OCCN	Lipids	Lysophospholipid	Sensitivity	Inverse variance weighted (multiplicative random effects)	-	-	-	-	2	1.02 (0.97-1.07)	0.526863	-	37	1.24 (1.16-1.32)	6.6e-10	-	-	-	-	-	-	-
	1-arachidonoyl-GPE (20:4n6)*	35186	HMDB11517	42607465	-	[H][C@@](O)(COC(=O)CCC\C=C/C\C=C/C\C=C/C\C=C/CCCCC)COP(O)(=O)OCCN	Lipids	Lysophospholipid	Sensitivity	MR Egger	-	-	-	-	-	-	-	-	37	1.02 (0.78-1.35)	0.866883	-	-	-	-	-	-	-
	1-arachidonoyl-GPE (20:4n6)*	35186	HMDB11517	42607465	-	[H][C@@](O)(COC(=O)CCC\C=C/C\C=C/C\C=C/C\C=C/CCCCC)COP(O)(=O)OCCN	Lipids	Lysophospholipid	Sensitivity	Weighted median	-	-	-	-	-	-	-	-	37	1.15 (1.05-1.27)	0.002389	-	-	-	-	-	-	-
	1-arachidonoyl-GPE (20:4n6)*	35186	HMDB11517	42607465	-	[H][C@@](O)(COC(=O)CCC\C=C/C\C=C/C\C=C/C\C=C/CCCCC)COP(O)(=O)OCCN	Lipids	Lysophospholipid	Sensitivity	Weighted mode	-	-	-	-	-	-	-	-	37	1.12 (1-1.26)	0.0617911	-	-	-	-	-	-	-
	1-arachidonoyl-GPI (20:4)*	34214	HMDB61690	-		-	Lipids	Lysophospholipid	Primary	Inverse variance weighted (random effects)/ Wald ratio	1	1.07 (0.93-1.23)	0.336871	0.863252	1	1.04 (0.99-1.08)	0.0997326	0.341021	7	1.19 (1.03-1.37)	0.0148928	0.147151	3	1.05 (1.01-1.09)	0.0141953	0.0929795	43.6173	0.169722
	1-arachidonoyl-GPI (20:4)*	34214	HMDB61690	-		-	Lipids	Lysophospholipid	Sensitivity	Inverse variance weighted (fixed effects)	-	-	-	-	-	-	-	-	7	1.19 (1.03-1.37)	0.0148928	-	-	-	-	-	-	-
	1-arachidonoyl-GPI (20:4)*	34214	HMDB61690	-		-	Lipids	Lysophospholipid	Sensitivity	Inverse variance weighted (multiplicative random effects)	-	-	-	-	-	-	-	-	7	1.19 (1.07-1.32)	0.00165591	-	-	-	-	-	-	-
	1-arachidonoyl-GPI (20:4)*	34214	HMDB61690	-		-	Lipids	Lysophospholipid	Sensitivity	MR Egger	-	-	-	-	-	-	-	-	7	1.18 (0.56-2.51)	0.684891	-	-	-	-	-	-	-
	1-arachidonoyl-GPI (20:4)*	34214	HMDB61690	-		-	Lipids	Lysophospholipid	Sensitivity	Weighted median	-	-	-	-	-	-	-	-	7	1.17 (0.98-1.4)	0.0749353	-	-	-	-	-	-	-
	1-arachidonoyl-GPI (20:4)*	34214	HMDB61690	-		-	Lipids	Lysophospholipid	Sensitivity	Weighted mode	-	-	-	-	-	-	-	-	7	1.16 (0.93-1.45)	0.242623	-	-	-	-	-	-	-
	1-arachidonylglycerol (20:4)	34397	HMDB11549	5282281	C13857	[H]C(CO)(CO)OC(=O)CCCCCC\C=C/C\C=C/C\C=C/C\C=C/CC	Lipids	Monoacylglycerol	Primary	Inverse variance weighted (random effects)/ Wald ratio	-	-	-	-	-	-	-	-	48	1.21 (1.15-1.27)	1.39e-12	9.83e-11	-	-	-	-	-	-
	1-arachidonylglycerol (20:4)	34397	HMDB11549	5282281	C13857	[H]C(CO)(CO)OC(=O)CCCCCC\C=C/C\C=C/C\C=C/C\C=C/CC	Lipids	Monoacylglycerol	Sensitivity	Inverse variance weighted (fixed effects)	-	-	-	-	-	-	-	-	48	1.21 (1.15-1.27)	1.39e-12	-	-	-	-	-	-	-
	1-arachidonylglycerol (20:4)	34397	HMDB11549	5282281	C13857	[H]C(CO)(CO)OC(=O)CCCCCC\C=C/C\C=C/C\C=C/C\C=C/CC	Lipids	Monoacylglycerol	Sensitivity	Inverse variance weighted (multiplicative random effects)	-	-	-	-	-	-	-	-	48	1.21 (1.15-1.27)	8.42e-13	-	-	-	-	-	-	-
	1-arachidonylglycerol (20:4)	34397	HMDB11549	5282281	C13857	[H]C(CO)(CO)OC(=O)CCCCCC\C=C/C\C=C/C\C=C/C\C=C/CC	Lipids	Monoacylglycerol	Sensitivity	MR Egger	-	-	-	-	-	-	-	-	48	0.96 (0.81-1.15)	0.689311	-	-	-	-	-	-	-
	1-arachidonylglycerol (20:4)	34397	HMDB11549	5282281	C13857	[H]C(CO)(CO)OC(=O)CCCCCC\C=C/C\C=C/C\C=C/C\C=C/CC	Lipids	Monoacylglycerol	Sensitivity	Weighted median	-	-	-	-	-	-	-	-	48	1.14 (1.05-1.24)	0.00126303	-	-	-	-	-	-	-
	1-arachidonylglycerol (20:4)	34397	HMDB11549	5282281	C13857	[H]C(CO)(CO)OC(=O)CCCCCC\C=C/C\C=C/C\C=C/C\C=C/CC	Lipids	Monoacylglycerol	Sensitivity	Weighted mode	-	-	-	-	-	-	-	-	48	1.13 (1.03-1.25)	0.017389	-	-	-	-	-	-	-
	1-dihomo-linolenylglycerol (20:3)	48341	-	-	-	-	Lipids	Monoacylglycerol	Primary	Inverse variance weighted (random effects)/ Wald ratio	-	-	-	-	-	-	-	-	2	0.98 (0.58-1.66)	0.952602	0.999021	-	-	-	-	-	-
	1-dihomo-linolenylglycerol (20:3)	48341	-	-	-	-	Lipids	Monoacylglycerol	Sensitivity	Inverse variance weighted (fixed effects)	-	-	-	-	-	-	-	-	2	0.98 (0.76-1.27)	0.90439	-	-	-	-	-	-	-
	1-dihomo-linolenylglycerol (20:3)	48341	-	-	-	-	Lipids	Monoacylglycerol	Sensitivity	Inverse variance weighted (multiplicative random effects)	-	-	-	-	-	-	-	-	2	0.98 (0.58-1.66)	0.952602	-	-	-	-	-	-	-
	1-docosahexaenoylglycerol (22:6)	35153	HMDB11587	53480995	-	[H][C@](O)(CO)COC(=O)CC\C=C/C\C=C/C\C=C/C\C=C/C\C=C/C\C=C/CC	Lipids	Monoacylglycerol	Primary	Inverse variance weighted (random effects)/ Wald ratio	-	-	-	-	-	-	-	-	1	0.88 (0.57-1.37)	0.575103	0.994872	-	-	-	-	-	-
	1-linolenoyl-GPC (18:3)*	45951	HMDB10388	24779469	C04230	CC\C=C/C\C=C/C\C=C/CCCCCCCC(=O)OC[C@](O)([H])COP([O-])(=O)OCC[N+](C)(C)C	Lipids	Lysophospholipid	Primary	Inverse variance weighted (random effects)/ Wald ratio	-	-	-	-	-	-	-	-	2	0.85 (0.63-1.15)	0.296125	0.860923	-	-	-	-	-	-
	1-linolenoyl-GPC (18:3)*	45951	HMDB10388	24779469	C04230	CC\C=C/C\C=C/C\C=C/CCCCCCCC(=O)OC[C@](O)([H])COP([O-])(=O)OCC[N+](C)(C)C	Lipids	Lysophospholipid	Sensitivity	Inverse variance weighted (fixed effects)	-	-	-	-	-	-	-	-	2	0.85 (0.63-1.15)	0.296125	-	-	-	-	-	-	-
	1-linolenoyl-GPC (18:3)*	45951	HMDB10388	24779469	C04230	CC\C=C/C\C=C/C\C=C/CCCCCCCC(=O)OC[C@](O)([H])COP([O-])(=O)OCC[N+](C)(C)C	Lipids	Lysophospholipid	Sensitivity	Inverse variance weighted (multiplicative random effects)	-	-	-	-	-	-	-	-	2	0.85 (0.67-1.08)	0.187725	-	-	-	-	-	-	-
	1-linolenoylglycerol (18:3)	34393	HMDB11569	53480978	-	[H][C@](O)(CO)COC(=O)CCCC\C=C/C\C=C/C\C=C/CCCCC	Lipids	Monoacylglycerol	Primary	Inverse variance weighted (random effects)/ Wald ratio	-	-	-	-	-	-	-	-	1	0.55 (0.35-0.87)	0.0104442	0.116296	-	-	-	-	-	-
	1-linoleoyl-2-arachidonoyl-GPC (18:2/20:4n6)*	52710	HMDB08147	24778979	C00157	CCCCC\C=C/C\C=C/CCCCCCCC(=O)OC[C@]([H])(COP([O-])(=O)OCC[N+](C)(C)C)OC(=O)CCC\C=C/C\C=C/C\C=C/C\C=C/CCCCC	Lipids	Phosphatidylcholine (PC)	Primary	Inverse variance weighted (random effects)/ Wald ratio	-	-	-	-	-	-	-	-	19	1.22 (1.11-1.34)	1.79e-05	0.000632893	-	-	-	-	-	-
	1-linoleoyl-2-arachidonoyl-GPC (18:2/20:4n6)*	52710	HMDB08147	24778979	C00157	CCCCC\C=C/C\C=C/CCCCCCCC(=O)OC[C@]([H])(COP([O-])(=O)OCC[N+](C)(C)C)OC(=O)CCC\C=C/C\C=C/C\C=C/C\C=C/CCCCC	Lipids	Phosphatidylcholine (PC)	Sensitivity	Inverse variance weighted (fixed effects)	-	-	-	-	-	-	-	-	19	1.22 (1.13-1.32)	3.86e-07	-	-	-	-	-	-	-
	1-linoleoyl-2-arachidonoyl-GPC (18:2/20:4n6)*	52710	HMDB08147	24778979	C00157	CCCCC\C=C/C\C=C/CCCCCCCC(=O)OC[C@]([H])(COP([O-])(=O)OCC[N+](C)(C)C)OC(=O)CCC\C=C/C\C=C/C\C=C/C\C=C/CCCCC	Lipids	Phosphatidylcholine (PC)	Sensitivity	Inverse variance weighted (multiplicative random effects)	-	-	-	-	-	-	-	-	19	1.22 (1.11-1.34)	1.79e-05	-	-	-	-	-	-	-
	1-linoleoyl-2-arachidonoyl-GPC (18:2/20:4n6)*	52710	HMDB08147	24778979	C00157	CCCCC\C=C/C\C=C/CCCCCCCC(=O)OC[C@]([H])(COP([O-])(=O)OCC[N+](C)(C)C)OC(=O)CCC\C=C/C\C=C/C\C=C/C\C=C/CCCCC	Lipids	Phosphatidylcholine (PC)	Sensitivity	MR Egger	-	-	-	-	-	-	-	-	19	0.95 (0.68-1.31)	0.74042	-	-	-	-	-	-	-
	1-linoleoyl-2-arachidonoyl-GPC (18:2/20:4n6)*	52710	HMDB08147	24778979	C00157	CCCCC\C=C/C\C=C/CCCCCCCC(=O)OC[C@]([H])(COP([O-])(=O)OCC[N+](C)(C)C)OC(=O)CCC\C=C/C\C=C/C\C=C/C\C=C/CCCCC	Lipids	Phosphatidylcholine (PC)	Sensitivity	Weighted median	-	-	-	-	-	-	-	-	19	1.15 (1.02-1.29)	0.019701	-	-	-	-	-	-	-
	1-linoleoyl-2-arachidonoyl-GPC (18:2/20:4n6)*	52710	HMDB08147	24778979	C00157	CCCCC\C=C/C\C=C/CCCCCCCC(=O)OC[C@]([H])(COP([O-])(=O)OCC[N+](C)(C)C)OC(=O)CCC\C=C/C\C=C/C\C=C/C\C=C/CCCCC	Lipids	Phosphatidylcholine (PC)	Sensitivity	Weighted mode	-	-	-	-	-	-	-	-	19	1.15 (1.01-1.31)	0.045688	-	-	-	-	-	-	-
	1-linoleoyl-2-linolenoyl-GPC (18:2/18:3)*	53176	HMDB08141	52922731	C00157	CCCCC\C=C/C\C=C/CCCCCCCC(=O)OC[C@]([H])(COP([O-])(=O)OCC[N+](C)(C)C)OC(=O)CCCCCCC\C=C/C\C=C/C\C=C/CC	Lipids	Phosphatidylcholine (PC)	Primary	Inverse variance weighted (random effects)/ Wald ratio	-	-	-	-	-	-	-	-	4	0.84 (0.71-1)	0.0532749	0.329639	-	-	-	-	-	-
	1-linoleoyl-2-linolenoyl-GPC (18:2/18:3)*	53176	HMDB08141	52922731	C00157	CCCCC\C=C/C\C=C/CCCCCCCC(=O)OC[C@]([H])(COP([O-])(=O)OCC[N+](C)(C)C)OC(=O)CCCCCCC\C=C/C\C=C/C\C=C/CC	Lipids	Phosphatidylcholine (PC)	Sensitivity	Inverse variance weighted (fixed effects)	-	-	-	-	-	-	-	-	4	0.84 (0.71-1)	0.0532749	-	-	-	-	-	-	-
	1-linoleoyl-2-linolenoyl-GPC (18:2/18:3)*	53176	HMDB08141	52922731	C00157	CCCCC\C=C/C\C=C/CCCCCCCC(=O)OC[C@]([H])(COP([O-])(=O)OCC[N+](C)(C)C)OC(=O)CCCCCCC\C=C/C\C=C/C\C=C/CC	Lipids	Phosphatidylcholine (PC)	Sensitivity	Inverse variance weighted (multiplicative random effects)	-	-	-	-	-	-	-	-	4	0.84 (0.76-0.93)	0.00119167	-	-	-	-	-	-	-
	1-linoleoyl-2-linolenoyl-GPC (18:2/18:3)*	53176	HMDB08141	52922731	C00157	CCCCC\C=C/C\C=C/CCCCCCCC(=O)OC[C@]([H])(COP([O-])(=O)OCC[N+](C)(C)C)OC(=O)CCCCCCC\C=C/C\C=C/C\C=C/CC	Lipids	Phosphatidylcholine (PC)	Sensitivity	MR Egger	-	-	-	-	-	-	-	-	4	0.68 (0.35-1.32)	0.371509	-	-	-	-	-	-	-
	1-linoleoyl-2-linolenoyl-GPC (18:2/18:3)*	53176	HMDB08141	52922731	C00157	CCCCC\C=C/C\C=C/CCCCCCCC(=O)OC[C@]([H])(COP([O-])(=O)OCC[N+](C)(C)C)OC(=O)CCCCCCC\C=C/C\C=C/C\C=C/CC	Lipids	Phosphatidylcholine (PC)	Sensitivity	Weighted median	-	-	-	-	-	-	-	-	4	0.81 (0.67-0.98)	0.0338201	-	-	-	-	-	-	-
	1-linoleoyl-2-linolenoyl-GPC (18:2/18:3)*	53176	HMDB08141	52922731	C00157	CCCCC\C=C/C\C=C/CCCCCCCC(=O)OC[C@]([H])(COP([O-])(=O)OCC[N+](C)(C)C)OC(=O)CCCCCCC\C=C/C\C=C/C\C=C/CC	Lipids	Phosphatidylcholine (PC)	Sensitivity	Weighted mode	-	-	-	-	-	-	-	-	4	0.8 (0.63-1.03)	0.184835	-	-	-	-	-	-	-
	1-linoleoyl-GPC (18:2)	34419	HMDB10386	11988421	C04100	CCCCC\C=C/C\C=C/CCCCCCCC(=O)OC[C@@H](O)COP([O-])(=O)OCC[N+](C)(C)C	Lipids	Lysophospholipid	Primary	Inverse variance weighted (random effects)/ Wald ratio	-	-	-	-	-	-	-	-	2	0.84 (0.66-1.06)	0.149346	0.6257	-	-	-	-	-	-
	1-linoleoyl-GPC (18:2)	34419	HMDB10386	11988421	C04100	CCCCC\C=C/C\C=C/CCCCCCCC(=O)OC[C@@H](O)COP([O-])(=O)OCC[N+](C)(C)C	Lipids	Lysophospholipid	Sensitivity	Inverse variance weighted (fixed effects)	-	-	-	-	-	-	-	-	2	0.84 (0.66-1.06)	0.149346	-	-	-	-	-	-	-
	1-linoleoyl-GPC (18:2)	34419	HMDB10386	11988421	C04100	CCCCC\C=C/C\C=C/CCCCCCCC(=O)OC[C@@H](O)COP([O-])(=O)OCC[N+](C)(C)C	Lipids	Lysophospholipid	Sensitivity	Inverse variance weighted (multiplicative random effects)	-	-	-	-	-	-	-	-	2	0.84 (0.73-0.97)	0.0167561	-	-	-	-	-	-	-
	1-linoleoyl-GPE (18:2)*	36600	HMDB11507	52925130	-	[H][C@@](O)(COC(=O)CCCCCCC\C=C/C\C=C/CCCCC)COP(O)(=O)OCCN	Lipids	Lysophospholipid	Primary	Inverse variance weighted (random effects)/ Wald ratio	1	0.84 (0.72-0.98)	0.0313114	0.610482	1	0.97 (0.94-1)	0.0678878	0.287844	28	0.87 (0.81-0.92)	2.22e-05	0.0007326	3	0.94 (0.92-0.97)	0.000119401	0.00262006	82.0667	0.00378686
	1-linoleoyl-GPE (18:2)*	36600	HMDB11507	52925130	-	[H][C@@](O)(COC(=O)CCCCCCC\C=C/C\C=C/CCCCC)COP(O)(=O)OCCN	Lipids	Lysophospholipid	Sensitivity	Inverse variance weighted (fixed effects)	-	-	-	-	-	-	-	-	28	0.87 (0.81-0.92)	2.22e-05	-	-	-	-	-	-	-
	1-linoleoyl-GPE (18:2)*	36600	HMDB11507	52925130	-	[H][C@@](O)(COC(=O)CCCCCCC\C=C/C\C=C/CCCCC)COP(O)(=O)OCCN	Lipids	Lysophospholipid	Sensitivity	Inverse variance weighted (multiplicative random effects)	-	-	-	-	-	-	-	-	28	0.87 (0.82-0.91)	2.27e-07	-	-	-	-	-	-	-
	1-linoleoyl-GPE (18:2)*	36600	HMDB11507	52925130	-	[H][C@@](O)(COC(=O)CCCCCCC\C=C/C\C=C/CCCCC)COP(O)(=O)OCCN	Lipids	Lysophospholipid	Sensitivity	MR Egger	-	-	-	-	-	-	-	-	28	0.94 (0.75-1.19)	0.621865	-	-	-	-	-	-	-
	1-linoleoyl-GPE (18:2)*	36600	HMDB11507	52925130	-	[H][C@@](O)(COC(=O)CCCCCCC\C=C/C\C=C/CCCCC)COP(O)(=O)OCCN	Lipids	Lysophospholipid	Sensitivity	Weighted median	-	-	-	-	-	-	-	-	28	0.88 (0.8-0.97)	0.0118638	-	-	-	-	-	-	-
	1-linoleoyl-GPE (18:2)*	36600	HMDB11507	52925130	-	[H][C@@](O)(COC(=O)CCCCCCC\C=C/C\C=C/CCCCC)COP(O)(=O)OCCN	Lipids	Lysophospholipid	Sensitivity	Weighted mode	-	-	-	-	-	-	-	-	28	0.88 (0.78-0.99)	0.0392366	-	-	-	-	-	-	-
	1-linoleoyl-GPG (18:2)*	54885	-	-	-	-	Lipids	Lysophospholipid	Primary	Inverse variance weighted (random effects)/ Wald ratio	-	-	-	-	-	-	-	-	4	0.95 (0.81-1.11)	0.518345	0.994872	-	-	-	-	-	-
	1-linoleoyl-GPG (18:2)*	54885	-	-	-	-	Lipids	Lysophospholipid	Sensitivity	Inverse variance weighted (fixed effects)	-	-	-	-	-	-	-	-	4	0.95 (0.81-1.11)	0.518345	-	-	-	-	-	-	-
	1-linoleoyl-GPG (18:2)*	54885	-	-	-	-	Lipids	Lysophospholipid	Sensitivity	Inverse variance weighted (multiplicative random effects)	-	-	-	-	-	-	-	-	4	0.95 (0.83-1.09)	0.456037	-	-	-	-	-	-	-
	1-linoleoyl-GPG (18:2)*	54885	-	-	-	-	Lipids	Lysophospholipid	Sensitivity	MR Egger	-	-	-	-	-	-	-	-	4	1.32 (0.57-3.04)	0.579927	-	-	-	-	-	-	-
	1-linoleoyl-GPG (18:2)*	54885	-	-	-	-	Lipids	Lysophospholipid	Sensitivity	Weighted median	-	-	-	-	-	-	-	-	4	0.97 (0.8-1.16)	0.703486	-	-	-	-	-	-	-
	1-linoleoyl-GPG (18:2)*	54885	-	-	-	-	Lipids	Lysophospholipid	Sensitivity	Weighted mode	-	-	-	-	-	-	-	-	4	1.01 (0.82-1.23)	0.943577	-	-	-	-	-	-	-
	1-linoleoyl-GPI (18:2)*	36594	-	-	-	-	Lipids	Lysophospholipid	Primary	Inverse variance weighted (random effects)/ Wald ratio	-	-	-	-	-	-	-	-	3	0.91 (0.73-1.12)	0.376609	0.968831	-	-	-	-	-	-
	1-linoleoyl-GPI (18:2)*	36594	-	-	-	-	Lipids	Lysophospholipid	Sensitivity	Inverse variance weighted (fixed effects)	-	-	-	-	-	-	-	-	3	0.91 (0.73-1.12)	0.376609	-	-	-	-	-	-	-
	1-linoleoyl-GPI (18:2)*	36594	-	-	-	-	Lipids	Lysophospholipid	Sensitivity	Inverse variance weighted (multiplicative random effects)	-	-	-	-	-	-	-	-	3	0.91 (0.74-1.12)	0.36484	-	-	-	-	-	-	-
	1-linoleoyl-GPI (18:2)*	36594	-	-	-	-	Lipids	Lysophospholipid	Sensitivity	MR Egger	-	-	-	-	-	-	-	-	3	5.62 (0.36-86.86)	0.433272	-	-	-	-	-	-	-
	1-linoleoyl-GPI (18:2)*	36594	-	-	-	-	Lipids	Lysophospholipid	Sensitivity	Weighted median	-	-	-	-	-	-	-	-	3	0.99 (0.75-1.31)	0.946327	-	-	-	-	-	-	-
	1-linoleoyl-GPI (18:2)*	36594	-	-	-	-	Lipids	Lysophospholipid	Sensitivity	Weighted mode	-	-	-	-	-	-	-	-	3	1.01 (0.73-1.38)	0.977945	-	-	-	-	-	-	-
	1-linoleoylglycerol (18:2)	27447	-	5283469	-	-	Lipids	Monoacylglycerol	Primary	Inverse variance weighted (random effects)/ Wald ratio	-	-	-	-	-	-	-	-	1	0.95 (0.62-1.46)	0.818734	0.994872	-	-	-	-	-	-
	1-methylhistamine	43831	HMDB00898	3614	C05127	CN1C=NC(CCN)=C1	Amino Acids	Histidine Metabolism	Primary	Inverse variance weighted (random effects)/ Wald ratio	-	-	-	-	-	-	-	-	6	0.94 (0.81-1.08)	0.37839	0.968831	-	-	-	-	-	-
	1-methylhistamine	43831	HMDB00898	3614	C05127	CN1C=NC(CCN)=C1	Amino Acids	Histidine Metabolism	Sensitivity	Inverse variance weighted (fixed effects)	-	-	-	-	-	-	-	-	6	0.94 (0.81-1.08)	0.37839	-	-	-	-	-	-	-
	1-methylhistamine	43831	HMDB00898	3614	C05127	CN1C=NC(CCN)=C1	Amino Acids	Histidine Metabolism	Sensitivity	Inverse variance weighted (multiplicative random effects)	-	-	-	-	-	-	-	-	6	0.94 (0.81-1.08)	0.359493	-	-	-	-	-	-	-
	1-methylhistamine	43831	HMDB00898	3614	C05127	CN1C=NC(CCN)=C1	Amino Acids	Histidine Metabolism	Sensitivity	MR Egger	-	-	-	-	-	-	-	-	6	1.2 (0.68-2.1)	0.569079	-	-	-	-	-	-	-
	1-methylhistamine	43831	HMDB00898	3614	C05127	CN1C=NC(CCN)=C1	Amino Acids	Histidine Metabolism	Sensitivity	Weighted median	-	-	-	-	-	-	-	-	6	0.94 (0.78-1.14)	0.515902	-	-	-	-	-	-	-
	1-methylhistamine	43831	HMDB00898	3614	C05127	CN1C=NC(CCN)=C1	Amino Acids	Histidine Metabolism	Sensitivity	Weighted mode	-	-	-	-	-	-	-	-	6	1.08 (0.82-1.43)	0.592385	-	-	-	-	-	-	-
	1-methylhistidine	30460	HMDB00001	92105	C01152	CN1C=NC(C[C@H](N)C(O)=O)=C1	Amino Acids	Histidine Metabolism	Primary	Inverse variance weighted (random effects)/ Wald ratio	-	-	-	-	-	-	-	-	2	0.92 (0.7-1.21)	0.553466	0.994872	-	-	-	-	-	-
	1-methylhistidine	30460	HMDB00001	92105	C01152	CN1C=NC(C[C@H](N)C(O)=O)=C1	Amino Acids	Histidine Metabolism	Sensitivity	Inverse variance weighted (fixed effects)	-	-	-	-	-	-	-	-	2	0.92 (0.7-1.21)	0.553466	-	-	-	-	-	-	-
	1-methylhistidine	30460	HMDB00001	92105	C01152	CN1C=NC(C[C@H](N)C(O)=O)=C1	Amino Acids	Histidine Metabolism	Sensitivity	Inverse variance weighted (multiplicative random effects)	-	-	-	-	-	-	-	-	2	0.92 (0.77-1.11)	0.381741	-	-	-	-	-	-	-
	1-methylimidazoleacetate	32350	HMDB02820	75810	C05828	CN1C=NC(CC(O)=O)=C1	Amino Acids	Histidine Metabolism	Primary	Inverse variance weighted (random effects)/ Wald ratio	-	-	-	-	-	-	-	-	15	1 (0.92-1.08)	0.950451	0.999021	-	-	-	-	-	-
	1-methylimidazoleacetate	32350	HMDB02820	75810	C05828	CN1C=NC(CC(O)=O)=C1	Amino Acids	Histidine Metabolism	Sensitivity	Inverse variance weighted (fixed effects)	-	-	-	-	-	-	-	-	15	1 (0.92-1.08)	0.950451	-	-	-	-	-	-	-
	1-methylimidazoleacetate	32350	HMDB02820	75810	C05828	CN1C=NC(CC(O)=O)=C1	Amino Acids	Histidine Metabolism	Sensitivity	Inverse variance weighted (multiplicative random effects)	-	-	-	-	-	-	-	-	15	1 (0.94-1.06)	0.933819	-	-	-	-	-	-	-
	1-methylimidazoleacetate	32350	HMDB02820	75810	C05828	CN1C=NC(CC(O)=O)=C1	Amino Acids	Histidine Metabolism	Sensitivity	MR Egger	-	-	-	-	-	-	-	-	15	1.02 (0.83-1.26)	0.849548	-	-	-	-	-	-	-
	1-methylimidazoleacetate	32350	HMDB02820	75810	C05828	CN1C=NC(CC(O)=O)=C1	Amino Acids	Histidine Metabolism	Sensitivity	Weighted median	-	-	-	-	-	-	-	-	15	1.02 (0.91-1.13)	0.753339	-	-	-	-	-	-	-
	1-methylimidazoleacetate	32350	HMDB02820	75810	C05828	CN1C=NC(CC(O)=O)=C1	Amino Acids	Histidine Metabolism	Sensitivity	Weighted mode	-	-	-	-	-	-	-	-	15	1.02 (0.89-1.16)	0.804407	-	-	-	-	-	-	-
	1-methylurate	34395	HMDB03099	69726	C16359	CN1C(=O)NC2=C(NC(=O)N2)C1=O	Xenobiotics	Xanthine Metabolism	Primary	Inverse variance weighted (random effects)/ Wald ratio	1	0.81 (0.69-0.94)	0.00739092	0.242053	-	-	-	-	1	0.87 (0.67-1.14)	0.323409	0.893079	2	0.83 (0.72-0.94)	0.00489713	0.0400953	0	0.629169
	1-methylxanthine	34389	HMDB10738	80220	C16358	CN1C(=O)NC2=C(NC=N2)C1=O	Xenobiotics	Xanthine Metabolism	Primary	Inverse variance weighted (random effects)/ Wald ratio	-	-	-	-	-	-	-	-	4	0.84 (0.71-1)	0.0436932	0.288375	-	-	-	-	-	-
	1-methylxanthine	34389	HMDB10738	80220	C16358	CN1C(=O)NC2=C(NC=N2)C1=O	Xenobiotics	Xanthine Metabolism	Sensitivity	Inverse variance weighted (fixed effects)	-	-	-	-	-	-	-	-	4	0.84 (0.74-0.96)	0.0102318	-	-	-	-	-	-	-
	1-methylxanthine	34389	HMDB10738	80220	C16358	CN1C(=O)NC2=C(NC=N2)C1=O	Xenobiotics	Xanthine Metabolism	Sensitivity	Inverse variance weighted (multiplicative random effects)	-	-	-	-	-	-	-	-	4	0.84 (0.71-1)	0.0436932	-	-	-	-	-	-	-
	1-methylxanthine	34389	HMDB10738	80220	C16358	CN1C(=O)NC2=C(NC=N2)C1=O	Xenobiotics	Xanthine Metabolism	Sensitivity	MR Egger	-	-	-	-	-	-	-	-	4	0.84 (0.39-1.81)	0.7003	-	-	-	-	-	-	-
	1-methylxanthine	34389	HMDB10738	80220	C16358	CN1C(=O)NC2=C(NC=N2)C1=O	Xenobiotics	Xanthine Metabolism	Sensitivity	Weighted median	-	-	-	-	-	-	-	-	4	0.89 (0.77-1.03)	0.123805	-	-	-	-	-	-	-
	1-methylxanthine	34389	HMDB10738	80220	C16358	CN1C(=O)NC2=C(NC=N2)C1=O	Xenobiotics	Xanthine Metabolism	Sensitivity	Weighted mode	-	-	-	-	-	-	-	-	4	0.9 (0.77-1.06)	0.294788	-	-	-	-	-	-	-
	1-myristoylglycerol (14:0)	35625	HMDB11561	79050	C01885	[H][C@](O)(CO)COC(=O)CCCCCCCCCCCCC	Lipids	Monoacylglycerol	Primary	Inverse variance weighted (random effects)/ Wald ratio	-	-	-	-	-	-	-	-	1	0.54 (0.33-0.87)	0.0109652	0.116296	-	-	-	-	-	-
	1-oleoyl-GPE (18:1)	35628	HMDB11506	9547071	-	[H][C@@](O)(COC(=O)CCCCCCC\C=C/CCCCCCCC)COP(O)(=O)OCCN	Lipids	Lysophospholipid	Primary	Inverse variance weighted (random effects)/ Wald ratio	-	-	-	-	-	-	-	-	3	0.99 (0.82-1.19)	0.909181	0.997882	-	-	-	-	-	-
	1-oleoyl-GPE (18:1)	35628	HMDB11506	9547071	-	[H][C@@](O)(COC(=O)CCCCCCC\C=C/CCCCCCCC)COP(O)(=O)OCCN	Lipids	Lysophospholipid	Sensitivity	Inverse variance weighted (fixed effects)	-	-	-	-	-	-	-	-	3	0.99 (0.82-1.19)	0.909181	-	-	-	-	-	-	-
	1-oleoyl-GPE (18:1)	35628	HMDB11506	9547071	-	[H][C@@](O)(COC(=O)CCCCCCC\C=C/CCCCCCCC)COP(O)(=O)OCCN	Lipids	Lysophospholipid	Sensitivity	Inverse variance weighted (multiplicative random effects)	-	-	-	-	-	-	-	-	3	0.99 (0.97-1)	0.152651	-	-	-	-	-	-	-
	1-oleoyl-GPE (18:1)	35628	HMDB11506	9547071	-	[H][C@@](O)(COC(=O)CCCCCCC\C=C/CCCCCCCC)COP(O)(=O)OCCN	Lipids	Lysophospholipid	Sensitivity	MR Egger	-	-	-	-	-	-	-	-	3	1.06 (0.26-4.29)	0.945194	-	-	-	-	-	-	-
	1-oleoyl-GPE (18:1)	35628	HMDB11506	9547071	-	[H][C@@](O)(COC(=O)CCCCCCC\C=C/CCCCCCCC)COP(O)(=O)OCCN	Lipids	Lysophospholipid	Sensitivity	Weighted median	-	-	-	-	-	-	-	-	3	0.99 (0.81-1.22)	0.95932	-	-	-	-	-	-	-
	1-oleoyl-GPE (18:1)	35628	HMDB11506	9547071	-	[H][C@@](O)(COC(=O)CCCCCCC\C=C/CCCCCCCC)COP(O)(=O)OCCN	Lipids	Lysophospholipid	Sensitivity	Weighted mode	-	-	-	-	-	-	-	-	3	1 (0.77-1.29)	0.974617	-	-	-	-	-	-	-
	1-oleoyl-GPI (18:1)*	-	-	-	-	-	Lipids	Lysophospholipid	Primary	Inverse variance weighted (random effects)/ Wald ratio	-	-	-	-	-	-	-	-	1	1 (0.7-1.43)	0.991232	0.999026	-	-	-	-	-	-
	1-oleoylglycerol (18:1)	21184	HMDB11567	5283468	-	[H][C@](O)(CO)COC(=O)CCCCCCC\C=C/CCCCCCCC	Lipids	Monoacylglycerol	Primary	Inverse variance weighted (random effects)/ Wald ratio	-	-	-	-	2	1.03 (0.99-1.07)	0.16493	0.406572	2	0.96 (0.71-1.3)	0.788585	0.994872	2	1.03 (0.99-1.07)	0.179958	0.523879	0	0.652875
	1-oleoylglycerol (18:1)	21184	HMDB11567	5283468	-	[H][C@](O)(CO)COC(=O)CCCCCCC\C=C/CCCCCCCC	Lipids	Monoacylglycerol	Sensitivity	Inverse variance weighted (fixed effects)	-	-	-	-	2	1.03 (0.99-1.07)	0.16493	-	2	0.96 (0.71-1.3)	0.788585	-	-	-	-	-	-	-
	1-oleoylglycerol (18:1)	21184	HMDB11567	5283468	-	[H][C@](O)(CO)COC(=O)CCCCCCC\C=C/CCCCCCCC	Lipids	Monoacylglycerol	Sensitivity	Inverse variance weighted (multiplicative random effects)	-	-	-	-	2	1.03 (1.03-1.03)	9.27692e-125	-	2	0.96 (0.96-0.96)	2.39e-286	-	-	-	-	-	-	-
	1-oleoylglycerophosphocholine	48258	HMDB02815	16081932	C04230	CCCCCCCC\C=C/CCCCCCCC(=O)OC[C@@H](O)COP([O-])(=O)OCC[N+](C)(C)C	Lipids	Lysophospholipid	Primary	Inverse variance weighted (random effects)/ Wald ratio	3	1.06 (0.89-1.27)	0.497703	0.863348	1	1.05 (0.99-1.11)	0.108961	0.3456	-	-	-	-	2	1.05 (0.99-1.11)	0.0832988	0.303115	0	0.863388
	1-oleoylglycerophosphocholine	48258	HMDB02815	16081932	C04230	CCCCCCCC\C=C/CCCCCCCC(=O)OC[C@@H](O)COP([O-])(=O)OCC[N+](C)(C)C	Lipids	Lysophospholipid	Sensitivity	Inverse variance weighted (fixed effects)	3	1.06 (0.97-1.16)	0.176991	-	-	-	-	-	-	-	-	-	-	-	-	-	-	-
	1-oleoylglycerophosphocholine	48258	HMDB02815	16081932	C04230	CCCCCCCC\C=C/CCCCCCCC(=O)OC[C@@H](O)COP([O-])(=O)OCC[N+](C)(C)C	Lipids	Lysophospholipid	Sensitivity	Inverse variance weighted (multiplicative random effects)	3	1.06 (0.89-1.27)	0.497703	-	-	-	-	-	-	-	-	-	-	-	-	-	-	-
	1-oleoylglycerophosphocholine	48258	HMDB02815	16081932	C04230	CCCCCCCC\C=C/CCCCCCCC(=O)OC[C@@H](O)COP([O-])(=O)OCC[N+](C)(C)C	Lipids	Lysophospholipid	Sensitivity	MR Egger	3	0.98 (0.44-2.2)	0.972714	-	-	-	-	-	-	-	-	-	-	-	-	-	-	-
	1-oleoylglycerophosphocholine	48258	HMDB02815	16081932	C04230	CCCCCCCC\C=C/CCCCCCCC(=O)OC[C@@H](O)COP([O-])(=O)OCC[N+](C)(C)C	Lipids	Lysophospholipid	Sensitivity	Weighted median	3	1.03 (0.91-1.17)	0.630754	-	-	-	-	-	-	-	-	-	-	-	-	-	-	-
	1-oleoylglycerophosphocholine	48258	HMDB02815	16081932	C04230	CCCCCCCC\C=C/CCCCCCCC(=O)OC[C@@H](O)COP([O-])(=O)OCC[N+](C)(C)C	Lipids	Lysophospholipid	Sensitivity	Weighted mode	3	1 (0.85-1.19)	0.976791	-	-	-	-	-	-	-	-	-	-	-	-	-	-	-
	1-palmitoleoyl-2-linolenoyl-GPC (16:1/18:3)*	53180	HMDB08008	52922452	C00157	CCCCCC\C=C/CCCCCCCC(=O)OC[C@]([H])(COP([O-])(=O)OCC[N+](C)(C)C)OC(=O)CCCCCCC\C=C/C\C=C/C\C=C/CC	Lipids	Phosphatidylcholine (PC)	Primary	Inverse variance weighted (random effects)/ Wald ratio	-	-	-	-	-	-	-	-	6	0.76 (0.66-0.88)	0.000190988	0.00429723	-	-	-	-	-	-
	1-palmitoleoyl-2-linolenoyl-GPC (16:1/18:3)*	53180	HMDB08008	52922452	C00157	CCCCCC\C=C/CCCCCCCC(=O)OC[C@]([H])(COP([O-])(=O)OCC[N+](C)(C)C)OC(=O)CCCCCCC\C=C/C\C=C/C\C=C/CC	Lipids	Phosphatidylcholine (PC)	Sensitivity	Inverse variance weighted (fixed effects)	-	-	-	-	-	-	-	-	6	0.76 (0.66-0.88)	0.000190988	-	-	-	-	-	-	-
	1-palmitoleoyl-2-linolenoyl-GPC (16:1/18:3)*	53180	HMDB08008	52922452	C00157	CCCCCC\C=C/CCCCCCCC(=O)OC[C@]([H])(COP([O-])(=O)OCC[N+](C)(C)C)OC(=O)CCCCCCC\C=C/C\C=C/C\C=C/CC	Lipids	Phosphatidylcholine (PC)	Sensitivity	Inverse variance weighted (multiplicative random effects)	-	-	-	-	-	-	-	-	6	0.76 (0.67-0.86)	1.55e-05	-	-	-	-	-	-	-
	1-palmitoleoyl-2-linolenoyl-GPC (16:1/18:3)*	53180	HMDB08008	52922452	C00157	CCCCCC\C=C/CCCCCCCC(=O)OC[C@]([H])(COP([O-])(=O)OCC[N+](C)(C)C)OC(=O)CCCCCCC\C=C/C\C=C/C\C=C/CC	Lipids	Phosphatidylcholine (PC)	Sensitivity	MR Egger	-	-	-	-	-	-	-	-	6	0.92 (0.5-1.69)	0.805551	-	-	-	-	-	-	-
	1-palmitoleoyl-2-linolenoyl-GPC (16:1/18:3)*	53180	HMDB08008	52922452	C00157	CCCCCC\C=C/CCCCCCCC(=O)OC[C@]([H])(COP([O-])(=O)OCC[N+](C)(C)C)OC(=O)CCCCCCC\C=C/C\C=C/C\C=C/CC	Lipids	Phosphatidylcholine (PC)	Sensitivity	Weighted median	-	-	-	-	-	-	-	-	6	0.8 (0.67-0.96)	0.0163103	-	-	-	-	-	-	-
	1-palmitoleoyl-2-linolenoyl-GPC (16:1/18:3)*	53180	HMDB08008	52922452	C00157	CCCCCC\C=C/CCCCCCCC(=O)OC[C@]([H])(COP([O-])(=O)OCC[N+](C)(C)C)OC(=O)CCCCCCC\C=C/C\C=C/C\C=C/CC	Lipids	Phosphatidylcholine (PC)	Sensitivity	Weighted mode	-	-	-	-	-	-	-	-	6	0.81 (0.65-1)	0.101629	-	-	-	-	-	-	-
	1-palmitoleoyl-GPC (16:1)*	33230	HMDB10383	24779461	C04230	CCCCCC\C=C/CCCCCCCC(=O)OC[C@@H](O)COP([O-])(=O)OCC[N+](C)(C)C	Lipids	Lysophospholipid	Primary	Inverse variance weighted (random effects)/ Wald ratio	-	-	-	-	-	-	-	-	3	0.62 (0.46-0.86)	0.0034654	0.0519287	-	-	-	-	-	-
	1-palmitoleoyl-GPC (16:1)*	33230	HMDB10383	24779461	C04230	CCCCCC\C=C/CCCCCCCC(=O)OC[C@@H](O)COP([O-])(=O)OCC[N+](C)(C)C	Lipids	Lysophospholipid	Sensitivity	Inverse variance weighted (fixed effects)	-	-	-	-	-	-	-	-	3	0.62 (0.46-0.86)	0.0034654	-	-	-	-	-	-	-
	1-palmitoleoyl-GPC (16:1)*	33230	HMDB10383	24779461	C04230	CCCCCC\C=C/CCCCCCCC(=O)OC[C@@H](O)COP([O-])(=O)OCC[N+](C)(C)C	Lipids	Lysophospholipid	Sensitivity	Inverse variance weighted (multiplicative random effects)	-	-	-	-	-	-	-	-	3	0.62 (0.47-0.83)	0.00095565	-	-	-	-	-	-	-
	1-palmitoleoyl-GPC (16:1)*	33230	HMDB10383	24779461	C04230	CCCCCC\C=C/CCCCCCCC(=O)OC[C@@H](O)COP([O-])(=O)OCC[N+](C)(C)C	Lipids	Lysophospholipid	Sensitivity	MR Egger	-	-	-	-	-	-	-	-	3	585.79 (0.01-39984287.38)	0.463389	-	-	-	-	-	-	-
	1-palmitoleoyl-GPC (16:1)*	33230	HMDB10383	24779461	C04230	CCCCCC\C=C/CCCCCCCC(=O)OC[C@@H](O)COP([O-])(=O)OCC[N+](C)(C)C	Lipids	Lysophospholipid	Sensitivity	Weighted median	-	-	-	-	-	-	-	-	3	0.64 (0.44-0.92)	0.015883	-	-	-	-	-	-	-
	1-palmitoleoyl-GPC (16:1)*	33230	HMDB10383	24779461	C04230	CCCCCC\C=C/CCCCCCCC(=O)OC[C@@H](O)COP([O-])(=O)OCC[N+](C)(C)C	Lipids	Lysophospholipid	Sensitivity	Weighted mode	-	-	-	-	-	-	-	-	3	0.64 (0.41-0.99)	0.180296	-	-	-	-	-	-	-
	1-palmitoyl-2-arachidonoyl-GPC (16:0/20:4n6)	52462	HMDB07982	10747814	C00157	CCCCCCCCCCCCCCCC(=O)OC[C@]([H])(COP([O-])(=O)OCC[N+](C)(C)C)OC(=O)CCC\C=C/C\C=C/C\C=C/C\C=C/CCCCC	Lipids	Phosphatidylcholine (PC)	Primary	Inverse variance weighted (random effects)/ Wald ratio	-	-	-	-	-	-	-	-	137	1.18 (1.14-1.21)	5.39e-31	1.15e-28	-	-	-	-	-	-
	1-palmitoyl-2-arachidonoyl-GPC (16:0/20:4n6)	52462	HMDB07982	10747814	C00157	CCCCCCCCCCCCCCCC(=O)OC[C@]([H])(COP([O-])(=O)OCC[N+](C)(C)C)OC(=O)CCC\C=C/C\C=C/C\C=C/C\C=C/CCCCC	Lipids	Phosphatidylcholine (PC)	Sensitivity	Inverse variance weighted (fixed effects)	-	-	-	-	-	-	-	-	137	1.18 (1.15-1.21)	1.28e-32	-	-	-	-	-	-	-
	1-palmitoyl-2-arachidonoyl-GPC (16:0/20:4n6)	52462	HMDB07982	10747814	C00157	CCCCCCCCCCCCCCCC(=O)OC[C@]([H])(COP([O-])(=O)OCC[N+](C)(C)C)OC(=O)CCC\C=C/C\C=C/C\C=C/C\C=C/CCCCC	Lipids	Phosphatidylcholine (PC)	Sensitivity	Inverse variance weighted (multiplicative random effects)	-	-	-	-	-	-	-	-	137	1.18 (1.14-1.21)	5.39e-31	-	-	-	-	-	-	-
	1-palmitoyl-2-arachidonoyl-GPC (16:0/20:4n6)	52462	HMDB07982	10747814	C00157	CCCCCCCCCCCCCCCC(=O)OC[C@]([H])(COP([O-])(=O)OCC[N+](C)(C)C)OC(=O)CCC\C=C/C\C=C/C\C=C/C\C=C/CCCCC	Lipids	Phosphatidylcholine (PC)	Sensitivity	MR Egger	-	-	-	-	-	-	-	-	137	1.03 (0.95-1.11)	0.519817	-	-	-	-	-	-	-
	1-palmitoyl-2-arachidonoyl-GPC (16:0/20:4n6)	52462	HMDB07982	10747814	C00157	CCCCCCCCCCCCCCCC(=O)OC[C@]([H])(COP([O-])(=O)OCC[N+](C)(C)C)OC(=O)CCC\C=C/C\C=C/C\C=C/C\C=C/CCCCC	Lipids	Phosphatidylcholine (PC)	Sensitivity	Weighted median	-	-	-	-	-	-	-	-	137	1.13 (1.08-1.18)	2.49e-07	-	-	-	-	-	-	-
	1-palmitoyl-2-arachidonoyl-GPC (16:0/20:4n6)	52462	HMDB07982	10747814	C00157	CCCCCCCCCCCCCCCC(=O)OC[C@]([H])(COP([O-])(=O)OCC[N+](C)(C)C)OC(=O)CCC\C=C/C\C=C/C\C=C/C\C=C/CCCCC	Lipids	Phosphatidylcholine (PC)	Sensitivity	Weighted mode	-	-	-	-	-	-	-	-	137	1.09 (1.02-1.16)	0.00918168	-	-	-	-	-	-	-
	1-palmitoyl-2-arachidonoyl-GPE (16:0/20:4)*	52464	HMDB05323	9546800	C00350	[H][C@@](COC(=O)CCCCCCCCCCCCCCC)(COP(O)(=O)OCCN)OC(=O)CCC\C=C/C\C=C/C\C=C/C\C=C/CCCCC	Lipids	Phosphatidylethanolamine (PE)	Primary	Inverse variance weighted (random effects)/ Wald ratio	-	-	-	-	-	-	-	-	22	0.99 (0.92-1.07)	0.797446	0.994872	-	-	-	-	-	-
	1-palmitoyl-2-arachidonoyl-GPE (16:0/20:4)*	52464	HMDB05323	9546800	C00350	[H][C@@](COC(=O)CCCCCCCCCCCCCCC)(COP(O)(=O)OCCN)OC(=O)CCC\C=C/C\C=C/C\C=C/C\C=C/CCCCC	Lipids	Phosphatidylethanolamine (PE)	Sensitivity	Inverse variance weighted (fixed effects)	-	-	-	-	-	-	-	-	22	0.99 (0.92-1.07)	0.797446	-	-	-	-	-	-	-
	1-palmitoyl-2-arachidonoyl-GPE (16:0/20:4)*	52464	HMDB05323	9546800	C00350	[H][C@@](COC(=O)CCCCCCCCCCCCCCC)(COP(O)(=O)OCCN)OC(=O)CCC\C=C/C\C=C/C\C=C/C\C=C/CCCCC	Lipids	Phosphatidylethanolamine (PE)	Sensitivity	Inverse variance weighted (multiplicative random effects)	-	-	-	-	-	-	-	-	22	0.99 (0.92-1.07)	0.796613	-	-	-	-	-	-	-
	1-palmitoyl-2-arachidonoyl-GPE (16:0/20:4)*	52464	HMDB05323	9546800	C00350	[H][C@@](COC(=O)CCCCCCCCCCCCCCC)(COP(O)(=O)OCCN)OC(=O)CCC\C=C/C\C=C/C\C=C/C\C=C/CCCCC	Lipids	Phosphatidylethanolamine (PE)	Sensitivity	MR Egger	-	-	-	-	-	-	-	-	22	0.97 (0.78-1.21)	0.805604	-	-	-	-	-	-	-
	1-palmitoyl-2-arachidonoyl-GPE (16:0/20:4)*	52464	HMDB05323	9546800	C00350	[H][C@@](COC(=O)CCCCCCCCCCCCCCC)(COP(O)(=O)OCCN)OC(=O)CCC\C=C/C\C=C/C\C=C/C\C=C/CCCCC	Lipids	Phosphatidylethanolamine (PE)	Sensitivity	Weighted median	-	-	-	-	-	-	-	-	22	1.02 (0.92-1.14)	0.705407	-	-	-	-	-	-	-
	1-palmitoyl-2-arachidonoyl-GPE (16:0/20:4)*	52464	HMDB05323	9546800	C00350	[H][C@@](COC(=O)CCCCCCCCCCCCCCC)(COP(O)(=O)OCCN)OC(=O)CCC\C=C/C\C=C/C\C=C/C\C=C/CCCCC	Lipids	Phosphatidylethanolamine (PE)	Sensitivity	Weighted mode	-	-	-	-	-	-	-	-	22	1.02 (0.91-1.15)	0.740922	-	-	-	-	-	-	-
	1-palmitoyl-2-arachidonoyl-GPI (16:0/20:4)*	52467	HMDB09789	52928411	-	CCCCCCCCCCCCCCCC(=O)OC[C@H](COP(O)(=O)O[C@H]1[C@H](O)[C@@H](O)[C@H](O)[C@@H](O)[C@H]1O)OC(=O)CCC\C=C/C\C=C/C\C=C/C\C=C/CCCCC	Lipids	Phosphatidylinositol (PI)	Primary	Inverse variance weighted (random effects)/ Wald ratio	-	-	-	-	-	-	-	-	2	1.17 (0.86-1.59)	0.315917	0.888518	-	-	-	-	-	-
	1-palmitoyl-2-arachidonoyl-GPI (16:0/20:4)*	52467	HMDB09789	52928411	-	CCCCCCCCCCCCCCCC(=O)OC[C@H](COP(O)(=O)O[C@H]1[C@H](O)[C@@H](O)[C@H](O)[C@@H](O)[C@H]1O)OC(=O)CCC\C=C/C\C=C/C\C=C/C\C=C/CCCCC	Lipids	Phosphatidylinositol (PI)	Sensitivity	Inverse variance weighted (fixed effects)	-	-	-	-	-	-	-	-	2	1.17 (0.89-1.53)	0.253481	-	-	-	-	-	-	-
	1-palmitoyl-2-arachidonoyl-GPI (16:0/20:4)*	52467	HMDB09789	52928411	-	CCCCCCCCCCCCCCCC(=O)OC[C@H](COP(O)(=O)O[C@H]1[C@H](O)[C@@H](O)[C@H](O)[C@@H](O)[C@H]1O)OC(=O)CCC\C=C/C\C=C/C\C=C/C\C=C/CCCCC	Lipids	Phosphatidylinositol (PI)	Sensitivity	Inverse variance weighted (multiplicative random effects)	-	-	-	-	-	-	-	-	2	1.17 (0.86-1.59)	0.315917	-	-	-	-	-	-	-
	1-palmitoyl-2-linoleoyl-GPC (16:0/18:2)	42446	HMDB07973	5287971	C00157	[H][C@@](COC(=O)CCCCCCCCCCCCCCC)(COP([O-])(=O)OCC[N+](C)(C)C)OC(=O)CCCCCCC\C=C/C\C=C/CCCCC	Lipids	Phosphatidylcholine (PC)	Primary	Inverse variance weighted (random effects)/ Wald ratio	-	-	-	-	-	-	-	-	7	0.85 (0.75-0.98)	0.0238513	0.181637	-	-	-	-	-	-
	1-palmitoyl-2-linoleoyl-GPC (16:0/18:2)	42446	HMDB07973	5287971	C00157	[H][C@@](COC(=O)CCCCCCCCCCCCCCC)(COP([O-])(=O)OCC[N+](C)(C)C)OC(=O)CCCCCCC\C=C/C\C=C/CCCCC	Lipids	Phosphatidylcholine (PC)	Sensitivity	Inverse variance weighted (fixed effects)	-	-	-	-	-	-	-	-	7	0.85 (0.75-0.98)	0.0238513	-	-	-	-	-	-	-
	1-palmitoyl-2-linoleoyl-GPC (16:0/18:2)	42446	HMDB07973	5287971	C00157	[H][C@@](COC(=O)CCCCCCCCCCCCCCC)(COP([O-])(=O)OCC[N+](C)(C)C)OC(=O)CCCCCCC\C=C/C\C=C/CCCCC	Lipids	Phosphatidylcholine (PC)	Sensitivity	Inverse variance weighted (multiplicative random effects)	-	-	-	-	-	-	-	-	7	0.85 (0.77-0.95)	0.00269778	-	-	-	-	-	-	-
	1-palmitoyl-2-linoleoyl-GPC (16:0/18:2)	42446	HMDB07973	5287971	C00157	[H][C@@](COC(=O)CCCCCCCCCCCCCCC)(COP([O-])(=O)OCC[N+](C)(C)C)OC(=O)CCCCCCC\C=C/C\C=C/CCCCC	Lipids	Phosphatidylcholine (PC)	Sensitivity	MR Egger	-	-	-	-	-	-	-	-	7	0.74 (0.42-1.31)	0.35456	-	-	-	-	-	-	-
	1-palmitoyl-2-linoleoyl-GPC (16:0/18:2)	42446	HMDB07973	5287971	C00157	[H][C@@](COC(=O)CCCCCCCCCCCCCCC)(COP([O-])(=O)OCC[N+](C)(C)C)OC(=O)CCCCCCC\C=C/C\C=C/CCCCC	Lipids	Phosphatidylcholine (PC)	Sensitivity	Weighted median	-	-	-	-	-	-	-	-	7	0.85 (0.71-1.01)	0.0698128	-	-	-	-	-	-	-
	1-palmitoyl-2-linoleoyl-GPC (16:0/18:2)	42446	HMDB07973	5287971	C00157	[H][C@@](COC(=O)CCCCCCCCCCCCCCC)(COP([O-])(=O)OCC[N+](C)(C)C)OC(=O)CCCCCCC\C=C/C\C=C/CCCCC	Lipids	Phosphatidylcholine (PC)	Sensitivity	Weighted mode	-	-	-	-	-	-	-	-	7	0.84 (0.69-1.03)	0.148548	-	-	-	-	-	-	-
	1-palmitoyl-2-linoleoyl-GPE (16:0/18:2)	42449	HMDB05322	9546747	C00350	[H][C@@](COC(=O)CCCCCCCCCCCCCCC)(COP(O)(=O)OCCN)OC(=O)CCCCCCC\C=C/C\C=C/CCCCC	Lipids	Phosphatidylethanolamine (PE)	Primary	Inverse variance weighted (random effects)/ Wald ratio	-	-	-	-	-	-	-	-	44	0.89 (0.84-0.94)	9.48e-06	0.000360969	-	-	-	-	-	-
	1-palmitoyl-2-linoleoyl-GPE (16:0/18:2)	42449	HMDB05322	9546747	C00350	[H][C@@](COC(=O)CCCCCCCCCCCCCCC)(COP(O)(=O)OCCN)OC(=O)CCCCCCC\C=C/C\C=C/CCCCC	Lipids	Phosphatidylethanolamine (PE)	Sensitivity	Inverse variance weighted (fixed effects)	-	-	-	-	-	-	-	-	44	0.89 (0.84-0.94)	9.48e-06	-	-	-	-	-	-	-
	1-palmitoyl-2-linoleoyl-GPE (16:0/18:2)	42449	HMDB05322	9546747	C00350	[H][C@@](COC(=O)CCCCCCCCCCCCCCC)(COP(O)(=O)OCCN)OC(=O)CCCCCCC\C=C/C\C=C/CCCCC	Lipids	Phosphatidylethanolamine (PE)	Sensitivity	Inverse variance weighted (multiplicative random effects)	-	-	-	-	-	-	-	-	44	0.89 (0.84-0.94)	7.89e-06	-	-	-	-	-	-	-
	1-palmitoyl-2-linoleoyl-GPE (16:0/18:2)	42449	HMDB05322	9546747	C00350	[H][C@@](COC(=O)CCCCCCCCCCCCCCC)(COP(O)(=O)OCCN)OC(=O)CCCCCCC\C=C/C\C=C/CCCCC	Lipids	Phosphatidylethanolamine (PE)	Sensitivity	MR Egger	-	-	-	-	-	-	-	-	44	1.06 (0.88-1.27)	0.563445	-	-	-	-	-	-	-
	1-palmitoyl-2-linoleoyl-GPE (16:0/18:2)	42449	HMDB05322	9546747	C00350	[H][C@@](COC(=O)CCCCCCCCCCCCCCC)(COP(O)(=O)OCCN)OC(=O)CCCCCCC\C=C/C\C=C/CCCCC	Lipids	Phosphatidylethanolamine (PE)	Sensitivity	Weighted median	-	-	-	-	-	-	-	-	44	0.89 (0.82-0.97)	0.00508534	-	-	-	-	-	-	-
	1-palmitoyl-2-linoleoyl-GPE (16:0/18:2)	42449	HMDB05322	9546747	C00350	[H][C@@](COC(=O)CCCCCCCCCCCCCCC)(COP(O)(=O)OCCN)OC(=O)CCCCCCC\C=C/C\C=C/CCCCC	Lipids	Phosphatidylethanolamine (PE)	Sensitivity	Weighted mode	-	-	-	-	-	-	-	-	44	0.91 (0.82-1.01)	0.0799145	-	-	-	-	-	-	-
	1-palmitoyl-2-linoleoyl-GPI (16:0/18:2)	52450	HMDB09784	46891796	-	CCCCCCCCCCCCCCCC(=O)OC[C@H](COP(O)(=O)O[C@H]1[C@H](O)[C@@H](O)[C@H](O)[C@@H](O)[C@H]1O)OC(=O)CCCCCCC\C=C/C\C=C/CCCCC	Lipids	Phosphatidylinositol (PI)	Primary	Inverse variance weighted (random effects)/ Wald ratio	-	-	-	-	-	-	-	-	3	0.9 (0.71-1.14)	0.371305	0.963454	-	-	-	-	-	-
	1-palmitoyl-2-linoleoyl-GPI (16:0/18:2)	52450	HMDB09784	46891796	-	CCCCCCCCCCCCCCCC(=O)OC[C@H](COP(O)(=O)O[C@H]1[C@H](O)[C@@H](O)[C@H](O)[C@@H](O)[C@H]1O)OC(=O)CCCCCCC\C=C/C\C=C/CCCCC	Lipids	Phosphatidylinositol (PI)	Sensitivity	Inverse variance weighted (fixed effects)	-	-	-	-	-	-	-	-	3	0.9 (0.71-1.14)	0.371305	-	-	-	-	-	-	-
	1-palmitoyl-2-linoleoyl-GPI (16:0/18:2)	52450	HMDB09784	46891796	-	CCCCCCCCCCCCCCCC(=O)OC[C@H](COP(O)(=O)O[C@H]1[C@H](O)[C@@H](O)[C@H](O)[C@@H](O)[C@H]1O)OC(=O)CCCCCCC\C=C/C\C=C/CCCCC	Lipids	Phosphatidylinositol (PI)	Sensitivity	Inverse variance weighted (multiplicative random effects)	-	-	-	-	-	-	-	-	3	0.9 (0.71-1.13)	0.3581	-	-	-	-	-	-	-
	1-palmitoyl-2-linoleoyl-GPI (16:0/18:2)	52450	HMDB09784	46891796	-	CCCCCCCCCCCCCCCC(=O)OC[C@H](COP(O)(=O)O[C@H]1[C@H](O)[C@@H](O)[C@H](O)[C@@H](O)[C@H]1O)OC(=O)CCCCCCC\C=C/C\C=C/CCCCC	Lipids	Phosphatidylinositol (PI)	Sensitivity	MR Egger	-	-	-	-	-	-	-	-	3	1.44 (0.53-3.95)	0.605993	-	-	-	-	-	-	-
	1-palmitoyl-2-linoleoyl-GPI (16:0/18:2)	52450	HMDB09784	46891796	-	CCCCCCCCCCCCCCCC(=O)OC[C@H](COP(O)(=O)O[C@H]1[C@H](O)[C@@H](O)[C@H](O)[C@@H](O)[C@H]1O)OC(=O)CCCCCCC\C=C/C\C=C/CCCCC	Lipids	Phosphatidylinositol (PI)	Sensitivity	Weighted median	-	-	-	-	-	-	-	-	3	0.98 (0.74-1.31)	0.910089	-	-	-	-	-	-	-
	1-palmitoyl-2-linoleoyl-GPI (16:0/18:2)	52450	HMDB09784	46891796	-	CCCCCCCCCCCCCCCC(=O)OC[C@H](COP(O)(=O)O[C@H]1[C@H](O)[C@@H](O)[C@H](O)[C@@H](O)[C@H]1O)OC(=O)CCCCCCC\C=C/C\C=C/CCCCC	Lipids	Phosphatidylinositol (PI)	Sensitivity	Weighted mode	-	-	-	-	-	-	-	-	3	1.01 (0.71-1.42)	0.978564	-	-	-	-	-	-	-
	1-palmitoyl-2-oleoyl-GPC (16:0/18:1)	52461	HMDB07972	6436017	C00157	[H][C@@](COC(=O)CCCCCCCCCCCCCCC)(COP([O-])(=O)OCC[N+](C)(C)C)OC(=O)CCCCCCC\C=C/CCCCCCCC	Lipids	Phosphatidylcholine (PC)	Primary	Inverse variance weighted (random effects)/ Wald ratio	-	-	-	-	-	-	-	-	1	1.1 (0.71-1.68)	0.676998	0.994872	-	-	-	-	-	-
	1-palmitoyl-2-oleoyl-GPE (16:0/18:1)	19263	HMDB05320	5283496	C00350	[H][C@@](COC(=O)CCCCCCCCCCCCCCC)(COP(O)(=O)OCCN)OC(=O)CCCCCCC\C=C/CCCCCCCC	Lipids	Phosphatidylethanolamine (PE)	Primary	Inverse variance weighted (random effects)/ Wald ratio	-	-	-	-	-	-	-	-	4	0.98 (0.84-1.13)	0.755719	0.994872	-	-	-	-	-	-
	1-palmitoyl-2-oleoyl-GPE (16:0/18:1)	19263	HMDB05320	5283496	C00350	[H][C@@](COC(=O)CCCCCCCCCCCCCCC)(COP(O)(=O)OCCN)OC(=O)CCCCCCC\C=C/CCCCCCCC	Lipids	Phosphatidylethanolamine (PE)	Sensitivity	Inverse variance weighted (fixed effects)	-	-	-	-	-	-	-	-	4	0.98 (0.85-1.12)	0.747389	-	-	-	-	-	-	-
	1-palmitoyl-2-oleoyl-GPE (16:0/18:1)	19263	HMDB05320	5283496	C00350	[H][C@@](COC(=O)CCCCCCCCCCCCCCC)(COP(O)(=O)OCCN)OC(=O)CCCCCCC\C=C/CCCCCCCC	Lipids	Phosphatidylethanolamine (PE)	Sensitivity	Inverse variance weighted (multiplicative random effects)	-	-	-	-	-	-	-	-	4	0.98 (0.84-1.13)	0.755719	-	-	-	-	-	-	-
	1-palmitoyl-2-oleoyl-GPE (16:0/18:1)	19263	HMDB05320	5283496	C00350	[H][C@@](COC(=O)CCCCCCCCCCCCCCC)(COP(O)(=O)OCCN)OC(=O)CCCCCCC\C=C/CCCCCCCC	Lipids	Phosphatidylethanolamine (PE)	Sensitivity	MR Egger	-	-	-	-	-	-	-	-	4	1.69 (0.89-3.21)	0.251676	-	-	-	-	-	-	-
	1-palmitoyl-2-oleoyl-GPE (16:0/18:1)	19263	HMDB05320	5283496	C00350	[H][C@@](COC(=O)CCCCCCCCCCCCCCC)(COP(O)(=O)OCCN)OC(=O)CCCCCCC\C=C/CCCCCCCC	Lipids	Phosphatidylethanolamine (PE)	Sensitivity	Weighted median	-	-	-	-	-	-	-	-	4	1.02 (0.87-1.19)	0.829869	-	-	-	-	-	-	-
	1-palmitoyl-2-oleoyl-GPE (16:0/18:1)	19263	HMDB05320	5283496	C00350	[H][C@@](COC(=O)CCCCCCCCCCCCCCC)(COP(O)(=O)OCCN)OC(=O)CCCCCCC\C=C/CCCCCCCC	Lipids	Phosphatidylethanolamine (PE)	Sensitivity	Weighted mode	-	-	-	-	-	-	-	-	4	1.02 (0.86-1.21)	0.86566	-	-	-	-	-	-	-
	1-palmitoyl-2-oleoyl-GPI (16:0/18:1)*	52669	HMDB09783	5771758	-	[H][C@@](COC(=O)CCCCCCCCCCCCCCC)(COP(O)(=O)O[C@H]1C(O)C(O)C(O)[C@@H](O)C1O)OC(=O)CCCCCCC\C=C/CCCCCCCC	Lipids	Phosphatidylinositol (PI)	Primary	Inverse variance weighted (random effects)/ Wald ratio	-	-	-	-	-	-	-	-	3	1.05 (0.84-1.31)	0.6938	0.994872	-	-	-	-	-	-
	1-palmitoyl-2-oleoyl-GPI (16:0/18:1)*	52669	HMDB09783	5771758	-	[H][C@@](COC(=O)CCCCCCCCCCCCCCC)(COP(O)(=O)O[C@H]1C(O)C(O)C(O)[C@@H](O)C1O)OC(=O)CCCCCCC\C=C/CCCCCCCC	Lipids	Phosphatidylinositol (PI)	Sensitivity	Inverse variance weighted (fixed effects)	-	-	-	-	-	-	-	-	3	1.05 (0.84-1.31)	0.6938	-	-	-	-	-	-	-
	1-palmitoyl-2-oleoyl-GPI (16:0/18:1)*	52669	HMDB09783	5771758	-	[H][C@@](COC(=O)CCCCCCCCCCCCCCC)(COP(O)(=O)O[C@H]1C(O)C(O)C(O)[C@@H](O)C1O)OC(=O)CCCCCCC\C=C/CCCCCCCC	Lipids	Phosphatidylinositol (PI)	Sensitivity	Inverse variance weighted (multiplicative random effects)	-	-	-	-	-	-	-	-	3	1.05 (1.01-1.08)	0.011597	-	-	-	-	-	-	-
	1-palmitoyl-2-oleoyl-GPI (16:0/18:1)*	52669	HMDB09783	5771758	-	[H][C@@](COC(=O)CCCCCCCCCCCCCCC)(COP(O)(=O)O[C@H]1C(O)C(O)C(O)[C@@H](O)C1O)OC(=O)CCCCCCC\C=C/CCCCCCCC	Lipids	Phosphatidylinositol (PI)	Sensitivity	MR Egger	-	-	-	-	-	-	-	-	3	1 (0.01-116.82)	0.999105	-	-	-	-	-	-	-
	1-palmitoyl-2-oleoyl-GPI (16:0/18:1)*	52669	HMDB09783	5771758	-	[H][C@@](COC(=O)CCCCCCCCCCCCCCC)(COP(O)(=O)O[C@H]1C(O)C(O)C(O)[C@@H](O)C1O)OC(=O)CCCCCCC\C=C/CCCCCCCC	Lipids	Phosphatidylinositol (PI)	Sensitivity	Weighted median	-	-	-	-	-	-	-	-	3	1.04 (0.82-1.33)	0.728347	-	-	-	-	-	-	-
	1-palmitoyl-2-oleoyl-GPI (16:0/18:1)*	52669	HMDB09783	5771758	-	[H][C@@](COC(=O)CCCCCCCCCCCCCCC)(COP(O)(=O)O[C@H]1C(O)C(O)C(O)[C@@H](O)C1O)OC(=O)CCCCCCC\C=C/CCCCCCCC	Lipids	Phosphatidylinositol (PI)	Sensitivity	Weighted mode	-	-	-	-	-	-	-	-	3	1.03 (0.77-1.38)	0.848313	-	-	-	-	-	-	-
	1-palmitoyl-2-palmitoleoyl-GPC (16:0/16:1)*	52470	HMDB07969	6443788	C00157	CCCCCCCCCCCCCCCC(=O)OC[C@]([H])(COP([O-])(=O)OCC[N+](C)(C)C)OC(=O)CCCCCCC\C=C/CCCCCC	Lipids	Phosphatidylcholine (PC)	Primary	Inverse variance weighted (random effects)/ Wald ratio	-	-	-	-	-	-	-	-	1	0.72 (0.47-1.13)	0.154404	0.6257	-	-	-	-	-	-
	1-palmitoyl-2-stearoyl-GPC (16:0/18:0)	52616	HMDB07970	24778686	C00157	[H][C@@](COC(=O)CCCCCCCCCCCCCCC)(COP([O-])(=O)OCC[N+](C)(C)C)OC(=O)CCCCCCCCCCCCCCCCC	Lipids	Phosphatidylcholine (PC)	Primary	Inverse variance weighted (random effects)/ Wald ratio	-	-	-	-	-	-	-	-	8	1.23 (1.07-1.4)	0.00305841	0.0493855	-	-	-	-	-	-
	1-palmitoyl-2-stearoyl-GPC (16:0/18:0)	52616	HMDB07970	24778686	C00157	[H][C@@](COC(=O)CCCCCCCCCCCCCCC)(COP([O-])(=O)OCC[N+](C)(C)C)OC(=O)CCCCCCCCCCCCCCCCC	Lipids	Phosphatidylcholine (PC)	Sensitivity	Inverse variance weighted (fixed effects)	-	-	-	-	-	-	-	-	8	1.23 (1.07-1.4)	0.00305841	-	-	-	-	-	-	-
	1-palmitoyl-2-stearoyl-GPC (16:0/18:0)	52616	HMDB07970	24778686	C00157	[H][C@@](COC(=O)CCCCCCCCCCCCCCC)(COP([O-])(=O)OCC[N+](C)(C)C)OC(=O)CCCCCCCCCCCCCCCCC	Lipids	Phosphatidylcholine (PC)	Sensitivity	Inverse variance weighted (multiplicative random effects)	-	-	-	-	-	-	-	-	8	1.23 (1.13-1.33)	1.05e-06	-	-	-	-	-	-	-
	1-palmitoyl-2-stearoyl-GPC (16:0/18:0)	52616	HMDB07970	24778686	C00157	[H][C@@](COC(=O)CCCCCCCCCCCCCCC)(COP([O-])(=O)OCC[N+](C)(C)C)OC(=O)CCCCCCCCCCCCCCCCC	Lipids	Phosphatidylcholine (PC)	Sensitivity	MR Egger	-	-	-	-	-	-	-	-	8	1.28 (0.69-2.37)	0.466848	-	-	-	-	-	-	-
	1-palmitoyl-2-stearoyl-GPC (16:0/18:0)	52616	HMDB07970	24778686	C00157	[H][C@@](COC(=O)CCCCCCCCCCCCCCC)(COP([O-])(=O)OCC[N+](C)(C)C)OC(=O)CCCCCCCCCCCCCCCCC	Lipids	Phosphatidylcholine (PC)	Sensitivity	Weighted median	-	-	-	-	-	-	-	-	8	1.26 (1.07-1.49)	0.00717939	-	-	-	-	-	-	-
	1-palmitoyl-2-stearoyl-GPC (16:0/18:0)	52616	HMDB07970	24778686	C00157	[H][C@@](COC(=O)CCCCCCCCCCCCCCC)(COP([O-])(=O)OCC[N+](C)(C)C)OC(=O)CCCCCCCCCCCCCCCCC	Lipids	Phosphatidylcholine (PC)	Sensitivity	Weighted mode	-	-	-	-	-	-	-	-	8	1.26 (1-1.59)	0.0928359	-	-	-	-	-	-	-
	1-palmitoyl-GPC (16:0)	33955	HMDB10382	86554	C04230	CCCCCCCCCCCCCCCC(=O)OC[C@@H](O)COP([O-])(=O)OCC[N+](C)(C)C	Lipids	Lysophospholipid	Primary	Inverse variance weighted (random effects)/ Wald ratio	-	-	-	-	-	-	-	-	2	0.72 (0.41-1.27)	0.253961	0.805839	-	-	-	-	-	-
	1-palmitoyl-GPC (16:0)	33955	HMDB10382	86554	C04230	CCCCCCCCCCCCCCCC(=O)OC[C@@H](O)COP([O-])(=O)OCC[N+](C)(C)C	Lipids	Lysophospholipid	Sensitivity	Inverse variance weighted (fixed effects)	-	-	-	-	-	-	-	-	2	0.72 (0.53-0.97)	0.0314321	-	-	-	-	-	-	-
	1-palmitoyl-GPC (16:0)	33955	HMDB10382	86554	C04230	CCCCCCCCCCCCCCCC(=O)OC[C@@H](O)COP([O-])(=O)OCC[N+](C)(C)C	Lipids	Lysophospholipid	Sensitivity	Inverse variance weighted (multiplicative random effects)	-	-	-	-	-	-	-	-	2	0.72 (0.41-1.27)	0.253961	-	-	-	-	-	-	-
	1-palmitoyl-GPE (16:0)	35631	HMDB11503	9547069	-	[H][C@@](O)(COC(=O)CCCCCCCCCCCCCCC)COP(O)(=O)OCCN	Lipids	Lysophospholipid	Primary	Inverse variance weighted (random effects)/ Wald ratio	4	0.97 (0.91-1.04)	0.381348	0.863252	3	1.01 (0.99-1.03)	0.446097	0.801463	12	1 (0.9-1.11)	0.997976	0.999026	3	1 (0.98-1.03)	0.696255	0.886217	0	0.550334
	1-palmitoyl-GPE (16:0)	35631	HMDB11503	9547069	-	[H][C@@](O)(COC(=O)CCCCCCCCCCCCCCC)COP(O)(=O)OCCN	Lipids	Lysophospholipid	Sensitivity	Inverse variance weighted (fixed effects)	4	0.97 (0.91-1.04)	0.381348	-	3	1.01 (0.99-1.03)	0.446097	-	12	1 (0.9-1.11)	0.997976	-	-	-	-	-	-	-
	1-palmitoyl-GPE (16:0)	35631	HMDB11503	9547069	-	[H][C@@](O)(COC(=O)CCCCCCCCCCCCCCC)COP(O)(=O)OCCN	Lipids	Lysophospholipid	Sensitivity	Inverse variance weighted (multiplicative random effects)	4	0.97 (0.95-1)	0.0333272	-	3	1.01 (0.99-1.03)	0.391113	-	12	1 (0.9-1.11)	0.997973	-	-	-	-	-	-	-
	1-palmitoyl-GPE (16:0)	35631	HMDB11503	9547069	-	[H][C@@](O)(COC(=O)CCCCCCCCCCCCCCC)COP(O)(=O)OCCN	Lipids	Lysophospholipid	Sensitivity	MR Egger	4	0.9 (0.33-2.46)	0.860268	-	3	0.93 (0.76-1.13)	0.596743	-	12	1.25 (0.87-1.78)	0.257688	-	-	-	-	-	-	-
	1-palmitoyl-GPE (16:0)	35631	HMDB11503	9547069	-	[H][C@@](O)(COC(=O)CCCCCCCCCCCCCCC)COP(O)(=O)OCCN	Lipids	Lysophospholipid	Sensitivity	Weighted median	4	0.97 (0.91-1.04)	0.446596	-	3	1.01 (0.98-1.03)	0.728779	-	12	1.02 (0.89-1.18)	0.733502	-	-	-	-	-	-	-
	1-palmitoyl-GPE (16:0)	35631	HMDB11503	9547069	-	[H][C@@](O)(COC(=O)CCCCCCCCCCCCCCC)COP(O)(=O)OCCN	Lipids	Lysophospholipid	Sensitivity	Weighted mode	4	0.97 (0.88-1.07)	0.626825	-	3	1 (0.97-1.03)	0.994609	-	12	1.02 (0.86-1.21)	0.806969	-	-	-	-	-	-	-
	1-palmitoyl-GPG (16:0)*	45970	-	3300276	-	-	Lipids	Lysophospholipid	Primary	Inverse variance weighted (random effects)/ Wald ratio	-	-	-	-	-	-	-	-	2	0.99 (0.72-1.37)	0.958146	0.999026	-	-	-	-	-	-
	1-palmitoyl-GPG (16:0)*	45970	-	3300276	-	-	Lipids	Lysophospholipid	Sensitivity	Inverse variance weighted (fixed effects)	-	-	-	-	-	-	-	-	2	0.99 (0.72-1.37)	0.958146	-	-	-	-	-	-	-
	1-palmitoyl-GPG (16:0)*	45970	-	3300276	-	-	Lipids	Lysophospholipid	Sensitivity	Inverse variance weighted (multiplicative random effects)	-	-	-	-	-	-	-	-	2	0.99 (0.92-1.07)	0.822896	-	-	-	-	-	-	-
	1-palmitoyl-GPI (16:0)	35305	HMDB61695	-		-	Lipids	Lysophospholipid	Primary	Inverse variance weighted (random effects)/ Wald ratio	1	1.09 (0.94-1.27)	0.251134	0.863252	-	-	-	-	1	1 (0.67-1.49)	0.99564	0.999026	2	1.08 (0.94-1.25)	0.28302	0.640985	0	0.685108
	1-palmitoylglycerol (1-monopalmitin)	-	-	-	-	-	Lipids	Monoacylglycerol	Primary	Inverse variance weighted (random effects)/ Wald ratio	1	1.13 (0.97-1.3)	0.106874	0.863252	-	-	-	-	-	-	-	-	-	-	-	-	-	-
	1-stearoyl-2-arachidonoyl-GPC (18:0/20:4)	42450	HMDB08048	16219824	C00157	CCCCCCCCCCCCCCCCCC(=O)OC[C@]([H])(COP([O-])(=O)OCC[N+](C)(C)C)OC(=O)CCC\C=C/C\C=C/C\C=C/C\C=C/CCCCC	Lipids	Phosphatidylcholine (PC)	Primary	Inverse variance weighted (random effects)/ Wald ratio	-	-	-	-	-	-	-	-	190	1.17 (1.14-1.19)	2.52e-39	1.25e-36	-	-	-	-	-	-
	1-stearoyl-2-arachidonoyl-GPC (18:0/20:4)	42450	HMDB08048	16219824	C00157	CCCCCCCCCCCCCCCCCC(=O)OC[C@]([H])(COP([O-])(=O)OCC[N+](C)(C)C)OC(=O)CCC\C=C/C\C=C/C\C=C/C\C=C/CCCCC	Lipids	Phosphatidylcholine (PC)	Sensitivity	Inverse variance weighted (fixed effects)	-	-	-	-	-	-	-	-	190	1.17 (1.14-1.19)	1.24e-41	-	-	-	-	-	-	-
	1-stearoyl-2-arachidonoyl-GPC (18:0/20:4)	42450	HMDB08048	16219824	C00157	CCCCCCCCCCCCCCCCCC(=O)OC[C@]([H])(COP([O-])(=O)OCC[N+](C)(C)C)OC(=O)CCC\C=C/C\C=C/C\C=C/C\C=C/CCCCC	Lipids	Phosphatidylcholine (PC)	Sensitivity	Inverse variance weighted (multiplicative random effects)	-	-	-	-	-	-	-	-	190	1.17 (1.14-1.19)	2.52e-39	-	-	-	-	-	-	-
	1-stearoyl-2-arachidonoyl-GPC (18:0/20:4)	42450	HMDB08048	16219824	C00157	CCCCCCCCCCCCCCCCCC(=O)OC[C@]([H])(COP([O-])(=O)OCC[N+](C)(C)C)OC(=O)CCC\C=C/C\C=C/C\C=C/C\C=C/CCCCC	Lipids	Phosphatidylcholine (PC)	Sensitivity	MR Egger	-	-	-	-	-	-	-	-	190	1.02 (0.96-1.09)	0.478239	-	-	-	-	-	-	-
	1-stearoyl-2-arachidonoyl-GPC (18:0/20:4)	42450	HMDB08048	16219824	C00157	CCCCCCCCCCCCCCCCCC(=O)OC[C@]([H])(COP([O-])(=O)OCC[N+](C)(C)C)OC(=O)CCC\C=C/C\C=C/C\C=C/C\C=C/CCCCC	Lipids	Phosphatidylcholine (PC)	Sensitivity	Weighted median	-	-	-	-	-	-	-	-	190	1.12 (1.08-1.16)	2.18e-09	-	-	-	-	-	-	-
	1-stearoyl-2-arachidonoyl-GPC (18:0/20:4)	42450	HMDB08048	16219824	C00157	CCCCCCCCCCCCCCCCCC(=O)OC[C@]([H])(COP([O-])(=O)OCC[N+](C)(C)C)OC(=O)CCC\C=C/C\C=C/C\C=C/C\C=C/CCCCC	Lipids	Phosphatidylcholine (PC)	Sensitivity	Weighted mode	-	-	-	-	-	-	-	-	190	1.07 (1.02-1.13)	0.0121253	-	-	-	-	-	-	-
	1-stearoyl-2-arachidonoyl-GPE (18:0/20:4)	52447	HMDB09003	5289133	C00350	[H][C@@](COC(=O)CCCCCCCCCCCCCCCCC)(COP(O)(=O)OCCN)OC(=O)CCC\C=C/C\C=C/C\C=C/C\C=C/CCCCC	Lipids	Phosphatidylethanolamine (PE)	Primary	Inverse variance weighted (random effects)/ Wald ratio	-	-	-	-	-	-	-	-	12	1.03 (0.94-1.14)	0.480411	0.987241	-	-	-	-	-	-
	1-stearoyl-2-arachidonoyl-GPE (18:0/20:4)	52447	HMDB09003	5289133	C00350	[H][C@@](COC(=O)CCCCCCCCCCCCCCCCC)(COP(O)(=O)OCCN)OC(=O)CCC\C=C/C\C=C/C\C=C/C\C=C/CCCCC	Lipids	Phosphatidylethanolamine (PE)	Sensitivity	Inverse variance weighted (fixed effects)	-	-	-	-	-	-	-	-	12	1.03 (0.94-1.14)	0.480411	-	-	-	-	-	-	-
	1-stearoyl-2-arachidonoyl-GPE (18:0/20:4)	52447	HMDB09003	5289133	C00350	[H][C@@](COC(=O)CCCCCCCCCCCCCCCCC)(COP(O)(=O)OCCN)OC(=O)CCC\C=C/C\C=C/C\C=C/C\C=C/CCCCC	Lipids	Phosphatidylethanolamine (PE)	Sensitivity	Inverse variance weighted (multiplicative random effects)	-	-	-	-	-	-	-	-	12	1.03 (0.95-1.13)	0.457912	-	-	-	-	-	-	-
	1-stearoyl-2-arachidonoyl-GPE (18:0/20:4)	52447	HMDB09003	5289133	C00350	[H][C@@](COC(=O)CCCCCCCCCCCCCCCCC)(COP(O)(=O)OCCN)OC(=O)CCC\C=C/C\C=C/C\C=C/C\C=C/CCCCC	Lipids	Phosphatidylethanolamine (PE)	Sensitivity	MR Egger	-	-	-	-	-	-	-	-	12	0.91 (0.65-1.28)	0.591488	-	-	-	-	-	-	-
	1-stearoyl-2-arachidonoyl-GPE (18:0/20:4)	52447	HMDB09003	5289133	C00350	[H][C@@](COC(=O)CCCCCCCCCCCCCCCCC)(COP(O)(=O)OCCN)OC(=O)CCC\C=C/C\C=C/C\C=C/C\C=C/CCCCC	Lipids	Phosphatidylethanolamine (PE)	Sensitivity	Weighted median	-	-	-	-	-	-	-	-	12	1.03 (0.92-1.16)	0.604285	-	-	-	-	-	-	-
	1-stearoyl-2-arachidonoyl-GPE (18:0/20:4)	52447	HMDB09003	5289133	C00350	[H][C@@](COC(=O)CCCCCCCCCCCCCCCCC)(COP(O)(=O)OCCN)OC(=O)CCC\C=C/C\C=C/C\C=C/C\C=C/CCCCC	Lipids	Phosphatidylethanolamine (PE)	Sensitivity	Weighted mode	-	-	-	-	-	-	-	-	12	1.02 (0.89-1.17)	0.783885	-	-	-	-	-	-	-
	1-stearoyl-2-arachidonoyl-GPI (18:0/20:4)	52449	HMDB09815	42607491	-	CCCCCCCCCCCCCCCCCC(=O)OC[C@H](COP(O)(=O)O[C@H]1[C@H](O)[C@@H](O)[C@H](O)[C@@H](O)[C@H]1O)OC(=O)CCC\C=C/C\C=C/C\C=C/C\C=C/CCCCC	Lipids	Phosphatidylinositol (PI)	Primary	Inverse variance weighted (random effects)/ Wald ratio	-	-	-	-	-	-	-	-	11	1.16 (1.04-1.29)	0.00630121	0.0866417	-	-	-	-	-	-
	1-stearoyl-2-arachidonoyl-GPI (18:0/20:4)	52449	HMDB09815	42607491	-	CCCCCCCCCCCCCCCCCC(=O)OC[C@H](COP(O)(=O)O[C@H]1[C@H](O)[C@@H](O)[C@H](O)[C@@H](O)[C@H]1O)OC(=O)CCC\C=C/C\C=C/C\C=C/C\C=C/CCCCC	Lipids	Phosphatidylinositol (PI)	Sensitivity	Inverse variance weighted (fixed effects)	-	-	-	-	-	-	-	-	11	1.16 (1.04-1.29)	0.00630121	-	-	-	-	-	-	-
	1-stearoyl-2-arachidonoyl-GPI (18:0/20:4)	52449	HMDB09815	42607491	-	CCCCCCCCCCCCCCCCCC(=O)OC[C@H](COP(O)(=O)O[C@H]1[C@H](O)[C@@H](O)[C@H](O)[C@@H](O)[C@H]1O)OC(=O)CCC\C=C/C\C=C/C\C=C/C\C=C/CCCCC	Lipids	Phosphatidylinositol (PI)	Sensitivity	Inverse variance weighted (multiplicative random effects)	-	-	-	-	-	-	-	-	11	1.16 (1.07-1.26)	0.000185517	-	-	-	-	-	-	-
	1-stearoyl-2-arachidonoyl-GPI (18:0/20:4)	52449	HMDB09815	42607491	-	CCCCCCCCCCCCCCCCCC(=O)OC[C@H](COP(O)(=O)O[C@H]1[C@H](O)[C@@H](O)[C@H](O)[C@@H](O)[C@H]1O)OC(=O)CCC\C=C/C\C=C/C\C=C/C\C=C/CCCCC	Lipids	Phosphatidylinositol (PI)	Sensitivity	MR Egger	-	-	-	-	-	-	-	-	11	0.97 (0.57-1.65)	0.912317	-	-	-	-	-	-	-
	1-stearoyl-2-arachidonoyl-GPI (18:0/20:4)	52449	HMDB09815	42607491	-	CCCCCCCCCCCCCCCCCC(=O)OC[C@H](COP(O)(=O)O[C@H]1[C@H](O)[C@@H](O)[C@H](O)[C@@H](O)[C@H]1O)OC(=O)CCC\C=C/C\C=C/C\C=C/C\C=C/CCCCC	Lipids	Phosphatidylinositol (PI)	Sensitivity	Weighted median	-	-	-	-	-	-	-	-	11	1.18 (1.02-1.37)	0.0249464	-	-	-	-	-	-	-
	1-stearoyl-2-arachidonoyl-GPI (18:0/20:4)	52449	HMDB09815	42607491	-	CCCCCCCCCCCCCCCCCC(=O)OC[C@H](COP(O)(=O)O[C@H]1[C@H](O)[C@@H](O)[C@H](O)[C@@H](O)[C@H]1O)OC(=O)CCC\C=C/C\C=C/C\C=C/C\C=C/CCCCC	Lipids	Phosphatidylinositol (PI)	Sensitivity	Weighted mode	-	-	-	-	-	-	-	-	11	1.2 (0.98-1.49)	0.113203	-	-	-	-	-	-	-
	1-stearoyl-2-linoleoyl-GPC (18:0/18:2)*	52452	HMDB08039	6441487	C00157	CCCCCCCCCCCCCCCCCC(=O)OC[C@]([H])(COP([O-])(=O)OCC[N+](C)(C)C)OC(=O)CCCCCCC\C=C/C\C=C/CCCCC	Lipids	Phosphatidylcholine (PC)	Primary	Inverse variance weighted (random effects)/ Wald ratio	-	-	-	-	-	-	-	-	1	0.8 (0.61-1.05)	0.108097	0.526474	-	-	-	-	-	-
	1-stearoyl-2-linoleoyl-GPE (18:0/18:2)*	52446	HMDB08994	9546749	C00350	[H][C@@](COC(=O)CCCCCCCCCCCCCCCCC)(COP(O)(=O)OCCN)OC(=O)CCCCCCC\C=C/C\C=C/CCCCC	Lipids	Phosphatidylethanolamine (PE)	Primary	Inverse variance weighted (random effects)/ Wald ratio	-	-	-	-	-	-	-	-	17	0.88 (0.81-0.95)	0.000696823	0.0137971	-	-	-	-	-	-
	1-stearoyl-2-linoleoyl-GPE (18:0/18:2)*	52446	HMDB08994	9546749	C00350	[H][C@@](COC(=O)CCCCCCCCCCCCCCCCC)(COP(O)(=O)OCCN)OC(=O)CCCCCCC\C=C/C\C=C/CCCCC	Lipids	Phosphatidylethanolamine (PE)	Sensitivity	Inverse variance weighted (fixed effects)	-	-	-	-	-	-	-	-	17	0.88 (0.81-0.95)	0.000696823	-	-	-	-	-	-	-
	1-stearoyl-2-linoleoyl-GPE (18:0/18:2)*	52446	HMDB08994	9546749	C00350	[H][C@@](COC(=O)CCCCCCCCCCCCCCCCC)(COP(O)(=O)OCCN)OC(=O)CCCCCCC\C=C/C\C=C/CCCCC	Lipids	Phosphatidylethanolamine (PE)	Sensitivity	Inverse variance weighted (multiplicative random effects)	-	-	-	-	-	-	-	-	17	0.88 (0.82-0.94)	0.000107567	-	-	-	-	-	-	-
	1-stearoyl-2-linoleoyl-GPE (18:0/18:2)*	52446	HMDB08994	9546749	C00350	[H][C@@](COC(=O)CCCCCCCCCCCCCCCCC)(COP(O)(=O)OCCN)OC(=O)CCCCCCC\C=C/C\C=C/CCCCC	Lipids	Phosphatidylethanolamine (PE)	Sensitivity	MR Egger	-	-	-	-	-	-	-	-	17	1.09 (0.83-1.43)	0.556551	-	-	-	-	-	-	-
	1-stearoyl-2-linoleoyl-GPE (18:0/18:2)*	52446	HMDB08994	9546749	C00350	[H][C@@](COC(=O)CCCCCCCCCCCCCCCCC)(COP(O)(=O)OCCN)OC(=O)CCCCCCC\C=C/C\C=C/CCCCC	Lipids	Phosphatidylethanolamine (PE)	Sensitivity	Weighted median	-	-	-	-	-	-	-	-	17	0.87 (0.79-0.97)	0.0113721	-	-	-	-	-	-	-
	1-stearoyl-2-linoleoyl-GPE (18:0/18:2)*	52446	HMDB08994	9546749	C00350	[H][C@@](COC(=O)CCCCCCCCCCCCCCCCC)(COP(O)(=O)OCCN)OC(=O)CCCCCCC\C=C/C\C=C/CCCCC	Lipids	Phosphatidylethanolamine (PE)	Sensitivity	Weighted mode	-	-	-	-	-	-	-	-	17	0.88 (0.76-1.02)	0.113232	-	-	-	-	-	-	-
	1-stearoyl-2-linoleoyl-GPI (18:0/18:2)	52468	HMDB09809	52928409	C00626	[H][C@@](COC(=O)CCCCCCCCCCCCCCCCC)(COP(O)(=O)O[C@H]1C(O)C(O)C(O)[C@@H](O)C1O)OC(=O)CCCCCCC\C=C/C\C=C/CCCCC	Lipids	Phosphatidylinositol (PI)	Primary	Inverse variance weighted (random effects)/ Wald ratio	-	-	-	-	-	-	-	-	6	0.95 (0.83-1.1)	0.527333	0.994872	-	-	-	-	-	-
	1-stearoyl-2-linoleoyl-GPI (18:0/18:2)	52468	HMDB09809	52928409	C00626	[H][C@@](COC(=O)CCCCCCCCCCCCCCCCC)(COP(O)(=O)O[C@H]1C(O)C(O)C(O)[C@@H](O)C1O)OC(=O)CCCCCCC\C=C/C\C=C/CCCCC	Lipids	Phosphatidylinositol (PI)	Sensitivity	Inverse variance weighted (fixed effects)	-	-	-	-	-	-	-	-	6	0.95 (0.83-1.1)	0.527333	-	-	-	-	-	-	-
	1-stearoyl-2-linoleoyl-GPI (18:0/18:2)	52468	HMDB09809	52928409	C00626	[H][C@@](COC(=O)CCCCCCCCCCCCCCCCC)(COP(O)(=O)O[C@H]1C(O)C(O)C(O)[C@@H](O)C1O)OC(=O)CCCCCCC\C=C/C\C=C/CCCCC	Lipids	Phosphatidylinositol (PI)	Sensitivity	Inverse variance weighted (multiplicative random effects)	-	-	-	-	-	-	-	-	6	0.95 (0.84-1.09)	0.481483	-	-	-	-	-	-	-
	1-stearoyl-2-linoleoyl-GPI (18:0/18:2)	52468	HMDB09809	52928409	C00626	[H][C@@](COC(=O)CCCCCCCCCCCCCCCCC)(COP(O)(=O)O[C@H]1C(O)C(O)C(O)[C@@H](O)C1O)OC(=O)CCCCCCC\C=C/C\C=C/CCCCC	Lipids	Phosphatidylinositol (PI)	Sensitivity	MR Egger	-	-	-	-	-	-	-	-	6	0.88 (0.36-2.13)	0.787049	-	-	-	-	-	-	-
	1-stearoyl-2-linoleoyl-GPI (18:0/18:2)	52468	HMDB09809	52928409	C00626	[H][C@@](COC(=O)CCCCCCCCCCCCCCCCC)(COP(O)(=O)O[C@H]1C(O)C(O)C(O)[C@@H](O)C1O)OC(=O)CCCCCCC\C=C/C\C=C/CCCCC	Lipids	Phosphatidylinositol (PI)	Sensitivity	Weighted median	-	-	-	-	-	-	-	-	6	0.99 (0.83-1.18)	0.904711	-	-	-	-	-	-	-
	1-stearoyl-2-linoleoyl-GPI (18:0/18:2)	52468	HMDB09809	52928409	C00626	[H][C@@](COC(=O)CCCCCCCCCCCCCCCCC)(COP(O)(=O)O[C@H]1C(O)C(O)C(O)[C@@H](O)C1O)OC(=O)CCCCCCC\C=C/C\C=C/CCCCC	Lipids	Phosphatidylinositol (PI)	Sensitivity	Weighted mode	-	-	-	-	-	-	-	-	6	0.99 (0.78-1.26)	0.952767	-	-	-	-	-	-	-
	1-stearoyl-2-oleoyl-GPE (18:0/18:1)	42448	HMDB08993	9546742	C00350	[H][C@@](COC(=O)CCCCCCCCCCCCCCCCC)(COP(O)(=O)OCCN)OC(=O)CCCCCCC\C=C/CCCCCCCC	Lipids	Phosphatidylethanolamine (PE)	Primary	Inverse variance weighted (random effects)/ Wald ratio	-	-	-	-	-	-	-	-	3	1.01 (0.86-1.19)	0.896312	0.997882	-	-	-	-	-	-
	1-stearoyl-2-oleoyl-GPE (18:0/18:1)	42448	HMDB08993	9546742	C00350	[H][C@@](COC(=O)CCCCCCCCCCCCCCCCC)(COP(O)(=O)OCCN)OC(=O)CCCCCCC\C=C/CCCCCCCC	Lipids	Phosphatidylethanolamine (PE)	Sensitivity	Inverse variance weighted (fixed effects)	-	-	-	-	-	-	-	-	3	1.01 (0.86-1.19)	0.896312	-	-	-	-	-	-	-
	1-stearoyl-2-oleoyl-GPE (18:0/18:1)	42448	HMDB08993	9546742	C00350	[H][C@@](COC(=O)CCCCCCCCCCCCCCCCC)(COP(O)(=O)OCCN)OC(=O)CCCCCCC\C=C/CCCCCCCC	Lipids	Phosphatidylethanolamine (PE)	Sensitivity	Inverse variance weighted (multiplicative random effects)	-	-	-	-	-	-	-	-	3	1.01 (0.96-1.06)	0.657829	-	-	-	-	-	-	-
	1-stearoyl-2-oleoyl-GPE (18:0/18:1)	42448	HMDB08993	9546742	C00350	[H][C@@](COC(=O)CCCCCCCCCCCCCCCCC)(COP(O)(=O)OCCN)OC(=O)CCCCCCC\C=C/CCCCCCCC	Lipids	Phosphatidylethanolamine (PE)	Sensitivity	MR Egger	-	-	-	-	-	-	-	-	3	1.14 (0.48-2.72)	0.818452	-	-	-	-	-	-	-
	1-stearoyl-2-oleoyl-GPE (18:0/18:1)	42448	HMDB08993	9546742	C00350	[H][C@@](COC(=O)CCCCCCCCCCCCCCCCC)(COP(O)(=O)OCCN)OC(=O)CCCCCCC\C=C/CCCCCCCC	Lipids	Phosphatidylethanolamine (PE)	Sensitivity	Weighted median	-	-	-	-	-	-	-	-	3	1.01 (0.85-1.2)	0.887206	-	-	-	-	-	-	-
	1-stearoyl-2-oleoyl-GPE (18:0/18:1)	42448	HMDB08993	9546742	C00350	[H][C@@](COC(=O)CCCCCCCCCCCCCCCCC)(COP(O)(=O)OCCN)OC(=O)CCCCCCC\C=C/CCCCCCCC	Lipids	Phosphatidylethanolamine (PE)	Sensitivity	Weighted mode	-	-	-	-	-	-	-	-	3	1.01 (0.82-1.25)	0.907248	-	-	-	-	-	-	-
	1-stearoyl-2-oleoyl-GPI (18:0/18:1)*	52726	-	-	-	-	Lipids	Phosphatidylinositol (PI)	Primary	Inverse variance weighted (random effects)/ Wald ratio	-	-	-	-	-	-	-	-	5	0.97 (0.82-1.14)	0.705414	0.994872	-	-	-	-	-	-
	1-stearoyl-2-oleoyl-GPI (18:0/18:1)*	52726	-	-	-	-	Lipids	Phosphatidylinositol (PI)	Sensitivity	Inverse variance weighted (fixed effects)	-	-	-	-	-	-	-	-	5	0.97 (0.82-1.14)	0.705414	-	-	-	-	-	-	-
	1-stearoyl-2-oleoyl-GPI (18:0/18:1)*	52726	-	-	-	-	Lipids	Phosphatidylinositol (PI)	Sensitivity	Inverse variance weighted (multiplicative random effects)	-	-	-	-	-	-	-	-	5	0.97 (0.87-1.08)	0.550958	-	-	-	-	-	-	-
	1-stearoyl-2-oleoyl-GPI (18:0/18:1)*	52726	-	-	-	-	Lipids	Phosphatidylinositol (PI)	Sensitivity	MR Egger	-	-	-	-	-	-	-	-	5	0.99 (0.5-1.94)	0.969632	-	-	-	-	-	-	-
	1-stearoyl-2-oleoyl-GPI (18:0/18:1)*	52726	-	-	-	-	Lipids	Phosphatidylinositol (PI)	Sensitivity	Weighted median	-	-	-	-	-	-	-	-	5	1.01 (0.83-1.23)	0.897767	-	-	-	-	-	-	-
	1-stearoyl-2-oleoyl-GPI (18:0/18:1)*	52726	-	-	-	-	Lipids	Phosphatidylinositol (PI)	Sensitivity	Weighted mode	-	-	-	-	-	-	-	-	5	1.03 (0.81-1.32)	0.815131	-	-	-	-	-	-	-
	1-stearoyl-GPC (18:0)	33961	HMDB10384	497299	C04230	CCCCCCCCCCCCCCCCCC(=O)OC[C@@H](O)COP([O-])(=O)OCC[N+](C)(C)C	Lipids	Lysophospholipid	Primary	Inverse variance weighted (random effects)/ Wald ratio	-	-	-	-	-	-	-	-	1	1.18 (0.8-1.73)	0.412374	0.987241	-	-	-	-	-	-
	1-stearoyl-GPE (18:0)	42398	HMDB11130	9547068	C21484	[H][C@@](O)(COC(=O)CCCCCCCCCCCCCCCCC)COP(O)(=O)OCCN	Lipids	Lysophospholipid	Primary	Inverse variance weighted (random effects)/ Wald ratio	2	0.99 (0.9-1.08)	0.757033	0.884862	2	1 (0.9-1.1)	0.933535	0.84396	6	0.93 (0.78-1.11)	0.425689	0.987241	3	1 (0.95-1.06)	0.964987	0.964987	0	0.554368
	1-stearoyl-GPE (18:0)	42398	HMDB11130	9547068	C21484	[H][C@@](O)(COC(=O)CCCCCCCCCCCCCCCCC)COP(O)(=O)OCCN	Lipids	Lysophospholipid	Sensitivity	Inverse variance weighted (fixed effects)	2	0.99 (0.9-1.08)	0.757033	-	2	1 (0.96-1.04)	0.837282	-	6	0.93 (0.81-1.06)	0.283303	-	-	-	-	-	-	-
	1-stearoyl-GPE (18:0)	42398	HMDB11130	9547068	C21484	[H][C@@](O)(COC(=O)CCCCCCCCCCCCCCCCC)COP(O)(=O)OCCN	Lipids	Lysophospholipid	Sensitivity	Inverse variance weighted (multiplicative random effects)	2	0.99 (0.95-1.02)	0.449913	-	2	1 (0.9-1.1)	0.933535	-	6	0.93 (0.78-1.11)	0.425689	-	-	-	-	-	-	-
	1-stearoyl-GPE (18:0)	42398	HMDB11130	9547068	C21484	[H][C@@](O)(COC(=O)CCCCCCCCCCCCCCCCC)COP(O)(=O)OCCN	Lipids	Lysophospholipid	Sensitivity	MR Egger	-	-	-	-	-	-	-	-	6	1.26 (0.65-2.45)	0.533941	-	-	-	-	-	-	-
	1-stearoyl-GPE (18:0)	42398	HMDB11130	9547068	C21484	[H][C@@](O)(COC(=O)CCCCCCCCCCCCCCCCC)COP(O)(=O)OCCN	Lipids	Lysophospholipid	Sensitivity	Weighted median	-	-	-	-	-	-	-	-	6	1 (0.85-1.17)	0.958331	-	-	-	-	-	-	-
	1-stearoyl-GPE (18:0)	42398	HMDB11130	9547068	C21484	[H][C@@](O)(COC(=O)CCCCCCCCCCCCCCCCC)COP(O)(=O)OCCN	Lipids	Lysophospholipid	Sensitivity	Weighted mode	-	-	-	-	-	-	-	-	6	0.99 (0.83-1.19)	0.95766	-	-	-	-	-	-	-
	1-stearoyl-GPG (18:0)	34437	-	-	-	-	Lipids	Lysophospholipid	Primary	Inverse variance weighted (random effects)/ Wald ratio	-	-	-	-	2	1.03 (0.95-1.11)	0.501599	0.960725	1	1.25 (0.76-2.08)	0.379704	0.968831	2	1 (0.91-1.1)	0.933135	0.955006	0	0.379738
	1-stearoyl-GPG (18:0)	34437	-	-	-	-	Lipids	Lysophospholipid	Sensitivity	Inverse variance weighted (fixed effects)	-	-	-	-	2	1.03 (0.99-1.06)	0.155003	-	-	-	-	-	-	-	-	-	-	-
	1-stearoyl-GPG (18:0)	34437	-	-	-	-	Lipids	Lysophospholipid	Sensitivity	Inverse variance weighted (multiplicative random effects)	-	-	-	-	2	1.03 (0.95-1.11)	0.501599	-	-	-	-	-	-	-	-	-	-	-
	1-stearoyl-GPI (18:0)	19324	HMDB61696	-	-	-	Lipids	Lysophospholipid	Primary	Inverse variance weighted (random effects)/ Wald ratio	-	-	-	-	1	1.01 (0.96-1.06)	0.846992	0.95162	3	0.98 (0.77-1.25)	0.888861	0.997496	2	1 (0.96-1.06)	0.87251	0.939606	0	0.860222
	1-stearoyl-GPI (18:0)	19324	HMDB61696	-	-	-	Lipids	Lysophospholipid	Sensitivity	Inverse variance weighted (fixed effects)	-	-	-	-	-	-	-	-	3	0.98 (0.77-1.25)	0.888861	-	-	-	-	-	-	-
	1-stearoyl-GPI (18:0)	19324	HMDB61696	-	-	-	Lipids	Lysophospholipid	Sensitivity	Inverse variance weighted (multiplicative random effects)	-	-	-	-	-	-	-	-	3	0.98 (0.95-1.01)	0.277416	-	-	-	-	-	-	-
	1-stearoyl-GPI (18:0)	19324	HMDB61696	-	-	-	Lipids	Lysophospholipid	Sensitivity	MR Egger	-	-	-	-	-	-	-	-	3	1.08 (0.26-4.57)	0.933063	-	-	-	-	-	-	-
	1-stearoyl-GPI (18:0)	19324	HMDB61696	-	-	-	Lipids	Lysophospholipid	Sensitivity	Weighted median	-	-	-	-	-	-	-	-	3	1 (0.75-1.33)	0.998365	-	-	-	-	-	-	-
	1-stearoyl-GPI (18:0)	19324	HMDB61696	-	-	-	Lipids	Lysophospholipid	Sensitivity	Weighted mode	-	-	-	-	-	-	-	-	3	1 (0.71-1.4)	0.997188	-	-	-	-	-	-	-
	10-heptadecenoate (17:1n7)	33971	HMDB60038	5312435	-	CCCCCC\C=C/CCCCCCCCC(O)=O	Lipids	Long Chain Fatty Acid	Primary	Inverse variance weighted (random effects)/ Wald ratio	2	1.13 (1.01-1.26)	0.0343023	0.610482	-	-	-	-	1	1.13 (0.68-1.86)	0.644171	0.994872	2	1.13 (1.01-1.25)	0.0302906	0.165336	0	0.998424
	10-heptadecenoate (17:1n7)	33971	HMDB60038	5312435	-	CCCCCC\C=C/CCCCCCCCC(O)=O	Lipids	Long Chain Fatty Acid	Sensitivity	Inverse variance weighted (fixed effects)	2	1.13 (1.01-1.26)	0.0343023	-	-	-	-	-	-	-	-	-	-	-	-	-	-	-
	10-heptadecenoate (17:1n7)	33971	HMDB60038	5312435	-	CCCCCC\C=C/CCCCCCCCC(O)=O	Lipids	Long Chain Fatty Acid	Sensitivity	Inverse variance weighted (multiplicative random effects)	2	1.13 (1.08-1.18)	1.55689e-07	-	-	-	-	-	-	-	-	-	-	-	-	-	-	-
	10-undecenoate (11:1n1)	32497	HMDB33724	14891	C13910	OC(=O)CCCCCCCCC=C	Lipids	Medium Chain Fatty Acid	Primary	Inverse variance weighted (random effects)/ Wald ratio	-	-	-	-	-	-	-	-	7	1.05 (0.89-1.25)	0.564516	0.994872	-	-	-	-	-	-
	10-undecenoate (11:1n1)	32497	HMDB33724	14891	C13910	OC(=O)CCCCCCCCC=C	Lipids	Medium Chain Fatty Acid	Sensitivity	Inverse variance weighted (fixed effects)	-	-	-	-	-	-	-	-	7	1.05 (0.93-1.19)	0.432689	-	-	-	-	-	-	-
	10-undecenoate (11:1n1)	32497	HMDB33724	14891	C13910	OC(=O)CCCCCCCCC=C	Lipids	Medium Chain Fatty Acid	Sensitivity	Inverse variance weighted (multiplicative random effects)	-	-	-	-	-	-	-	-	7	1.05 (0.89-1.25)	0.564516	-	-	-	-	-	-	-
	10-undecenoate (11:1n1)	32497	HMDB33724	14891	C13910	OC(=O)CCCCCCCCC=C	Lipids	Medium Chain Fatty Acid	Sensitivity	MR Egger	-	-	-	-	-	-	-	-	7	1.3 (0.81-2.1)	0.328192	-	-	-	-	-	-	-
	10-undecenoate (11:1n1)	32497	HMDB33724	14891	C13910	OC(=O)CCCCCCCCC=C	Lipids	Medium Chain Fatty Acid	Sensitivity	Weighted median	-	-	-	-	-	-	-	-	7	1.07 (0.93-1.24)	0.349396	-	-	-	-	-	-	-
	10-undecenoate (11:1n1)	32497	HMDB33724	14891	C13910	OC(=O)CCCCCCCCC=C	Lipids	Medium Chain Fatty Acid	Sensitivity	Weighted mode	-	-	-	-	-	-	-	-	7	1.07 (0.93-1.24)	0.367169	-	-	-	-	-	-	-
	12-HETE	37536	HMDB06111	5312983	C14777	CCCCC\C=C/C[C@H](O)\C=C\C=C/C\C=C/CCCC(O)=O	Lipids	Eicosanoid	Primary	Inverse variance weighted (random effects)/ Wald ratio	-	-	-	-	-	-	-	-	3	1.15 (0.94-1.42)	0.166443	0.653885	-	-	-	-	-	-
	12-HETE	37536	HMDB06111	5312983	C14777	CCCCC\C=C/C[C@H](O)\C=C\C=C/C\C=C/CCCC(O)=O	Lipids	Eicosanoid	Sensitivity	Inverse variance weighted (fixed effects)	-	-	-	-	-	-	-	-	3	1.15 (0.94-1.42)	0.166443	-	-	-	-	-	-	-
	12-HETE	37536	HMDB06111	5312983	C14777	CCCCC\C=C/C[C@H](O)\C=C\C=C/C\C=C/CCCC(O)=O	Lipids	Eicosanoid	Sensitivity	Inverse variance weighted (multiplicative random effects)	-	-	-	-	-	-	-	-	3	1.15 (1.06-1.25)	0.000527823	-	-	-	-	-	-	-
	12-HETE	37536	HMDB06111	5312983	C14777	CCCCC\C=C/C[C@H](O)\C=C\C=C/C\C=C/CCCC(O)=O	Lipids	Eicosanoid	Sensitivity	MR Egger	-	-	-	-	-	-	-	-	3	0.93 (0.2-4.29)	0.942483	-	-	-	-	-	-	-
	12-HETE	37536	HMDB06111	5312983	C14777	CCCCC\C=C/C[C@H](O)\C=C\C=C/C\C=C/CCCC(O)=O	Lipids	Eicosanoid	Sensitivity	Weighted median	-	-	-	-	-	-	-	-	3	1.15 (0.91-1.46)	0.251347	-	-	-	-	-	-	-
	12-HETE	37536	HMDB06111	5312983	C14777	CCCCC\C=C/C[C@H](O)\C=C\C=C/C\C=C/CCCC(O)=O	Lipids	Eicosanoid	Sensitivity	Weighted mode	-	-	-	-	-	-	-	-	3	1.11 (0.85-1.45)	0.533458	-	-	-	-	-	-	-
	13-HODE + 9-HODE	37752	-	43013	-	-	Lipids	Fatty Acid, Monohydroxy	Primary	Inverse variance weighted (random effects)/ Wald ratio	1	0.9 (0.79-1.04)	0.157632	0.863252	1	0.97 (0.93-1.01)	0.119615	0.348587	-	-	-	-	2	0.96 (0.92-1)	0.0566836	0.225017	0	0.374968
	16a-hydroxy DHEA 3-sulfate	38168	HMDB0062544	20848951	-	[H][C@@]12C[C@@H](O)C(=O)[C@@]1(C)CC[C@@]1([H])[C@@]2([H])CC=C2C[C@H](CC[C@]12C)OS(O)(=O)=O	Lipids	Androgenic Steroids	Primary	Inverse variance weighted (random effects)/ Wald ratio	-	-	-	-	-	-	-	-	4	1.04 (0.9-1.21)	0.605606	0.994872	-	-	-	-	-	-
	16a-hydroxy DHEA 3-sulfate	38168	HMDB0062544	20848951	-	[H][C@@]12C[C@@H](O)C(=O)[C@@]1(C)CC[C@@]1([H])[C@@]2([H])CC=C2C[C@H](CC[C@]12C)OS(O)(=O)=O	Lipids	Androgenic Steroids	Sensitivity	Inverse variance weighted (fixed effects)	-	-	-	-	-	-	-	-	4	1.04 (0.9-1.21)	0.605606	-	-	-	-	-	-	-
	16a-hydroxy DHEA 3-sulfate	38168	HMDB0062544	20848951	-	[H][C@@]12C[C@@H](O)C(=O)[C@@]1(C)CC[C@@]1([H])[C@@]2([H])CC=C2C[C@H](CC[C@]12C)OS(O)(=O)=O	Lipids	Androgenic Steroids	Sensitivity	Inverse variance weighted (multiplicative random effects)	-	-	-	-	-	-	-	-	4	1.04 (0.92-1.17)	0.526013	-	-	-	-	-	-	-
	16a-hydroxy DHEA 3-sulfate	38168	HMDB0062544	20848951	-	[H][C@@]12C[C@@H](O)C(=O)[C@@]1(C)CC[C@@]1([H])[C@@]2([H])CC=C2C[C@H](CC[C@]12C)OS(O)(=O)=O	Lipids	Androgenic Steroids	Sensitivity	MR Egger	-	-	-	-	-	-	-	-	4	0.95 (0.75-1.2)	0.709799	-	-	-	-	-	-	-
	16a-hydroxy DHEA 3-sulfate	38168	HMDB0062544	20848951	-	[H][C@@]12C[C@@H](O)C(=O)[C@@]1(C)CC[C@@]1([H])[C@@]2([H])CC=C2C[C@H](CC[C@]12C)OS(O)(=O)=O	Lipids	Androgenic Steroids	Sensitivity	Weighted median	-	-	-	-	-	-	-	-	4	1.03 (0.87-1.22)	0.745467	-	-	-	-	-	-	-
	16a-hydroxy DHEA 3-sulfate	38168	HMDB0062544	20848951	-	[H][C@@]12C[C@@H](O)C(=O)[C@@]1(C)CC[C@@]1([H])[C@@]2([H])CC=C2C[C@H](CC[C@]12C)OS(O)(=O)=O	Lipids	Androgenic Steroids	Sensitivity	Weighted mode	-	-	-	-	-	-	-	-	4	1.01 (0.83-1.22)	0.961839	-	-	-	-	-	-	-
	2'-O-methylcytidine	57554	-	150971	-	-	Nucleotides	Pyrimidine Metabolism, Cytidine containing	Primary	Inverse variance weighted (random effects)/ Wald ratio	-	-	-	-	-	-	-	-	13	0.99 (0.9-1.08)	0.769064	0.994872	-	-	-	-	-	-
	2'-O-methylcytidine	57554	-	150971	-	-	Nucleotides	Pyrimidine Metabolism, Cytidine containing	Sensitivity	Inverse variance weighted (fixed effects)	-	-	-	-	-	-	-	-	13	0.99 (0.92-1.06)	0.69731	-	-	-	-	-	-	-
	2'-O-methylcytidine	57554	-	150971	-	-	Nucleotides	Pyrimidine Metabolism, Cytidine containing	Sensitivity	Inverse variance weighted (multiplicative random effects)	-	-	-	-	-	-	-	-	13	0.99 (0.9-1.08)	0.769064	-	-	-	-	-	-	-
	2'-O-methylcytidine	57554	-	150971	-	-	Nucleotides	Pyrimidine Metabolism, Cytidine containing	Sensitivity	MR Egger	-	-	-	-	-	-	-	-	13	1.16 (0.98-1.36)	0.108896	-	-	-	-	-	-	-
	2'-O-methylcytidine	57554	-	150971	-	-	Nucleotides	Pyrimidine Metabolism, Cytidine containing	Sensitivity	Weighted median	-	-	-	-	-	-	-	-	13	1.03 (0.95-1.11)	0.538649	-	-	-	-	-	-	-
	2'-O-methylcytidine	57554	-	150971	-	-	Nucleotides	Pyrimidine Metabolism, Cytidine containing	Sensitivity	Weighted mode	-	-	-	-	-	-	-	-	13	1.04 (0.95-1.13)	0.453851	-	-	-	-	-	-	-
	2'-O-methyluridine	57655	-	102212	-	-	Nucleotides	Pyrimidine Metabolism, Uracil containing	Primary	Inverse variance weighted (random effects)/ Wald ratio	-	-	-	-	-	-	-	-	20	1.01 (0.95-1.07)	0.766311	0.994872	-	-	-	-	-	-
	2'-O-methyluridine	57655	-	102212	-	-	Nucleotides	Pyrimidine Metabolism, Uracil containing	Sensitivity	Inverse variance weighted (fixed effects)	-	-	-	-	-	-	-	-	20	1.01 (0.96-1.06)	0.729114	-	-	-	-	-	-	-
	2'-O-methyluridine	57655	-	102212	-	-	Nucleotides	Pyrimidine Metabolism, Uracil containing	Sensitivity	Inverse variance weighted (multiplicative random effects)	-	-	-	-	-	-	-	-	20	1.01 (0.95-1.07)	0.766311	-	-	-	-	-	-	-
	2'-O-methyluridine	57655	-	102212	-	-	Nucleotides	Pyrimidine Metabolism, Uracil containing	Sensitivity	MR Egger	-	-	-	-	-	-	-	-	20	1.08 (0.93-1.25)	0.321913	-	-	-	-	-	-	-
	2'-O-methyluridine	57655	-	102212	-	-	Nucleotides	Pyrimidine Metabolism, Uracil containing	Sensitivity	Weighted median	-	-	-	-	-	-	-	-	20	1.01 (0.94-1.08)	0.736088	-	-	-	-	-	-	-
	2'-O-methyluridine	57655	-	102212	-	-	Nucleotides	Pyrimidine Metabolism, Uracil containing	Sensitivity	Weighted mode	-	-	-	-	-	-	-	-	20	1.02 (0.96-1.09)	0.543486	-	-	-	-	-	-	-
	2'-deoxyuridine	52602	HMDB00012	13712	C00526	OC[C@H]1O[C@H](C[C@@H]1O)N1C=CC(=O)NC1=O	Nucleotides	Pyrimidine Metabolism, Uracil containing	Primary	Inverse variance weighted (random effects)/ Wald ratio	-	-	-	-	-	-	-	-	3	1 (0.84-1.19)	0.999026	0.999026	-	-	-	-	-	-
	2'-deoxyuridine	52602	HMDB00012	13712	C00526	OC[C@H]1O[C@H](C[C@@H]1O)N1C=CC(=O)NC1=O	Nucleotides	Pyrimidine Metabolism, Uracil containing	Sensitivity	Inverse variance weighted (fixed effects)	-	-	-	-	-	-	-	-	3	1 (0.84-1.19)	0.999026	-	-	-	-	-	-	-
	2'-deoxyuridine	52602	HMDB00012	13712	C00526	OC[C@H]1O[C@H](C[C@@H]1O)N1C=CC(=O)NC1=O	Nucleotides	Pyrimidine Metabolism, Uracil containing	Sensitivity	Inverse variance weighted (multiplicative random effects)	-	-	-	-	-	-	-	-	3	1 (0.86-1.17)	0.998895	-	-	-	-	-	-	-
	2'-deoxyuridine	52602	HMDB00012	13712	C00526	OC[C@H]1O[C@H](C[C@@H]1O)N1C=CC(=O)NC1=O	Nucleotides	Pyrimidine Metabolism, Uracil containing	Sensitivity	MR Egger	-	-	-	-	-	-	-	-	3	1.09 (0.66-1.8)	0.786587	-	-	-	-	-	-	-
	2'-deoxyuridine	52602	HMDB00012	13712	C00526	OC[C@H]1O[C@H](C[C@@H]1O)N1C=CC(=O)NC1=O	Nucleotides	Pyrimidine Metabolism, Uracil containing	Sensitivity	Weighted median	-	-	-	-	-	-	-	-	3	1.03 (0.85-1.25)	0.762471	-	-	-	-	-	-	-
	2'-deoxyuridine	52602	HMDB00012	13712	C00526	OC[C@H]1O[C@H](C[C@@H]1O)N1C=CC(=O)NC1=O	Nucleotides	Pyrimidine Metabolism, Uracil containing	Sensitivity	Weighted mode	-	-	-	-	-	-	-	-	3	1.05 (0.84-1.31)	0.69389	-	-	-	-	-	-	-
	2-aminobutyrate	42374	HMDB00650	439691	C02261	CC[C@H](N)C(O)=O	Amino Acids	Glutathione Metabolism	Primary	Inverse variance weighted (random effects)/ Wald ratio	-	-	-	-	1	1.03 (0.97-1.09)	0.348623	0.648316	2	0.98 (0.77-1.24)	0.84699	0.997496	2	1.02 (0.97-1.08)	0.387048	0.737537	0	0.682371
	2-aminobutyrate	42374	HMDB00650	439691	C02261	CC[C@H](N)C(O)=O	Amino Acids	Glutathione Metabolism	Sensitivity	Inverse variance weighted (fixed effects)	-	-	-	-	-	-	-	-	2	0.98 (0.77-1.24)	0.84699	-	-	-	-	-	-	-
	2-aminobutyrate	42374	HMDB00650	439691	C02261	CC[C@H](N)C(O)=O	Amino Acids	Glutathione Metabolism	Sensitivity	Inverse variance weighted (multiplicative random effects)	-	-	-	-	-	-	-	-	2	0.98 (0.8-1.19)	0.819348	-	-	-	-	-	-	-
	2-aminooctanoate	43343	HMDB00991	69522	-	CCCCCCC(N)C(O)=O	Lipids	Fatty Acid, Amino	Primary	Inverse variance weighted (random effects)/ Wald ratio	-	-	-	-	-	-	-	-	8	1.11 (0.97-1.26)	0.115261	0.537787	-	-	-	-	-	-
	2-aminooctanoate	43343	HMDB00991	69522	-	CCCCCCC(N)C(O)=O	Lipids	Fatty Acid, Amino	Sensitivity	Inverse variance weighted (fixed effects)	-	-	-	-	-	-	-	-	8	1.11 (1-1.23)	0.0515984	-	-	-	-	-	-	-
	2-aminooctanoate	43343	HMDB00991	69522	-	CCCCCCC(N)C(O)=O	Lipids	Fatty Acid, Amino	Sensitivity	Inverse variance weighted (multiplicative random effects)	-	-	-	-	-	-	-	-	8	1.11 (0.97-1.26)	0.115261	-	-	-	-	-	-	-
	2-aminooctanoate	43343	HMDB00991	69522	-	CCCCCCC(N)C(O)=O	Lipids	Fatty Acid, Amino	Sensitivity	MR Egger	-	-	-	-	-	-	-	-	8	1 (0.64-1.54)	0.986421	-	-	-	-	-	-	-
	2-aminooctanoate	43343	HMDB00991	69522	-	CCCCCCC(N)C(O)=O	Lipids	Fatty Acid, Amino	Sensitivity	Weighted median	-	-	-	-	-	-	-	-	8	1.12 (0.99-1.26)	0.0675516	-	-	-	-	-	-	-
	2-aminooctanoate	43343	HMDB00991	69522	-	CCCCCCC(N)C(O)=O	Lipids	Fatty Acid, Amino	Sensitivity	Weighted mode	-	-	-	-	-	-	-	-	8	1.12 (1-1.25)	0.0991912	-	-	-	-	-	-	-
	2-aminophenol sulfate	43266	HMDB61116	181670	-	OC1=C(OS(O)(=O)=O)C=CC=C1	Xenobiotics	Chemical	Primary	Inverse variance weighted (random effects)/ Wald ratio	-	-	-	-	-	-	-	-	1	1.17 (0.69-1.98)	0.56295	0.994872	-	-	-	-	-	-
	2-arachidonoylglycerophosphoethanolamine*	-	-	-	-	-	Lipids	Lysolipid	Primary	Inverse variance weighted (random effects)/ Wald ratio	-	-	-	-	2	1.04 (1-1.08)	0.0412024	0.242636	-	-	-	-	-	-	-	-	-	-
	2-arachidonoylglycerophosphoethanolamine*	-	-	-	-	-	Lipids	Lysolipid	Sensitivity	Inverse variance weighted (fixed effects)	-	-	-	-	2	1.04 (1-1.08)	0.0412024	-	-	-	-	-	-	-	-	-	-	-
	2-arachidonoylglycerophosphoethanolamine*	-	-	-	-	-	Lipids	Lysolipid	Sensitivity	Inverse variance weighted (multiplicative random effects)	-	-	-	-	2	1.04 (1.04-1.05)	4.64081e-59	-	-	-	-	-	-	-	-	-	-	-
	2-hydroxy-3-methylvalerate	36746	HMDB00317	164623	-	CC[C@@H](C)[C@@H](O)C(O)=O	Amino Acids	Leucine, Isoleucine and Valine Metabolism	Primary	Inverse variance weighted (random effects)/ Wald ratio	-	-	-	-	-	-	-	-	4	0.92 (0.71-1.19)	0.525564	0.994872	-	-	-	-	-	-
	2-hydroxy-3-methylvalerate	36746	HMDB00317	164623	-	CC[C@@H](C)[C@@H](O)C(O)=O	Amino Acids	Leucine, Isoleucine and Valine Metabolism	Sensitivity	Inverse variance weighted (fixed effects)	-	-	-	-	-	-	-	-	4	0.92 (0.74-1.14)	0.43517	-	-	-	-	-	-	-
	2-hydroxy-3-methylvalerate	36746	HMDB00317	164623	-	CC[C@@H](C)[C@@H](O)C(O)=O	Amino Acids	Leucine, Isoleucine and Valine Metabolism	Sensitivity	Inverse variance weighted (multiplicative random effects)	-	-	-	-	-	-	-	-	4	0.92 (0.71-1.19)	0.525564	-	-	-	-	-	-	-
	2-hydroxy-3-methylvalerate	36746	HMDB00317	164623	-	CC[C@@H](C)[C@@H](O)C(O)=O	Amino Acids	Leucine, Isoleucine and Valine Metabolism	Sensitivity	MR Egger	-	-	-	-	-	-	-	-	4	0.96 (0.43-2.14)	0.930305	-	-	-	-	-	-	-
	2-hydroxy-3-methylvalerate	36746	HMDB00317	164623	-	CC[C@@H](C)[C@@H](O)C(O)=O	Amino Acids	Leucine, Isoleucine and Valine Metabolism	Sensitivity	Weighted median	-	-	-	-	-	-	-	-	4	0.86 (0.64-1.15)	0.30046	-	-	-	-	-	-	-
	2-hydroxy-3-methylvalerate	36746	HMDB00317	164623	-	CC[C@@H](C)[C@@H](O)C(O)=O	Amino Acids	Leucine, Isoleucine and Valine Metabolism	Sensitivity	Weighted mode	-	-	-	-	-	-	-	-	4	0.8 (0.57-1.12)	0.288569	-	-	-	-	-	-	-
	2-hydroxybutyrate (AHB)	21044	HMDB00008	440864	C05984	CC[C@H](O)C(O)=O	Amino Acids	Methionine, Cysteine, SAM and Taurine Metabolism	Primary	Inverse variance weighted (random effects)/ Wald ratio	-	-	-	-	1	0.97 (0.93-1.02)	0.243179	0.537021	-	-	-	-	-	-	-	-	-	-
	2-hydroxybutyrate/2-hydroxyisobutyrate	52281	-	-	-	-	Amino Acids	Glutathione Metabolism	Primary	Inverse variance weighted (random effects)/ Wald ratio	-	-	-	-	-	-	-	-	4	0.97 (0.58-1.63)	0.90683	0.997882	-	-	-	-	-	-
	2-hydroxybutyrate/2-hydroxyisobutyrate	52281	-	-	-	-	Amino Acids	Glutathione Metabolism	Sensitivity	Inverse variance weighted (fixed effects)	-	-	-	-	-	-	-	-	4	0.97 (0.75-1.24)	0.807426	-	-	-	-	-	-	-
	2-hydroxybutyrate/2-hydroxyisobutyrate	52281	-	-	-	-	Amino Acids	Glutathione Metabolism	Sensitivity	Inverse variance weighted (multiplicative random effects)	-	-	-	-	-	-	-	-	4	0.97 (0.58-1.63)	0.90683	-	-	-	-	-	-	-
	2-hydroxybutyrate/2-hydroxyisobutyrate	52281	-	-	-	-	Amino Acids	Glutathione Metabolism	Sensitivity	MR Egger	-	-	-	-	-	-	-	-	4	3.06 (1.54-6.07)	0.0850967	-	-	-	-	-	-	-
	2-hydroxybutyrate/2-hydroxyisobutyrate	52281	-	-	-	-	Amino Acids	Glutathione Metabolism	Sensitivity	Weighted median	-	-	-	-	-	-	-	-	4	1.2 (0.78-1.86)	0.398598	-	-	-	-	-	-	-
	2-hydroxybutyrate/2-hydroxyisobutyrate	52281	-	-	-	-	Amino Acids	Glutathione Metabolism	Sensitivity	Weighted mode	-	-	-	-	-	-	-	-	4	1.47 (0.73-2.96)	0.357814	-	-	-	-	-	-	-
	2-hydroxyglutarate	52294	HMDB00606	43	C02630	OC(CCC(O)=O)C(O)=O	Lipids	Fatty Acid, Dicarboxylate	Primary	Inverse variance weighted (random effects)/ Wald ratio	-	-	-	-	-	-	-	-	6	1.15 (0.96-1.38)	0.128397	0.577784	-	-	-	-	-	-
	2-hydroxyglutarate	52294	HMDB00606	43	C02630	OC(CCC(O)=O)C(O)=O	Lipids	Fatty Acid, Dicarboxylate	Sensitivity	Inverse variance weighted (fixed effects)	-	-	-	-	-	-	-	-	6	1.15 (0.97-1.37)	0.114903	-	-	-	-	-	-	-
	2-hydroxyglutarate	52294	HMDB00606	43	C02630	OC(CCC(O)=O)C(O)=O	Lipids	Fatty Acid, Dicarboxylate	Sensitivity	Inverse variance weighted (multiplicative random effects)	-	-	-	-	-	-	-	-	6	1.15 (0.96-1.38)	0.128397	-	-	-	-	-	-	-
	2-hydroxyglutarate	52294	HMDB00606	43	C02630	OC(CCC(O)=O)C(O)=O	Lipids	Fatty Acid, Dicarboxylate	Sensitivity	MR Egger	-	-	-	-	-	-	-	-	6	1.27 (0.44-3.66)	0.676375	-	-	-	-	-	-	-
	2-hydroxyglutarate	52294	HMDB00606	43	C02630	OC(CCC(O)=O)C(O)=O	Lipids	Fatty Acid, Dicarboxylate	Sensitivity	Weighted median	-	-	-	-	-	-	-	-	6	1.07 (0.86-1.32)	0.559091	-	-	-	-	-	-	-
	2-hydroxyglutarate	52294	HMDB00606	43	C02630	OC(CCC(O)=O)C(O)=O	Lipids	Fatty Acid, Dicarboxylate	Sensitivity	Weighted mode	-	-	-	-	-	-	-	-	6	1.05 (0.77-1.43)	0.773321	-	-	-	-	-	-	-
	2-hydroxyisobutyrate	22030	HMDB00729	4277439	-	CC(C)(O)C([O-])=O	Amino Acids	Leucine, Isoleucine and Valine Metabolism	Primary	Inverse variance weighted (random effects)/ Wald ratio	1	1.03 (0.89-1.19)	0.730895	0.878415	-	-	-	-	-	-	-	-	-	-	-	-	-	-
	2-hydroxyoctanoate	22036	HMDB02264	94180	-	CCCCCCC(O)C(O)=O	Lipids	Fatty Acid, Monohydroxy	Primary	Inverse variance weighted (random effects)/ Wald ratio	-	-	-	-	-	-	-	-	1	1.22 (0.97-1.53)	0.0960068	0.505568	-	-	-	-	-	-
	2-hydroxypalmitate	35675	HMDB31057	92836	-	CCCCCCCCCCCCCC[C@H](O)C(O)=O	Lipids	Fatty Acid, Monohydroxy	Primary	Inverse variance weighted (random effects)/ Wald ratio	-	-	-	-	1	1.02 (0.97-1.07)	0.534146	0.845067	1	1.06 (0.78-1.44)	0.718073	0.994872	2	1.02 (0.97-1.07)	0.501718	0.80765	0	0.797968
	2-hydroxyphenylacetate	1432	HMDB00669	11970	C05852	OC(=O)CC1=C(O)C=CC=C1	Amino Acids	Tyrosine Metabolism	Primary	Inverse variance weighted (random effects)/ Wald ratio	-	-	-	-	-	-	-	-	2	0.87 (0.69-1.09)	0.228989	0.755663	-	-	-	-	-	-
	2-hydroxyphenylacetate	1432	HMDB00669	11970	C05852	OC(=O)CC1=C(O)C=CC=C1	Amino Acids	Tyrosine Metabolism	Sensitivity	Inverse variance weighted (fixed effects)	-	-	-	-	-	-	-	-	2	0.87 (0.69-1.09)	0.228989	-	-	-	-	-	-	-
	2-hydroxyphenylacetate	1432	HMDB00669	11970	C05852	OC(=O)CC1=C(O)C=CC=C1	Amino Acids	Tyrosine Metabolism	Sensitivity	Inverse variance weighted (multiplicative random effects)	-	-	-	-	-	-	-	-	2	0.87 (0.8-0.95)	0.00134277	-	-	-	-	-	-	-
	2-hydroxystearate	17945	HMDB0062549	69417	C03045	CCCCCCCCCCCCCCCC[C@H](O)C(O)=O	Lipids	Fatty Acid, Monohydroxy	Primary	Inverse variance weighted (random effects)/ Wald ratio	1	1.11 (0.96-1.28)	0.168744	0.863252	1	1.09 (1.02-1.16)	0.00769577	0.101969	2	1.02 (0.76-1.38)	0.882238	0.997496	3	1.09 (1.03-1.15)	0.00302324	0.0289387	0	0.893497
	2-hydroxystearate	17945	HMDB0062549	69417	C03045	CCCCCCCCCCCCCCCC[C@H](O)C(O)=O	Lipids	Fatty Acid, Monohydroxy	Sensitivity	Inverse variance weighted (fixed effects)	-	-	-	-	-	-	-	-	2	1.02 (0.76-1.38)	0.882238	-	-	-	-	-	-	-
	2-hydroxystearate	17945	HMDB0062549	69417	C03045	CCCCCCCCCCCCCCCC[C@H](O)C(O)=O	Lipids	Fatty Acid, Monohydroxy	Sensitivity	Inverse variance weighted (multiplicative random effects)	-	-	-	-	-	-	-	-	2	1.02 (0.79-1.33)	0.865686	-	-	-	-	-	-	-
	2-linoleoylglycerol (18:2)	32506	HMDB11538	5365676	-	[H]C(CO)(CO)OC(=O)CCCCCCC\C=C/C\C=C/CCCCC	Lipids	Monoacylglycerol	Primary	Inverse variance weighted (random effects)/ Wald ratio	-	-	-	-	-	-	-	-	1	0.95 (0.61-1.47)	0.818746	0.994872	-	-	-	-	-	-
	2-linoleoylglycerophosphocholine*	-	-	-	-	-	Lipids	Lysolipid	Primary	Inverse variance weighted (random effects)/ Wald ratio	2	0.98 (0.88-1.09)	0.661753	0.878415	1	0.99 (0.93-1.06)	0.844804	0.95162	-	-	-	-	2	0.99 (0.93-1.05)	0.693503	0.886217	0	0.785047
	2-linoleoylglycerophosphocholine*	-	-	-	-	-	Lipids	Lysolipid	Sensitivity	Inverse variance weighted (fixed effects)	2	0.98 (0.88-1.09)	0.661753	-	-	-	-	-	-	-	-	-	-	-	-	-	-	-
	2-linoleoylglycerophosphocholine*	-	-	-	-	-	Lipids	Lysolipid	Sensitivity	Inverse variance weighted (multiplicative random effects)	2	0.98 (0.9-1.05)	0.534726	-	-	-	-	-	-	-	-	-	-	-	-	-	-	-
	2-linoleoylglycerophosphoethanolamine*	-	-	-	-	-	Lipids	Lysolipid	Primary	Inverse variance weighted (random effects)/ Wald ratio	1	0.93 (0.77-1.11)	0.412418	0.863252	1	0.95 (0.91-1)	0.065142	0.287844	-	-	-	-	2	0.95 (0.91-1)	0.04605	0.195479	0	0.760044
	2-methylbutyrylcarnitine (C5)	45095	HMDB00378	6426901	-	CCC(C)C(=O)OC(CC([O-])=O)C[N+](C)(C)C	Amino Acids	Leucine, Isoleucine and Valine Metabolism	Primary	Inverse variance weighted (random effects)/ Wald ratio	-	-	-	-	-	-	-	-	3	1.13 (0.88-1.45)	0.329119	0.893079	-	-	-	-	-	-
	2-methylbutyrylcarnitine (C5)	45095	HMDB00378	6426901	-	CCC(C)C(=O)OC(CC([O-])=O)C[N+](C)(C)C	Amino Acids	Leucine, Isoleucine and Valine Metabolism	Sensitivity	Inverse variance weighted (fixed effects)	-	-	-	-	-	-	-	-	3	1.13 (0.88-1.45)	0.329119	-	-	-	-	-	-	-
	2-methylbutyrylcarnitine (C5)	45095	HMDB00378	6426901	-	CCC(C)C(=O)OC(CC([O-])=O)C[N+](C)(C)C	Amino Acids	Leucine, Isoleucine and Valine Metabolism	Sensitivity	Inverse variance weighted (multiplicative random effects)	-	-	-	-	-	-	-	-	3	1.13 (0.97-1.32)	0.113365	-	-	-	-	-	-	-
	2-methylbutyrylcarnitine (C5)	45095	HMDB00378	6426901	-	CCC(C)C(=O)OC(CC([O-])=O)C[N+](C)(C)C	Amino Acids	Leucine, Isoleucine and Valine Metabolism	Sensitivity	MR Egger	-	-	-	-	-	-	-	-	3	0.23 (0-17.62)	0.624826	-	-	-	-	-	-	-
	2-methylbutyrylcarnitine (C5)	45095	HMDB00378	6426901	-	CCC(C)C(=O)OC(CC([O-])=O)C[N+](C)(C)C	Amino Acids	Leucine, Isoleucine and Valine Metabolism	Sensitivity	Weighted median	-	-	-	-	-	-	-	-	3	1.15 (0.86-1.53)	0.337367	-	-	-	-	-	-	-
	2-methylbutyrylcarnitine (C5)	45095	HMDB00378	6426901	-	CCC(C)C(=O)OC(CC([O-])=O)C[N+](C)(C)C	Amino Acids	Leucine, Isoleucine and Valine Metabolism	Sensitivity	Weighted mode	-	-	-	-	-	-	-	-	3	1.23 (0.85-1.78)	0.393828	-	-	-	-	-	-	-
	2-methylcitrate/homocitrate	52282	-	-	-	-	Energy	TCA Cycle	Primary	Inverse variance weighted (random effects)/ Wald ratio	-	-	-	-	-	-	-	-	1	0.7 (0.43-1.12)	0.13544	0.598595	-	-	-	-	-	-
	2-oxindole-3-acetate	40479	HMDB35514	3080590	-	OC(=O)CC1C(O)=NC2=C1C=CC=C2	Xenobiotics	Food Component/Plant	Primary	Inverse variance weighted (random effects)/ Wald ratio	-	-	-	-	-	-	-	-	1	0.75 (0.49-1.17)	0.204404	0.722713	-	-	-	-	-	-
	2-oxoarginine*	55072	HMDB04225	558	C03771	NC(N)=NCCCC(=O)C(O)=O	Amino Acids	Urea cycle; Arginine and Proline Metabolism	Primary	Inverse variance weighted (random effects)/ Wald ratio	-	-	-	-	-	-	-	-	1	0.8 (0.51-1.25)	0.32495	0.893079	-	-	-	-	-	-
	2-palmitoyl-GPC (16:0)*	35253	HMDB61702	15061532		CCCCCCCCCCCCCCCC(=O)O[C@H](CO)COP([O-])(=O)OCC[N+](C)(C)C	Lipids	Lysophospholipid	Primary	Inverse variance weighted (random effects)/ Wald ratio	1	0.91 (0.77-1.06)	0.219895	0.863252	-	-	-	-	1	0.95 (0.63-1.44)	0.818722	0.994872	2	0.91 (0.79-1.06)	0.219774	0.571237	0	0.820163
	2-palmitoylglycerophosphoethanolamine*	-	HMDB0011473	53480922	-	[H][C@@](CO)(COP(O)(=O)OCCN)OC(=O)CCCCCCCCCCCCCCC	Lipids	Lysolipid	Primary	Inverse variance weighted (random effects)/ Wald ratio	1	1 (0.88-1.15)	0.964551	0.987158	3	1.01 (0.98-1.04)	0.460878	0.814218	-	-	-	-	2	1.01 (0.98-1.03)	0.463422	0.78929	0	0.928292
	2-palmitoylglycerophosphoethanolamine*	-	HMDB0011473	53480922	-	[H][C@@](CO)(COP(O)(=O)OCCN)OC(=O)CCCCCCCCCCCCCCC	Lipids	Lysolipid	Sensitivity	Inverse variance weighted (fixed effects)	-	-	-	-	3	1.01 (0.98-1.04)	0.460878	-	-	-	-	-	-	-	-	-	-	-
	2-palmitoylglycerophosphoethanolamine*	-	HMDB0011473	53480922	-	[H][C@@](CO)(COP(O)(=O)OCCN)OC(=O)CCCCCCCCCCCCCCC	Lipids	Lysolipid	Sensitivity	Inverse variance weighted (multiplicative random effects)	-	-	-	-	3	1.01 (0.99-1.03)	0.35874	-	-	-	-	-	-	-	-	-	-	-
	2-palmitoylglycerophosphoethanolamine*	-	HMDB0011473	53480922	-	[H][C@@](CO)(COP(O)(=O)OCCN)OC(=O)CCCCCCCCCCCCCCC	Lipids	Lysolipid	Sensitivity	MR Egger	-	-	-	-	3	0.9 (0.65-1.24)	0.63152	-	-	-	-	-	-	-	-	-	-	-
	2-palmitoylglycerophosphoethanolamine*	-	HMDB0011473	53480922	-	[H][C@@](CO)(COP(O)(=O)OCCN)OC(=O)CCCCCCCCCCCCCCC	Lipids	Lysolipid	Sensitivity	Weighted median	-	-	-	-	3	1.01 (0.98-1.04)	0.683176	-	-	-	-	-	-	-	-	-	-	-
	2-palmitoylglycerophosphoethanolamine*	-	HMDB0011473	53480922	-	[H][C@@](CO)(COP(O)(=O)OCCN)OC(=O)CCCCCCCCCCCCCCC	Lipids	Lysolipid	Sensitivity	Weighted mode	-	-	-	-	3	1 (0.97-1.04)	0.979704	-	-	-	-	-	-	-	-	-	-	-
	2-stearoyl-GPE (18:0)*	41220	HMDB11129	53480667	-	[H][C@@](CO)(COP(O)(=O)OCCN)OC(=O)CCCCCCCCCCCCCCCCC	Lipids	Lysophospholipid	Primary	Inverse variance weighted (random effects)/ Wald ratio	-	-	-	-	-	-	-	-	4	1 (0.84-1.21)	0.963052	0.999026	-	-	-	-	-	-
	2-stearoyl-GPE (18:0)*	41220	HMDB11129	53480667	-	[H][C@@](CO)(COP(O)(=O)OCCN)OC(=O)CCCCCCCCCCCCCCCCC	Lipids	Lysophospholipid	Sensitivity	Inverse variance weighted (fixed effects)	-	-	-	-	-	-	-	-	4	1 (0.84-1.21)	0.963052	-	-	-	-	-	-	-
	2-stearoyl-GPE (18:0)*	41220	HMDB11129	53480667	-	[H][C@@](CO)(COP(O)(=O)OCCN)OC(=O)CCCCCCCCCCCCCCCCC	Lipids	Lysophospholipid	Sensitivity	Inverse variance weighted (multiplicative random effects)	-	-	-	-	-	-	-	-	4	1 (0.94-1.08)	0.904418	-	-	-	-	-	-	-
	2-stearoyl-GPE (18:0)*	41220	HMDB11129	53480667	-	[H][C@@](CO)(COP(O)(=O)OCCN)OC(=O)CCCCCCCCCCCCCCCCC	Lipids	Lysophospholipid	Sensitivity	MR Egger	-	-	-	-	-	-	-	-	4	1.25 (0.62-2.52)	0.591525	-	-	-	-	-	-	-
	2-stearoyl-GPE (18:0)*	41220	HMDB11129	53480667	-	[H][C@@](CO)(COP(O)(=O)OCCN)OC(=O)CCCCCCCCCCCCCCCCC	Lipids	Lysophospholipid	Sensitivity	Weighted median	-	-	-	-	-	-	-	-	4	0.99 (0.81-1.21)	0.925132	-	-	-	-	-	-	-
	2-stearoyl-GPE (18:0)*	41220	HMDB11129	53480667	-	[H][C@@](CO)(COP(O)(=O)OCCN)OC(=O)CCCCCCCCCCCCCCCCC	Lipids	Lysophospholipid	Sensitivity	Weighted mode	-	-	-	-	-	-	-	-	4	0.99 (0.77-1.26)	0.932208	-	-	-	-	-	-	-
	21-hydroxypregnenolone disulfate	46115	HMDB04026	134595	C05485	[H][C@@]12CC[C@H](C(=O)CO)[C@@]1(C)CC[C@@]1([H])[C@@]2([H])CC=C2C[C@@H](O)CC[C@]12C	Lipids	Pregnenolone Steroids	Primary	Inverse variance weighted (random effects)/ Wald ratio	1	0.87 (0.75-1)	0.0524964	0.764114	-	-	-	-	2	0.9 (0.7-1.16)	0.424504	0.987241	2	0.87 (0.77-0.99)	0.0374966	0.188925	0	0.791606
	21-hydroxypregnenolone disulfate	46115	HMDB04026	134595	C05485	[H][C@@]12CC[C@H](C(=O)CO)[C@@]1(C)CC[C@@]1([H])[C@@]2([H])CC=C2C[C@@H](O)CC[C@]12C	Lipids	Pregnenolone Steroids	Sensitivity	Inverse variance weighted (fixed effects)	-	-	-	-	-	-	-	-	2	0.9 (0.7-1.16)	0.424504	-	-	-	-	-	-	-
	21-hydroxypregnenolone disulfate	46115	HMDB04026	134595	C05485	[H][C@@]12CC[C@H](C(=O)CO)[C@@]1(C)CC[C@@]1([H])[C@@]2([H])CC=C2C[C@@H](O)CC[C@]12C	Lipids	Pregnenolone Steroids	Sensitivity	Inverse variance weighted (multiplicative random effects)	-	-	-	-	-	-	-	-	2	0.9 (0.71-1.14)	0.390669	-	-	-	-	-	-	-
	21-hydroxypregnenolone monosulfate	-	-	-	-	-	Lipids	Pregnenolone Steroids	Primary	Inverse variance weighted (random effects)/ Wald ratio	-	-	-	-	-	-	-	-	1	0.93 (0.69-1.25)	0.640406	0.994872	-	-	-	-	-	-
	3-(4-hydroxyphenyl)lactate	32197	HMDB00755	9378	C03672	OC(CC1=CC=C(O)C=C1)C(O)=O	Amino Acids	Tyrosine Metabolism	Primary	Inverse variance weighted (random effects)/ Wald ratio	-	-	-	-	-	-	-	-	2	1.44 (1.06-1.95)	0.0200539	0.157566	-	-	-	-	-	-
	3-(4-hydroxyphenyl)lactate	32197	HMDB00755	9378	C03672	OC(CC1=CC=C(O)C=C1)C(O)=O	Amino Acids	Tyrosine Metabolism	Sensitivity	Inverse variance weighted (fixed effects)	-	-	-	-	-	-	-	-	2	1.44 (1.06-1.95)	0.0200539	-	-	-	-	-	-	-
	3-(4-hydroxyphenyl)lactate	32197	HMDB00755	9378	C03672	OC(CC1=CC=C(O)C=C1)C(O)=O	Amino Acids	Tyrosine Metabolism	Sensitivity	Inverse variance weighted (multiplicative random effects)	-	-	-	-	-	-	-	-	2	1.44 (1.25-1.65)	2.50934e-07	-	-	-	-	-	-	-
	3-aminoisobutyrate	1566	HMDB03911	64956	C05145	CC(CN)C(O)=O	Nucleotides	Pyrimidine Metabolism, Thymine containing	Primary	Inverse variance weighted (random effects)/ Wald ratio	-	-	-	-	-	-	-	-	30	0.98 (0.94-1.02)	0.393516	0.977965	-	-	-	-	-	-
	3-aminoisobutyrate	1566	HMDB03911	64956	C05145	CC(CN)C(O)=O	Nucleotides	Pyrimidine Metabolism, Thymine containing	Sensitivity	Inverse variance weighted (fixed effects)	-	-	-	-	-	-	-	-	30	0.98 (0.94-1.02)	0.393516	-	-	-	-	-	-	-
	3-aminoisobutyrate	1566	HMDB03911	64956	C05145	CC(CN)C(O)=O	Nucleotides	Pyrimidine Metabolism, Thymine containing	Sensitivity	Inverse variance weighted (multiplicative random effects)	-	-	-	-	-	-	-	-	30	0.98 (0.94-1.02)	0.379339	-	-	-	-	-	-	-
	3-aminoisobutyrate	1566	HMDB03911	64956	C05145	CC(CN)C(O)=O	Nucleotides	Pyrimidine Metabolism, Thymine containing	Sensitivity	MR Egger	-	-	-	-	-	-	-	-	30	0.97 (0.91-1.04)	0.385605	-	-	-	-	-	-	-
	3-aminoisobutyrate	1566	HMDB03911	64956	C05145	CC(CN)C(O)=O	Nucleotides	Pyrimidine Metabolism, Thymine containing	Sensitivity	Weighted median	-	-	-	-	-	-	-	-	30	0.96 (0.9-1.03)	0.238594	-	-	-	-	-	-	-
	3-aminoisobutyrate	1566	HMDB03911	64956	C05145	CC(CN)C(O)=O	Nucleotides	Pyrimidine Metabolism, Thymine containing	Sensitivity	Weighted mode	-	-	-	-	-	-	-	-	30	0.97 (0.92-1.02)	0.285091	-	-	-	-	-	-	-
	3-carboxy-4-methyl-5-propyl-2-furanpropanoate (CMPF)	31787	HMDB61112	123979	-	CCCC1=C(C)C(C(O)=O)=C(CCC(O)=O)O1	Lipids	Fatty Acid, Dicarboxylate	Primary	Inverse variance weighted (random effects)/ Wald ratio	2	1.03 (0.93-1.15)	0.55522	0.863348	-	-	-	-	-	-	-	-	-	-	-	-	-	-
	3-carboxy-4-methyl-5-propyl-2-furanpropanoate (CMPF)	31787	HMDB61112	123979	-	CCCC1=C(C)C(C(O)=O)=C(CCC(O)=O)O1	Lipids	Fatty Acid, Dicarboxylate	Sensitivity	Inverse variance weighted (fixed effects)	2	1.03 (0.93-1.15)	0.55522	-	-	-	-	-	-	-	-	-	-	-	-	-	-	-
	3-carboxy-4-methyl-5-propyl-2-furanpropanoate (CMPF)	31787	HMDB61112	123979	-	CCCC1=C(C)C(C(O)=O)=C(CCC(O)=O)O1	Lipids	Fatty Acid, Dicarboxylate	Sensitivity	Inverse variance weighted (multiplicative random effects)	2	1.03 (0.94-1.13)	0.51327	-	-	-	-	-	-	-	-	-	-	-	-	-	-	-
	3-hydroxy-2-ethylpropionate	32397	HMDB00396	188979	-	CCC(CO)C(O)=O	Amino Acids	Leucine, Isoleucine and Valine Metabolism	Primary	Inverse variance weighted (random effects)/ Wald ratio	1	1.04 (0.9-1.2)	0.591891	0.870677	-	-	-	-	1	0.87 (0.6-1.26)	0.459025	0.987241	2	1.02 (0.89-1.16)	0.814991	0.939606	0	0.376869
	3-hydroxybutyrate (BHBA)	542	HMDB00357	441	C01089	C[C@@H](O)CC(O)=O	Lipids	Ketone bodies	Primary	Inverse variance weighted (random effects)/ Wald ratio	2	1.04 (0.93-1.16)	0.47188	0.863252	-	-	-	-	-	-	-	-	-	-	-	-	-	-
	3-hydroxybutyrate (BHBA)	542	HMDB00357	441	C01089	C[C@@H](O)CC(O)=O	Lipids	Ketone bodies	Sensitivity	Inverse variance weighted (fixed effects)	2	1.04 (0.93-1.16)	0.47188	-	-	-	-	-	-	-	-	-	-	-	-	-	-	-
	3-hydroxybutyrate (BHBA)	542	HMDB00357	441	C01089	C[C@@H](O)CC(O)=O	Lipids	Ketone bodies	Sensitivity	Inverse variance weighted (multiplicative random effects)	2	1.04 (0.97-1.11)	0.234541	-	-	-	-	-	-	-	-	-	-	-	-	-	-	-
	3-hydroxybutyrylcarnitine (2)	43264	HMDB13127	53481617		C[C@@H](O)CC(=O)O[C@@H](CC([O-])=O)C[N+](C)(C)C	Lipids	Fatty Acid Metabolism (Acyl Carnitine)	Primary	Inverse variance weighted (random effects)/ Wald ratio	-	-	-	-	-	-	-	-	1	0.96 (0.69-1.33)	0.805104	0.994872	-	-	-	-	-	-
	3-hydroxydecanoate	22053	HMDB02203	26612	-	CCCCCCC[C@H](O)CC(O)=O	Lipids	Fatty Acid, Monohydroxy	Primary	Inverse variance weighted (random effects)/ Wald ratio	2	1.08 (1-1.16)	0.0367705	0.610482	1	1.07 (1.02-1.12)	0.00353561	0.0687837	1	1.22 (0.99-1.51)	0.063945	0.365987	3	1.08 (1.04-1.12)	0.000120003	0.00262006	0	0.470505
	3-hydroxydecanoate	22053	HMDB02203	26612	-	CCCCCCC[C@H](O)CC(O)=O	Lipids	Fatty Acid, Monohydroxy	Sensitivity	Inverse variance weighted (fixed effects)	2	1.08 (1-1.16)	0.0367705	-	-	-	-	-	-	-	-	-	-	-	-	-	-	-
	3-hydroxydecanoate	22053	HMDB02203	26612	-	CCCCCCC[C@H](O)CC(O)=O	Lipids	Fatty Acid, Monohydroxy	Sensitivity	Inverse variance weighted (multiplicative random effects)	2	1.08 (1.04-1.12)	5.5951e-05	-	-	-	-	-	-	-	-	-	-	-	-	-	-	-
	3-hydroxyhexanoate	53230	HMDB0010718	151492	-	CCC[C@@H](O)CC(O)=O	Lipids	Fatty Acid, Monohydroxy	Primary	Inverse variance weighted (random effects)/ Wald ratio	-	-	-	-	-	-	-	-	3	1.09 (0.86-1.4)	0.46534	0.987241	-	-	-	-	-	-
	3-hydroxyhexanoate	53230	HMDB0010718	151492	-	CCC[C@@H](O)CC(O)=O	Lipids	Fatty Acid, Monohydroxy	Sensitivity	Inverse variance weighted (fixed effects)	-	-	-	-	-	-	-	-	3	1.09 (0.86-1.4)	0.46534	-	-	-	-	-	-	-
	3-hydroxyhexanoate	53230	HMDB0010718	151492	-	CCC[C@@H](O)CC(O)=O	Lipids	Fatty Acid, Monohydroxy	Sensitivity	Inverse variance weighted (multiplicative random effects)	-	-	-	-	-	-	-	-	3	1.09 (0.87-1.37)	0.430933	-	-	-	-	-	-	-
	3-hydroxyhexanoate	53230	HMDB0010718	151492	-	CCC[C@@H](O)CC(O)=O	Lipids	Fatty Acid, Monohydroxy	Sensitivity	MR Egger	-	-	-	-	-	-	-	-	3	0.8 (0.47-1.37)	0.566008	-	-	-	-	-	-	-
	3-hydroxyhexanoate	53230	HMDB0010718	151492	-	CCC[C@@H](O)CC(O)=O	Lipids	Fatty Acid, Monohydroxy	Sensitivity	Weighted median	-	-	-	-	-	-	-	-	3	1.06 (0.78-1.43)	0.713861	-	-	-	-	-	-	-
	3-hydroxyhexanoate	53230	HMDB0010718	151492	-	CCC[C@@H](O)CC(O)=O	Lipids	Fatty Acid, Monohydroxy	Sensitivity	Weighted mode	-	-	-	-	-	-	-	-	3	1 (0.66-1.51)	0.998471	-	-	-	-	-	-	-
	3-hydroxylaurate	32457	HMDB00387	94216	-	CCCCCCCCC[C@H](O)CC(O)=O	Lipids	Fatty Acid, Monohydroxy	Primary	Inverse variance weighted (random effects)/ Wald ratio	-	-	-	-	-	-	-	-	2	1.18 (0.87-1.6)	0.296385	0.860923	-	-	-	-	-	-
	3-hydroxylaurate	32457	HMDB00387	94216	-	CCCCCCCCC[C@H](O)CC(O)=O	Lipids	Fatty Acid, Monohydroxy	Sensitivity	Inverse variance weighted (fixed effects)	-	-	-	-	-	-	-	-	2	1.18 (0.87-1.6)	0.296385	-	-	-	-	-	-	-
	3-hydroxylaurate	32457	HMDB00387	94216	-	CCCCCCCCC[C@H](O)CC(O)=O	Lipids	Fatty Acid, Monohydroxy	Sensitivity	Inverse variance weighted (multiplicative random effects)	-	-	-	-	-	-	-	-	2	1.18 (1.14-1.21)	1.8584e-24	-	-	-	-	-	-	-
	3-hydroxyoctanoate	22001	HMDB01954	26613	-	CCCCC[C@H](O)CC(O)=O	Lipids	Fatty Acid, Monohydroxy	Primary	Inverse variance weighted (random effects)/ Wald ratio	-	-	-	-	-	-	-	-	1	1.24 (0.91-1.69)	0.169691	0.656583	-	-	-	-	-	-
	3-hydroxypyridine sulfate	48448	-	-	-	-	Xenobiotics	Chemical	Primary	Inverse variance weighted (random effects)/ Wald ratio	-	-	-	-	-	-	-	-	1	0.77 (0.44-1.34)	0.358628	0.939264	-	-	-	-	-	-
	3-hydroxysebacate	31943	HMDB00350	3017884	-	O[C@H](CCCCCCC(O)=O)CC(O)=O	Lipids	Fatty Acid, Monohydroxy	Primary	Inverse variance weighted (random effects)/ Wald ratio	-	-	-	-	-	-	-	-	2	1.03 (0.83-1.28)	0.812074	0.994872	-	-	-	-	-	-
	3-hydroxysebacate	31943	HMDB00350	3017884	-	O[C@H](CCCCCCC(O)=O)CC(O)=O	Lipids	Fatty Acid, Monohydroxy	Sensitivity	Inverse variance weighted (fixed effects)	-	-	-	-	-	-	-	-	2	1.03 (0.84-1.25)	0.791215	-	-	-	-	-	-	-
	3-hydroxysebacate	31943	HMDB00350	3017884	-	O[C@H](CCCCCCC(O)=O)CC(O)=O	Lipids	Fatty Acid, Monohydroxy	Sensitivity	Inverse variance weighted (multiplicative random effects)	-	-	-	-	-	-	-	-	2	1.03 (0.83-1.28)	0.812074	-	-	-	-	-	-	-
	3-indoxyl sulfate	27672	HMDB00682	10258	-	OS(=O)(=O)OC1=CNC2=CC=CC=C12	Amino Acids	Tryptophan Metabolism	Primary	Inverse variance weighted (random effects)/ Wald ratio	1	0.94 (0.81-1.08)	0.378588	0.863252	-	-	-	-	-	-	-	-	-	-	-	-	-	-
	3-methoxycatechol sulfate (1)	48763	-	-	-	-	Xenobiotics	Benzoate Metabolism	Primary	Inverse variance weighted (random effects)/ Wald ratio	-	-	-	-	-	-	-	-	2	0.74 (0.47-1.15)	0.177901	0.67222	-	-	-	-	-	-
	3-methoxycatechol sulfate (1)	48763	-	-	-	-	Xenobiotics	Benzoate Metabolism	Sensitivity	Inverse variance weighted (fixed effects)	-	-	-	-	-	-	-	-	2	0.74 (0.5-1.09)	0.12561	-	-	-	-	-	-	-
	3-methoxycatechol sulfate (1)	48763	-	-	-	-	Xenobiotics	Benzoate Metabolism	Sensitivity	Inverse variance weighted (multiplicative random effects)	-	-	-	-	-	-	-	-	2	0.74 (0.47-1.15)	0.177901	-	-	-	-	-	-	-
	3-methoxytyramine sulfate	44618	-	-	-	-	Amino Acids	Tyrosine Metabolism	Primary	Inverse variance weighted (random effects)/ Wald ratio	-	-	-	-	-	-	-	-	2	1.2 (0.48-2.99)	0.701851	0.994872	-	-	-	-	-	-
	3-methoxytyramine sulfate	44618	-	-	-	-	Amino Acids	Tyrosine Metabolism	Sensitivity	Inverse variance weighted (fixed effects)	-	-	-	-	-	-	-	-	2	1.2 (0.93-1.53)	0.159069	-	-	-	-	-	-	-
	3-methoxytyramine sulfate	44618	-	-	-	-	Amino Acids	Tyrosine Metabolism	Sensitivity	Inverse variance weighted (multiplicative random effects)	-	-	-	-	-	-	-	-	2	1.2 (0.48-2.99)	0.701851	-	-	-	-	-	-	-
	3-methoxytyrosine	12017	HMDB01434	1670	-	COC1=C(O)C=CC(CC(N)C(O)=O)=C1	Amino Acids	Tyrosine Metabolism	Primary	Inverse variance weighted (random effects)/ Wald ratio	1	0.98 (0.89-1.07)	0.604821	0.870677	1	1.48 (1.28-1.71)	7.60743e-08	8.07e-06	2	1.46 (0.79-2.72)	0.227396	0.755663	3	1.1 (1.02-1.19)	0.0102353	0.0744905	91.6784	6.04128e-06
	3-methoxytyrosine	12017	HMDB01434	1670	-	COC1=C(O)C=CC(CC(N)C(O)=O)=C1	Amino Acids	Tyrosine Metabolism	Sensitivity	Inverse variance weighted (fixed effects)	-	-	-	-	-	-	-	-	2	1.46 (1.09-1.97)	0.0111535	-	-	-	-	-	-	-
	3-methoxytyrosine	12017	HMDB01434	1670	-	COC1=C(O)C=CC(CC(N)C(O)=O)=C1	Amino Acids	Tyrosine Metabolism	Sensitivity	Inverse variance weighted (multiplicative random effects)	-	-	-	-	-	-	-	-	2	1.46 (0.79-2.72)	0.227396	-	-	-	-	-	-	-
	3-methyl catechol sulfate (1)	46165	-	-	-	-	Xenobiotics	Benzoate Metabolism	Primary	Inverse variance weighted (random effects)/ Wald ratio	-	-	-	-	-	-	-	-	1	1.88 (0.87-4.09)	0.109439	0.526474	-	-	-	-	-	-
	3-methyl-2-oxobutyrate	44526	HMDB00019	49	C00141	CC(C)C(=O)C(O)=O	Amino Acids	Leucine, Isoleucine and Valine Metabolism	Primary	Inverse variance weighted (random effects)/ Wald ratio	-	-	-	-	-	-	-	-	2	0.71 (0.42-1.22)	0.215636	0.742758	-	-	-	-	-	-
	3-methyl-2-oxobutyrate	44526	HMDB00019	49	C00141	CC(C)C(=O)C(O)=O	Amino Acids	Leucine, Isoleucine and Valine Metabolism	Sensitivity	Inverse variance weighted (fixed effects)	-	-	-	-	-	-	-	-	2	0.71 (0.53-0.96)	0.0246192	-	-	-	-	-	-	-
	3-methyl-2-oxobutyrate	44526	HMDB00019	49	C00141	CC(C)C(=O)C(O)=O	Amino Acids	Leucine, Isoleucine and Valine Metabolism	Sensitivity	Inverse variance weighted (multiplicative random effects)	-	-	-	-	-	-	-	-	2	0.71 (0.42-1.22)	0.215636	-	-	-	-	-	-	-
	3-methyl-2-oxovalerate	15676	HMDB03736	47	C00671	-	Amino Acids	Leucine, Isoleucine and Valine Metabolism	Primary	Inverse variance weighted (random effects)/ Wald ratio	-	-	-	-	-	-	-	-	2	0.7 (0.46-1.07)	0.097292	0.506943	-	-	-	-	-	-
	3-methyl-2-oxovalerate	15676	HMDB03736	47	C00671	-	Amino Acids	Leucine, Isoleucine and Valine Metabolism	Sensitivity	Inverse variance weighted (fixed effects)	-	-	-	-	-	-	-	-	2	0.7 (0.52-0.93)	0.0133736	-	-	-	-	-	-	-
	3-methyl-2-oxovalerate	15676	HMDB03736	47	C00671	-	Amino Acids	Leucine, Isoleucine and Valine Metabolism	Sensitivity	Inverse variance weighted (multiplicative random effects)	-	-	-	-	-	-	-	-	2	0.7 (0.46-1.07)	0.097292	-	-	-	-	-	-	-
	3-methylglutaconate	57747	HMDB00522	1551553	-	C\C(CC(O)=O)=C/C(O)=O	Amino Acids	Leucine, Isoleucine and Valine Metabolism	Primary	Inverse variance weighted (random effects)/ Wald ratio	-	-	-	-	-	-	-	-	14	1.03 (0.95-1.11)	0.491055	0.987241	-	-	-	-	-	-
	3-methylglutaconate	57747	HMDB00522	1551553	-	C\C(CC(O)=O)=C/C(O)=O	Amino Acids	Leucine, Isoleucine and Valine Metabolism	Sensitivity	Inverse variance weighted (fixed effects)	-	-	-	-	-	-	-	-	14	1.03 (0.96-1.1)	0.454266	-	-	-	-	-	-	-
	3-methylglutaconate	57747	HMDB00522	1551553	-	C\C(CC(O)=O)=C/C(O)=O	Amino Acids	Leucine, Isoleucine and Valine Metabolism	Sensitivity	Inverse variance weighted (multiplicative random effects)	-	-	-	-	-	-	-	-	14	1.03 (0.95-1.11)	0.491055	-	-	-	-	-	-	-
	3-methylglutaconate	57747	HMDB00522	1551553	-	C\C(CC(O)=O)=C/C(O)=O	Amino Acids	Leucine, Isoleucine and Valine Metabolism	Sensitivity	MR Egger	-	-	-	-	-	-	-	-	14	1.13 (0.96-1.34)	0.166806	-	-	-	-	-	-	-
	3-methylglutaconate	57747	HMDB00522	1551553	-	C\C(CC(O)=O)=C/C(O)=O	Amino Acids	Leucine, Isoleucine and Valine Metabolism	Sensitivity	Weighted median	-	-	-	-	-	-	-	-	14	0.99 (0.9-1.09)	0.852019	-	-	-	-	-	-	-
	3-methylglutaconate	57747	HMDB00522	1551553	-	C\C(CC(O)=O)=C/C(O)=O	Amino Acids	Leucine, Isoleucine and Valine Metabolism	Sensitivity	Weighted mode	-	-	-	-	-	-	-	-	14	1.01 (0.9-1.13)	0.928614	-	-	-	-	-	-	-
	3-methylglutarylcarnitine (2)	46548	HMDB00552	128145	-	C[C@H](CC(O)=O)CC(=O)O[C@H](CC([O-])=O)C[N+](C)(C)C	Amino Acids	Leucine, Isoleucine and Valine Metabolism	Primary	Inverse variance weighted (random effects)/ Wald ratio	-	-	-	-	-	-	-	-	16	1.06 (0.98-1.14)	0.169929	0.656583	-	-	-	-	-	-
	3-methylglutarylcarnitine (2)	46548	HMDB00552	128145	-	C[C@H](CC(O)=O)CC(=O)O[C@H](CC([O-])=O)C[N+](C)(C)C	Amino Acids	Leucine, Isoleucine and Valine Metabolism	Sensitivity	Inverse variance weighted (fixed effects)	-	-	-	-	-	-	-	-	16	1.06 (0.98-1.14)	0.169929	-	-	-	-	-	-	-
	3-methylglutarylcarnitine (2)	46548	HMDB00552	128145	-	C[C@H](CC(O)=O)CC(=O)O[C@H](CC([O-])=O)C[N+](C)(C)C	Amino Acids	Leucine, Isoleucine and Valine Metabolism	Sensitivity	Inverse variance weighted (multiplicative random effects)	-	-	-	-	-	-	-	-	16	1.06 (0.98-1.14)	0.163703	-	-	-	-	-	-	-
	3-methylglutarylcarnitine (2)	46548	HMDB00552	128145	-	C[C@H](CC(O)=O)CC(=O)O[C@H](CC([O-])=O)C[N+](C)(C)C	Amino Acids	Leucine, Isoleucine and Valine Metabolism	Sensitivity	MR Egger	-	-	-	-	-	-	-	-	16	1.06 (0.85-1.32)	0.602441	-	-	-	-	-	-	-
	3-methylglutarylcarnitine (2)	46548	HMDB00552	128145	-	C[C@H](CC(O)=O)CC(=O)O[C@H](CC([O-])=O)C[N+](C)(C)C	Amino Acids	Leucine, Isoleucine and Valine Metabolism	Sensitivity	Weighted median	-	-	-	-	-	-	-	-	16	1.02 (0.91-1.14)	0.765951	-	-	-	-	-	-	-
	3-methylglutarylcarnitine (2)	46548	HMDB00552	128145	-	C[C@H](CC(O)=O)CC(=O)O[C@H](CC([O-])=O)C[N+](C)(C)C	Amino Acids	Leucine, Isoleucine and Valine Metabolism	Sensitivity	Weighted mode	-	-	-	-	-	-	-	-	16	0.97 (0.84-1.11)	0.671474	-	-	-	-	-	-	-
	3-methylhistidine	15677	HMDB00479	64969	C01152	[H][C@](N)(CC1=CN=CN1C)C(O)=O	Amino Acids	Histidine Metabolism	Primary	Inverse variance weighted (random effects)/ Wald ratio	2	1.05 (0.96-1.16)	0.27486	0.863252	-	-	-	-	1	2.01 (1.19-3.41)	0.00958267	0.111969	2	1.07 (0.98-1.18)	0.127243	0.416722	82.0695	0.0181969
	3-methylhistidine	15677	HMDB00479	64969	C01152	[H][C@](N)(CC1=CN=CN1C)C(O)=O	Amino Acids	Histidine Metabolism	Sensitivity	Inverse variance weighted (fixed effects)	2	1.05 (0.96-1.16)	0.27486	-	-	-	-	-	-	-	-	-	-	-	-	-	-	-
	3-methylhistidine	15677	HMDB00479	64969	C01152	[H][C@](N)(CC1=CN=CN1C)C(O)=O	Amino Acids	Histidine Metabolism	Sensitivity	Inverse variance weighted (multiplicative random effects)	2	1.05 (0.97-1.14)	0.215404	-	-	-	-	-	-	-	-	-	-	-	-	-	-	-
	3-ureidopropionate	3155	HMDB00026	111	C02642	NC(=O)NCCC(O)=O	Nucleotides	Pyrimidine Metabolism, Uracil containing	Primary	Inverse variance weighted (random effects)/ Wald ratio	-	-	-	-	-	-	-	-	5	0.94 (0.75-1.19)	0.624721	0.994872	-	-	-	-	-	-
	3-ureidopropionate	3155	HMDB00026	111	C02642	NC(=O)NCCC(O)=O	Nucleotides	Pyrimidine Metabolism, Uracil containing	Sensitivity	Inverse variance weighted (fixed effects)	-	-	-	-	-	-	-	-	5	0.94 (0.75-1.19)	0.624721	-	-	-	-	-	-	-
	3-ureidopropionate	3155	HMDB00026	111	C02642	NC(=O)NCCC(O)=O	Nucleotides	Pyrimidine Metabolism, Uracil containing	Sensitivity	Inverse variance weighted (multiplicative random effects)	-	-	-	-	-	-	-	-	5	0.94 (0.87-1.02)	0.137902	-	-	-	-	-	-	-
	3-ureidopropionate	3155	HMDB00026	111	C02642	NC(=O)NCCC(O)=O	Nucleotides	Pyrimidine Metabolism, Uracil containing	Sensitivity	MR Egger	-	-	-	-	-	-	-	-	5	0.87 (0.52-1.46)	0.639457	-	-	-	-	-	-	-
	3-ureidopropionate	3155	HMDB00026	111	C02642	NC(=O)NCCC(O)=O	Nucleotides	Pyrimidine Metabolism, Uracil containing	Sensitivity	Weighted median	-	-	-	-	-	-	-	-	5	0.97 (0.73-1.29)	0.842819	-	-	-	-	-	-	-
	3-ureidopropionate	3155	HMDB00026	111	C02642	NC(=O)NCCC(O)=O	Nucleotides	Pyrimidine Metabolism, Uracil containing	Sensitivity	Weighted mode	-	-	-	-	-	-	-	-	5	0.98 (0.71-1.36)	0.904938	-	-	-	-	-	-	-
	3b-hydroxy-5-cholenoic acid	43507	HMDB00308	92997	-	[H][C@@]12CC[C@H]([C@H](C)CCC(O)=O)[C@@]1(C)CC[C@@]1([H])[C@@]2([H])CC=C2C[C@@H](O)CC[C@]12C	Lipids	Secondary Bile Acid Metabolism	Primary	Inverse variance weighted (random effects)/ Wald ratio	-	-	-	-	-	-	-	-	3	0.88 (0.69-1.12)	0.298437	0.860923	-	-	-	-	-	-
	3b-hydroxy-5-cholenoic acid	43507	HMDB00308	92997	-	[H][C@@]12CC[C@H]([C@H](C)CCC(O)=O)[C@@]1(C)CC[C@@]1([H])[C@@]2([H])CC=C2C[C@@H](O)CC[C@]12C	Lipids	Secondary Bile Acid Metabolism	Sensitivity	Inverse variance weighted (fixed effects)	-	-	-	-	-	-	-	-	3	0.88 (0.72-1.07)	0.196457	-	-	-	-	-	-	-
	3b-hydroxy-5-cholenoic acid	43507	HMDB00308	92997	-	[H][C@@]12CC[C@H]([C@H](C)CCC(O)=O)[C@@]1(C)CC[C@@]1([H])[C@@]2([H])CC=C2C[C@@H](O)CC[C@]12C	Lipids	Secondary Bile Acid Metabolism	Sensitivity	Inverse variance weighted (multiplicative random effects)	-	-	-	-	-	-	-	-	3	0.88 (0.69-1.12)	0.298437	-	-	-	-	-	-	-
	3b-hydroxy-5-cholenoic acid	43507	HMDB00308	92997	-	[H][C@@]12CC[C@H]([C@H](C)CCC(O)=O)[C@@]1(C)CC[C@@]1([H])[C@@]2([H])CC=C2C[C@@H](O)CC[C@]12C	Lipids	Secondary Bile Acid Metabolism	Sensitivity	MR Egger	-	-	-	-	-	-	-	-	3	0.32 (0.03-2.95)	0.498721	-	-	-	-	-	-	-
	3b-hydroxy-5-cholenoic acid	43507	HMDB00308	92997	-	[H][C@@]12CC[C@H]([C@H](C)CCC(O)=O)[C@@]1(C)CC[C@@]1([H])[C@@]2([H])CC=C2C[C@@H](O)CC[C@]12C	Lipids	Secondary Bile Acid Metabolism	Sensitivity	Weighted median	-	-	-	-	-	-	-	-	3	0.79 (0.61-1.01)	0.0619362	-	-	-	-	-	-	-
	3b-hydroxy-5-cholenoic acid	43507	HMDB00308	92997	-	[H][C@@]12CC[C@H]([C@H](C)CCC(O)=O)[C@@]1(C)CC[C@@]1([H])[C@@]2([H])CC=C2C[C@@H](O)CC[C@]12C	Lipids	Secondary Bile Acid Metabolism	Sensitivity	Weighted mode	-	-	-	-	-	-	-	-	3	0.78 (0.56-1.08)	0.27569	-	-	-	-	-	-	-
	3beta-hydroxy-5-cholestenoate	54805	HMDB0012453	165511	C17333	[H][C@@]1(CC[C@@]2([H])[C@]3([H])CC=C4C[C@@H](O)CC[C@]4(C)[C@@]3([H])CC[C@]12C)[C@H](C)CCC[C@@H](C)C(O)=O	Lipids	Sterol	Primary	Inverse variance weighted (random effects)/ Wald ratio	-	-	-	-	-	-	-	-	20	0.86 (0.8-0.92)	3.48e-05	0.00101329	-	-	-	-	-	-
	3beta-hydroxy-5-cholestenoate	54805	HMDB0012453	165511	C17333	[H][C@@]1(CC[C@@]2([H])[C@]3([H])CC=C4C[C@@H](O)CC[C@]4(C)[C@@]3([H])CC[C@]12C)[C@H](C)CCC[C@@H](C)C(O)=O	Lipids	Sterol	Sensitivity	Inverse variance weighted (fixed effects)	-	-	-	-	-	-	-	-	20	0.86 (0.8-0.92)	3.48e-05	-	-	-	-	-	-	-
	3beta-hydroxy-5-cholestenoate	54805	HMDB0012453	165511	C17333	[H][C@@]1(CC[C@@]2([H])[C@]3([H])CC=C4C[C@@H](O)CC[C@]4(C)[C@@]3([H])CC[C@]12C)[C@H](C)CCC[C@@H](C)C(O)=O	Lipids	Sterol	Sensitivity	Inverse variance weighted (multiplicative random effects)	-	-	-	-	-	-	-	-	20	0.86 (0.81-0.92)	1.68e-05	-	-	-	-	-	-	-
	3beta-hydroxy-5-cholestenoate	54805	HMDB0012453	165511	C17333	[H][C@@]1(CC[C@@]2([H])[C@]3([H])CC=C4C[C@@H](O)CC[C@]4(C)[C@@]3([H])CC[C@]12C)[C@H](C)CCC[C@@H](C)C(O)=O	Lipids	Sterol	Sensitivity	MR Egger	-	-	-	-	-	-	-	-	20	0.87 (0.74-1.02)	0.107454	-	-	-	-	-	-	-
	3beta-hydroxy-5-cholestenoate	54805	HMDB0012453	165511	C17333	[H][C@@]1(CC[C@@]2([H])[C@]3([H])CC=C4C[C@@H](O)CC[C@]4(C)[C@@]3([H])CC[C@]12C)[C@H](C)CCC[C@@H](C)C(O)=O	Lipids	Sterol	Sensitivity	Weighted median	-	-	-	-	-	-	-	-	20	0.9 (0.8-1)	0.0481746	-	-	-	-	-	-	-
	3beta-hydroxy-5-cholestenoate	54805	HMDB0012453	165511	C17333	[H][C@@]1(CC[C@@]2([H])[C@]3([H])CC=C4C[C@@H](O)CC[C@]4(C)[C@@]3([H])CC[C@]12C)[C@H](C)CCC[C@@H](C)C(O)=O	Lipids	Sterol	Sensitivity	Weighted mode	-	-	-	-	-	-	-	-	20	0.9 (0.81-1)	0.069499	-	-	-	-	-	-	-
	4-acetamidobutanoate	1558	HMDB03681	18189	C02946	CC(=O)NCCCC(O)=O	Amino Acids	Polyamine Metabolism	Primary	Inverse variance weighted (random effects)/ Wald ratio	1	1.25 (1.07-1.46)	0.00529235	0.231099	1	1.04 (1-1.09)	0.0329516	0.219098	5	1.17 (1.03-1.34)	0.0176057	0.152891	3	1.07 (1.03-1.11)	0.000920781	0.0105606	71.3421	0.030518
	4-acetamidobutanoate	1558	HMDB03681	18189	C02946	CC(=O)NCCCC(O)=O	Amino Acids	Polyamine Metabolism	Sensitivity	Inverse variance weighted (fixed effects)	-	-	-	-	-	-	-	-	5	1.17 (1.04-1.33)	0.0105156	-	-	-	-	-	-	-
	4-acetamidobutanoate	1558	HMDB03681	18189	C02946	CC(=O)NCCCC(O)=O	Amino Acids	Polyamine Metabolism	Sensitivity	Inverse variance weighted (multiplicative random effects)	-	-	-	-	-	-	-	-	5	1.17 (1.03-1.34)	0.0176057	-	-	-	-	-	-	-
	4-acetamidobutanoate	1558	HMDB03681	18189	C02946	CC(=O)NCCCC(O)=O	Amino Acids	Polyamine Metabolism	Sensitivity	MR Egger	-	-	-	-	-	-	-	-	5	1.17 (0.82-1.67)	0.440487	-	-	-	-	-	-	-
	4-acetamidobutanoate	1558	HMDB03681	18189	C02946	CC(=O)NCCCC(O)=O	Amino Acids	Polyamine Metabolism	Sensitivity	Weighted median	-	-	-	-	-	-	-	-	5	1.1 (0.95-1.27)	0.201533	-	-	-	-	-	-	-
	4-acetamidobutanoate	1558	HMDB03681	18189	C02946	CC(=O)NCCCC(O)=O	Amino Acids	Polyamine Metabolism	Sensitivity	Weighted mode	-	-	-	-	-	-	-	-	5	1.09 (0.93-1.27)	0.33974	-	-	-	-	-	-	-
	4-androsten-3beta,17beta-diol disulfate 1*	37202	HMDB03818	10634	C04295	[H][C@@]12CC[C@H](O)[C@@]1(C)CC[C@@]1([H])[C@@]2([H])CC=C2C[C@@H](O)CC[C@]12C	Lipids	Androgenic Steroids	Primary	Inverse variance weighted (random effects)/ Wald ratio	-	-	-	-	1	1.04 (1.01-1.08)	0.0230848	0.219098	-	-	-	-	-	-	-	-	-	-
	4-guanidinobutanoate	15681	HMDB03464	500	C01035	NC(=N)NCCCC(O)=O	Amino Acids	Guanidino and Acetamido Metabolism	Primary	Inverse variance weighted (random effects)/ Wald ratio	-	-	-	-	1	1 (0.95-1.06)	0.97201	0.974675	6	1.01 (0.9-1.13)	0.839665	0.997496	2	1 (0.95-1.05)	0.903744	0.939606	0	0.868197
	4-guanidinobutanoate	15681	HMDB03464	500	C01035	NC(=N)NCCCC(O)=O	Amino Acids	Guanidino and Acetamido Metabolism	Sensitivity	Inverse variance weighted (fixed effects)	-	-	-	-	-	-	-	-	6	1.01 (0.91-1.13)	0.829277	-	-	-	-	-	-	-
	4-guanidinobutanoate	15681	HMDB03464	500	C01035	NC(=N)NCCCC(O)=O	Amino Acids	Guanidino and Acetamido Metabolism	Sensitivity	Inverse variance weighted (multiplicative random effects)	-	-	-	-	-	-	-	-	6	1.01 (0.9-1.13)	0.839665	-	-	-	-	-	-	-
	4-guanidinobutanoate	15681	HMDB03464	500	C01035	NC(=N)NCCCC(O)=O	Amino Acids	Guanidino and Acetamido Metabolism	Sensitivity	MR Egger	-	-	-	-	-	-	-	-	6	1.31 (1-1.71)	0.123828	-	-	-	-	-	-	-
	4-guanidinobutanoate	15681	HMDB03464	500	C01035	NC(=N)NCCCC(O)=O	Amino Acids	Guanidino and Acetamido Metabolism	Sensitivity	Weighted median	-	-	-	-	-	-	-	-	6	1.08 (0.95-1.21)	0.230722	-	-	-	-	-	-	-
	4-guanidinobutanoate	15681	HMDB03464	500	C01035	NC(=N)NCCCC(O)=O	Amino Acids	Guanidino and Acetamido Metabolism	Sensitivity	Weighted mode	-	-	-	-	-	-	-	-	6	1.06 (0.94-1.21)	0.388769	-	-	-	-	-	-	-
	4-hydroxybenzoate	21133	HMDB00500	135	C00156	OC(=O)C1=CC=C(O)C=C1	Xenobiotics	Benzoate Metabolism	Primary	Inverse variance weighted (random effects)/ Wald ratio	-	-	-	-	-	-	-	-	2	0.87 (0.57-1.32)	0.507724	0.994872	-	-	-	-	-	-
	4-hydroxybenzoate	21133	HMDB00500	135	C00156	OC(=O)C1=CC=C(O)C=C1	Xenobiotics	Benzoate Metabolism	Sensitivity	Inverse variance weighted (fixed effects)	-	-	-	-	-	-	-	-	2	0.87 (0.57-1.32)	0.507724	-	-	-	-	-	-	-
	4-hydroxybenzoate	21133	HMDB00500	135	C00156	OC(=O)C1=CC=C(O)C=C1	Xenobiotics	Benzoate Metabolism	Sensitivity	Inverse variance weighted (multiplicative random effects)	-	-	-	-	-	-	-	-	2	0.87 (0.66-1.15)	0.318268	-	-	-	-	-	-	-
	4-hydroxychlorothalonil	48441	-	34217	-	-	Xenobiotics	Chemical	Primary	Inverse variance weighted (random effects)/ Wald ratio	-	-	-	-	-	-	-	-	13	0.92 (0.86-0.98)	0.00972664	0.111969	-	-	-	-	-	-
	4-hydroxychlorothalonil	48441	-	34217	-	-	Xenobiotics	Chemical	Sensitivity	Inverse variance weighted (fixed effects)	-	-	-	-	-	-	-	-	13	0.92 (0.86-0.98)	0.00972664	-	-	-	-	-	-	-
	4-hydroxychlorothalonil	48441	-	34217	-	-	Xenobiotics	Chemical	Sensitivity	Inverse variance weighted (multiplicative random effects)	-	-	-	-	-	-	-	-	13	0.92 (0.87-0.96)	0.000681561	-	-	-	-	-	-	-
	4-hydroxychlorothalonil	48441	-	34217	-	-	Xenobiotics	Chemical	Sensitivity	MR Egger	-	-	-	-	-	-	-	-	13	0.95 (0.83-1.09)	0.476522	-	-	-	-	-	-	-
	4-hydroxychlorothalonil	48441	-	34217	-	-	Xenobiotics	Chemical	Sensitivity	Weighted median	-	-	-	-	-	-	-	-	13	0.93 (0.86-1.01)	0.0935116	-	-	-	-	-	-	-
	4-hydroxychlorothalonil	48441	-	34217	-	-	Xenobiotics	Chemical	Sensitivity	Weighted mode	-	-	-	-	-	-	-	-	13	0.93 (0.85-1.02)	0.133272	-	-	-	-	-	-	-
	4-hydroxyphenylpyruvate	1669	HMDB00707	979	C01179	OC(=O)C(=O)CC1=CC=C(O)C=C1	Amino Acids	Tyrosine Metabolism	Primary	Inverse variance weighted (random effects)/ Wald ratio	-	-	-	-	-	-	-	-	2	1.12 (0.92-1.36)	0.251735	0.803929	-	-	-	-	-	-
	4-hydroxyphenylpyruvate	1669	HMDB00707	979	C01179	OC(=O)C(=O)CC1=CC=C(O)C=C1	Amino Acids	Tyrosine Metabolism	Sensitivity	Inverse variance weighted (fixed effects)	-	-	-	-	-	-	-	-	2	1.12 (0.92-1.36)	0.251735	-	-	-	-	-	-	-
	4-hydroxyphenylpyruvate	1669	HMDB00707	979	C01179	OC(=O)C(=O)CC1=CC=C(O)C=C1	Amino Acids	Tyrosine Metabolism	Sensitivity	Inverse variance weighted (multiplicative random effects)	-	-	-	-	-	-	-	-	2	1.12 (1.06-1.18)	4.24672e-05	-	-	-	-	-	-	-
	4-methyl-2-oxopentanoate	22116	HMDB00695	70	C00233	CC(C)CC(=O)C(O)=O	Amino Acids	Leucine, Isoleucine and Valine Metabolism	Primary	Inverse variance weighted (random effects)/ Wald ratio	-	-	-	-	-	-	-	-	2	0.7 (0.45-1.09)	0.117335	0.537787	-	-	-	-	-	-
	4-methyl-2-oxopentanoate	22116	HMDB00695	70	C00233	CC(C)CC(=O)C(O)=O	Amino Acids	Leucine, Isoleucine and Valine Metabolism	Sensitivity	Inverse variance weighted (fixed effects)	-	-	-	-	-	-	-	-	2	0.7 (0.52-0.93)	0.0149051	-	-	-	-	-	-	-
	4-methyl-2-oxopentanoate	22116	HMDB00695	70	C00233	CC(C)CC(=O)C(O)=O	Amino Acids	Leucine, Isoleucine and Valine Metabolism	Sensitivity	Inverse variance weighted (multiplicative random effects)	-	-	-	-	-	-	-	-	2	0.7 (0.45-1.09)	0.117335	-	-	-	-	-	-	-
	4-vinylphenol sulfate	36098	HMDB04072	6426766	C05627	OS(=O)(=O)OC1=CC=C(C=C)C=C1	Xenobiotics	Benzoate Metabolism	Primary	Inverse variance weighted (random effects)/ Wald ratio	1	0.87 (0.74-1.01)	0.0617563	0.809008	1	0.99 (0.94-1.04)	0.712566	0.89919	-	-	-	-	2	0.98 (0.93-1.02)	0.358087	0.732959	64.0363	0.0954135
	5,6-dihydrothymine	1418	HMDB00079	93556	C00906	CC1CNC(=O)NC1=O	Nucleotides	Pyrimidine Metabolism, Thymine containing	Primary	Inverse variance weighted (random effects)/ Wald ratio	-	-	-	-	-	-	-	-	1	0.9 (0.58-1.41)	0.656616	0.994872	-	-	-	-	-	-
	5-HETE	37372	HMDB0011134	5280733	C04805	CCCCC\C=C/C\C=C/C\C=C/C=C/[C@@H](O)CCCC(O)=O	Lipids	Fatty Acid, Monohydroxy	Primary	Inverse variance weighted (random effects)/ Wald ratio	1	1 (0.85-1.17)	0.998227	1	2	1 (0.92-1.09)	0.959942	0.974675	-	-	-	-	2	1 (0.93-1.08)	0.964042	0.964987	0	0.982247
	5-HETE	37372	HMDB0011134	5280733	C04805	CCCCC\C=C/C\C=C/C\C=C/C=C/[C@@H](O)CCCC(O)=O	Lipids	Fatty Acid, Monohydroxy	Sensitivity	Inverse variance weighted (fixed effects)	-	-	-	-	2	1 (0.98-1.03)	0.852378	-	-	-	-	-	-	-	-	-	-	-
	5-HETE	37372	HMDB0011134	5280733	C04805	CCCCC\C=C/C\C=C/C\C=C/C=C/[C@@H](O)CCCC(O)=O	Lipids	Fatty Acid, Monohydroxy	Sensitivity	Inverse variance weighted (multiplicative random effects)	-	-	-	-	2	1 (0.92-1.09)	0.959942	-	-	-	-	-	-	-	-	-	-	-
	5-acetylamino-6-amino-3-methyluracil	34424	HMDB04400	88299	C16366	CN1C(=O)NC(N)=C(NC(C)=O)C1=O	Xenobiotics	Xanthine Metabolism	Primary	Inverse variance weighted (random effects)/ Wald ratio	-	-	-	-	1	1.04 (1-1.09)	0.0330714	0.219098	1	1.11 (0.9-1.36)	0.320574	0.89235	2	1.05 (1.01-1.09)	0.0224579	0.127912	0	0.572496
	5-acetylamino-6-formylamino-3-methyluracil	34401	HMDB11105	108214	C16365	CN1C(=O)NC(NC=O)=C(NC(C)=O)C1=O	Xenobiotics	Xanthine Metabolism	Primary	Inverse variance weighted (random effects)/ Wald ratio	-	-	-	-	-	-	-	-	8	1.09 (1.02-1.16)	0.0143737	0.147151	-	-	-	-	-	-
	5-acetylamino-6-formylamino-3-methyluracil	34401	HMDB11105	108214	C16365	CN1C(=O)NC(NC=O)=C(NC(C)=O)C1=O	Xenobiotics	Xanthine Metabolism	Sensitivity	Inverse variance weighted (fixed effects)	-	-	-	-	-	-	-	-	8	1.09 (1.02-1.16)	0.0110802	-	-	-	-	-	-	-
	5-acetylamino-6-formylamino-3-methyluracil	34401	HMDB11105	108214	C16365	CN1C(=O)NC(NC=O)=C(NC(C)=O)C1=O	Xenobiotics	Xanthine Metabolism	Sensitivity	Inverse variance weighted (multiplicative random effects)	-	-	-	-	-	-	-	-	8	1.09 (1.02-1.16)	0.0143737	-	-	-	-	-	-	-
	5-acetylamino-6-formylamino-3-methyluracil	34401	HMDB11105	108214	C16365	CN1C(=O)NC(NC=O)=C(NC(C)=O)C1=O	Xenobiotics	Xanthine Metabolism	Sensitivity	MR Egger	-	-	-	-	-	-	-	-	8	1.12 (0.95-1.33)	0.238262	-	-	-	-	-	-	-
	5-acetylamino-6-formylamino-3-methyluracil	34401	HMDB11105	108214	C16365	CN1C(=O)NC(NC=O)=C(NC(C)=O)C1=O	Xenobiotics	Xanthine Metabolism	Sensitivity	Weighted median	-	-	-	-	-	-	-	-	8	1.06 (0.98-1.15)	0.153978	-	-	-	-	-	-	-
	5-acetylamino-6-formylamino-3-methyluracil	34401	HMDB11105	108214	C16365	CN1C(=O)NC(NC=O)=C(NC(C)=O)C1=O	Xenobiotics	Xanthine Metabolism	Sensitivity	Weighted mode	-	-	-	-	-	-	-	-	8	1.06 (0.97-1.16)	0.218727	-	-	-	-	-	-	-
	5-bromotryptophan	-	-	96735	-	-	Amino Acids	Tryptophan Metabolism	Primary	Inverse variance weighted (random effects)/ Wald ratio	-	-	-	-	-	-	-	-	4	0.95 (0.78-1.16)	0.588934	0.994872	-	-	-	-	-	-
	5-bromotryptophan	-	-	96735	-	-	Amino Acids	Tryptophan Metabolism	Sensitivity	Inverse variance weighted (fixed effects)	-	-	-	-	-	-	-	-	4	0.95 (0.78-1.16)	0.588934	-	-	-	-	-	-	-
	5-bromotryptophan	-	-	96735	-	-	Amino Acids	Tryptophan Metabolism	Sensitivity	Inverse variance weighted (multiplicative random effects)	-	-	-	-	-	-	-	-	4	0.95 (0.84-1.06)	0.358192	-	-	-	-	-	-	-
	5-bromotryptophan	-	-	96735	-	-	Amino Acids	Tryptophan Metabolism	Sensitivity	MR Egger	-	-	-	-	-	-	-	-	4	1.11 (0.75-1.62)	0.653967	-	-	-	-	-	-	-
	5-bromotryptophan	-	-	96735	-	-	Amino Acids	Tryptophan Metabolism	Sensitivity	Weighted median	-	-	-	-	-	-	-	-	4	0.93 (0.73-1.17)	0.511564	-	-	-	-	-	-	-
	5-bromotryptophan	-	-	96735	-	-	Amino Acids	Tryptophan Metabolism	Sensitivity	Weighted mode	-	-	-	-	-	-	-	-	4	0.92 (0.7-1.23)	0.617554	-	-	-	-	-	-	-
	5-dodecenoate (12:1n7)	33968	HMDB00529	5312378	-	CCCCCC\C=C/CCCC(O)=O	Lipids	Medium Chain Fatty Acid	Primary	Inverse variance weighted (random effects)/ Wald ratio	1	1.06 (0.92-1.22)	0.441099	0.863252	-	-	-	-	1	0.83 (0.57-1.21)	0.334819	0.895867	2	1.03 (0.9-1.17)	0.703562	0.886217	27.4702	0.240315
	5-hydroxyindoleacetate	-	HMDB0000763	1826	C05635	OC(=O)CC1=CNC2=C1C=C(O)C=C2	Amino Acids	Tryptophan Metabolism	Primary	Inverse variance weighted (random effects)/ Wald ratio	-	-	-	-	-	-	-	-	1	0.95 (0.67-1.34)	0.766462	0.994872	-	-	-	-	-	-
	5-hydroxylysine	15685	HMDB00450	1029	C16741	NC[C@H](O)CC[C@H](N)C(O)=O	Amino Acids	Lysine Metabolism	Primary	Inverse variance weighted (random effects)/ Wald ratio	-	-	-	-	-	-	-	-	60	1.01 (0.96-1.06)	0.701919	0.994872	-	-	-	-	-	-
	5-hydroxylysine	15685	HMDB00450	1029	C16741	NC[C@H](O)CC[C@H](N)C(O)=O	Amino Acids	Lysine Metabolism	Sensitivity	Inverse variance weighted (fixed effects)	-	-	-	-	-	-	-	-	60	1.01 (0.96-1.06)	0.701919	-	-	-	-	-	-	-
	5-hydroxylysine	15685	HMDB00450	1029	C16741	NC[C@H](O)CC[C@H](N)C(O)=O	Amino Acids	Lysine Metabolism	Sensitivity	Inverse variance weighted (multiplicative random effects)	-	-	-	-	-	-	-	-	60	1.01 (0.98-1.04)	0.594879	-	-	-	-	-	-	-
	5-hydroxylysine	15685	HMDB00450	1029	C16741	NC[C@H](O)CC[C@H](N)C(O)=O	Amino Acids	Lysine Metabolism	Sensitivity	MR Egger	-	-	-	-	-	-	-	-	60	1.01 (0.89-1.15)	0.844744	-	-	-	-	-	-	-
	5-hydroxylysine	15685	HMDB00450	1029	C16741	NC[C@H](O)CC[C@H](N)C(O)=O	Amino Acids	Lysine Metabolism	Sensitivity	Weighted median	-	-	-	-	-	-	-	-	60	1.03 (0.96-1.11)	0.387415	-	-	-	-	-	-	-
	5-hydroxylysine	15685	HMDB00450	1029	C16741	NC[C@H](O)CC[C@H](N)C(O)=O	Amino Acids	Lysine Metabolism	Sensitivity	Weighted mode	-	-	-	-	-	-	-	-	60	1.04 (0.93-1.16)	0.488855	-	-	-	-	-	-	-
	5-methylthioadenosine (MTA)	1419	HMDB01173	439176	C00170	CSC[C@H]1O[C@H]([C@H](O)[C@@H]1O)N1C=NC2=C1N=CN=C2N	Amino Acids	Polyamine Metabolism	Primary	Inverse variance weighted (random effects)/ Wald ratio	-	-	-	-	-	-	-	-	1	0.92 (0.6-1.43)	0.717538	0.994872	-	-	-	-	-	-
	5-methyluridine (ribothymidine)	35136	HMDB00884	445408	-	CC1=CN([C@@H]2O[C@H](CO)[C@@H](O)[C@H]2O)C(=O)NC1=O	Nucleotides	Pyrimidine Metabolism, Uracil containing	Primary	Inverse variance weighted (random effects)/ Wald ratio	-	-	-	-	2	1.04 (1.02-1.06)	0.000293094	0.010356	7	1.07 (0.94-1.22)	0.315178	0.888518	2	1.04 (1.02-1.07)	0.000185028	0.00302983	0	0.703337
	5-methyluridine (ribothymidine)	35136	HMDB00884	445408	-	CC1=CN([C@@H]2O[C@H](CO)[C@@H](O)[C@H]2O)C(=O)NC1=O	Nucleotides	Pyrimidine Metabolism, Uracil containing	Sensitivity	Inverse variance weighted (fixed effects)	-	-	-	-	2	1.04 (1.02-1.06)	0.000293094	-	7	1.07 (0.96-1.19)	0.216723	-	-	-	-	-	-	-
	5-methyluridine (ribothymidine)	35136	HMDB00884	445408	-	CC1=CN([C@@H]2O[C@H](CO)[C@@H](O)[C@H]2O)C(=O)NC1=O	Nucleotides	Pyrimidine Metabolism, Uracil containing	Sensitivity	Inverse variance weighted (multiplicative random effects)	-	-	-	-	2	1.04 (1.03-1.06)	2.03539e-08	-	7	1.07 (0.94-1.22)	0.315178	-	-	-	-	-	-	-
	5-methyluridine (ribothymidine)	35136	HMDB00884	445408	-	CC1=CN([C@@H]2O[C@H](CO)[C@@H](O)[C@H]2O)C(=O)NC1=O	Nucleotides	Pyrimidine Metabolism, Uracil containing	Sensitivity	MR Egger	-	-	-	-	-	-	-	-	7	0.97 (0.78-1.19)	0.756552	-	-	-	-	-	-	-
	5-methyluridine (ribothymidine)	35136	HMDB00884	445408	-	CC1=CN([C@@H]2O[C@H](CO)[C@@H](O)[C@H]2O)C(=O)NC1=O	Nucleotides	Pyrimidine Metabolism, Uracil containing	Sensitivity	Weighted median	-	-	-	-	-	-	-	-	7	1.05 (0.93-1.18)	0.458847	-	-	-	-	-	-	-
	5-methyluridine (ribothymidine)	35136	HMDB00884	445408	-	CC1=CN([C@@H]2O[C@H](CO)[C@@H](O)[C@H]2O)C(=O)NC1=O	Nucleotides	Pyrimidine Metabolism, Uracil containing	Sensitivity	Weighted mode	-	-	-	-	-	-	-	-	7	1.04 (0.92-1.18)	0.550994	-	-	-	-	-	-	-
	5-oxoproline	1494	HMDB00267	7405	C01879	OC(=O)[C@@H]1CCC(=O)N1	Amino Acids	Glutathione Metabolism	Primary	Inverse variance weighted (random effects)/ Wald ratio	1	0.98 (0.87-1.1)	0.73913	0.880237	-	-	-	-	36	0.87 (0.81-0.94)	0.000177946	0.00419444	2	0.9 (0.85-0.96)	0.000758793	0.00994019	64.5601	0.092999
	5-oxoproline	1494	HMDB00267	7405	C01879	OC(=O)[C@@H]1CCC(=O)N1	Amino Acids	Glutathione Metabolism	Sensitivity	Inverse variance weighted (fixed effects)	-	-	-	-	-	-	-	-	36	0.87 (0.81-0.94)	0.000177946	-	-	-	-	-	-	-
	5-oxoproline	1494	HMDB00267	7405	C01879	OC(=O)[C@@H]1CCC(=O)N1	Amino Acids	Glutathione Metabolism	Sensitivity	Inverse variance weighted (multiplicative random effects)	-	-	-	-	-	-	-	-	36	0.87 (0.81-0.93)	0.000132675	-	-	-	-	-	-	-
	5-oxoproline	1494	HMDB00267	7405	C01879	OC(=O)[C@@H]1CCC(=O)N1	Amino Acids	Glutathione Metabolism	Sensitivity	MR Egger	-	-	-	-	-	-	-	-	36	0.86 (0.74-0.99)	0.0505553	-	-	-	-	-	-	-
	5-oxoproline	1494	HMDB00267	7405	C01879	OC(=O)[C@@H]1CCC(=O)N1	Amino Acids	Glutathione Metabolism	Sensitivity	Weighted median	-	-	-	-	-	-	-	-	36	0.92 (0.82-1.03)	0.143932	-	-	-	-	-	-	-
	5-oxoproline	1494	HMDB00267	7405	C01879	OC(=O)[C@@H]1CCC(=O)N1	Amino Acids	Glutathione Metabolism	Sensitivity	Weighted mode	-	-	-	-	-	-	-	-	36	0.93 (0.82-1.05)	0.234913	-	-	-	-	-	-	-
	5alpha-androstan-3alpha,17alpha-diol monosulfate (1)	-	-	-	-	-	Lipids	Androgenic Steroids	Primary	Inverse variance weighted (random effects)/ Wald ratio	-	-	-	-	-	-	-	-	6	1.04 (0.91-1.2)	0.523443	0.994872	-	-	-	-	-	-
	5alpha-androstan-3alpha,17alpha-diol monosulfate (1)	-	-	-	-	-	Lipids	Androgenic Steroids	Sensitivity	Inverse variance weighted (fixed effects)	-	-	-	-	-	-	-	-	6	1.04 (0.92-1.18)	0.492112	-	-	-	-	-	-	-
	5alpha-androstan-3alpha,17alpha-diol monosulfate (1)	-	-	-	-	-	Lipids	Androgenic Steroids	Sensitivity	Inverse variance weighted (multiplicative random effects)	-	-	-	-	-	-	-	-	6	1.04 (0.91-1.2)	0.523443	-	-	-	-	-	-	-
	5alpha-androstan-3alpha,17alpha-diol monosulfate (1)	-	-	-	-	-	Lipids	Androgenic Steroids	Sensitivity	MR Egger	-	-	-	-	-	-	-	-	6	1 (0.6-1.65)	0.994798	-	-	-	-	-	-	-
	5alpha-androstan-3alpha,17alpha-diol monosulfate (1)	-	-	-	-	-	Lipids	Androgenic Steroids	Sensitivity	Weighted median	-	-	-	-	-	-	-	-	6	1.06 (0.91-1.24)	0.448981	-	-	-	-	-	-	-
	5alpha-androstan-3alpha,17alpha-diol monosulfate (1)	-	-	-	-	-	Lipids	Androgenic Steroids	Sensitivity	Weighted mode	-	-	-	-	-	-	-	-	6	1.06 (0.89-1.26)	0.535302	-	-	-	-	-	-	-
	5alpha-androstan-3alpha,17beta-diol 17-glucuronide	47132	-	-	-	-	Lipids	Androgenic Steroids	Primary	Inverse variance weighted (random effects)/ Wald ratio	-	-	-	-	-	-	-	-	2	0.93 (0.78-1.11)	0.422634	0.987241	-	-	-	-	-	-
	5alpha-androstan-3alpha,17beta-diol 17-glucuronide	47132	-	-	-	-	Lipids	Androgenic Steroids	Sensitivity	Inverse variance weighted (fixed effects)	-	-	-	-	-	-	-	-	2	0.93 (0.78-1.11)	0.422634	-	-	-	-	-	-	-
	5alpha-androstan-3alpha,17beta-diol 17-glucuronide	47132	-	-	-	-	Lipids	Androgenic Steroids	Sensitivity	Inverse variance weighted (multiplicative random effects)	-	-	-	-	-	-	-	-	2	0.93 (0.9-0.96)	2.93e-07	-	-	-	-	-	-	-
	5alpha-androstan-3alpha,17beta-diol disulfate	37184	HMDB0094682	56639109	-	[H][C@@]12CC[C@H](OS(O)(=O)=O)[C@@]1(C)CC[C@@]1([H])[C@@]2([H])CC[C@@]2([H])C[C@@H](CC[C@]12C)OS(O)(=O)=O	Lipids	Androgenic Steroids	Primary	Inverse variance weighted (random effects)/ Wald ratio	-	-	-	-	-	-	-	-	2	0.93 (0.78-1.11)	0.422634	0.987241	-	-	-	-	-	-
	5alpha-androstan-3alpha,17beta-diol disulfate	37184	HMDB0094682	56639109	-	[H][C@@]12CC[C@H](OS(O)(=O)=O)[C@@]1(C)CC[C@@]1([H])[C@@]2([H])CC[C@@]2([H])C[C@@H](CC[C@]12C)OS(O)(=O)=O	Lipids	Androgenic Steroids	Sensitivity	Inverse variance weighted (fixed effects)	-	-	-	-	-	-	-	-	2	0.93 (0.78-1.11)	0.422634	-	-	-	-	-	-	-
	5alpha-androstan-3alpha,17beta-diol disulfate	37184	HMDB0094682	56639109	-	[H][C@@]12CC[C@H](OS(O)(=O)=O)[C@@]1(C)CC[C@@]1([H])[C@@]2([H])CC[C@@]2([H])C[C@@H](CC[C@]12C)OS(O)(=O)=O	Lipids	Androgenic Steroids	Sensitivity	Inverse variance weighted (multiplicative random effects)	-	-	-	-	-	-	-	-	2	0.93 (0.9-0.96)	2.93e-07	-	-	-	-	-	-	-
	5alpha-androstan-3alpha,17beta-diol monosulfate (1)	37186	-	-	-	-	Lipids	Androgenic Steroids	Primary	Inverse variance weighted (random effects)/ Wald ratio	-	-	-	-	-	-	-	-	4	1.02 (0.88-1.18)	0.802139	0.994872	-	-	-	-	-	-
	5alpha-androstan-3alpha,17beta-diol monosulfate (1)	37186	-	-	-	-	Lipids	Androgenic Steroids	Sensitivity	Inverse variance weighted (fixed effects)	-	-	-	-	-	-	-	-	4	1.02 (0.88-1.18)	0.802139	-	-	-	-	-	-	-
	5alpha-androstan-3alpha,17beta-diol monosulfate (1)	37186	-	-	-	-	Lipids	Androgenic Steroids	Sensitivity	Inverse variance weighted (multiplicative random effects)	-	-	-	-	-	-	-	-	4	1.02 (0.93-1.12)	0.684502	-	-	-	-	-	-	-
	5alpha-androstan-3alpha,17beta-diol monosulfate (1)	37186	-	-	-	-	Lipids	Androgenic Steroids	Sensitivity	MR Egger	-	-	-	-	-	-	-	-	4	1 (0.81-1.23)	0.980852	-	-	-	-	-	-	-
	5alpha-androstan-3alpha,17beta-diol monosulfate (1)	37186	-	-	-	-	Lipids	Androgenic Steroids	Sensitivity	Weighted median	-	-	-	-	-	-	-	-	4	1.01 (0.86-1.18)	0.947197	-	-	-	-	-	-	-
	5alpha-androstan-3alpha,17beta-diol monosulfate (1)	37186	-	-	-	-	Lipids	Androgenic Steroids	Sensitivity	Weighted mode	-	-	-	-	-	-	-	-	4	1 (0.83-1.21)	0.999284	-	-	-	-	-	-	-
	5alpha-androstan-3alpha,17beta-diol monosulfate (2)	37185	-	-	-	-	Lipids	Androgenic Steroids	Primary	Inverse variance weighted (random effects)/ Wald ratio	-	-	-	-	-	-	-	-	5	1.02 (0.89-1.18)	0.732655	0.994872	-	-	-	-	-	-
	5alpha-androstan-3alpha,17beta-diol monosulfate (2)	37185	-	-	-	-	Lipids	Androgenic Steroids	Sensitivity	Inverse variance weighted (fixed effects)	-	-	-	-	-	-	-	-	5	1.02 (0.89-1.18)	0.732655	-	-	-	-	-	-	-
	5alpha-androstan-3alpha,17beta-diol monosulfate (2)	37185	-	-	-	-	Lipids	Androgenic Steroids	Sensitivity	Inverse variance weighted (multiplicative random effects)	-	-	-	-	-	-	-	-	5	1.02 (0.91-1.15)	0.683706	-	-	-	-	-	-	-
	5alpha-androstan-3alpha,17beta-diol monosulfate (2)	37185	-	-	-	-	Lipids	Androgenic Steroids	Sensitivity	MR Egger	-	-	-	-	-	-	-	-	5	0.78 (0.24-2.54)	0.711639	-	-	-	-	-	-	-
	5alpha-androstan-3alpha,17beta-diol monosulfate (2)	37185	-	-	-	-	Lipids	Androgenic Steroids	Sensitivity	Weighted median	-	-	-	-	-	-	-	-	5	1.06 (0.89-1.25)	0.526198	-	-	-	-	-	-	-
	5alpha-androstan-3alpha,17beta-diol monosulfate (2)	37185	-	-	-	-	Lipids	Androgenic Steroids	Sensitivity	Weighted mode	-	-	-	-	-	-	-	-	5	1.13 (0.86-1.48)	0.425824	-	-	-	-	-	-	-
	5alpha-androstan-3beta,17alpha-diol disulfate	37187	-	-	-	-	Lipids	Androgenic Steroids	Primary	Inverse variance weighted (random effects)/ Wald ratio	-	-	-	-	-	-	-	-	2	1.02 (0.81-1.28)	0.865955	0.997496	-	-	-	-	-	-
	5alpha-androstan-3beta,17alpha-diol disulfate	37187	-	-	-	-	Lipids	Androgenic Steroids	Sensitivity	Inverse variance weighted (fixed effects)	-	-	-	-	-	-	-	-	2	1.02 (0.81-1.28)	0.865955	-	-	-	-	-	-	-
	5alpha-androstan-3beta,17alpha-diol disulfate	37187	-	-	-	-	Lipids	Androgenic Steroids	Sensitivity	Inverse variance weighted (multiplicative random effects)	-	-	-	-	-	-	-	-	2	1.02 (0.94-1.1)	0.624752	-	-	-	-	-	-	-
	5alpha-androstan-3beta,17beta-diol disulfate	37190	HMDB00493	242332	C12525	[H][C@@]12CC[C@H](O)[C@@]1(C)CC[C@@]1([H])[C@@]2([H])CC[C@@]2([H])C[C@@H](O)CC[C@]12C	Lipids	Androgenic Steroids	Primary	Inverse variance weighted (random effects)/ Wald ratio	2	1.07 (0.86-1.33)	0.544872	0.863348	1	1.01 (0.98-1.05)	0.428492	0.783106	2	0.96 (0.8-1.17)	0.713178	0.994872	3	1.01 (0.98-1.05)	0.424936	0.784036	0	0.781942
	5alpha-androstan-3beta,17beta-diol disulfate	37190	HMDB00493	242332	C12525	[H][C@@]12CC[C@H](O)[C@@]1(C)CC[C@@]1([H])[C@@]2([H])CC[C@@]2([H])C[C@@H](O)CC[C@]12C	Lipids	Androgenic Steroids	Sensitivity	Inverse variance weighted (fixed effects)	2	1.07 (0.94-1.22)	0.316545	-	-	-	-	-	2	0.96 (0.8-1.17)	0.713178	-	-	-	-	-	-	-
	5alpha-androstan-3beta,17beta-diol disulfate	37190	HMDB00493	242332	C12525	[H][C@@]12CC[C@H](O)[C@@]1(C)CC[C@@]1([H])[C@@]2([H])CC[C@@]2([H])C[C@@H](O)CC[C@]12C	Lipids	Androgenic Steroids	Sensitivity	Inverse variance weighted (multiplicative random effects)	2	1.07 (0.86-1.33)	0.544872	-	-	-	-	-	2	0.96 (0.82-1.13)	0.661801	-	-	-	-	-	-	-
	5alpha-androstan-3beta,17beta-diol monosulfate (1)	-	-	-	-	-	Lipids	Androgenic Steroids	Primary	Inverse variance weighted (random effects)/ Wald ratio	-	-	-	-	-	-	-	-	2	0.86 (0.64-1.15)	0.29827	0.860923	-	-	-	-	-	-
	5alpha-androstan-3beta,17beta-diol monosulfate (1)	-	-	-	-	-	Lipids	Androgenic Steroids	Sensitivity	Inverse variance weighted (fixed effects)	-	-	-	-	-	-	-	-	2	0.86 (0.64-1.15)	0.29827	-	-	-	-	-	-	-
	5alpha-androstan-3beta,17beta-diol monosulfate (1)	-	-	-	-	-	Lipids	Androgenic Steroids	Sensitivity	Inverse variance weighted (multiplicative random effects)	-	-	-	-	-	-	-	-	2	0.86 (0.71-1.04)	0.111219	-	-	-	-	-	-	-
	5alpha-androstan-3beta,17beta-diol monosulfate (2)	37192	-	-	-	-	Lipids	Androgenic Steroids	Primary	Inverse variance weighted (random effects)/ Wald ratio	-	-	-	-	-	-	-	-	4	1.02 (0.88-1.18)	0.802139	0.994872	-	-	-	-	-	-
	5alpha-androstan-3beta,17beta-diol monosulfate (2)	37192	-	-	-	-	Lipids	Androgenic Steroids	Sensitivity	Inverse variance weighted (fixed effects)	-	-	-	-	-	-	-	-	4	1.02 (0.88-1.18)	0.802139	-	-	-	-	-	-	-
	5alpha-androstan-3beta,17beta-diol monosulfate (2)	37192	-	-	-	-	Lipids	Androgenic Steroids	Sensitivity	Inverse variance weighted (multiplicative random effects)	-	-	-	-	-	-	-	-	4	1.02 (0.93-1.12)	0.684502	-	-	-	-	-	-	-
	5alpha-androstan-3beta,17beta-diol monosulfate (2)	37192	-	-	-	-	Lipids	Androgenic Steroids	Sensitivity	MR Egger	-	-	-	-	-	-	-	-	4	1 (0.81-1.23)	0.980852	-	-	-	-	-	-	-
	5alpha-androstan-3beta,17beta-diol monosulfate (2)	37192	-	-	-	-	Lipids	Androgenic Steroids	Sensitivity	Weighted median	-	-	-	-	-	-	-	-	4	1.01 (0.86-1.17)	0.945031	-	-	-	-	-	-	-
	5alpha-androstan-3beta,17beta-diol monosulfate (2)	37192	-	-	-	-	Lipids	Androgenic Steroids	Sensitivity	Weighted mode	-	-	-	-	-	-	-	-	4	1 (0.84-1.19)	0.999215	-	-	-	-	-	-	-
	5alpha-pregnan-3-alpha or beta,20alpha-diol disulfate	-	-	-	-	-	Lipids	Progestin Steroids	Primary	Inverse variance weighted (random effects)/ Wald ratio	-	-	-	-	-	-	-	-	2	1.2 (0.79-1.82)	0.399062	0.982765	-	-	-	-	-	-
	5alpha-pregnan-3-alpha or beta,20alpha-diol disulfate	-	-	-	-	-	Lipids	Progestin Steroids	Sensitivity	Inverse variance weighted (fixed effects)	-	-	-	-	-	-	-	-	2	1.2 (0.95-1.52)	0.135301	-	-	-	-	-	-	-
	5alpha-pregnan-3-alpha or beta,20alpha-diol disulfate	-	-	-	-	-	Lipids	Progestin Steroids	Sensitivity	Inverse variance weighted (multiplicative random effects)	-	-	-	-	-	-	-	-	2	1.2 (0.79-1.82)	0.399062	-	-	-	-	-	-	-
	5alpha-pregnan-3beta,20alpha-diol disulfate	37198	HMDB0094650	5748360	-	[H][C@@]1(CC[C@@]2([H])[C@]3([H])CC[C@@]4([H])C[C@H](CC[C@]4(C)[C@@]3([H])CC[C@]12C)OS(O)(=O)=O)[C@H](C)OS(O)(=O)=O	Lipids	Progestin Steroids	Primary	Inverse variance weighted (random effects)/ Wald ratio	-	-	-	-	2	0.98 (0.94-1.03)	0.494133	0.84396	2	1.04 (0.82-1.32)	0.741303	0.994872	2	0.99 (0.94-1.03)	0.543063	0.829277	0	0.649458
	5alpha-pregnan-3beta,20alpha-diol disulfate	37198	HMDB0094650	5748360	-	[H][C@@]1(CC[C@@]2([H])[C@]3([H])CC[C@@]4([H])C[C@H](CC[C@]4(C)[C@@]3([H])CC[C@]12C)OS(O)(=O)=O)[C@H](C)OS(O)(=O)=O	Lipids	Progestin Steroids	Sensitivity	Inverse variance weighted (fixed effects)	-	-	-	-	2	0.98 (0.95-1.02)	0.415891	-	2	1.04 (0.82-1.32)	0.741303	-	-	-	-	-	-	-
	5alpha-pregnan-3beta,20alpha-diol disulfate	37198	HMDB0094650	5748360	-	[H][C@@]1(CC[C@@]2([H])[C@]3([H])CC[C@@]4([H])C[C@H](CC[C@]4(C)[C@@]3([H])CC[C@]12C)OS(O)(=O)=O)[C@H](C)OS(O)(=O)=O	Lipids	Progestin Steroids	Sensitivity	Inverse variance weighted (multiplicative random effects)	-	-	-	-	2	0.98 (0.94-1.03)	0.494133	-	2	1.04 (1.03-1.05)	4.5e-31	-	-	-	-	-	-	-
	5alpha-pregnan-3beta,20alpha-diol monosulfate (2)	37200	-	-	-	-	Lipids	Progestin Steroids	Primary	Inverse variance weighted (random effects)/ Wald ratio	-	-	-	-	-	-	-	-	1	1.04 (0.78-1.4)	0.784059	0.994872	-	-	-	-	-	-
	5alpha-pregnan-3beta,20beta-diol monosulfate (1)	37196	-	-	-	-	Lipids	Progestin Steroids	Primary	Inverse variance weighted (random effects)/ Wald ratio	-	-	-	-	-	-	-	-	11	1.04 (0.94-1.16)	0.442455	0.987241	-	-	-	-	-	-
	5alpha-pregnan-3beta,20beta-diol monosulfate (1)	37196	-	-	-	-	Lipids	Progestin Steroids	Sensitivity	Inverse variance weighted (fixed effects)	-	-	-	-	-	-	-	-	11	1.04 (0.94-1.16)	0.442455	-	-	-	-	-	-	-
	5alpha-pregnan-3beta,20beta-diol monosulfate (1)	37196	-	-	-	-	Lipids	Progestin Steroids	Sensitivity	Inverse variance weighted (multiplicative random effects)	-	-	-	-	-	-	-	-	11	1.04 (0.97-1.12)	0.268413	-	-	-	-	-	-	-
	5alpha-pregnan-3beta,20beta-diol monosulfate (1)	37196	-	-	-	-	Lipids	Progestin Steroids	Sensitivity	MR Egger	-	-	-	-	-	-	-	-	11	1.1 (0.87-1.4)	0.424309	-	-	-	-	-	-	-
	5alpha-pregnan-3beta,20beta-diol monosulfate (1)	37196	-	-	-	-	Lipids	Progestin Steroids	Sensitivity	Weighted median	-	-	-	-	-	-	-	-	11	1.04 (0.91-1.2)	0.56344	-	-	-	-	-	-	-
	5alpha-pregnan-3beta,20beta-diol monosulfate (1)	37196	-	-	-	-	Lipids	Progestin Steroids	Sensitivity	Weighted mode	-	-	-	-	-	-	-	-	11	1.03 (0.88-1.21)	0.687699	-	-	-	-	-	-	-
	6-oxopiperidine-2-carboxylate	43231	HMDB61705	3014237	-	OC(=O)C1CCCC(O)=N1	Amino Acids	Lysine Metabolism	Primary	Inverse variance weighted (random effects)/ Wald ratio	-	-	-	-	-	-	-	-	5	1.11 (0.92-1.35)	0.275681	0.852888	-	-	-	-	-	-
	6-oxopiperidine-2-carboxylate	43231	HMDB61705	3014237	-	OC(=O)C1CCCC(O)=N1	Amino Acids	Lysine Metabolism	Sensitivity	Inverse variance weighted (fixed effects)	-	-	-	-	-	-	-	-	5	1.11 (0.96-1.29)	0.149566	-	-	-	-	-	-	-
	6-oxopiperidine-2-carboxylate	43231	HMDB61705	3014237	-	OC(=O)C1CCCC(O)=N1	Amino Acids	Lysine Metabolism	Sensitivity	Inverse variance weighted (multiplicative random effects)	-	-	-	-	-	-	-	-	5	1.11 (0.92-1.35)	0.275681	-	-	-	-	-	-	-
	6-oxopiperidine-2-carboxylate	43231	HMDB61705	3014237	-	OC(=O)C1CCCC(O)=N1	Amino Acids	Lysine Metabolism	Sensitivity	MR Egger	-	-	-	-	-	-	-	-	5	0.92 (0.58-1.47)	0.761172	-	-	-	-	-	-	-
	6-oxopiperidine-2-carboxylate	43231	HMDB61705	3014237	-	OC(=O)C1CCCC(O)=N1	Amino Acids	Lysine Metabolism	Sensitivity	Weighted median	-	-	-	-	-	-	-	-	5	1.04 (0.88-1.23)	0.628891	-	-	-	-	-	-	-
	6-oxopiperidine-2-carboxylate	43231	HMDB61705	3014237	-	OC(=O)C1CCCC(O)=N1	Amino Acids	Lysine Metabolism	Sensitivity	Weighted mode	-	-	-	-	-	-	-	-	5	1.03 (0.87-1.22)	0.744732	-	-	-	-	-	-	-
	7-alpha-hydroxy-3-oxo-4-cholestenoate (7-Hoca)	36776	HMDB12458	3081085	C17337	[H][C@@]1(CC[C@@]2([H])[C@]3([H])[C@H](O)CC4=CC(=O)CC[C@]4(C)[C@@]3([H])CC[C@]12C)[C@H](C)CCCC(C)C(O)=O	Lipids	Sterol	Primary	Inverse variance weighted (random effects)/ Wald ratio	-	-	-	-	1	1 (0.95-1.05)	0.901365	0.960725	-	-	-	-	-	-	-	-	-	-
	7-methylguanine	35114	HMDB00897	11361	C02242	CN1C=NC2=C1C(=O)N=C(N)N2	Nucleotides	Purine Metabolism, Guanine containing	Primary	Inverse variance weighted (random effects)/ Wald ratio	-	-	-	-	-	-	-	-	1	0.99 (0.7-1.41)	0.97336	0.999026	-	-	-	-	-	-
	7-methylxanthine	34390	HMDB01991	68374	C16353	CN1C=NC2=C1C(=O)NC(=O)N2	Xenobiotics	Xanthine Metabolism	Primary	Inverse variance weighted (random effects)/ Wald ratio	-	-	-	-	-	-	-	-	2	0.85 (0.62-1.16)	0.295081	0.860923	-	-	-	-	-	-
	7-methylxanthine	34390	HMDB01991	68374	C16353	CN1C=NC2=C1C(=O)NC(=O)N2	Xenobiotics	Xanthine Metabolism	Sensitivity	Inverse variance weighted (fixed effects)	-	-	-	-	-	-	-	-	2	0.85 (0.62-1.16)	0.295081	-	-	-	-	-	-	-
	7-methylxanthine	34390	HMDB01991	68374	C16353	CN1C=NC2=C1C(=O)NC(=O)N2	Xenobiotics	Xanthine Metabolism	Sensitivity	Inverse variance weighted (multiplicative random effects)	-	-	-	-	-	-	-	-	2	0.85 (0.81-0.89)	1.37e-11	-	-	-	-	-	-	-
	9,10-DiHOME	38399	HMDB04704	9966640	C14828	CCCCC\C=C/C[C@@H](O)[C@H](O)CCCCCCCC(O)=O	Lipids	Fatty Acid, Dihydroxy	Primary	Inverse variance weighted (random effects)/ Wald ratio	-	-	-	-	-	-	-	-	1	0.87 (0.54-1.39)	0.548503	0.994872	-	-	-	-	-	-
	ADpSGEGDFXAEGGGVR*	57712	-	-	-	-	Peptides	Fibrinogen Cleavage Peptide	Primary	Inverse variance weighted (random effects)/ Wald ratio	-	-	-	-	-	-	-	-	5	0.97 (0.83-1.13)	0.688348	0.994872	-	-	-	-	-	-
	ADpSGEGDFXAEGGGVR*	57712	-	-	-	-	Peptides	Fibrinogen Cleavage Peptide	Sensitivity	Inverse variance weighted (fixed effects)	-	-	-	-	-	-	-	-	5	0.97 (0.84-1.11)	0.653566	-	-	-	-	-	-	-
	ADpSGEGDFXAEGGGVR*	57712	-	-	-	-	Peptides	Fibrinogen Cleavage Peptide	Sensitivity	Inverse variance weighted (multiplicative random effects)	-	-	-	-	-	-	-	-	5	0.97 (0.83-1.13)	0.688348	-	-	-	-	-	-	-
	ADpSGEGDFXAEGGGVR*	57712	-	-	-	-	Peptides	Fibrinogen Cleavage Peptide	Sensitivity	MR Egger	-	-	-	-	-	-	-	-	5	0.95 (0.54-1.69)	0.882704	-	-	-	-	-	-	-
	ADpSGEGDFXAEGGGVR*	57712	-	-	-	-	Peptides	Fibrinogen Cleavage Peptide	Sensitivity	Weighted median	-	-	-	-	-	-	-	-	5	0.97 (0.81-1.16)	0.714396	-	-	-	-	-	-	-
	ADpSGEGDFXAEGGGVR*	57712	-	-	-	-	Peptides	Fibrinogen Cleavage Peptide	Sensitivity	Weighted mode	-	-	-	-	-	-	-	-	5	1.05 (0.84-1.31)	0.700511	-	-	-	-	-	-	-
	DSGEGDFXAEGGGVR*	31548	-	-	-	-	Peptides	Fibrinogen Cleavage Peptide	Primary	Inverse variance weighted (random effects)/ Wald ratio	2	0.94 (0.85-1.04)	0.212408	0.863252	2	0.98 (0.96-1)	0.117812	0.348587	2	0.7 (0.52-0.95)	0.0196028	0.157566	3	0.98 (0.95-1)	0.0462584	0.195479	63.4738	0.064715
	DSGEGDFXAEGGGVR*	31548	-	-	-	-	Peptides	Fibrinogen Cleavage Peptide	Sensitivity	Inverse variance weighted (fixed effects)	2	0.94 (0.85-1.04)	0.212408	-	2	0.98 (0.96-1)	0.117812	-	2	0.7 (0.53-0.93)	0.0150983	-	-	-	-	-	-	-
	DSGEGDFXAEGGGVR*	31548	-	-	-	-	Peptides	Fibrinogen Cleavage Peptide	Sensitivity	Inverse variance weighted (multiplicative random effects)	2	0.94 (0.92-0.96)	2.93221e-07	-	2	0.98 (0.98-0.99)	5.43479e-13	-	2	0.7 (0.52-0.95)	0.0196028	-	-	-	-	-	-	-
	HWESASLLR	44657	-	-	-	-	Peptides	Polypeptide	Primary	Inverse variance weighted (random effects)/ Wald ratio	2	0.95 (0.88-1.02)	0.184664	0.863252	3	1.01 (0.99-1.04)	0.281165	0.562331	-	-	-	-	2	1.01 (0.98-1.03)	0.563648	0.839901	61.3541	0.107704
	HWESASLLR	44657	-	-	-	-	Peptides	Polypeptide	Sensitivity	Inverse variance weighted (fixed effects)	2	0.95 (0.88-1.02)	0.184664	-	3	1.01 (0.99-1.04)	0.246682	-	-	-	-	-	-	-	-	-	-	-
	HWESASLLR	44657	-	-	-	-	Peptides	Polypeptide	Sensitivity	Inverse variance weighted (multiplicative random effects)	2	0.95 (0.92-0.98)	0.00236719	-	3	1.01 (0.99-1.04)	0.281165	-	-	-	-	-	-	-	-	-	-	-
	HWESASLLR	44657	-	-	-	-	Peptides	Polypeptide	Sensitivity	MR Egger	-	-	-	-	3	0.98 (0.86-1.12)	0.842104	-	-	-	-	-	-	-	-	-	-	-
	HWESASLLR	44657	-	-	-	-	Peptides	Polypeptide	Sensitivity	Weighted median	-	-	-	-	3	1.01 (0.98-1.05)	0.351635	-	-	-	-	-	-	-	-	-	-	-
	HWESASLLR	44657	-	-	-	-	Peptides	Polypeptide	Sensitivity	Weighted mode	-	-	-	-	3	1.02 (0.98-1.07)	0.375315	-	-	-	-	-	-	-	-	-	-	-
	N('1)-acetylspermidine	-	HMDB01276	496	C00612	CC(=O)NCCCNCCCCN	Amino Acids	Polyamine Metabolism	Primary	Inverse variance weighted (random effects)/ Wald ratio	-	-	-	-	-	-	-	-	6	0.98 (0.84-1.15)	0.817391	0.994872	-	-	-	-	-	-
	N('1)-acetylspermidine	-	HMDB01276	496	C00612	CC(=O)NCCCNCCCCN	Amino Acids	Polyamine Metabolism	Sensitivity	Inverse variance weighted (fixed effects)	-	-	-	-	-	-	-	-	6	0.98 (0.84-1.15)	0.817391	-	-	-	-	-	-	-
	N('1)-acetylspermidine	-	HMDB01276	496	C00612	CC(=O)NCCCNCCCCN	Amino Acids	Polyamine Metabolism	Sensitivity	Inverse variance weighted (multiplicative random effects)	-	-	-	-	-	-	-	-	6	0.98 (0.86-1.12)	0.781836	-	-	-	-	-	-	-
	N('1)-acetylspermidine	-	HMDB01276	496	C00612	CC(=O)NCCCNCCCCN	Amino Acids	Polyamine Metabolism	Sensitivity	MR Egger	-	-	-	-	-	-	-	-	6	0.9 (0.61-1.32)	0.605781	-	-	-	-	-	-	-
	N('1)-acetylspermidine	-	HMDB01276	496	C00612	CC(=O)NCCCNCCCCN	Amino Acids	Polyamine Metabolism	Sensitivity	Weighted median	-	-	-	-	-	-	-	-	6	1.02 (0.84-1.24)	0.855966	-	-	-	-	-	-	-
	N('1)-acetylspermidine	-	HMDB01276	496	C00612	CC(=O)NCCCNCCCCN	Amino Acids	Polyamine Metabolism	Sensitivity	Weighted mode	-	-	-	-	-	-	-	-	6	1.07 (0.81-1.4)	0.668045	-	-	-	-	-	-	-
	N-(2-furoyl)glycine	31536	HMDB00439	21863	-	OC(=O)CNC(=O)C1=CC=CO1	Xenobiotics	Food Component/Plant	Primary	Inverse variance weighted (random effects)/ Wald ratio	-	-	-	-	-	-	-	-	1	0.99 (0.71-1.37)	0.929311	0.999021	-	-	-	-	-	-
	N-acetyl-1-methylhistidine*	43255	-	193270	-	-	Amino Acids	Histidine Metabolism	Primary	Inverse variance weighted (random effects)/ Wald ratio	-	-	-	-	-	-	-	-	35	0.94 (0.89-0.99)	0.0196499	0.157566	-	-	-	-	-	-
	N-acetyl-1-methylhistidine*	43255	-	193270	-	-	Amino Acids	Histidine Metabolism	Sensitivity	Inverse variance weighted (fixed effects)	-	-	-	-	-	-	-	-	35	0.94 (0.89-0.99)	0.0196499	-	-	-	-	-	-	-
	N-acetyl-1-methylhistidine*	43255	-	193270	-	-	Amino Acids	Histidine Metabolism	Sensitivity	Inverse variance weighted (multiplicative random effects)	-	-	-	-	-	-	-	-	35	0.94 (0.9-0.98)	0.00517659	-	-	-	-	-	-	-
	N-acetyl-1-methylhistidine*	43255	-	193270	-	-	Amino Acids	Histidine Metabolism	Sensitivity	MR Egger	-	-	-	-	-	-	-	-	35	0.95 (0.86-1.04)	0.274303	-	-	-	-	-	-	-
	N-acetyl-1-methylhistidine*	43255	-	193270	-	-	Amino Acids	Histidine Metabolism	Sensitivity	Weighted median	-	-	-	-	-	-	-	-	35	0.95 (0.89-1.02)	0.146863	-	-	-	-	-	-	-
	N-acetyl-1-methylhistidine*	43255	-	193270	-	-	Amino Acids	Histidine Metabolism	Sensitivity	Weighted mode	-	-	-	-	-	-	-	-	35	0.95 (0.88-1.02)	0.143315	-	-	-	-	-	-	-
	N-acetyl-3-methylhistidine	-	-	-	-	-	Amino Acids	Histidine Metabolism	Primary	Inverse variance weighted (random effects)/ Wald ratio	-	-	-	-	-	-	-	-	2	0.81 (0.61-1.08)	0.145764	0.62201	-	-	-	-	-	-
	N-acetyl-3-methylhistidine	-	-	-	-	-	Amino Acids	Histidine Metabolism	Sensitivity	Inverse variance weighted (fixed effects)	-	-	-	-	-	-	-	-	2	0.81 (0.68-0.96)	0.0172262	-	-	-	-	-	-	-
	N-acetyl-3-methylhistidine	-	-	-	-	-	Amino Acids	Histidine Metabolism	Sensitivity	Inverse variance weighted (multiplicative random effects)	-	-	-	-	-	-	-	-	2	0.81 (0.61-1.08)	0.145764	-	-	-	-	-	-	-
	N-acetyl-beta-alanine	37432	HMDB0061880	76406	C01073	CC(=O)NCCC(O)=O	Nucleotides	Pyrimidine Metabolism, Uracil containing	Primary	Inverse variance weighted (random effects)/ Wald ratio	-	-	-	-	4	1 (0.98-1.03)	0.756587	0.909243	2	1.03 (0.77-1.39)	0.83662	0.997496	2	1 (0.98-1.03)	0.742499	0.916238	0	0.861007
	N-acetyl-beta-alanine	37432	HMDB0061880	76406	C01073	CC(=O)NCCC(O)=O	Nucleotides	Pyrimidine Metabolism, Uracil containing	Sensitivity	Inverse variance weighted (fixed effects)	-	-	-	-	4	1 (0.98-1.03)	0.737096	-	2	1.03 (0.77-1.39)	0.83662	-	-	-	-	-	-	-
	N-acetyl-beta-alanine	37432	HMDB0061880	76406	C01073	CC(=O)NCCC(O)=O	Nucleotides	Pyrimidine Metabolism, Uracil containing	Sensitivity	Inverse variance weighted (multiplicative random effects)	-	-	-	-	4	1 (0.98-1.03)	0.756587	-	2	1.03 (0.88-1.21)	0.707261	-	-	-	-	-	-	-
	N-acetyl-beta-alanine	37432	HMDB0061880	76406	C01073	CC(=O)NCCC(O)=O	Nucleotides	Pyrimidine Metabolism, Uracil containing	Sensitivity	MR Egger	-	-	-	-	4	0.97 (0.84-1.12)	0.717698	-	-	-	-	-	-	-	-	-	-	-
	N-acetyl-beta-alanine	37432	HMDB0061880	76406	C01073	CC(=O)NCCC(O)=O	Nucleotides	Pyrimidine Metabolism, Uracil containing	Sensitivity	Weighted median	-	-	-	-	4	1.01 (0.98-1.04)	0.639422	-	-	-	-	-	-	-	-	-	-	-
	N-acetyl-beta-alanine	37432	HMDB0061880	76406	C01073	CC(=O)NCCC(O)=O	Nucleotides	Pyrimidine Metabolism, Uracil containing	Sensitivity	Weighted mode	-	-	-	-	4	1.01 (0.97-1.06)	0.592576	-	-	-	-	-	-	-	-	-	-	-
	N-acetyl-cadaverine	43530	HMDB02284	189087	-	CC(=O)NCCCCCN	Amino Acids	Lysine Metabolism	Primary	Inverse variance weighted (random effects)/ Wald ratio	-	-	-	-	-	-	-	-	1	1.13 (0.75-1.7)	0.568407	0.994872	-	-	-	-	-	-
	N-acetylalanine	1585	HMDB00766	88064	C02847	C[C@H](NC(C)=O)C(O)=O	Amino Acids	Alanine and Aspartate Metabolism	Primary	Inverse variance weighted (random effects)/ Wald ratio	1	1.02 (0.94-1.09)	0.682869	0.878415	-	-	-	-	-	-	-	-	-	-	-	-	-	-
	N-acetylalliin	45404	-	-	-	-	Xenobiotics	Food Component/Plant	Primary	Inverse variance weighted (random effects)/ Wald ratio	-	-	-	-	-	-	-	-	4	0.87 (0.73-1.03)	0.100086	0.510352	-	-	-	-	-	-
	N-acetylalliin	45404	-	-	-	-	Xenobiotics	Food Component/Plant	Sensitivity	Inverse variance weighted (fixed effects)	-	-	-	-	-	-	-	-	4	0.87 (0.73-1.03)	0.100086	-	-	-	-	-	-	-
	N-acetylalliin	45404	-	-	-	-	Xenobiotics	Food Component/Plant	Sensitivity	Inverse variance weighted (multiplicative random effects)	-	-	-	-	-	-	-	-	4	0.87 (0.75-0.99)	0.0387381	-	-	-	-	-	-	-
	N-acetylalliin	45404	-	-	-	-	Xenobiotics	Food Component/Plant	Sensitivity	MR Egger	-	-	-	-	-	-	-	-	4	1.17 (0.47-2.92)	0.765972	-	-	-	-	-	-	-
	N-acetylalliin	45404	-	-	-	-	Xenobiotics	Food Component/Plant	Sensitivity	Weighted median	-	-	-	-	-	-	-	-	4	0.84 (0.69-1.03)	0.094715	-	-	-	-	-	-	-
	N-acetylalliin	45404	-	-	-	-	Xenobiotics	Food Component/Plant	Sensitivity	Weighted mode	-	-	-	-	-	-	-	-	4	0.84 (0.69-1.03)	0.185198	-	-	-	-	-	-	-
	N-acetylarginine	33953	HMDB04620	67427	C02562	CC(=O)N[C@@H](CCCNC(N)=N)C(O)=O	Amino Acids	Urea cycle; Arginine and Proline Metabolism	Primary	Inverse variance weighted (random effects)/ Wald ratio	-	-	-	-	-	-	-	-	42	0.95 (0.91-1)	0.055926	0.34177	-	-	-	-	-	-
	N-acetylarginine	33953	HMDB04620	67427	C02562	CC(=O)N[C@@H](CCCNC(N)=N)C(O)=O	Amino Acids	Urea cycle; Arginine and Proline Metabolism	Sensitivity	Inverse variance weighted (fixed effects)	-	-	-	-	-	-	-	-	42	0.95 (0.91-1)	0.055926	-	-	-	-	-	-	-
	N-acetylarginine	33953	HMDB04620	67427	C02562	CC(=O)N[C@@H](CCCNC(N)=N)C(O)=O	Amino Acids	Urea cycle; Arginine and Proline Metabolism	Sensitivity	Inverse variance weighted (multiplicative random effects)	-	-	-	-	-	-	-	-	42	0.95 (0.91-1)	0.0323736	-	-	-	-	-	-	-
	N-acetylarginine	33953	HMDB04620	67427	C02562	CC(=O)N[C@@H](CCCNC(N)=N)C(O)=O	Amino Acids	Urea cycle; Arginine and Proline Metabolism	Sensitivity	MR Egger	-	-	-	-	-	-	-	-	42	0.93 (0.85-1.01)	0.100683	-	-	-	-	-	-	-
	N-acetylarginine	33953	HMDB04620	67427	C02562	CC(=O)N[C@@H](CCCNC(N)=N)C(O)=O	Amino Acids	Urea cycle; Arginine and Proline Metabolism	Sensitivity	Weighted median	-	-	-	-	-	-	-	-	42	0.95 (0.88-1.02)	0.15362	-	-	-	-	-	-	-
	N-acetylarginine	33953	HMDB04620	67427	C02562	CC(=O)N[C@@H](CCCNC(N)=N)C(O)=O	Amino Acids	Urea cycle; Arginine and Proline Metabolism	Sensitivity	Weighted mode	-	-	-	-	-	-	-	-	42	0.94 (0.88-1.01)	0.100817	-	-	-	-	-	-	-
	N-acetylasparagine	33942	HMDB06028	99715	-	CC(=O)N[C@@H](CC(N)=O)C(O)=O	Amino Acids	Alanine and Aspartate Metabolism	Primary	Inverse variance weighted (random effects)/ Wald ratio	-	-	-	-	-	-	-	-	38	0.93 (0.89-0.98)	0.0079859	0.0988255	-	-	-	-	-	-
	N-acetylasparagine	33942	HMDB06028	99715	-	CC(=O)N[C@@H](CC(N)=O)C(O)=O	Amino Acids	Alanine and Aspartate Metabolism	Sensitivity	Inverse variance weighted (fixed effects)	-	-	-	-	-	-	-	-	38	0.93 (0.89-0.98)	0.0079859	-	-	-	-	-	-	-
	N-acetylasparagine	33942	HMDB06028	99715	-	CC(=O)N[C@@H](CC(N)=O)C(O)=O	Amino Acids	Alanine and Aspartate Metabolism	Sensitivity	Inverse variance weighted (multiplicative random effects)	-	-	-	-	-	-	-	-	38	0.93 (0.89-0.98)	0.00428553	-	-	-	-	-	-	-
	N-acetylasparagine	33942	HMDB06028	99715	-	CC(=O)N[C@@H](CC(N)=O)C(O)=O	Amino Acids	Alanine and Aspartate Metabolism	Sensitivity	MR Egger	-	-	-	-	-	-	-	-	38	0.97 (0.88-1.07)	0.564781	-	-	-	-	-	-	-
	N-acetylasparagine	33942	HMDB06028	99715	-	CC(=O)N[C@@H](CC(N)=O)C(O)=O	Amino Acids	Alanine and Aspartate Metabolism	Sensitivity	Weighted median	-	-	-	-	-	-	-	-	38	0.95 (0.88-1.02)	0.128977	-	-	-	-	-	-	-
	N-acetylasparagine	33942	HMDB06028	99715	-	CC(=O)N[C@@H](CC(N)=O)C(O)=O	Amino Acids	Alanine and Aspartate Metabolism	Sensitivity	Weighted mode	-	-	-	-	-	-	-	-	38	0.94 (0.88-1.01)	0.088662	-	-	-	-	-	-	-
	N-acetylcarnosine	43488	HMDB12881	9903482	-	CC(=O)NCCC(=O)NC(CC1=CN=CN1)C(O)=O	Peptides	Dipeptide Derivative	Primary	Inverse variance weighted (random effects)/ Wald ratio	-	-	-	-	-	-	-	-	8	0.98 (0.87-1.11)	0.761144	0.994872	-	-	-	-	-	-
	N-acetylcarnosine	43488	HMDB12881	9903482	-	CC(=O)NCCC(=O)NC(CC1=CN=CN1)C(O)=O	Peptides	Dipeptide Derivative	Sensitivity	Inverse variance weighted (fixed effects)	-	-	-	-	-	-	-	-	8	0.98 (0.87-1.11)	0.761144	-	-	-	-	-	-	-
	N-acetylcarnosine	43488	HMDB12881	9903482	-	CC(=O)NCCC(=O)NC(CC1=CN=CN1)C(O)=O	Peptides	Dipeptide Derivative	Sensitivity	Inverse variance weighted (multiplicative random effects)	-	-	-	-	-	-	-	-	8	0.98 (0.87-1.1)	0.752357	-	-	-	-	-	-	-
	N-acetylcarnosine	43488	HMDB12881	9903482	-	CC(=O)NCCC(=O)NC(CC1=CN=CN1)C(O)=O	Peptides	Dipeptide Derivative	Sensitivity	MR Egger	-	-	-	-	-	-	-	-	8	1.42 (0.93-2.17)	0.154334	-	-	-	-	-	-	-
	N-acetylcarnosine	43488	HMDB12881	9903482	-	CC(=O)NCCC(=O)NC(CC1=CN=CN1)C(O)=O	Peptides	Dipeptide Derivative	Sensitivity	Weighted median	-	-	-	-	-	-	-	-	8	1 (0.85-1.18)	0.970789	-	-	-	-	-	-	-
	N-acetylcarnosine	43488	HMDB12881	9903482	-	CC(=O)NCCC(=O)NC(CC1=CN=CN1)C(O)=O	Peptides	Dipeptide Derivative	Sensitivity	Weighted mode	-	-	-	-	-	-	-	-	8	0.99 (0.79-1.24)	0.920078	-	-	-	-	-	-	-
	N-acetylcitrulline	48434	HMDB00856	656979	C15532	CC(=O)N[C@@H](CCCNC(N)=O)C(O)=O	Amino Acids	Urea cycle; Arginine and Proline Metabolism	Primary	Inverse variance weighted (random effects)/ Wald ratio	-	-	-	-	-	-	-	-	40	0.96 (0.92-1.01)	0.149108	0.6257	-	-	-	-	-	-
	N-acetylcitrulline	48434	HMDB00856	656979	C15532	CC(=O)N[C@@H](CCCNC(N)=O)C(O)=O	Amino Acids	Urea cycle; Arginine and Proline Metabolism	Sensitivity	Inverse variance weighted (fixed effects)	-	-	-	-	-	-	-	-	40	0.96 (0.92-1.01)	0.149108	-	-	-	-	-	-	-
	N-acetylcitrulline	48434	HMDB00856	656979	C15532	CC(=O)N[C@@H](CCCNC(N)=O)C(O)=O	Amino Acids	Urea cycle; Arginine and Proline Metabolism	Sensitivity	Inverse variance weighted (multiplicative random effects)	-	-	-	-	-	-	-	-	40	0.96 (0.92-1.01)	0.131118	-	-	-	-	-	-	-
	N-acetylcitrulline	48434	HMDB00856	656979	C15532	CC(=O)N[C@@H](CCCNC(N)=O)C(O)=O	Amino Acids	Urea cycle; Arginine and Proline Metabolism	Sensitivity	MR Egger	-	-	-	-	-	-	-	-	40	0.9 (0.81-0.99)	0.0326995	-	-	-	-	-	-	-
	N-acetylcitrulline	48434	HMDB00856	656979	C15532	CC(=O)N[C@@H](CCCNC(N)=O)C(O)=O	Amino Acids	Urea cycle; Arginine and Proline Metabolism	Sensitivity	Weighted median	-	-	-	-	-	-	-	-	40	0.94 (0.88-1.02)	0.125711	-	-	-	-	-	-	-
	N-acetylcitrulline	48434	HMDB00856	656979	C15532	CC(=O)N[C@@H](CCCNC(N)=O)C(O)=O	Amino Acids	Urea cycle; Arginine and Proline Metabolism	Sensitivity	Weighted mode	-	-	-	-	-	-	-	-	40	0.94 (0.88-1.01)	0.11545	-	-	-	-	-	-	-
	N-acetylglucosamine/N-acetylgalactosamine	46539	HMDB00215	24139	C00140	CC(=O)N[C@H]1C(O)O[C@H](CO)[C@@H](O)[C@@H]1O	Carbohydrates	Aminosugar Metabolism	Primary	Inverse variance weighted (random effects)/ Wald ratio	-	-	-	-	-	-	-	-	7	1.11 (0.96-1.28)	0.156741	0.6257	-	-	-	-	-	-
	N-acetylglucosamine/N-acetylgalactosamine	46539	HMDB00215	24139	C00140	CC(=O)N[C@H]1C(O)O[C@H](CO)[C@@H](O)[C@@H]1O	Carbohydrates	Aminosugar Metabolism	Sensitivity	Inverse variance weighted (fixed effects)	-	-	-	-	-	-	-	-	7	1.11 (0.98-1.26)	0.115271	-	-	-	-	-	-	-
	N-acetylglucosamine/N-acetylgalactosamine	46539	HMDB00215	24139	C00140	CC(=O)N[C@H]1C(O)O[C@H](CO)[C@@H](O)[C@@H]1O	Carbohydrates	Aminosugar Metabolism	Sensitivity	Inverse variance weighted (multiplicative random effects)	-	-	-	-	-	-	-	-	7	1.11 (0.96-1.28)	0.156741	-	-	-	-	-	-	-
	N-acetylglucosamine/N-acetylgalactosamine	46539	HMDB00215	24139	C00140	CC(=O)N[C@H]1C(O)O[C@H](CO)[C@@H](O)[C@@H]1O	Carbohydrates	Aminosugar Metabolism	Sensitivity	MR Egger	-	-	-	-	-	-	-	-	7	1.06 (0.64-1.76)	0.826491	-	-	-	-	-	-	-
	N-acetylglucosamine/N-acetylgalactosamine	46539	HMDB00215	24139	C00140	CC(=O)N[C@H]1C(O)O[C@H](CO)[C@@H](O)[C@@H]1O	Carbohydrates	Aminosugar Metabolism	Sensitivity	Weighted median	-	-	-	-	-	-	-	-	7	1.14 (0.95-1.35)	0.153173	-	-	-	-	-	-	-
	N-acetylglucosamine/N-acetylgalactosamine	46539	HMDB00215	24139	C00140	CC(=O)N[C@H]1C(O)O[C@H](CO)[C@@H](O)[C@@H]1O	Carbohydrates	Aminosugar Metabolism	Sensitivity	Weighted mode	-	-	-	-	-	-	-	-	7	1.15 (0.94-1.41)	0.226508	-	-	-	-	-	-	-
	N-acetylglucosaminylasparagine	48149	HMDB00489	123826	C04540	CC(=O)N[C@@H]1[C@@H](O)[C@H](O)[C@@H](CO)O[C@H]1NC(=O)C[C@H](N)C(O)=O	Carbohydrates	Aminosugar Metabolism	Primary	Inverse variance weighted (random effects)/ Wald ratio	-	-	-	-	-	-	-	-	11	0.95 (0.86-1.05)	0.299149	0.860923	-	-	-	-	-	-
	N-acetylglucosaminylasparagine	48149	HMDB00489	123826	C04540	CC(=O)N[C@@H]1[C@@H](O)[C@H](O)[C@@H](CO)O[C@H]1NC(=O)C[C@H](N)C(O)=O	Carbohydrates	Aminosugar Metabolism	Sensitivity	Inverse variance weighted (fixed effects)	-	-	-	-	-	-	-	-	11	0.95 (0.88-1.02)	0.176108	-	-	-	-	-	-	-
	N-acetylglucosaminylasparagine	48149	HMDB00489	123826	C04540	CC(=O)N[C@@H]1[C@@H](O)[C@H](O)[C@@H](CO)O[C@H]1NC(=O)C[C@H](N)C(O)=O	Carbohydrates	Aminosugar Metabolism	Sensitivity	Inverse variance weighted (multiplicative random effects)	-	-	-	-	-	-	-	-	11	0.95 (0.86-1.05)	0.299149	-	-	-	-	-	-	-
	N-acetylglucosaminylasparagine	48149	HMDB00489	123826	C04540	CC(=O)N[C@@H]1[C@@H](O)[C@H](O)[C@@H](CO)O[C@H]1NC(=O)C[C@H](N)C(O)=O	Carbohydrates	Aminosugar Metabolism	Sensitivity	MR Egger	-	-	-	-	-	-	-	-	11	0.92 (0.72-1.17)	0.514415	-	-	-	-	-	-	-
	N-acetylglucosaminylasparagine	48149	HMDB00489	123826	C04540	CC(=O)N[C@@H]1[C@@H](O)[C@H](O)[C@@H](CO)O[C@H]1NC(=O)C[C@H](N)C(O)=O	Carbohydrates	Aminosugar Metabolism	Sensitivity	Weighted median	-	-	-	-	-	-	-	-	11	0.9 (0.81-0.99)	0.034979	-	-	-	-	-	-	-
	N-acetylglucosaminylasparagine	48149	HMDB00489	123826	C04540	CC(=O)N[C@@H]1[C@@H](O)[C@H](O)[C@@H](CO)O[C@H]1NC(=O)C[C@H](N)C(O)=O	Carbohydrates	Aminosugar Metabolism	Sensitivity	Weighted mode	-	-	-	-	-	-	-	-	11	0.89 (0.8-0.98)	0.0478225	-	-	-	-	-	-	-
	N-acetylglutamine	33943	HMDB06029	182230	C02716	CC(=O)N[C@@H](CCC(N)=O)C(O)=O	Amino Acids	Glutamate Metabolism	Primary	Inverse variance weighted (random effects)/ Wald ratio	-	-	-	-	-	-	-	-	14	0.9 (0.83-0.98)	0.0110422	0.116296	-	-	-	-	-	-
	N-acetylglutamine	33943	HMDB06029	182230	C02716	CC(=O)N[C@@H](CCC(N)=O)C(O)=O	Amino Acids	Glutamate Metabolism	Sensitivity	Inverse variance weighted (fixed effects)	-	-	-	-	-	-	-	-	14	0.9 (0.83-0.98)	0.0110422	-	-	-	-	-	-	-
	N-acetylglutamine	33943	HMDB06029	182230	C02716	CC(=O)N[C@@H](CCC(N)=O)C(O)=O	Amino Acids	Glutamate Metabolism	Sensitivity	Inverse variance weighted (multiplicative random effects)	-	-	-	-	-	-	-	-	14	0.9 (0.84-0.97)	0.00327068	-	-	-	-	-	-	-
	N-acetylglutamine	33943	HMDB06029	182230	C02716	CC(=O)N[C@@H](CCC(N)=O)C(O)=O	Amino Acids	Glutamate Metabolism	Sensitivity	MR Egger	-	-	-	-	-	-	-	-	14	0.93 (0.79-1.1)	0.411671	-	-	-	-	-	-	-
	N-acetylglutamine	33943	HMDB06029	182230	C02716	CC(=O)N[C@@H](CCC(N)=O)C(O)=O	Amino Acids	Glutamate Metabolism	Sensitivity	Weighted median	-	-	-	-	-	-	-	-	14	0.91 (0.82-1.01)	0.0633919	-	-	-	-	-	-	-
	N-acetylglutamine	33943	HMDB06029	182230	C02716	CC(=O)N[C@@H](CCC(N)=O)C(O)=O	Amino Acids	Glutamate Metabolism	Sensitivity	Weighted mode	-	-	-	-	-	-	-	-	14	0.91 (0.83-1)	0.0639383	-	-	-	-	-	-	-
	N-acetylglycine	27710	HMDB00532	10972	-	CC(=O)NCC(O)=O	Amino Acids	Glycine, Serine and Threonine Metabolism	Primary	Inverse variance weighted (random effects)/ Wald ratio	2	0.93 (0.85-1.02)	0.139911	0.863252	1	1.01 (0.97-1.04)	0.605951	0.856985	2	0.95 (0.8-1.12)	0.534126	0.994872	3	1 (0.97-1.03)	0.882432	0.939606	28.8158	0.245414
	N-acetylglycine	27710	HMDB00532	10972	-	CC(=O)NCC(O)=O	Amino Acids	Glycine, Serine and Threonine Metabolism	Sensitivity	Inverse variance weighted (fixed effects)	2	0.93 (0.85-1.02)	0.139911	-	-	-	-	-	2	0.95 (0.8-1.12)	0.534126	-	-	-	-	-	-	-
	N-acetylglycine	27710	HMDB00532	10972	-	CC(=O)NCC(O)=O	Amino Acids	Glycine, Serine and Threonine Metabolism	Sensitivity	Inverse variance weighted (multiplicative random effects)	2	0.93 (0.85-1.02)	0.129899	-	-	-	-	-	2	0.95 (0.87-1.03)	0.208382	-	-	-	-	-	-	-
	N-acetylhistamine	48679	HMDB0013253	69602	C05135	CC(=O)NCCC1=CN=CN1	Amino Acids	Histidine Metabolism	Primary	Inverse variance weighted (random effects)/ Wald ratio	-	-	-	-	-	-	-	-	1	1.11 (0.86-1.44)	0.430787	0.987241	-	-	-	-	-	-
	N-acetylhistidine	33946	HMDB32055	75619	C02997	CC(=O)N[C@@H](CC1=CNC=N1)C(O)=O	Amino Acids	Histidine Metabolism	Primary	Inverse variance weighted (random effects)/ Wald ratio	-	-	-	-	-	-	-	-	13	1.03 (0.91-1.17)	0.66625	0.994872	-	-	-	-	-	-
	N-acetylhistidine	33946	HMDB32055	75619	C02997	CC(=O)N[C@@H](CC1=CNC=N1)C(O)=O	Amino Acids	Histidine Metabolism	Sensitivity	Inverse variance weighted (fixed effects)	-	-	-	-	-	-	-	-	13	1.03 (0.95-1.12)	0.51217	-	-	-	-	-	-	-
	N-acetylhistidine	33946	HMDB32055	75619	C02997	CC(=O)N[C@@H](CC1=CNC=N1)C(O)=O	Amino Acids	Histidine Metabolism	Sensitivity	Inverse variance weighted (multiplicative random effects)	-	-	-	-	-	-	-	-	13	1.03 (0.91-1.17)	0.66625	-	-	-	-	-	-	-
	N-acetylhistidine	33946	HMDB32055	75619	C02997	CC(=O)N[C@@H](CC1=CNC=N1)C(O)=O	Amino Acids	Histidine Metabolism	Sensitivity	MR Egger	-	-	-	-	-	-	-	-	13	0.98 (0.71-1.36)	0.928079	-	-	-	-	-	-	-
	N-acetylhistidine	33946	HMDB32055	75619	C02997	CC(=O)N[C@@H](CC1=CNC=N1)C(O)=O	Amino Acids	Histidine Metabolism	Sensitivity	Weighted median	-	-	-	-	-	-	-	-	13	1.05 (0.93-1.19)	0.423862	-	-	-	-	-	-	-
	N-acetylhistidine	33946	HMDB32055	75619	C02997	CC(=O)N[C@@H](CC1=CNC=N1)C(O)=O	Amino Acids	Histidine Metabolism	Sensitivity	Weighted mode	-	-	-	-	-	-	-	-	13	1.05 (0.94-1.18)	0.411584	-	-	-	-	-	-	-
	N-acetylkynurenine (2)	48757	-	-	-	-	Amino Acids	Tryptophan Metabolism	Primary	Inverse variance weighted (random effects)/ Wald ratio	-	-	-	-	-	-	-	-	14	0.91 (0.84-0.98)	0.0162879	0.147151	-	-	-	-	-	-
	N-acetylkynurenine (2)	48757	-	-	-	-	Amino Acids	Tryptophan Metabolism	Sensitivity	Inverse variance weighted (fixed effects)	-	-	-	-	-	-	-	-	14	0.91 (0.84-0.98)	0.0162879	-	-	-	-	-	-	-
	N-acetylkynurenine (2)	48757	-	-	-	-	Amino Acids	Tryptophan Metabolism	Sensitivity	Inverse variance weighted (multiplicative random effects)	-	-	-	-	-	-	-	-	14	0.91 (0.84-0.97)	0.00665761	-	-	-	-	-	-	-
	N-acetylkynurenine (2)	48757	-	-	-	-	Amino Acids	Tryptophan Metabolism	Sensitivity	MR Egger	-	-	-	-	-	-	-	-	14	0.87 (0.73-1.04)	0.15005	-	-	-	-	-	-	-
	N-acetylkynurenine (2)	48757	-	-	-	-	Amino Acids	Tryptophan Metabolism	Sensitivity	Weighted median	-	-	-	-	-	-	-	-	14	0.9 (0.81-1.01)	0.071915	-	-	-	-	-	-	-
	N-acetylkynurenine (2)	48757	-	-	-	-	Amino Acids	Tryptophan Metabolism	Sensitivity	Weighted mode	-	-	-	-	-	-	-	-	14	0.91 (0.81-1.01)	0.110288	-	-	-	-	-	-	-
	N-acetylleucine	1587	HMDB11756	70912	C02710	CC(C)C[C@H](NC(C)=O)C(O)=O	Amino Acids	Leucine, Isoleucine and Valine Metabolism	Primary	Inverse variance weighted (random effects)/ Wald ratio	-	-	-	-	-	-	-	-	27	0.93 (0.87-1)	0.0500643	0.313694	-	-	-	-	-	-
	N-acetylleucine	1587	HMDB11756	70912	C02710	CC(C)C[C@H](NC(C)=O)C(O)=O	Amino Acids	Leucine, Isoleucine and Valine Metabolism	Sensitivity	Inverse variance weighted (fixed effects)	-	-	-	-	-	-	-	-	27	0.93 (0.87-1)	0.039878	-	-	-	-	-	-	-
	N-acetylleucine	1587	HMDB11756	70912	C02710	CC(C)C[C@H](NC(C)=O)C(O)=O	Amino Acids	Leucine, Isoleucine and Valine Metabolism	Sensitivity	Inverse variance weighted (multiplicative random effects)	-	-	-	-	-	-	-	-	27	0.93 (0.87-1)	0.0500643	-	-	-	-	-	-	-
	N-acetylleucine	1587	HMDB11756	70912	C02710	CC(C)C[C@H](NC(C)=O)C(O)=O	Amino Acids	Leucine, Isoleucine and Valine Metabolism	Sensitivity	MR Egger	-	-	-	-	-	-	-	-	27	0.89 (0.78-1.02)	0.107129	-	-	-	-	-	-	-
	N-acetylleucine	1587	HMDB11756	70912	C02710	CC(C)C[C@H](NC(C)=O)C(O)=O	Amino Acids	Leucine, Isoleucine and Valine Metabolism	Sensitivity	Weighted median	-	-	-	-	-	-	-	-	27	0.92 (0.84-1.01)	0.085773	-	-	-	-	-	-	-
	N-acetylleucine	1587	HMDB11756	70912	C02710	CC(C)C[C@H](NC(C)=O)C(O)=O	Amino Acids	Leucine, Isoleucine and Valine Metabolism	Sensitivity	Weighted mode	-	-	-	-	-	-	-	-	27	0.93 (0.85-1.01)	0.0973245	-	-	-	-	-	-	-
	N-acetylmethionine	1589	HMDB11745	448580	C02712	CSCC[C@H](NC(C)=O)C(O)=O	Amino Acids	Methionine, Cysteine, SAM and Taurine Metabolism	Primary	Inverse variance weighted (random effects)/ Wald ratio	-	-	-	-	-	-	-	-	1	0.81 (0.34-1.91)	0.624209	0.994872	-	-	-	-	-	-
	N-acetylneuraminate	32377	HMDB00230	439197	C00270	[H][C@]1(O[C@@](O)(C[C@H](O)[C@H]1NC(C)=O)C(O)=O)[C@H](O)[C@H](O)CO	Carbohydrates	Aminosugar Metabolism	Primary	Inverse variance weighted (random effects)/ Wald ratio	-	-	-	-	-	-	-	-	1	1.37 (0.87-2.13)	0.171109	0.656583	-	-	-	-	-	-
	N-acetylphenylalanine	33950	HMDB00512	74839	C03519	CC(=O)N[C@@H](CC1=CC=CC=C1)C(O)=O	Amino Acids	Phenylalanine Metabolism	Primary	Inverse variance weighted (random effects)/ Wald ratio	3	0.98 (0.93-1.04)	0.560188	0.863348	-	-	-	-	25	0.89 (0.82-0.97)	0.00654967	0.087624	2	0.95 (0.91-1)	0.0454271	0.195479	73.1822	0.0534795
	N-acetylphenylalanine	33950	HMDB00512	74839	C03519	CC(=O)N[C@@H](CC1=CC=CC=C1)C(O)=O	Amino Acids	Phenylalanine Metabolism	Sensitivity	Inverse variance weighted (fixed effects)	3	0.98 (0.93-1.04)	0.560188	-	-	-	-	-	25	0.89 (0.83-0.95)	0.00050061	-	-	-	-	-	-	-
	N-acetylphenylalanine	33950	HMDB00512	74839	C03519	CC(=O)N[C@@H](CC1=CC=CC=C1)C(O)=O	Amino Acids	Phenylalanine Metabolism	Sensitivity	Inverse variance weighted (multiplicative random effects)	3	0.98 (0.95-1.02)	0.315917	-	-	-	-	-	25	0.89 (0.82-0.97)	0.00654967	-	-	-	-	-	-	-
	N-acetylphenylalanine	33950	HMDB00512	74839	C03519	CC(=O)N[C@@H](CC1=CC=CC=C1)C(O)=O	Amino Acids	Phenylalanine Metabolism	Sensitivity	MR Egger	3	0.95 (0.85-1.06)	0.521348	-	-	-	-	-	25	0.87 (0.73-1.03)	0.124603	-	-	-	-	-	-	-
	N-acetylphenylalanine	33950	HMDB00512	74839	C03519	CC(=O)N[C@@H](CC1=CC=CC=C1)C(O)=O	Amino Acids	Phenylalanine Metabolism	Sensitivity	Weighted median	3	0.98 (0.92-1.04)	0.492615	-	-	-	-	-	25	0.92 (0.84-1.01)	0.0686529	-	-	-	-	-	-	-
	N-acetylphenylalanine	33950	HMDB00512	74839	C03519	CC(=O)N[C@@H](CC1=CC=CC=C1)C(O)=O	Amino Acids	Phenylalanine Metabolism	Sensitivity	Weighted mode	3	0.97 (0.91-1.04)	0.514075	-	-	-	-	-	25	0.92 (0.84-1.01)	0.0769793	-	-	-	-	-	-	-
	N-acetylputrescine	37496	HMDB02064	122356	C02714	CC(=O)NCCCCN	Amino Acids	Polyamine Metabolism	Primary	Inverse variance weighted (random effects)/ Wald ratio	-	-	-	-	-	-	-	-	6	1.16 (1.03-1.31)	0.0158326	0.147151	-	-	-	-	-	-
	N-acetylputrescine	37496	HMDB02064	122356	C02714	CC(=O)NCCCCN	Amino Acids	Polyamine Metabolism	Sensitivity	Inverse variance weighted (fixed effects)	-	-	-	-	-	-	-	-	6	1.16 (1.06-1.27)	0.00111786	-	-	-	-	-	-	-
	N-acetylputrescine	37496	HMDB02064	122356	C02714	CC(=O)NCCCCN	Amino Acids	Polyamine Metabolism	Sensitivity	Inverse variance weighted (multiplicative random effects)	-	-	-	-	-	-	-	-	6	1.16 (1.03-1.31)	0.0158326	-	-	-	-	-	-	-
	N-acetylputrescine	37496	HMDB02064	122356	C02714	CC(=O)NCCCCN	Amino Acids	Polyamine Metabolism	Sensitivity	MR Egger	-	-	-	-	-	-	-	-	6	1 (0.75-1.33)	0.998137	-	-	-	-	-	-	-
	N-acetylputrescine	37496	HMDB02064	122356	C02714	CC(=O)NCCCCN	Amino Acids	Polyamine Metabolism	Sensitivity	Weighted median	-	-	-	-	-	-	-	-	6	1.08 (0.97-1.2)	0.180896	-	-	-	-	-	-	-
	N-acetylputrescine	37496	HMDB02064	122356	C02714	CC(=O)NCCCCN	Amino Acids	Polyamine Metabolism	Sensitivity	Weighted mode	-	-	-	-	-	-	-	-	6	1.08 (0.97-1.21)	0.233417	-	-	-	-	-	-	-
	N-acetyltaurine	48187	HMDB0240253	159864	-	CC(=O)NCCS(O)(=O)=O	Amino Acids	Methionine, Cysteine, SAM and Taurine Metabolism	Primary	Inverse variance weighted (random effects)/ Wald ratio	-	-	-	-	-	-	-	-	5	0.97 (0.78-1.21)	0.811518	0.994872	-	-	-	-	-	-
	N-acetyltaurine	48187	HMDB0240253	159864	-	CC(=O)NCCS(O)(=O)=O	Amino Acids	Methionine, Cysteine, SAM and Taurine Metabolism	Sensitivity	Inverse variance weighted (fixed effects)	-	-	-	-	-	-	-	-	5	0.97 (0.83-1.14)	0.741882	-	-	-	-	-	-	-
	N-acetyltaurine	48187	HMDB0240253	159864	-	CC(=O)NCCS(O)(=O)=O	Amino Acids	Methionine, Cysteine, SAM and Taurine Metabolism	Sensitivity	Inverse variance weighted (multiplicative random effects)	-	-	-	-	-	-	-	-	5	0.97 (0.78-1.21)	0.811518	-	-	-	-	-	-	-
	N-acetyltaurine	48187	HMDB0240253	159864	-	CC(=O)NCCS(O)(=O)=O	Amino Acids	Methionine, Cysteine, SAM and Taurine Metabolism	Sensitivity	MR Egger	-	-	-	-	-	-	-	-	5	0.96 (0.42-2.17)	0.92623	-	-	-	-	-	-	-
	N-acetyltaurine	48187	HMDB0240253	159864	-	CC(=O)NCCS(O)(=O)=O	Amino Acids	Methionine, Cysteine, SAM and Taurine Metabolism	Sensitivity	Weighted median	-	-	-	-	-	-	-	-	5	0.99 (0.81-1.2)	0.897947	-	-	-	-	-	-	-
	N-acetyltaurine	48187	HMDB0240253	159864	-	CC(=O)NCCS(O)(=O)=O	Amino Acids	Methionine, Cysteine, SAM and Taurine Metabolism	Sensitivity	Weighted mode	-	-	-	-	-	-	-	-	5	0.99 (0.79-1.24)	0.949472	-	-	-	-	-	-	-
	N-acetylthreonine	33939	HMDB0062557	152204	-	C[C@@H](O)[C@H](NC(C)=O)C(O)=O	Amino Acids	Glycine, Serine and Threonine Metabolism	Primary	Inverse variance weighted (random effects)/ Wald ratio	1	1.04 (0.91-1.18)	0.587767	0.870677	1	0.97 (0.91-1.03)	0.348183	0.648316	-	-	-	-	2	0.98 (0.93-1.04)	0.537719	0.829277	0	0.372867
	N-acetyltryptophan	33959	HMDB13713	700653	C03137	CC(=O)N[C@@H](CC1=CNC2=C1C=CC=C2)C(O)=O	Amino Acids	Tryptophan Metabolism	Primary	Inverse variance weighted (random effects)/ Wald ratio	-	-	-	-	-	-	-	-	13	0.98 (0.86-1.12)	0.76513	0.994872	-	-	-	-	-	-
	N-acetyltryptophan	33959	HMDB13713	700653	C03137	CC(=O)N[C@@H](CC1=CNC2=C1C=CC=C2)C(O)=O	Amino Acids	Tryptophan Metabolism	Sensitivity	Inverse variance weighted (fixed effects)	-	-	-	-	-	-	-	-	13	0.98 (0.9-1.06)	0.624601	-	-	-	-	-	-	-
	N-acetyltryptophan	33959	HMDB13713	700653	C03137	CC(=O)N[C@@H](CC1=CNC2=C1C=CC=C2)C(O)=O	Amino Acids	Tryptophan Metabolism	Sensitivity	Inverse variance weighted (multiplicative random effects)	-	-	-	-	-	-	-	-	13	0.98 (0.86-1.12)	0.76513	-	-	-	-	-	-	-
	N-acetyltryptophan	33959	HMDB13713	700653	C03137	CC(=O)N[C@@H](CC1=CNC2=C1C=CC=C2)C(O)=O	Amino Acids	Tryptophan Metabolism	Sensitivity	MR Egger	-	-	-	-	-	-	-	-	13	0.87 (0.61-1.23)	0.441235	-	-	-	-	-	-	-
	N-acetyltryptophan	33959	HMDB13713	700653	C03137	CC(=O)N[C@@H](CC1=CNC2=C1C=CC=C2)C(O)=O	Amino Acids	Tryptophan Metabolism	Sensitivity	Weighted median	-	-	-	-	-	-	-	-	13	1.05 (0.93-1.18)	0.429647	-	-	-	-	-	-	-
	N-acetyltryptophan	33959	HMDB13713	700653	C03137	CC(=O)N[C@@H](CC1=CNC2=C1C=CC=C2)C(O)=O	Amino Acids	Tryptophan Metabolism	Sensitivity	Weighted mode	-	-	-	-	-	-	-	-	13	1.06 (0.93-1.2)	0.4066	-	-	-	-	-	-	-
	N-acetyltyrosine	32390	HMDB00866	68310	C01657	CC(=O)N[C@@H](CC1=CC=C(O)C=C1)C(O)=O	Amino Acids	Tyrosine Metabolism	Primary	Inverse variance weighted (random effects)/ Wald ratio	-	-	-	-	-	-	-	-	23	0.92 (0.86-0.98)	0.0159733	0.147151	-	-	-	-	-	-
	N-acetyltyrosine	32390	HMDB00866	68310	C01657	CC(=O)N[C@@H](CC1=CC=C(O)C=C1)C(O)=O	Amino Acids	Tyrosine Metabolism	Sensitivity	Inverse variance weighted (fixed effects)	-	-	-	-	-	-	-	-	23	0.92 (0.86-0.98)	0.0159733	-	-	-	-	-	-	-
	N-acetyltyrosine	32390	HMDB00866	68310	C01657	CC(=O)N[C@@H](CC1=CC=C(O)C=C1)C(O)=O	Amino Acids	Tyrosine Metabolism	Sensitivity	Inverse variance weighted (multiplicative random effects)	-	-	-	-	-	-	-	-	23	0.92 (0.87-0.98)	0.00591368	-	-	-	-	-	-	-
	N-acetyltyrosine	32390	HMDB00866	68310	C01657	CC(=O)N[C@@H](CC1=CC=C(O)C=C1)C(O)=O	Amino Acids	Tyrosine Metabolism	Sensitivity	MR Egger	-	-	-	-	-	-	-	-	23	0.9 (0.77-1.05)	0.18652	-	-	-	-	-	-	-
	N-acetyltyrosine	32390	HMDB00866	68310	C01657	CC(=O)N[C@@H](CC1=CC=C(O)C=C1)C(O)=O	Amino Acids	Tyrosine Metabolism	Sensitivity	Weighted median	-	-	-	-	-	-	-	-	23	0.92 (0.84-1.01)	0.0699737	-	-	-	-	-	-	-
	N-acetyltyrosine	32390	HMDB00866	68310	C01657	CC(=O)N[C@@H](CC1=CC=C(O)C=C1)C(O)=O	Amino Acids	Tyrosine Metabolism	Sensitivity	Weighted mode	-	-	-	-	-	-	-	-	23	0.91 (0.84-1)	0.0531144	-	-	-	-	-	-	-
	N-delta-acetylornithine	43249	HMDB0240589	9920500	-	CC(=O)NCCC[C@H](N)C(O)=O	Amino Acids	Urea cycle; Arginine and Proline Metabolism	Primary	Inverse variance weighted (random effects)/ Wald ratio	-	-	-	-	-	-	-	-	38	1.07 (1.01-1.13)	0.0154527	0.147151	-	-	-	-	-	-
	N-delta-acetylornithine	43249	HMDB0240589	9920500	-	CC(=O)NCCC[C@H](N)C(O)=O	Amino Acids	Urea cycle; Arginine and Proline Metabolism	Sensitivity	Inverse variance weighted (fixed effects)	-	-	-	-	-	-	-	-	38	1.07 (1.01-1.13)	0.0154527	-	-	-	-	-	-	-
	N-delta-acetylornithine	43249	HMDB0240589	9920500	-	CC(=O)NCCC[C@H](N)C(O)=O	Amino Acids	Urea cycle; Arginine and Proline Metabolism	Sensitivity	Inverse variance weighted (multiplicative random effects)	-	-	-	-	-	-	-	-	38	1.07 (1.02-1.12)	0.0084263	-	-	-	-	-	-	-
	N-delta-acetylornithine	43249	HMDB0240589	9920500	-	CC(=O)NCCC[C@H](N)C(O)=O	Amino Acids	Urea cycle; Arginine and Proline Metabolism	Sensitivity	MR Egger	-	-	-	-	-	-	-	-	38	1.07 (0.96-1.18)	0.223052	-	-	-	-	-	-	-
	N-delta-acetylornithine	43249	HMDB0240589	9920500	-	CC(=O)NCCC[C@H](N)C(O)=O	Amino Acids	Urea cycle; Arginine and Proline Metabolism	Sensitivity	Weighted median	-	-	-	-	-	-	-	-	38	1.06 (0.98-1.13)	0.144925	-	-	-	-	-	-	-
	N-delta-acetylornithine	43249	HMDB0240589	9920500	-	CC(=O)NCCC[C@H](N)C(O)=O	Amino Acids	Urea cycle; Arginine and Proline Metabolism	Sensitivity	Weighted mode	-	-	-	-	-	-	-	-	38	1.06 (0.99-1.14)	0.0987877	-	-	-	-	-	-	-
	N-formylanthranilic acid	43549	HMDB04089	101399	C05653	OC(=O)C1=CC=CC=C1NC=O	Amino Acids	Tryptophan Metabolism	Primary	Inverse variance weighted (random effects)/ Wald ratio	-	-	-	-	-	-	-	-	5	1 (0.86-1.15)	0.981523	0.999026	-	-	-	-	-	-
	N-formylanthranilic acid	43549	HMDB04089	101399	C05653	OC(=O)C1=CC=CC=C1NC=O	Amino Acids	Tryptophan Metabolism	Sensitivity	Inverse variance weighted (fixed effects)	-	-	-	-	-	-	-	-	5	1 (0.88-1.13)	0.978818	-	-	-	-	-	-	-
	N-formylanthranilic acid	43549	HMDB04089	101399	C05653	OC(=O)C1=CC=CC=C1NC=O	Amino Acids	Tryptophan Metabolism	Sensitivity	Inverse variance weighted (multiplicative random effects)	-	-	-	-	-	-	-	-	5	1 (0.86-1.15)	0.981523	-	-	-	-	-	-	-
	N-formylanthranilic acid	43549	HMDB04089	101399	C05653	OC(=O)C1=CC=CC=C1NC=O	Amino Acids	Tryptophan Metabolism	Sensitivity	MR Egger	-	-	-	-	-	-	-	-	5	1.26 (0.99-1.6)	0.157522	-	-	-	-	-	-	-
	N-formylanthranilic acid	43549	HMDB04089	101399	C05653	OC(=O)C1=CC=CC=C1NC=O	Amino Acids	Tryptophan Metabolism	Sensitivity	Weighted median	-	-	-	-	-	-	-	-	5	1.02 (0.88-1.19)	0.757856	-	-	-	-	-	-	-
	N-formylanthranilic acid	43549	HMDB04089	101399	C05653	OC(=O)C1=CC=CC=C1NC=O	Amino Acids	Tryptophan Metabolism	Sensitivity	Weighted mode	-	-	-	-	-	-	-	-	5	1.07 (0.9-1.27)	0.485814	-	-	-	-	-	-	-
	N-formylmethionine	2829	HMDB01015	439750	C03145	CSCC[C@H](NC=O)C(O)=O	Amino Acids	Methionine, Cysteine, SAM and Taurine Metabolism	Primary	Inverse variance weighted (random effects)/ Wald ratio	-	-	-	-	-	-	-	-	1	1.11 (0.86-1.43)	0.422891	0.987241	-	-	-	-	-	-
	N-formylphenylalanine	48433	HMDB0240317	759256	-	OC(=O)[C@H](CC1=CC=CC=C1)NC=O	Amino Acids	Tyrosine Metabolism	Primary	Inverse variance weighted (random effects)/ Wald ratio	-	-	-	-	-	-	-	-	1	1.02 (0.55-1.9)	0.941766	0.999021	-	-	-	-	-	-
	N-methylpipecolate	47101	-	11286529	-	-	Xenobiotics	Chemical	Primary	Inverse variance weighted (random effects)/ Wald ratio	-	-	-	-	-	-	-	-	22	0.94 (0.89-0.99)	0.0163501	0.147151	-	-	-	-	-	-
	N-methylpipecolate	47101	-	11286529	-	-	Xenobiotics	Chemical	Sensitivity	Inverse variance weighted (fixed effects)	-	-	-	-	-	-	-	-	22	0.94 (0.89-0.99)	0.0163501	-	-	-	-	-	-	-
	N-methylpipecolate	47101	-	11286529	-	-	Xenobiotics	Chemical	Sensitivity	Inverse variance weighted (multiplicative random effects)	-	-	-	-	-	-	-	-	22	0.94 (0.9-0.97)	0.00126835	-	-	-	-	-	-	-
	N-methylpipecolate	47101	-	11286529	-	-	Xenobiotics	Chemical	Sensitivity	MR Egger	-	-	-	-	-	-	-	-	22	0.95 (0.86-1.04)	0.27016	-	-	-	-	-	-	-
	N-methylpipecolate	47101	-	11286529	-	-	Xenobiotics	Chemical	Sensitivity	Weighted median	-	-	-	-	-	-	-	-	22	0.94 (0.88-1.01)	0.0801882	-	-	-	-	-	-	-
	N-methylpipecolate	47101	-	11286529	-	-	Xenobiotics	Chemical	Sensitivity	Weighted mode	-	-	-	-	-	-	-	-	22	0.94 (0.88-1.01)	0.114794	-	-	-	-	-	-	-
	N-oleoylserine	57664	-	-	-	-	Lipids	Endocannabinoid	Primary	Inverse variance weighted (random effects)/ Wald ratio	-	-	-	-	-	-	-	-	1	0.99 (0.75-1.3)	0.937691	0.999021	-	-	-	-	-	-
	N-oleoyltaurine	39732	-	6437033	-	-	Lipids	Endocannabinoid	Primary	Inverse variance weighted (random effects)/ Wald ratio	-	-	-	-	-	-	-	-	2	1.04 (0.88-1.22)	0.656952	0.994872	-	-	-	-	-	-
	N-oleoyltaurine	39732	-	6437033	-	-	Lipids	Endocannabinoid	Sensitivity	Inverse variance weighted (fixed effects)	-	-	-	-	-	-	-	-	2	1.04 (0.88-1.22)	0.656952	-	-	-	-	-	-	-
	N-oleoyltaurine	39732	-	6437033	-	-	Lipids	Endocannabinoid	Sensitivity	Inverse variance weighted (multiplicative random effects)	-	-	-	-	-	-	-	-	2	1.04 (0.92-1.17)	0.550975	-	-	-	-	-	-	-
	N-palmitoylglycine	42092	HMDB13034	151008	-	CCCCCCCCCCCCCCCC(=O)NCC(O)=O	Lipids	Fatty Acid Metabolism (Acyl Carnitine)	Primary	Inverse variance weighted (random effects)/ Wald ratio	-	-	-	-	-	-	-	-	14	0.98 (0.92-1.06)	0.638297	0.994872	-	-	-	-	-	-
	N-palmitoylglycine	42092	HMDB13034	151008	-	CCCCCCCCCCCCCCCC(=O)NCC(O)=O	Lipids	Fatty Acid Metabolism (Acyl Carnitine)	Sensitivity	Inverse variance weighted (fixed effects)	-	-	-	-	-	-	-	-	14	0.98 (0.92-1.06)	0.638297	-	-	-	-	-	-	-
	N-palmitoylglycine	42092	HMDB13034	151008	-	CCCCCCCCCCCCCCCC(=O)NCC(O)=O	Lipids	Fatty Acid Metabolism (Acyl Carnitine)	Sensitivity	Inverse variance weighted (multiplicative random effects)	-	-	-	-	-	-	-	-	14	0.98 (0.92-1.05)	0.604307	-	-	-	-	-	-	-
	N-palmitoylglycine	42092	HMDB13034	151008	-	CCCCCCCCCCCCCCCC(=O)NCC(O)=O	Lipids	Fatty Acid Metabolism (Acyl Carnitine)	Sensitivity	MR Egger	-	-	-	-	-	-	-	-	14	1.02 (0.86-1.2)	0.8164	-	-	-	-	-	-	-
	N-palmitoylglycine	42092	HMDB13034	151008	-	CCCCCCCCCCCCCCCC(=O)NCC(O)=O	Lipids	Fatty Acid Metabolism (Acyl Carnitine)	Sensitivity	Weighted median	-	-	-	-	-	-	-	-	14	0.99 (0.9-1.09)	0.831726	-	-	-	-	-	-	-
	N-palmitoylglycine	42092	HMDB13034	151008	-	CCCCCCCCCCCCCCCC(=O)NCC(O)=O	Lipids	Fatty Acid Metabolism (Acyl Carnitine)	Sensitivity	Weighted mode	-	-	-	-	-	-	-	-	14	0.99 (0.9-1.08)	0.770684	-	-	-	-	-	-	-
	N-stearoyl-sphingosine (d18:1/18:0)*	54979	HMDB04950	5283565	C00195	[H][C@@](CO)(NC(=O)CCCCCCCCCCCCCCCCC)[C@H](O)\C=C\CCCCCCCCCCCCC	Lipids	Ceramides	Primary	Inverse variance weighted (random effects)/ Wald ratio	-	-	-	-	-	-	-	-	2	0.83 (0.53-1.3)	0.422176	0.987241	-	-	-	-	-	-
	N-stearoyl-sphingosine (d18:1/18:0)*	54979	HMDB04950	5283565	C00195	[H][C@@](CO)(NC(=O)CCCCCCCCCCCCCCCCC)[C@H](O)\C=C\CCCCCCCCCCCCC	Lipids	Ceramides	Sensitivity	Inverse variance weighted (fixed effects)	-	-	-	-	-	-	-	-	2	0.83 (0.61-1.14)	0.258109	-	-	-	-	-	-	-
	N-stearoyl-sphingosine (d18:1/18:0)*	54979	HMDB04950	5283565	C00195	[H][C@@](CO)(NC(=O)CCCCCCCCCCCCCCCCC)[C@H](O)\C=C\CCCCCCCCCCCCC	Lipids	Ceramides	Sensitivity	Inverse variance weighted (multiplicative random effects)	-	-	-	-	-	-	-	-	2	0.83 (0.53-1.3)	0.422176	-	-	-	-	-	-	-
	N-trimethyl 5-aminovalerate	-	-	-	-	-	Amino Acids	Lysine Metabolism	Primary	Inverse variance weighted (random effects)/ Wald ratio	-	-	-	-	-	-	-	-	2	0.91 (0.67-1.23)	0.543062	0.994872	-	-	-	-	-	-
	N-trimethyl 5-aminovalerate	-	-	-	-	-	Amino Acids	Lysine Metabolism	Sensitivity	Inverse variance weighted (fixed effects)	-	-	-	-	-	-	-	-	2	0.91 (0.7-1.18)	0.484848	-	-	-	-	-	-	-
	N-trimethyl 5-aminovalerate	-	-	-	-	-	Amino Acids	Lysine Metabolism	Sensitivity	Inverse variance weighted (multiplicative random effects)	-	-	-	-	-	-	-	-	2	0.91 (0.67-1.23)	0.543062	-	-	-	-	-	-	-
	N1,N12-diacetylspermine	-	HMDB02172	132680	C03413	CC(=O)NCCCNCCCCNCCCNC(C)=O	Amino Acids	Polyamine Metabolism	Primary	Inverse variance weighted (random effects)/ Wald ratio	-	-	-	-	-	-	-	-	2	0.8 (0.61-1.05)	0.110835	0.526474	-	-	-	-	-	-
	N1,N12-diacetylspermine	-	HMDB02172	132680	C03413	CC(=O)NCCCNCCCCNCCCNC(C)=O	Amino Acids	Polyamine Metabolism	Sensitivity	Inverse variance weighted (fixed effects)	-	-	-	-	-	-	-	-	2	0.8 (0.63-1.02)	0.0699031	-	-	-	-	-	-	-
	N1,N12-diacetylspermine	-	HMDB02172	132680	C03413	CC(=O)NCCCNCCCCNCCCNC(C)=O	Amino Acids	Polyamine Metabolism	Sensitivity	Inverse variance weighted (multiplicative random effects)	-	-	-	-	-	-	-	-	2	0.8 (0.61-1.05)	0.110835	-	-	-	-	-	-	-
	N1-Methyl-2-pyridone-5-carboxamide	40469	HMDB04193	69698	C05842	CN1C=C(C=CC1=O)C(N)=O	Cofactors and Vitamins	Nicotinate and Nicotinamide Metabolism	Primary	Inverse variance weighted (random effects)/ Wald ratio	-	-	-	-	-	-	-	-	1	1.4 (0.86-2.29)	0.180702	0.677633	-	-	-	-	-	-
	N1-methyladenosine	15650	HMDB03331	27476	C02494	CN1C=NC2=C(N=CN2[C@@H]2O[C@H](CO)[C@@H](O)[C@H]2O)C1=N	Nucleotides	Purine Metabolism, Adenine containing	Primary	Inverse variance weighted (random effects)/ Wald ratio	1	1.02 (0.93-1.11)	0.720176	0.878415	1	1.01 (0.95-1.06)	0.842976	0.95162	4	1.13 (0.96-1.32)	0.131089	0.584584	3	1.02 (0.97-1.06)	0.446581	0.78929	0	0.393033
	N1-methyladenosine	15650	HMDB03331	27476	C02494	CN1C=NC2=C(N=CN2[C@@H]2O[C@H](CO)[C@@H](O)[C@H]2O)C1=N	Nucleotides	Purine Metabolism, Adenine containing	Sensitivity	Inverse variance weighted (fixed effects)	-	-	-	-	-	-	-	-	4	1.13 (0.96-1.32)	0.131089	-	-	-	-	-	-	-
	N1-methyladenosine	15650	HMDB03331	27476	C02494	CN1C=NC2=C(N=CN2[C@@H]2O[C@H](CO)[C@@H](O)[C@H]2O)C1=N	Nucleotides	Purine Metabolism, Adenine containing	Sensitivity	Inverse variance weighted (multiplicative random effects)	-	-	-	-	-	-	-	-	4	1.13 (0.99-1.28)	0.0628585	-	-	-	-	-	-	-
	N1-methyladenosine	15650	HMDB03331	27476	C02494	CN1C=NC2=C(N=CN2[C@@H]2O[C@H](CO)[C@@H](O)[C@H]2O)C1=N	Nucleotides	Purine Metabolism, Adenine containing	Sensitivity	MR Egger	-	-	-	-	-	-	-	-	4	0.85 (0.45-1.6)	0.660215	-	-	-	-	-	-	-
	N1-methyladenosine	15650	HMDB03331	27476	C02494	CN1C=NC2=C(N=CN2[C@@H]2O[C@H](CO)[C@@H](O)[C@H]2O)C1=N	Nucleotides	Purine Metabolism, Adenine containing	Sensitivity	Weighted median	-	-	-	-	-	-	-	-	4	1.09 (0.91-1.29)	0.348858	-	-	-	-	-	-	-
	N1-methyladenosine	15650	HMDB03331	27476	C02494	CN1C=NC2=C(N=CN2[C@@H]2O[C@H](CO)[C@@H](O)[C@H]2O)C1=N	Nucleotides	Purine Metabolism, Adenine containing	Sensitivity	Weighted mode	-	-	-	-	-	-	-	-	4	1.08 (0.88-1.32)	0.525191	-	-	-	-	-	-	-
	N2,N5-diacetylornithine	43591	-	10398396	-	-	Amino Acids	Urea cycle; Arginine and Proline Metabolism	Primary	Inverse variance weighted (random effects)/ Wald ratio	-	-	-	-	-	-	-	-	3	0.85 (0.72-1.01)	0.0573932	0.346459	-	-	-	-	-	-
	N2,N5-diacetylornithine	43591	-	10398396	-	-	Amino Acids	Urea cycle; Arginine and Proline Metabolism	Sensitivity	Inverse variance weighted (fixed effects)	-	-	-	-	-	-	-	-	3	0.85 (0.72-1.01)	0.0573932	-	-	-	-	-	-	-
	N2,N5-diacetylornithine	43591	-	10398396	-	-	Amino Acids	Urea cycle; Arginine and Proline Metabolism	Sensitivity	Inverse variance weighted (multiplicative random effects)	-	-	-	-	-	-	-	-	3	0.85 (0.84-0.86)	1.32797e-100	-	-	-	-	-	-	-
	N2,N5-diacetylornithine	43591	-	10398396	-	-	Amino Acids	Urea cycle; Arginine and Proline Metabolism	Sensitivity	MR Egger	-	-	-	-	-	-	-	-	3	0.78 (0.18-3.39)	0.795275	-	-	-	-	-	-	-
	N2,N5-diacetylornithine	43591	-	10398396	-	-	Amino Acids	Urea cycle; Arginine and Proline Metabolism	Sensitivity	Weighted median	-	-	-	-	-	-	-	-	3	0.85 (0.71-1.01)	0.0702254	-	-	-	-	-	-	-
	N2,N5-diacetylornithine	43591	-	10398396	-	-	Amino Acids	Urea cycle; Arginine and Proline Metabolism	Sensitivity	Weighted mode	-	-	-	-	-	-	-	-	3	0.85 (0.7-1.02)	0.228594	-	-	-	-	-	-	-
	N2-acetyllysine	36751	HMDB00446	92907	C12989	CC(=O)N[C@@H](CCCCN)C(O)=O	Amino Acids	Lysine Metabolism	Primary	Inverse variance weighted (random effects)/ Wald ratio	-	-	-	-	-	-	-	-	20	0.93 (0.88-0.99)	0.0212191	0.164116	-	-	-	-	-	-
	N2-acetyllysine	36751	HMDB00446	92907	C12989	CC(=O)N[C@@H](CCCCN)C(O)=O	Amino Acids	Lysine Metabolism	Sensitivity	Inverse variance weighted (fixed effects)	-	-	-	-	-	-	-	-	20	0.93 (0.88-0.99)	0.0212191	-	-	-	-	-	-	-
	N2-acetyllysine	36751	HMDB00446	92907	C12989	CC(=O)N[C@@H](CCCCN)C(O)=O	Amino Acids	Lysine Metabolism	Sensitivity	Inverse variance weighted (multiplicative random effects)	-	-	-	-	-	-	-	-	20	0.93 (0.88-0.98)	0.0102937	-	-	-	-	-	-	-
	N2-acetyllysine	36751	HMDB00446	92907	C12989	CC(=O)N[C@@H](CCCCN)C(O)=O	Amino Acids	Lysine Metabolism	Sensitivity	MR Egger	-	-	-	-	-	-	-	-	20	0.97 (0.87-1.09)	0.667312	-	-	-	-	-	-	-
	N2-acetyllysine	36751	HMDB00446	92907	C12989	CC(=O)N[C@@H](CCCCN)C(O)=O	Amino Acids	Lysine Metabolism	Sensitivity	Weighted median	-	-	-	-	-	-	-	-	20	0.93 (0.87-1.01)	0.0675396	-	-	-	-	-	-	-
	N2-acetyllysine	36751	HMDB00446	92907	C12989	CC(=O)N[C@@H](CCCCN)C(O)=O	Amino Acids	Lysine Metabolism	Sensitivity	Weighted mode	-	-	-	-	-	-	-	-	20	0.93 (0.87-1.01)	0.0843422	-	-	-	-	-	-	-
	N4-acetylcytidine	35130	HMDB05923	107461	-	CC(=O)NC1=NC(=O)N(C=C1)[C@@H]1O[C@H](CO)[C@@H](O)[C@H]1O	Nucleotides	Pyrimidine Metabolism, Cytidine containing	Primary	Inverse variance weighted (random effects)/ Wald ratio	-	-	-	-	-	-	-	-	3	1.11 (0.76-1.62)	0.58157	0.994872	-	-	-	-	-	-
	N4-acetylcytidine	35130	HMDB05923	107461	-	CC(=O)NC1=NC(=O)N(C=C1)[C@@H]1O[C@H](CO)[C@@H](O)[C@H]1O	Nucleotides	Pyrimidine Metabolism, Cytidine containing	Sensitivity	Inverse variance weighted (fixed effects)	-	-	-	-	-	-	-	-	3	1.11 (0.83-1.49)	0.475168	-	-	-	-	-	-	-
	N4-acetylcytidine	35130	HMDB05923	107461	-	CC(=O)NC1=NC(=O)N(C=C1)[C@@H]1O[C@H](CO)[C@@H](O)[C@H]1O	Nucleotides	Pyrimidine Metabolism, Cytidine containing	Sensitivity	Inverse variance weighted (multiplicative random effects)	-	-	-	-	-	-	-	-	3	1.11 (0.76-1.62)	0.58157	-	-	-	-	-	-	-
	N4-acetylcytidine	35130	HMDB05923	107461	-	CC(=O)NC1=NC(=O)N(C=C1)[C@@H]1O[C@H](CO)[C@@H](O)[C@H]1O	Nucleotides	Pyrimidine Metabolism, Cytidine containing	Sensitivity	MR Egger	-	-	-	-	-	-	-	-	3	2.06 (0.34-12.52)	0.575789	-	-	-	-	-	-	-
	N4-acetylcytidine	35130	HMDB05923	107461	-	CC(=O)NC1=NC(=O)N(C=C1)[C@@H]1O[C@H](CO)[C@@H](O)[C@H]1O	Nucleotides	Pyrimidine Metabolism, Cytidine containing	Sensitivity	Weighted median	-	-	-	-	-	-	-	-	3	1.06 (0.75-1.5)	0.734148	-	-	-	-	-	-	-
	N4-acetylcytidine	35130	HMDB05923	107461	-	CC(=O)NC1=NC(=O)N(C=C1)[C@@H]1O[C@H](CO)[C@@H](O)[C@H]1O	Nucleotides	Pyrimidine Metabolism, Cytidine containing	Sensitivity	Weighted mode	-	-	-	-	-	-	-	-	3	1.03 (0.71-1.51)	0.875	-	-	-	-	-	-	-
	N6,N6,N6-trimethyllysine	1498	HMDB01325	440120	C03793	C[N+](C)(C)CCCC[C@H](N)C([O-])=O	Amino Acids	Lysine Metabolism	Primary	Inverse variance weighted (random effects)/ Wald ratio	-	-	-	-	-	-	-	-	2	1.32 (0.94-1.87)	0.111676	0.526474	-	-	-	-	-	-
	N6,N6,N6-trimethyllysine	1498	HMDB01325	440120	C03793	C[N+](C)(C)CCCC[C@H](N)C([O-])=O	Amino Acids	Lysine Metabolism	Sensitivity	Inverse variance weighted (fixed effects)	-	-	-	-	-	-	-	-	2	1.32 (0.94-1.87)	0.111676	-	-	-	-	-	-	-
	N6,N6,N6-trimethyllysine	1498	HMDB01325	440120	C03793	C[N+](C)(C)CCCC[C@H](N)C([O-])=O	Amino Acids	Lysine Metabolism	Sensitivity	Inverse variance weighted (multiplicative random effects)	-	-	-	-	-	-	-	-	2	1.32 (1.28-1.37)	5.96829e-59	-	-	-	-	-	-	-
	N6-acetyllysine	36752	HMDB00206	92832	C02727	OC(=O)CC1=CNC2=C1C=CC=C2	Amino Acids	Lysine Metabolism	Primary	Inverse variance weighted (random effects)/ Wald ratio	1	1.07 (0.93-1.23)	0.372129	0.863252	2	1.02 (0.92-1.14)	0.681445	0.891768	1	1.08 (0.87-1.34)	0.483649	0.987241	3	1.04 (0.96-1.13)	0.288688	0.640985	0	0.847942
	N6-acetyllysine	36752	HMDB00206	92832	C02727	OC(=O)CC1=CNC2=C1C=CC=C2	Amino Acids	Lysine Metabolism	Sensitivity	Inverse variance weighted (fixed effects)	-	-	-	-	2	1.02 (0.99-1.06)	0.182967	-	-	-	-	-	-	-	-	-	-	-
	N6-acetyllysine	36752	HMDB00206	92832	C02727	OC(=O)CC1=CNC2=C1C=CC=C2	Amino Acids	Lysine Metabolism	Sensitivity	Inverse variance weighted (multiplicative random effects)	-	-	-	-	2	1.02 (0.92-1.14)	0.681445	-	-	-	-	-	-	-	-	-	-	-
	S-1-pyrroline-5-carboxylate	42370	HMDB01301	1196	C04322	OC(=O)[C@@H]1CCC=N1	Amino Acids	Glutamate Metabolism	Primary	Inverse variance weighted (random effects)/ Wald ratio	-	-	-	-	-	-	-	-	35	1.12 (1.06-1.18)	3.39e-05	0.00101329	-	-	-	-	-	-
	S-1-pyrroline-5-carboxylate	42370	HMDB01301	1196	C04322	OC(=O)[C@@H]1CCC=N1	Amino Acids	Glutamate Metabolism	Sensitivity	Inverse variance weighted (fixed effects)	-	-	-	-	-	-	-	-	35	1.12 (1.06-1.18)	3.39e-05	-	-	-	-	-	-	-
	S-1-pyrroline-5-carboxylate	42370	HMDB01301	1196	C04322	OC(=O)[C@@H]1CCC=N1	Amino Acids	Glutamate Metabolism	Sensitivity	Inverse variance weighted (multiplicative random effects)	-	-	-	-	-	-	-	-	35	1.12 (1.08-1.15)	3.06e-11	-	-	-	-	-	-	-
	S-1-pyrroline-5-carboxylate	42370	HMDB01301	1196	C04322	OC(=O)[C@@H]1CCC=N1	Amino Acids	Glutamate Metabolism	Sensitivity	MR Egger	-	-	-	-	-	-	-	-	35	1.07 (0.95-1.21)	0.250946	-	-	-	-	-	-	-
	S-1-pyrroline-5-carboxylate	42370	HMDB01301	1196	C04322	OC(=O)[C@@H]1CCC=N1	Amino Acids	Glutamate Metabolism	Sensitivity	Weighted median	-	-	-	-	-	-	-	-	35	1.1 (1.03-1.19)	0.00845102	-	-	-	-	-	-	-
	S-1-pyrroline-5-carboxylate	42370	HMDB01301	1196	C04322	OC(=O)[C@@H]1CCC=N1	Amino Acids	Glutamate Metabolism	Sensitivity	Weighted mode	-	-	-	-	-	-	-	-	35	1.1 (1.02-1.18)	0.0209118	-	-	-	-	-	-	-
	S-adenosylhomocysteine (SAH)	42382	HMDB00939	439155	C00021	N[C@@H](CCSC[C@H]1O[C@H]([C@H](O)[C@@H]1O)N1C=NC2=C1N=CN=C2N)C(O)=O	Amino Acids	Methionine, Cysteine, SAM and Taurine Metabolism	Primary	Inverse variance weighted (random effects)/ Wald ratio	-	-	-	-	-	-	-	-	1	0.96 (0.73-1.27)	0.800101	0.994872	-	-	-	-	-	-
	S-allylcysteine	43239	HMDB34323	98280	C16759	NC(CSCC=C)C(O)=O	Xenobiotics	Food Component/Plant	Primary	Inverse variance weighted (random effects)/ Wald ratio	-	-	-	-	-	-	-	-	3	1.01 (0.8-1.27)	0.949892	0.999021	-	-	-	-	-	-
	S-allylcysteine	43239	HMDB34323	98280	C16759	NC(CSCC=C)C(O)=O	Xenobiotics	Food Component/Plant	Sensitivity	Inverse variance weighted (fixed effects)	-	-	-	-	-	-	-	-	3	1.01 (0.8-1.27)	0.949892	-	-	-	-	-	-	-
	S-allylcysteine	43239	HMDB34323	98280	C16759	NC(CSCC=C)C(O)=O	Xenobiotics	Food Component/Plant	Sensitivity	Inverse variance weighted (multiplicative random effects)	-	-	-	-	-	-	-	-	3	1.01 (0.84-1.2)	0.935964	-	-	-	-	-	-	-
	S-allylcysteine	43239	HMDB34323	98280	C16759	NC(CSCC=C)C(O)=O	Xenobiotics	Food Component/Plant	Sensitivity	MR Egger	-	-	-	-	-	-	-	-	3	0.74 (0.37-1.47)	0.546532	-	-	-	-	-	-	-
	S-allylcysteine	43239	HMDB34323	98280	C16759	NC(CSCC=C)C(O)=O	Xenobiotics	Food Component/Plant	Sensitivity	Weighted median	-	-	-	-	-	-	-	-	3	0.96 (0.74-1.24)	0.730611	-	-	-	-	-	-	-
	S-allylcysteine	43239	HMDB34323	98280	C16759	NC(CSCC=C)C(O)=O	Xenobiotics	Food Component/Plant	Sensitivity	Weighted mode	-	-	-	-	-	-	-	-	3	0.9 (0.64-1.27)	0.611952	-	-	-	-	-	-	-
	S-methylcysteine	39592	HMDB02108	24417	C22040	CSC[C@@H](N)C(O)=O	Amino Acids	Methionine, Cysteine, SAM and Taurine Metabolism	Primary	Inverse variance weighted (random effects)/ Wald ratio	-	-	-	-	-	-	-	-	3	1.01 (0.84-1.23)	0.893561	0.997882	-	-	-	-	-	-
	S-methylcysteine	39592	HMDB02108	24417	C22040	CSC[C@@H](N)C(O)=O	Amino Acids	Methionine, Cysteine, SAM and Taurine Metabolism	Sensitivity	Inverse variance weighted (fixed effects)	-	-	-	-	-	-	-	-	3	1.01 (0.84-1.23)	0.893561	-	-	-	-	-	-	-
	S-methylcysteine	39592	HMDB02108	24417	C22040	CSC[C@@H](N)C(O)=O	Amino Acids	Methionine, Cysteine, SAM and Taurine Metabolism	Sensitivity	Inverse variance weighted (multiplicative random effects)	-	-	-	-	-	-	-	-	3	1.01 (0.89-1.15)	0.840984	-	-	-	-	-	-	-
	S-methylcysteine	39592	HMDB02108	24417	C22040	CSC[C@@H](N)C(O)=O	Amino Acids	Methionine, Cysteine, SAM and Taurine Metabolism	Sensitivity	MR Egger	-	-	-	-	-	-	-	-	3	1.95 (0.43-8.93)	0.546668	-	-	-	-	-	-	-
	S-methylcysteine	39592	HMDB02108	24417	C22040	CSC[C@@H](N)C(O)=O	Amino Acids	Methionine, Cysteine, SAM and Taurine Metabolism	Sensitivity	Weighted median	-	-	-	-	-	-	-	-	3	1.04 (0.84-1.29)	0.695884	-	-	-	-	-	-	-
	S-methylcysteine	39592	HMDB02108	24417	C22040	CSC[C@@H](N)C(O)=O	Amino Acids	Methionine, Cysteine, SAM and Taurine Metabolism	Sensitivity	Weighted mode	-	-	-	-	-	-	-	-	3	1.06 (0.83-1.36)	0.677033	-	-	-	-	-	-	-
	S-methylcysteine sulfoxide	43378	HMDB29432	82142	-	CS(=O)CC(N)C(O)=O	Amino Acids	Methionine, Cysteine, SAM and Taurine Metabolism	Primary	Inverse variance weighted (random effects)/ Wald ratio	-	-	-	-	-	-	-	-	1	0.83 (0.52-1.33)	0.450295	0.987241	-	-	-	-	-	-
	acesulfame	48569	HMDB33585	36573	-	CC1=CC(=O)NS(=O)(=O)O1	Xenobiotics	Food Component/Plant	Primary	Inverse variance weighted (random effects)/ Wald ratio	-	-	-	-	-	-	-	-	1	1.17 (0.85-1.61)	0.329459	0.893079	-	-	-	-	-	-
	acetaminophen sulfate	37475	HMDB0059911	83939	-	CC(=O)NC1=CC=C(OS(O)(=O)=O)C=C1	Xenobiotics	Drug	Primary	Inverse variance weighted (random effects)/ Wald ratio	-	-	-	-	-	-	-	-	1	1.17 (0.92-1.48)	0.195123	0.710262	-	-	-	-	-	-
	acetylcarnitine (C2)	32198	HMDB00201	1	C02571	CC(=O)O[C@H](CC(O)=O)C[N+](C)(C)C	Lipids	Fatty Acid Metabolism (Acyl Carnitine)	Primary	Inverse variance weighted (random effects)/ Wald ratio	1	0.97 (0.88-1.08)	0.60452	0.870677	-	-	-	-	2	0.96 (0.74-1.27)	0.793392	0.994872	2	0.97 (0.89-1.07)	0.564208	0.839901	0	0.947436
	acetylcarnitine (C2)	32198	HMDB00201	1	C02571	CC(=O)O[C@H](CC(O)=O)C[N+](C)(C)C	Lipids	Fatty Acid Metabolism (Acyl Carnitine)	Sensitivity	Inverse variance weighted (fixed effects)	-	-	-	-	-	-	-	-	2	0.96 (0.74-1.27)	0.793392	-	-	-	-	-	-	-
	acetylcarnitine (C2)	32198	HMDB00201	1	C02571	CC(=O)O[C@H](CC(O)=O)C[N+](C)(C)C	Lipids	Fatty Acid Metabolism (Acyl Carnitine)	Sensitivity	Inverse variance weighted (multiplicative random effects)	-	-	-	-	-	-	-	-	2	0.96 (0.89-1.05)	0.390346	-	-	-	-	-	-	-
	acisoga	43258	HMDB0061384	129397	-	CC(=O)NCCCN1CCCC1=O	Amino Acids	Polyamine Metabolism	Primary	Inverse variance weighted (random effects)/ Wald ratio	-	-	-	-	-	-	-	-	9	0.95 (0.82-1.09)	0.442669	0.987241	-	-	-	-	-	-
	acisoga	43258	HMDB0061384	129397	-	CC(=O)NCCCN1CCCC1=O	Amino Acids	Polyamine Metabolism	Sensitivity	Inverse variance weighted (fixed effects)	-	-	-	-	-	-	-	-	9	0.95 (0.83-1.08)	0.409425	-	-	-	-	-	-	-
	acisoga	43258	HMDB0061384	129397	-	CC(=O)NCCCN1CCCC1=O	Amino Acids	Polyamine Metabolism	Sensitivity	Inverse variance weighted (multiplicative random effects)	-	-	-	-	-	-	-	-	9	0.95 (0.82-1.09)	0.442669	-	-	-	-	-	-	-
	acisoga	43258	HMDB0061384	129397	-	CC(=O)NCCCN1CCCC1=O	Amino Acids	Polyamine Metabolism	Sensitivity	MR Egger	-	-	-	-	-	-	-	-	9	1.14 (0.47-2.77)	0.781123	-	-	-	-	-	-	-
	acisoga	43258	HMDB0061384	129397	-	CC(=O)NCCCN1CCCC1=O	Amino Acids	Polyamine Metabolism	Sensitivity	Weighted median	-	-	-	-	-	-	-	-	9	0.89 (0.75-1.06)	0.183355	-	-	-	-	-	-	-
	acisoga	43258	HMDB0061384	129397	-	CC(=O)NCCCN1CCCC1=O	Amino Acids	Polyamine Metabolism	Sensitivity	Weighted mode	-	-	-	-	-	-	-	-	9	0.88 (0.7-1.1)	0.303892	-	-	-	-	-	-	-
	aconitate [cis or trans]	46173	-	-	-	-	Energy	TCA Cycle	Primary	Inverse variance weighted (random effects)/ Wald ratio	-	-	-	-	-	-	-	-	1	0.9 (0.5-1.6)	0.709382	0.994872	-	-	-	-	-	-
	adenosine	555	HMDB00050	60961	C00212	NC1=C2N=CN([C@@H]3O[C@H](CO)[C@@H](O)[C@H]3O)C2=NC=N1	Nucleotides	Purine Metabolism, Adenine containing	Primary	Inverse variance weighted (random effects)/ Wald ratio	-	-	-	-	-	-	-	-	1	1.08 (0.86-1.37)	0.491513	0.987241	-	-	-	-	-	-
	adenosine 5'-monophosphate (AMP)	32342	HMDB00045	6083	C00020	NC1=C2N=CN([C@@H]3O[C@H](COP(O)(O)=O)[C@@H](O)[C@H]3O)C2=NC=N1	Nucleotides	Purine Metabolism, Adenine containing	Primary	Inverse variance weighted (random effects)/ Wald ratio	-	-	-	-	-	-	-	-	3	0.94 (0.75-1.18)	0.578913	0.994872	-	-	-	-	-	-
	adenosine 5'-monophosphate (AMP)	32342	HMDB00045	6083	C00020	NC1=C2N=CN([C@@H]3O[C@H](COP(O)(O)=O)[C@@H](O)[C@H]3O)C2=NC=N1	Nucleotides	Purine Metabolism, Adenine containing	Sensitivity	Inverse variance weighted (fixed effects)	-	-	-	-	-	-	-	-	3	0.94 (0.75-1.18)	0.578913	-	-	-	-	-	-	-
	adenosine 5'-monophosphate (AMP)	32342	HMDB00045	6083	C00020	NC1=C2N=CN([C@@H]3O[C@H](COP(O)(O)=O)[C@@H](O)[C@H]3O)C2=NC=N1	Nucleotides	Purine Metabolism, Adenine containing	Sensitivity	Inverse variance weighted (multiplicative random effects)	-	-	-	-	-	-	-	-	3	0.94 (0.84-1.04)	0.234472	-	-	-	-	-	-	-
	adenosine 5'-monophosphate (AMP)	32342	HMDB00045	6083	C00020	NC1=C2N=CN([C@@H]3O[C@H](COP(O)(O)=O)[C@@H](O)[C@H]3O)C2=NC=N1	Nucleotides	Purine Metabolism, Adenine containing	Sensitivity	MR Egger	-	-	-	-	-	-	-	-	3	0.58 (0.1-3.38)	0.654082	-	-	-	-	-	-	-
	adenosine 5'-monophosphate (AMP)	32342	HMDB00045	6083	C00020	NC1=C2N=CN([C@@H]3O[C@H](COP(O)(O)=O)[C@@H](O)[C@H]3O)C2=NC=N1	Nucleotides	Purine Metabolism, Adenine containing	Sensitivity	Weighted median	-	-	-	-	-	-	-	-	3	0.97 (0.74-1.27)	0.804692	-	-	-	-	-	-	-
	adenosine 5'-monophosphate (AMP)	32342	HMDB00045	6083	C00020	NC1=C2N=CN([C@@H]3O[C@H](COP(O)(O)=O)[C@@H](O)[C@H]3O)C2=NC=N1	Nucleotides	Purine Metabolism, Adenine containing	Sensitivity	Weighted mode	-	-	-	-	-	-	-	-	3	0.99 (0.72-1.37)	0.97409	-	-	-	-	-	-	-
	adipoylcarnitine (C6-DC)	52988	HMDB61677	71296139	-	C[N+](C)(C)C[C@@H](CC(O)=O)OC(=O)CCCCC(O)=O	Lipids	Fatty Acid Metabolism (Acyl Carnitine)	Primary	Inverse variance weighted (random effects)/ Wald ratio	-	-	-	-	-	-	-	-	4	0.87 (0.71-1.06)	0.15647	0.6257	-	-	-	-	-	-
	adipoylcarnitine (C6-DC)	52988	HMDB61677	71296139	-	C[N+](C)(C)C[C@@H](CC(O)=O)OC(=O)CCCCC(O)=O	Lipids	Fatty Acid Metabolism (Acyl Carnitine)	Sensitivity	Inverse variance weighted (fixed effects)	-	-	-	-	-	-	-	-	4	0.87 (0.71-1.06)	0.15647	-	-	-	-	-	-	-
	adipoylcarnitine (C6-DC)	52988	HMDB61677	71296139	-	C[N+](C)(C)C[C@@H](CC(O)=O)OC(=O)CCCCC(O)=O	Lipids	Fatty Acid Metabolism (Acyl Carnitine)	Sensitivity	Inverse variance weighted (multiplicative random effects)	-	-	-	-	-	-	-	-	4	0.87 (0.81-0.93)	2.27e-05	-	-	-	-	-	-	-
	adipoylcarnitine (C6-DC)	52988	HMDB61677	71296139	-	C[N+](C)(C)C[C@@H](CC(O)=O)OC(=O)CCCCC(O)=O	Lipids	Fatty Acid Metabolism (Acyl Carnitine)	Sensitivity	MR Egger	-	-	-	-	-	-	-	-	4	0.66 (0.24-1.81)	0.501052	-	-	-	-	-	-	-
	adipoylcarnitine (C6-DC)	52988	HMDB61677	71296139	-	C[N+](C)(C)C[C@@H](CC(O)=O)OC(=O)CCCCC(O)=O	Lipids	Fatty Acid Metabolism (Acyl Carnitine)	Sensitivity	Weighted median	-	-	-	-	-	-	-	-	4	0.85 (0.67-1.09)	0.205145	-	-	-	-	-	-	-
	adipoylcarnitine (C6-DC)	52988	HMDB61677	71296139	-	C[N+](C)(C)C[C@@H](CC(O)=O)OC(=O)CCCCC(O)=O	Lipids	Fatty Acid Metabolism (Acyl Carnitine)	Sensitivity	Weighted mode	-	-	-	-	-	-	-	-	4	0.85 (0.65-1.11)	0.322591	-	-	-	-	-	-	-
	adrenate (22:4n6)	32980	HMDB02226	5497181	C16527	CCCCC\C=C/C\C=C/C\C=C/C\C=C/CCCCCC(O)=O	Lipids	Polyunsaturated Fatty Acid (n3 and n6)	Primary	Inverse variance weighted (random effects)/ Wald ratio	-	-	-	-	1	1.03 (0.99-1.06)	0.0995811	0.341021	14	1.14 (1.04-1.25)	0.00504618	0.0713674	2	1.04 (1.01-1.07)	0.0134604	0.0928062	77.6141	0.0345536
	adrenate (22:4n6)	32980	HMDB02226	5497181	C16527	CCCCC\C=C/C\C=C/C\C=C/C\C=C/CCCCCC(O)=O	Lipids	Polyunsaturated Fatty Acid (n3 and n6)	Sensitivity	Inverse variance weighted (fixed effects)	-	-	-	-	-	-	-	-	14	1.14 (1.04-1.25)	0.00504618	-	-	-	-	-	-	-
	adrenate (22:4n6)	32980	HMDB02226	5497181	C16527	CCCCC\C=C/C\C=C/C\C=C/C\C=C/CCCCCC(O)=O	Lipids	Polyunsaturated Fatty Acid (n3 and n6)	Sensitivity	Inverse variance weighted (multiplicative random effects)	-	-	-	-	-	-	-	-	14	1.14 (1.07-1.22)	0.000165104	-	-	-	-	-	-	-
	adrenate (22:4n6)	32980	HMDB02226	5497181	C16527	CCCCC\C=C/C\C=C/C\C=C/C\C=C/CCCCCC(O)=O	Lipids	Polyunsaturated Fatty Acid (n3 and n6)	Sensitivity	MR Egger	-	-	-	-	-	-	-	-	14	1.13 (0.77-1.67)	0.538527	-	-	-	-	-	-	-
	adrenate (22:4n6)	32980	HMDB02226	5497181	C16527	CCCCC\C=C/C\C=C/C\C=C/C\C=C/CCCCCC(O)=O	Lipids	Polyunsaturated Fatty Acid (n3 and n6)	Sensitivity	Weighted median	-	-	-	-	-	-	-	-	14	1.17 (1.03-1.33)	0.01844	-	-	-	-	-	-	-
	adrenate (22:4n6)	32980	HMDB02226	5497181	C16527	CCCCC\C=C/C\C=C/C\C=C/C\C=C/CCCCCC(O)=O	Lipids	Polyunsaturated Fatty Acid (n3 and n6)	Sensitivity	Weighted mode	-	-	-	-	-	-	-	-	14	1.17 (0.99-1.39)	0.0896686	-	-	-	-	-	-	-
	alanine	1126	HMDB00161	5950	C00041	C[C@H](N)C(O)=O	Amino Acids	Alanine and Aspartate Metabolism	Primary	Inverse variance weighted (random effects)/ Wald ratio	-	-	-	-	-	-	-	-	1	0.58 (0.39-0.87)	0.00879393	0.106171	-	-	-	-	-	-
	alanylleucine	37093	HMDB0028691	96801	-	CC(C)C[C@H](NC(=O)[C@H](C)N)C(O)=O	Peptides	Dipeptide	Primary	Inverse variance weighted (random effects)/ Wald ratio	2	0.94 (0.86-1.03)	0.209841	0.863252	1	1.01 (0.98-1.04)	0.598509	0.856985	-	-	-	-	2	1 (0.97-1.03)	0.902806	0.939606	45.4979	0.175563
	alanylleucine	37093	HMDB0028691	96801	-	CC(C)C[C@H](NC(=O)[C@H](C)N)C(O)=O	Peptides	Dipeptide	Sensitivity	Inverse variance weighted (fixed effects)	2	0.94 (0.86-1.03)	0.209841	-	-	-	-	-	-	-	-	-	-	-	-	-	-	-
	alanylleucine	37093	HMDB0028691	96801	-	CC(C)C[C@H](NC(=O)[C@H](C)N)C(O)=O	Peptides	Dipeptide	Sensitivity	Inverse variance weighted (multiplicative random effects)	2	0.94 (0.87-1.02)	0.124964	-	-	-	-	-	-	-	-	-	-	-	-	-	-	-
	allantoin	1107	HMDB00462	204	C02350	NC(=O)NC1NC(=O)NC1=O	Nucleotides	Purine Metabolism, (Hypo)Xanthine/Inosine containing	Primary	Inverse variance weighted (random effects)/ Wald ratio	1	1.06 (0.92-1.23)	0.425225	0.863252	1	0.99 (0.94-1.05)	0.852867	0.95162	1	1.06 (0.72-1.55)	0.778641	0.994872	3	1 (0.95-1.06)	0.885434	0.939606	0	0.694735
	alliin	41494	HMDB33592	87310	C08265	N[C@@H](CS(=O)CC=C)C(O)=O	Xenobiotics	Food Component/Plant	Primary	Inverse variance weighted (random effects)/ Wald ratio	-	-	-	-	-	-	-	-	2	1.11 (0.99-1.25)	0.0804949	0.433097	-	-	-	-	-	-
	alliin	41494	HMDB33592	87310	C08265	N[C@@H](CS(=O)CC=C)C(O)=O	Xenobiotics	Food Component/Plant	Sensitivity	Inverse variance weighted (fixed effects)	-	-	-	-	-	-	-	-	2	1.11 (0.99-1.25)	0.0804949	-	-	-	-	-	-	-
	alliin	41494	HMDB33592	87310	C08265	N[C@@H](CS(=O)CC=C)C(O)=O	Xenobiotics	Food Component/Plant	Sensitivity	Inverse variance weighted (multiplicative random effects)	-	-	-	-	-	-	-	-	2	1.11 (1.09-1.14)	4.76e-19	-	-	-	-	-	-	-
	alpha-CEHC glucuronide*	39346	-	-	-	-	Cofactors and Vitamins	Tocopherol Metabolism	Primary	Inverse variance weighted (random effects)/ Wald ratio	-	-	-	-	-	-	-	-	1	1.08 (0.86-1.37)	0.491513	0.987241	-	-	-	-	-	-
	alpha-hydroxyisovalerate	46537	HMDB00407	99823	-	CC(C)C(O)C(O)=O	Amino Acids	Leucine, Isoleucine and Valine Metabolism	Primary	Inverse variance weighted (random effects)/ Wald ratio	3	1.01 (0.86-1.19)	0.90023	0.966361	2	0.99 (0.88-1.13)	0.925625	0.960725	6	0.92 (0.8-1.06)	0.247993	0.797122	3	0.97 (0.9-1.05)	0.505552	0.80765	0	0.632645
	alpha-hydroxyisovalerate	46537	HMDB00407	99823	-	CC(C)C(O)C(O)=O	Amino Acids	Leucine, Isoleucine and Valine Metabolism	Sensitivity	Inverse variance weighted (fixed effects)	3	1.01 (0.95-1.08)	0.751002	-	2	0.99 (0.95-1.03)	0.770993	-	6	0.92 (0.81-1.05)	0.221723	-	-	-	-	-	-	-
	alpha-hydroxyisovalerate	46537	HMDB00407	99823	-	CC(C)C(O)C(O)=O	Amino Acids	Leucine, Isoleucine and Valine Metabolism	Sensitivity	Inverse variance weighted (multiplicative random effects)	3	1.01 (0.86-1.19)	0.90023	-	2	0.99 (0.88-1.13)	0.925625	-	6	0.92 (0.8-1.06)	0.247993	-	-	-	-	-	-	-
	alpha-hydroxyisovalerate	46537	HMDB00407	99823	-	CC(C)C(O)C(O)=O	Amino Acids	Leucine, Isoleucine and Valine Metabolism	Sensitivity	MR Egger	3	1.02 (0.46-2.23)	0.973788	-	-	-	-	-	6	0.83 (0.57-1.2)	0.374979	-	-	-	-	-	-	-
	alpha-hydroxyisovalerate	46537	HMDB00407	99823	-	CC(C)C(O)C(O)=O	Amino Acids	Leucine, Isoleucine and Valine Metabolism	Sensitivity	Weighted median	3	1.07 (0.99-1.15)	0.103715	-	-	-	-	-	6	0.91 (0.78-1.07)	0.247004	-	-	-	-	-	-	-
	alpha-hydroxyisovalerate	46537	HMDB00407	99823	-	CC(C)C(O)C(O)=O	Amino Acids	Leucine, Isoleucine and Valine Metabolism	Sensitivity	Weighted mode	3	1.07 (1-1.15)	0.208361	-	-	-	-	-	6	0.91 (0.76-1.09)	0.356473	-	-	-	-	-	-	-
	alpha-hydroxypregnenolone glucuronide	-	-	-	-	-	Lipids	Pregnenolone Steroids	Primary	Inverse variance weighted (random effects)/ Wald ratio	-	-	-	-	-	-	-	-	1	1.04 (0.77-1.38)	0.812505	0.994872	-	-	-	-	-	-
	alpha-ketoglutarate	528	HMDB00208	51	C00026	OC(=O)CCC(=O)C(O)=O	Energy	TCA Cycle	Primary	Inverse variance weighted (random effects)/ Wald ratio	-	-	-	-	-	-	-	-	1	1.08 (0.66-1.74)	0.767246	0.994872	-	-	-	-	-	-
	alpha-tocopherol	1561	HMDB01893	14985	C02477	CC(C)CCC[C@@H](C)CCC[C@@H](C)CCC[C@]1(C)CCC2=C(C)C(O)=C(C)C(C)=C2O1	Cofactors and Vitamins	Tocopherol Metabolism	Primary	Inverse variance weighted (random effects)/ Wald ratio	-	-	-	-	-	-	-	-	2	1.07 (0.81-1.41)	0.638605	0.994872	-	-	-	-	-	-
	alpha-tocopherol	1561	HMDB01893	14985	C02477	CC(C)CCC[C@@H](C)CCC[C@@H](C)CCC[C@]1(C)CCC2=C(C)C(O)=C(C)C(C)=C2O1	Cofactors and Vitamins	Tocopherol Metabolism	Sensitivity	Inverse variance weighted (fixed effects)	-	-	-	-	-	-	-	-	2	1.07 (0.81-1.41)	0.638605	-	-	-	-	-	-	-
	alpha-tocopherol	1561	HMDB01893	14985	C02477	CC(C)CCC[C@@H](C)CCC[C@@H](C)CCC[C@]1(C)CCC2=C(C)C(O)=C(C)C(C)=C2O1	Cofactors and Vitamins	Tocopherol Metabolism	Sensitivity	Inverse variance weighted (multiplicative random effects)	-	-	-	-	-	-	-	-	2	1.07 (0.87-1.32)	0.535944	-	-	-	-	-	-	-
	andro steroid monosulfate C19H28O6S (1)*	32827	HMDB02759	159663	C04555	[H][C@@]12CCC(=O)[C@@]1(C)CC[C@@]1([H])[C@@]2([H])CC[C@@]2([H])C[C@@H](CC[C@]12C)OS(O)(=O)=O	Lipids	Androgenic Steroids	Primary	Inverse variance weighted (random effects)/ Wald ratio	-	-	-	-	-	-	-	-	3	0.99 (0.85-1.16)	0.920188	0.999021	-	-	-	-	-	-
	andro steroid monosulfate C19H28O6S (1)*	32827	HMDB02759	159663	C04555	[H][C@@]12CCC(=O)[C@@]1(C)CC[C@@]1([H])[C@@]2([H])CC[C@@]2([H])C[C@@H](CC[C@]12C)OS(O)(=O)=O	Lipids	Androgenic Steroids	Sensitivity	Inverse variance weighted (fixed effects)	-	-	-	-	-	-	-	-	3	0.99 (0.85-1.16)	0.920188	-	-	-	-	-	-	-
	andro steroid monosulfate C19H28O6S (1)*	32827	HMDB02759	159663	C04555	[H][C@@]12CCC(=O)[C@@]1(C)CC[C@@]1([H])[C@@]2([H])CC[C@@]2([H])C[C@@H](CC[C@]12C)OS(O)(=O)=O	Lipids	Androgenic Steroids	Sensitivity	Inverse variance weighted (multiplicative random effects)	-	-	-	-	-	-	-	-	3	0.99 (0.88-1.12)	0.891464	-	-	-	-	-	-	-
	andro steroid monosulfate C19H28O6S (1)*	32827	HMDB02759	159663	C04555	[H][C@@]12CCC(=O)[C@@]1(C)CC[C@@]1([H])[C@@]2([H])CC[C@@]2([H])C[C@@H](CC[C@]12C)OS(O)(=O)=O	Lipids	Androgenic Steroids	Sensitivity	MR Egger	-	-	-	-	-	-	-	-	3	0.89 (0.67-1.17)	0.547451	-	-	-	-	-	-	-
	andro steroid monosulfate C19H28O6S (1)*	32827	HMDB02759	159663	C04555	[H][C@@]12CCC(=O)[C@@]1(C)CC[C@@]1([H])[C@@]2([H])CC[C@@]2([H])C[C@@H](CC[C@]12C)OS(O)(=O)=O	Lipids	Androgenic Steroids	Sensitivity	Weighted median	-	-	-	-	-	-	-	-	3	0.96 (0.81-1.14)	0.663557	-	-	-	-	-	-	-
	andro steroid monosulfate C19H28O6S (1)*	32827	HMDB02759	159663	C04555	[H][C@@]12CCC(=O)[C@@]1(C)CC[C@@]1([H])[C@@]2([H])CC[C@@]2([H])C[C@@H](CC[C@]12C)OS(O)(=O)=O	Lipids	Androgenic Steroids	Sensitivity	Weighted mode	-	-	-	-	-	-	-	-	3	0.95 (0.76-1.18)	0.677581	-	-	-	-	-	-	-
	androstenediol (3alpha, 17alpha) monosulfate (2)	37207	-	-	-	-	Lipids	Androgenic Steroids	Primary	Inverse variance weighted (random effects)/ Wald ratio	-	-	-	-	-	-	-	-	2	0.96 (0.8-1.14)	0.636273	0.994872	-	-	-	-	-	-
	androstenediol (3alpha, 17alpha) monosulfate (2)	37207	-	-	-	-	Lipids	Androgenic Steroids	Sensitivity	Inverse variance weighted (fixed effects)	-	-	-	-	-	-	-	-	2	0.96 (0.8-1.14)	0.636273	-	-	-	-	-	-	-
	androstenediol (3alpha, 17alpha) monosulfate (2)	37207	-	-	-	-	Lipids	Androgenic Steroids	Sensitivity	Inverse variance weighted (multiplicative random effects)	-	-	-	-	-	-	-	-	2	0.96 (0.94-0.98)	2.36e-05	-	-	-	-	-	-	-
	androstenediol-(3alpha,17alpha)-disulfate-(2)	-	-	-	-	-	Lipids	Androgenic Steroids	Primary	Inverse variance weighted (random effects)/ Wald ratio	-	-	-	-	-	-	-	-	9	0.98 (0.88-1.09)	0.727385	0.994872	-	-	-	-	-	-
	androstenediol-(3alpha,17alpha)-disulfate-(2)	-	-	-	-	-	Lipids	Androgenic Steroids	Sensitivity	Inverse variance weighted (fixed effects)	-	-	-	-	-	-	-	-	9	0.98 (0.88-1.09)	0.727385	-	-	-	-	-	-	-
	androstenediol-(3alpha,17alpha)-disulfate-(2)	-	-	-	-	-	Lipids	Androgenic Steroids	Sensitivity	Inverse variance weighted (multiplicative random effects)	-	-	-	-	-	-	-	-	9	0.98 (0.89-1.08)	0.697297	-	-	-	-	-	-	-
	androstenediol-(3alpha,17alpha)-disulfate-(2)	-	-	-	-	-	Lipids	Androgenic Steroids	Sensitivity	MR Egger	-	-	-	-	-	-	-	-	9	1.14 (0.92-1.41)	0.285853	-	-	-	-	-	-	-
	androstenediol-(3alpha,17alpha)-disulfate-(2)	-	-	-	-	-	Lipids	Androgenic Steroids	Sensitivity	Weighted median	-	-	-	-	-	-	-	-	9	1.01 (0.88-1.16)	0.89488	-	-	-	-	-	-	-
	androstenediol-(3alpha,17alpha)-disulfate-(2)	-	-	-	-	-	Lipids	Androgenic Steroids	Sensitivity	Weighted mode	-	-	-	-	-	-	-	-	9	1.03 (0.89-1.2)	0.668271	-	-	-	-	-	-	-
	androstenediol-(3beta,17beta)-disulfate-(1)	-	-	-	-	-	Lipids	Androgenic Steroids	Primary	Inverse variance weighted (random effects)/ Wald ratio	-	-	-	-	-	-	-	-	2	1.05 (0.88-1.26)	0.56933	0.994872	-	-	-	-	-	-
	androstenediol-(3beta,17beta)-disulfate-(1)	-	-	-	-	-	Lipids	Androgenic Steroids	Sensitivity	Inverse variance weighted (fixed effects)	-	-	-	-	-	-	-	-	2	1.05 (0.88-1.26)	0.56933	-	-	-	-	-	-	-
	androstenediol-(3beta,17beta)-disulfate-(1)	-	-	-	-	-	Lipids	Androgenic Steroids	Sensitivity	Inverse variance weighted (multiplicative random effects)	-	-	-	-	-	-	-	-	2	1.05 (1.01-1.1)	0.0221648	-	-	-	-	-	-	-
	androstenediol-(3beta,17beta)-disulfate-(2)	-	-	-	-	-	Lipids	Androgenic Steroids	Primary	Inverse variance weighted (random effects)/ Wald ratio	-	-	-	-	-	-	-	-	2	0.91 (0.71-1.17)	0.478137	0.987241	-	-	-	-	-	-
	androstenediol-(3beta,17beta)-disulfate-(2)	-	-	-	-	-	Lipids	Androgenic Steroids	Sensitivity	Inverse variance weighted (fixed effects)	-	-	-	-	-	-	-	-	2	0.91 (0.72-1.17)	0.471045	-	-	-	-	-	-	-
	androstenediol-(3beta,17beta)-disulfate-(2)	-	-	-	-	-	Lipids	Androgenic Steroids	Sensitivity	Inverse variance weighted (multiplicative random effects)	-	-	-	-	-	-	-	-	2	0.91 (0.71-1.17)	0.478137	-	-	-	-	-	-	-
	androstenediol-(3beta,17beta)-monosulfate-(1)	-	-	-	-	-	Lipids	Androgenic Steroids	Primary	Inverse variance weighted (random effects)/ Wald ratio	-	-	-	-	-	-	-	-	2	1.01 (0.75-1.36)	0.935097	0.999021	-	-	-	-	-	-
	androstenediol-(3beta,17beta)-monosulfate-(1)	-	-	-	-	-	Lipids	Androgenic Steroids	Sensitivity	Inverse variance weighted (fixed effects)	-	-	-	-	-	-	-	-	2	1.01 (0.75-1.36)	0.935097	-	-	-	-	-	-	-
	androstenediol-(3beta,17beta)-monosulfate-(1)	-	-	-	-	-	Lipids	Androgenic Steroids	Sensitivity	Inverse variance weighted (multiplicative random effects)	-	-	-	-	-	-	-	-	2	1.01 (0.99-1.03)	0.236511	-	-	-	-	-	-	-
	androstenediol-(3beta,17beta)-monosulfate-(2)	-	-	-	-	-	Lipids	Androgenic Steroids	Primary	Inverse variance weighted (random effects)/ Wald ratio	-	-	-	-	-	-	-	-	1	0.92 (0.62-1.35)	0.658392	0.994872	-	-	-	-	-	-
	androsterone sulfate	31591	HMDB02759	159663	-	[H][C@@]12CCC(=O)[C@@]1(C)CC[C@@]1([H])[C@@]2([H])CC[C@@]2([H])C[C@@H](CC[C@]12C)OS(O)(=O)=O	Lipids	Androgenic Steroids	Primary	Inverse variance weighted (random effects)/ Wald ratio	3	1.05 (0.96-1.14)	0.278767	0.863252	3	1 (0.99-1.02)	0.73472	0.909243	7	0.99 (0.88-1.1)	0.81696	0.994872	3	1 (0.99-1.02)	0.610698	0.856655	0	0.582086
	androsterone sulfate	31591	HMDB02759	159663	-	[H][C@@]12CCC(=O)[C@@]1(C)CC[C@@]1([H])[C@@]2([H])CC[C@@]2([H])C[C@@H](CC[C@]12C)OS(O)(=O)=O	Lipids	Androgenic Steroids	Sensitivity	Inverse variance weighted (fixed effects)	3	1.05 (0.97-1.14)	0.258656	-	3	1 (0.99-1.02)	0.73472	-	7	0.99 (0.88-1.1)	0.81696	-	-	-	-	-	-	-
	androsterone sulfate	31591	HMDB02759	159663	-	[H][C@@]12CCC(=O)[C@@]1(C)CC[C@@]1([H])[C@@]2([H])CC[C@@]2([H])C[C@@H](CC[C@]12C)OS(O)(=O)=O	Lipids	Androgenic Steroids	Sensitivity	Inverse variance weighted (multiplicative random effects)	3	1.05 (0.96-1.14)	0.278767	-	3	1 (0.99-1.02)	0.646174	-	7	0.99 (0.92-1.05)	0.699208	-	-	-	-	-	-	-
	androsterone sulfate	31591	HMDB02759	159663	-	[H][C@@]12CCC(=O)[C@@]1(C)CC[C@@]1([H])[C@@]2([H])CC[C@@]2([H])C[C@@H](CC[C@]12C)OS(O)(=O)=O	Lipids	Androgenic Steroids	Sensitivity	MR Egger	3	0.92 (0.76-1.11)	0.557775	-	3	1.01 (0.98-1.04)	0.522601	-	7	1 (0.85-1.17)	0.996341	-	-	-	-	-	-	-
	androsterone sulfate	31591	HMDB02759	159663	-	[H][C@@]12CCC(=O)[C@@]1(C)CC[C@@]1([H])[C@@]2([H])CC[C@@]2([H])C[C@@H](CC[C@]12C)OS(O)(=O)=O	Lipids	Androgenic Steroids	Sensitivity	Weighted median	3	1.04 (0.93-1.15)	0.49606	-	3	1 (0.98-1.02)	0.787697	-	7	0.99 (0.87-1.12)	0.86845	-	-	-	-	-	-	-
	androsterone sulfate	31591	HMDB02759	159663	-	[H][C@@]12CCC(=O)[C@@]1(C)CC[C@@]1([H])[C@@]2([H])CC[C@@]2([H])C[C@@H](CC[C@]12C)OS(O)(=O)=O	Lipids	Androgenic Steroids	Sensitivity	Weighted mode	3	1.02 (0.91-1.15)	0.730806	-	3	1.01 (0.99-1.03)	0.510506	-	7	0.99 (0.87-1.13)	0.909986	-	-	-	-	-	-	-
	anthranilate	57746	HMDB01123	227	C00108	NC1=CC=CC=C1C(O)=O	Amino Acids	Tryptophan Metabolism	Primary	Inverse variance weighted (random effects)/ Wald ratio	1	1.03 (0.87-1.21)	0.716663	0.878415	-	-	-	-	-	-	-	-	-	-	-	-	-	-
	arabinose	575	HMDB00646	66308	C00216	O[C@H]1CO[C@H](O)[C@H](O)[C@H]1O	Carbohydrates	Pentose Metabolism	Primary	Inverse variance weighted (random effects)/ Wald ratio	1	1.03 (0.9-1.19)	0.64589	0.878415	-	-	-	-	1	1.02 (0.69-1.51)	0.905662	0.997882	2	1.03 (0.9-1.18)	0.636727	0.85991	0	0.963368
	arabitol/xylitol	48885	HMDB0002917	6912	C01904	OC[C@H](O)[C@@H](O)[C@H](O)CO	Carbohydrates	Pentose Metabolism	Primary	Inverse variance weighted (random effects)/ Wald ratio	-	-	-	-	-	-	-	-	2	1 (0.73-1.38)	0.994145	0.999026	-	-	-	-	-	-
	arabitol/xylitol	48885	HMDB0002917	6912	C01904	OC[C@H](O)[C@@H](O)[C@H](O)CO	Carbohydrates	Pentose Metabolism	Sensitivity	Inverse variance weighted (fixed effects)	-	-	-	-	-	-	-	-	2	1 (0.73-1.38)	0.994145	-	-	-	-	-	-	-
	arabitol/xylitol	48885	HMDB0002917	6912	C01904	OC[C@H](O)[C@@H](O)[C@H](O)CO	Carbohydrates	Pentose Metabolism	Sensitivity	Inverse variance weighted (multiplicative random effects)	-	-	-	-	-	-	-	-	2	1 (0.8-1.25)	0.991556	-	-	-	-	-	-	-
	arabonate/xylonate	48255	-	-	-	-	Carbohydrates	Pentose Metabolism	Primary	Inverse variance weighted (random effects)/ Wald ratio	-	-	-	-	-	-	-	-	1	1.02 (0.73-1.42)	0.908762	0.997882	-	-	-	-	-	-
	arachidate (20:0)	1118	HMDB02212	10467	C06425	CCCCCCCCCCCCCCCCCCCC(O)=O	Lipids	Long Chain Fatty Acid	Primary	Inverse variance weighted (random effects)/ Wald ratio	-	-	-	-	-	-	-	-	1	0.81 (0.46-1.42)	0.454001	0.987241	-	-	-	-	-	-
	arachidonate (20:4n6)	1110	HMDB01043	444899	C00219	CCCCC\C=C/C\C=C/C\C=C/C\C=C/CCCC(O)=O	Lipids	Polyunsaturated Fatty Acid (n3 and n6)	Primary	Inverse variance weighted (random effects)/ Wald ratio	2	1.06 (0.97-1.17)	0.216321	0.863252	1	1.02 (1-1.04)	0.0622067	0.287844	98	1.19 (1.14-1.23)	1.09e-20	1.08e-18	3	1.06 (1.04-1.08)	9.04831e-11	5.92665e-09	95.9983	1.40335e-11
	arachidonate (20:4n6)	1110	HMDB01043	444899	C00219	CCCCC\C=C/C\C=C/C\C=C/C\C=C/CCCC(O)=O	Lipids	Polyunsaturated Fatty Acid (n3 and n6)	Sensitivity	Inverse variance weighted (fixed effects)	2	1.06 (0.97-1.17)	0.216321	-	-	-	-	-	98	1.19 (1.15-1.23)	3.03e-23	-	-	-	-	-	-	-
	arachidonate (20:4n6)	1110	HMDB01043	444899	C00219	CCCCC\C=C/C\C=C/C\C=C/C\C=C/CCCC(O)=O	Lipids	Polyunsaturated Fatty Acid (n3 and n6)	Sensitivity	Inverse variance weighted (multiplicative random effects)	2	1.06 (0.98-1.15)	0.120321	-	-	-	-	-	98	1.19 (1.14-1.23)	1.09e-20	-	-	-	-	-	-	-
	arachidonate (20:4n6)	1110	HMDB01043	444899	C00219	CCCCC\C=C/C\C=C/C\C=C/C\C=C/CCCC(O)=O	Lipids	Polyunsaturated Fatty Acid (n3 and n6)	Sensitivity	MR Egger	-	-	-	-	-	-	-	-	98	1.04 (0.94-1.16)	0.440912	-	-	-	-	-	-	-
	arachidonate (20:4n6)	1110	HMDB01043	444899	C00219	CCCCC\C=C/C\C=C/C\C=C/C\C=C/CCCC(O)=O	Lipids	Polyunsaturated Fatty Acid (n3 and n6)	Sensitivity	Weighted median	-	-	-	-	-	-	-	-	98	1.13 (1.07-1.19)	3.2e-06	-	-	-	-	-	-	-
	arachidonate (20:4n6)	1110	HMDB01043	444899	C00219	CCCCC\C=C/C\C=C/C\C=C/C\C=C/CCCC(O)=O	Lipids	Polyunsaturated Fatty Acid (n3 and n6)	Sensitivity	Weighted mode	-	-	-	-	-	-	-	-	98	1.13 (1.05-1.21)	0.001733	-	-	-	-	-	-	-
	arachidonoylcholine	53261	HMDB0240583	122198216	-	CCCCC\C=C/C\C=C/C\C=C/C\C=C/CCCC(=O)OCC[N+](C)(C)C	Lipids	Fatty Acid Metabolism (Acyl Choline)	Primary	Inverse variance weighted (random effects)/ Wald ratio	-	-	-	-	-	-	-	-	35	1.19 (1.12-1.26)	3.45118e-09	1.71e-07	-	-	-	-	-	-
	arachidonoylcholine	53261	HMDB0240583	122198216	-	CCCCC\C=C/C\C=C/C\C=C/C\C=C/CCCC(=O)OCC[N+](C)(C)C	Lipids	Fatty Acid Metabolism (Acyl Choline)	Sensitivity	Inverse variance weighted (fixed effects)	-	-	-	-	-	-	-	-	35	1.19 (1.12-1.26)	3.45118e-09	-	-	-	-	-	-	-
	arachidonoylcholine	53261	HMDB0240583	122198216	-	CCCCC\C=C/C\C=C/C\C=C/C\C=C/CCCC(=O)OCC[N+](C)(C)C	Lipids	Fatty Acid Metabolism (Acyl Choline)	Sensitivity	Inverse variance weighted (multiplicative random effects)	-	-	-	-	-	-	-	-	35	1.19 (1.13-1.25)	1.3104e-11	-	-	-	-	-	-	-
	arachidonoylcholine	53261	HMDB0240583	122198216	-	CCCCC\C=C/C\C=C/C\C=C/C\C=C/CCCC(=O)OCC[N+](C)(C)C	Lipids	Fatty Acid Metabolism (Acyl Choline)	Sensitivity	MR Egger	-	-	-	-	-	-	-	-	35	1.16 (0.95-1.42)	0.144304	-	-	-	-	-	-	-
	arachidonoylcholine	53261	HMDB0240583	122198216	-	CCCCC\C=C/C\C=C/C\C=C/C\C=C/CCCC(=O)OCC[N+](C)(C)C	Lipids	Fatty Acid Metabolism (Acyl Choline)	Sensitivity	Weighted median	-	-	-	-	-	-	-	-	35	1.14 (1.04-1.24)	0.0028753	-	-	-	-	-	-	-
	arachidonoylcholine	53261	HMDB0240583	122198216	-	CCCCC\C=C/C\C=C/C\C=C/C\C=C/CCCC(=O)OCC[N+](C)(C)C	Lipids	Fatty Acid Metabolism (Acyl Choline)	Sensitivity	Weighted mode	-	-	-	-	-	-	-	-	35	1.13 (1.01-1.27)	0.0371347	-	-	-	-	-	-	-
	argininate*	57461	HMDB03148	160437	-	NC(=N)NCCC[C@H](O)C(O)=O	Amino Acids	Urea cycle; Arginine and Proline Metabolism	Primary	Inverse variance weighted (random effects)/ Wald ratio	-	-	-	-	-	-	-	-	1	0.97 (0.64-1.48)	0.889545	0.997496	-	-	-	-	-	-
	arginine	1638	HMDB00517	232	C00062	N[C@@H](CCCNC(N)=N)C(O)=O	Amino Acids	Urea cycle; Arginine and Proline Metabolism	Primary	Inverse variance weighted (random effects)/ Wald ratio	2	0.95 (0.86-1.05)	0.281376	0.863252	1	1.01 (0.97-1.04)	0.775234	0.909243	3	1.25 (1.03-1.53)	0.0272748	0.198545	3	1 (0.97-1.04)	0.786962	0.9372	66.8985	0.0487517
	arginine	1638	HMDB00517	232	C00062	N[C@@H](CCCNC(N)=N)C(O)=O	Amino Acids	Urea cycle; Arginine and Proline Metabolism	Sensitivity	Inverse variance weighted (fixed effects)	2	0.95 (0.86-1.05)	0.281376	-	-	-	-	-	3	1.25 (1.03-1.53)	0.0272748	-	-	-	-	-	-	-
	arginine	1638	HMDB00517	232	C00062	N[C@@H](CCCNC(N)=N)C(O)=O	Amino Acids	Urea cycle; Arginine and Proline Metabolism	Sensitivity	Inverse variance weighted (multiplicative random effects)	2	0.95 (0.86-1.04)	0.275224	-	-	-	-	-	3	1.25 (1.2-1.31)	2.3124e-24	-	-	-	-	-	-	-
	arginine	1638	HMDB00517	232	C00062	N[C@@H](CCCNC(N)=N)C(O)=O	Amino Acids	Urea cycle; Arginine and Proline Metabolism	Sensitivity	MR Egger	-	-	-	-	-	-	-	-	3	1.27 (0.73-2.23)	0.555329	-	-	-	-	-	-	-
	arginine	1638	HMDB00517	232	C00062	N[C@@H](CCCNC(N)=N)C(O)=O	Amino Acids	Urea cycle; Arginine and Proline Metabolism	Sensitivity	Weighted median	-	-	-	-	-	-	-	-	3	1.26 (1.01-1.58)	0.0387571	-	-	-	-	-	-	-
	arginine	1638	HMDB00517	232	C00062	N[C@@H](CCCNC(N)=N)C(O)=O	Amino Acids	Urea cycle; Arginine and Proline Metabolism	Sensitivity	Weighted mode	-	-	-	-	-	-	-	-	3	1.27 (0.96-1.69)	0.235826	-	-	-	-	-	-	-
	asparagine	512	HMDB00168	6267	C00152	N[C@@H](CC(N)=O)C(O)=O	Amino Acids	Alanine and Aspartate Metabolism	Primary	Inverse variance weighted (random effects)/ Wald ratio	5	1.01 (0.94-1.08)	0.814081	0.927344	4	1 (0.98-1.02)	0.751838	0.909243	5	1.04 (0.87-1.23)	0.673584	0.994872	3	1 (0.98-1.02)	0.847044	0.939606	0	0.86264
	asparagine	512	HMDB00168	6267	C00152	N[C@@H](CC(N)=O)C(O)=O	Amino Acids	Alanine and Aspartate Metabolism	Sensitivity	Inverse variance weighted (fixed effects)	5	1.01 (0.95-1.07)	0.764111	-	4	1 (0.98-1.02)	0.751838	-	5	1.04 (0.92-1.18)	0.561678	-	-	-	-	-	-	-
	asparagine	512	HMDB00168	6267	C00152	N[C@@H](CC(N)=O)C(O)=O	Amino Acids	Alanine and Aspartate Metabolism	Sensitivity	Inverse variance weighted (multiplicative random effects)	5	1.01 (0.94-1.08)	0.814081	-	4	1 (0.98-1.01)	0.607631	-	5	1.04 (0.87-1.23)	0.673584	-	-	-	-	-	-	-
	asparagine	512	HMDB00168	6267	C00152	N[C@@H](CC(N)=O)C(O)=O	Amino Acids	Alanine and Aspartate Metabolism	Sensitivity	MR Egger	5	1.12 (0.94-1.34)	0.303609	-	4	0.98 (0.91-1.06)	0.663558	-	5	1.53 (1.1-2.14)	0.087453	-	-	-	-	-	-	-
	asparagine	512	HMDB00168	6267	C00152	N[C@@H](CC(N)=O)C(O)=O	Amino Acids	Alanine and Aspartate Metabolism	Sensitivity	Weighted median	5	1.02 (0.94-1.1)	0.667409	-	4	1 (0.97-1.02)	0.807565	-	5	1.07 (0.93-1.23)	0.330411	-	-	-	-	-	-	-
	asparagine	512	HMDB00168	6267	C00152	N[C@@H](CC(N)=O)C(O)=O	Amino Acids	Alanine and Aspartate Metabolism	Sensitivity	Weighted mode	5	1.05 (0.93-1.18)	0.469932	-	4	0.99 (0.97-1.02)	0.579571	-	5	1.08 (0.94-1.24)	0.347806	-	-	-	-	-	-	-
	aspartate	443	HMDB00191	5960	C00049	N[C@@H](CC(O)=O)C(O)=O	Amino Acids	Alanine and Aspartate Metabolism	Primary	Inverse variance weighted (random effects)/ Wald ratio	1	0.97 (0.85-1.12)	0.727654	0.878415	-	-	-	-	2	1.46 (1.04-2.04)	0.0291232	0.208927	2	1.04 (0.91-1.18)	0.59635	0.856655	78.265	0.0319556
	aspartate	443	HMDB00191	5960	C00049	N[C@@H](CC(O)=O)C(O)=O	Amino Acids	Alanine and Aspartate Metabolism	Sensitivity	Inverse variance weighted (fixed effects)	-	-	-	-	-	-	-	-	2	1.46 (1.04-2.04)	0.0291232	-	-	-	-	-	-	-
	aspartate	443	HMDB00191	5960	C00049	N[C@@H](CC(O)=O)C(O)=O	Amino Acids	Alanine and Aspartate Metabolism	Sensitivity	Inverse variance weighted (multiplicative random effects)	-	-	-	-	-	-	-	-	2	1.46 (1.2-1.76)	0.000107493	-	-	-	-	-	-	-
	aspartylphenylalanine	-	HMDB00706	93078	-	N[C@@H](CC(O)=O)C(=O)N[C@@H](CC1=CC=CC=C1)C(O)=O	Peptides	Dipeptide	Primary	Inverse variance weighted (random effects)/ Wald ratio	3	1.03 (0.97-1.09)	0.390683	0.863252	3	0.94 (0.9-0.99)	0.0134156	0.144956	-	-	-	-	2	0.97 (0.94-1.01)	0.142001	0.442908	78.6957	0.0302701
	aspartylphenylalanine	-	HMDB00706	93078	-	N[C@@H](CC(O)=O)C(=O)N[C@@H](CC1=CC=CC=C1)C(O)=O	Peptides	Dipeptide	Sensitivity	Inverse variance weighted (fixed effects)	3	1.03 (0.97-1.09)	0.390683	-	3	0.94 (0.91-0.97)	0.000364354	-	-	-	-	-	-	-	-	-	-	-
	aspartylphenylalanine	-	HMDB00706	93078	-	N[C@@H](CC(O)=O)C(=O)N[C@@H](CC1=CC=CC=C1)C(O)=O	Peptides	Dipeptide	Sensitivity	Inverse variance weighted (multiplicative random effects)	3	1.03 (1.01-1.04)	0.000131743	-	3	0.94 (0.9-0.99)	0.0134156	-	-	-	-	-	-	-	-	-	-	-
	aspartylphenylalanine	-	HMDB00706	93078	-	N[C@@H](CC(O)=O)C(=O)N[C@@H](CC1=CC=CC=C1)C(O)=O	Peptides	Dipeptide	Sensitivity	MR Egger	3	1.05 (0.85-1.31)	0.719155	-	3	0.87 (0.79-0.95)	0.211588	-	-	-	-	-	-	-	-	-	-	-
	aspartylphenylalanine	-	HMDB00706	93078	-	N[C@@H](CC(O)=O)C(=O)N[C@@H](CC1=CC=CC=C1)C(O)=O	Peptides	Dipeptide	Sensitivity	Weighted median	3	1.03 (0.96-1.1)	0.370938	-	3	0.95 (0.91-0.99)	0.02347	-	-	-	-	-	-	-	-	-	-	-
	aspartylphenylalanine	-	HMDB00706	93078	-	N[C@@H](CC(O)=O)C(=O)N[C@@H](CC1=CC=CC=C1)C(O)=O	Peptides	Dipeptide	Sensitivity	Weighted mode	3	1.03 (0.96-1.12)	0.498986	-	3	0.96 (0.92-1.01)	0.238332	-	-	-	-	-	-	-	-	-	-	-
	behenoyl dihydrosphingomyelin (d18:0/22:0)*	57331	HMDB12091	44260132	C00550	[H][C@@](COP([O-])(=O)OCC[N+](C)(C)C)(NC(=O)CCCCCCCCCCCCCCCCCCCCC)[C@H](O)CCCCCCCCCCCCCCC	Lipids	Sphingolipid Metabolism	Primary	Inverse variance weighted (random effects)/ Wald ratio	-	-	-	-	-	-	-	-	1	0.97 (0.67-1.42)	0.890693	0.997496	-	-	-	-	-	-
	behenoyl sphingomyelin (d18:1/22:0)*	48492	HMDB12103	44260125	C00550	CCCCCCCCCCCCCCCCCCCCCC(=O)N[C@@H](COP([O-])(=O)OCC[N+](C)(C)C)[C@H](O)\C=C\CCCCCCCCCCCCC	Lipids	Sphingolipid Metabolism	Primary	Inverse variance weighted (random effects)/ Wald ratio	-	-	-	-	-	-	-	-	1	1.11 (0.7-1.75)	0.654761	0.994872	-	-	-	-	-	-
	benzoate	15778	HMDB01870	243	C00180	OC(=O)C1=CC=CC=C1	Xenobiotics	Benzoate Metabolism	Primary	Inverse variance weighted (random effects)/ Wald ratio	-	-	-	-	-	-	-	-	1	0.94 (0.61-1.46)	0.792649	0.994872	-	-	-	-	-	-
	beta-citrylglutamate	54923	-	72715786	C20775	-	Amino Acids	Glutamate Metabolism	Primary	Inverse variance weighted (random effects)/ Wald ratio	-	-	-	-	-	-	-	-	8	0.86 (0.76-0.98)	0.0195367	0.157566	-	-	-	-	-	-
	beta-citrylglutamate	54923	-	72715786	C20775	-	Amino Acids	Glutamate Metabolism	Sensitivity	Inverse variance weighted (fixed effects)	-	-	-	-	-	-	-	-	8	0.86 (0.76-0.98)	0.0195367	-	-	-	-	-	-	-
	beta-citrylglutamate	54923	-	72715786	C20775	-	Amino Acids	Glutamate Metabolism	Sensitivity	Inverse variance weighted (multiplicative random effects)	-	-	-	-	-	-	-	-	8	0.86 (0.79-0.94)	0.000539201	-	-	-	-	-	-	-
	beta-citrylglutamate	54923	-	72715786	C20775	-	Amino Acids	Glutamate Metabolism	Sensitivity	MR Egger	-	-	-	-	-	-	-	-	8	0.88 (0.67-1.17)	0.421807	-	-	-	-	-	-	-
	beta-citrylglutamate	54923	-	72715786	C20775	-	Amino Acids	Glutamate Metabolism	Sensitivity	Weighted median	-	-	-	-	-	-	-	-	8	0.86 (0.74-1)	0.0450161	-	-	-	-	-	-	-
	beta-citrylglutamate	54923	-	72715786	C20775	-	Amino Acids	Glutamate Metabolism	Sensitivity	Weighted mode	-	-	-	-	-	-	-	-	8	0.86 (0.73-1)	0.0981314	-	-	-	-	-	-	-
	beta-cryptoxanthin	57591	HMDB33844	6384256	C08591	C\C(\C=C\C=C(/C)\C=C\C1=C(C)CCCC1(C)C)=C/C=C/C=C(\C)/C=C/C=C(\C)/C=C/C1=C(C)C[C@@H](O)CC1(C)C	Xenobiotics	Food Component/Plant	Primary	Inverse variance weighted (random effects)/ Wald ratio	-	-	-	-	-	-	-	-	1	1.22 (0.77-1.95)	0.39391	0.977965	-	-	-	-	-	-
	beta-hydroxyisovalerate	12129	HMDB00754	69362	C20827	CC(C)(O)CC(O)=O	Amino Acids	Leucine, Isoleucine and Valine Metabolism	Primary	Inverse variance weighted (random effects)/ Wald ratio	1	1.07 (0.93-1.23)	0.355396	0.863252	-	-	-	-	4	1.09 (0.86-1.37)	0.49065	0.987241	2	1.07 (0.95-1.21)	0.251789	0.622347	0	0.899972
	beta-hydroxyisovalerate	12129	HMDB00754	69362	C20827	CC(C)(O)CC(O)=O	Amino Acids	Leucine, Isoleucine and Valine Metabolism	Sensitivity	Inverse variance weighted (fixed effects)	-	-	-	-	-	-	-	-	4	1.09 (0.86-1.37)	0.49065	-	-	-	-	-	-	-
	beta-hydroxyisovalerate	12129	HMDB00754	69362	C20827	CC(C)(O)CC(O)=O	Amino Acids	Leucine, Isoleucine and Valine Metabolism	Sensitivity	Inverse variance weighted (multiplicative random effects)	-	-	-	-	-	-	-	-	4	1.09 (0.87-1.36)	0.467344	-	-	-	-	-	-	-
	beta-hydroxyisovalerate	12129	HMDB00754	69362	C20827	CC(C)(O)CC(O)=O	Amino Acids	Leucine, Isoleucine and Valine Metabolism	Sensitivity	MR Egger	-	-	-	-	-	-	-	-	4	1.25 (0.36-4.38)	0.756658	-	-	-	-	-	-	-
	beta-hydroxyisovalerate	12129	HMDB00754	69362	C20827	CC(C)(O)CC(O)=O	Amino Acids	Leucine, Isoleucine and Valine Metabolism	Sensitivity	Weighted median	-	-	-	-	-	-	-	-	4	1.03 (0.77-1.38)	0.858981	-	-	-	-	-	-	-
	beta-hydroxyisovalerate	12129	HMDB00754	69362	C20827	CC(C)(O)CC(O)=O	Amino Acids	Leucine, Isoleucine and Valine Metabolism	Sensitivity	Weighted mode	-	-	-	-	-	-	-	-	4	1.04 (0.76-1.42)	0.835555	-	-	-	-	-	-	-
	betaine	3141	HMDB00043	247	C00719	C[N+](C)(C)CC(O)=O	Amino Acids	Glycine, Serine and Threonine Metabolism	Primary	Inverse variance weighted (random effects)/ Wald ratio	2	1.02 (0.83-1.26)	0.823721	0.930236	2	0.99 (0.95-1.03)	0.651354	0.875496	5	1.11 (0.94-1.32)	0.227854	0.755663	3	1 (0.96-1.03)	0.889941	0.939606	0	0.429812
	betaine	3141	HMDB00043	247	C00719	C[N+](C)(C)CC(O)=O	Amino Acids	Glycine, Serine and Threonine Metabolism	Sensitivity	Inverse variance weighted (fixed effects)	2	1.02 (0.93-1.13)	0.629847	-	2	0.99 (0.95-1.03)	0.651354	-	5	1.11 (0.97-1.27)	0.131255	-	-	-	-	-	-	-
	betaine	3141	HMDB00043	247	C00719	C[N+](C)(C)CC(O)=O	Amino Acids	Glycine, Serine and Threonine Metabolism	Sensitivity	Inverse variance weighted (multiplicative random effects)	2	1.02 (0.83-1.26)	0.823721	-	2	0.99 (0.98-1)	0.105282	-	5	1.11 (0.94-1.32)	0.227854	-	-	-	-	-	-	-
	betaine	3141	HMDB00043	247	C00719	C[N+](C)(C)CC(O)=O	Amino Acids	Glycine, Serine and Threonine Metabolism	Sensitivity	MR Egger	-	-	-	-	-	-	-	-	5	0.51 (0.24-1.05)	0.164499	-	-	-	-	-	-	-
	betaine	3141	HMDB00043	247	C00719	C[N+](C)(C)CC(O)=O	Amino Acids	Glycine, Serine and Threonine Metabolism	Sensitivity	Weighted median	-	-	-	-	-	-	-	-	5	1.14 (0.95-1.36)	0.150903	-	-	-	-	-	-	-
	betaine	3141	HMDB00043	247	C00719	C[N+](C)(C)CC(O)=O	Amino Acids	Glycine, Serine and Threonine Metabolism	Sensitivity	Weighted mode	-	-	-	-	-	-	-	-	5	1.1 (0.86-1.4)	0.495029	-	-	-	-	-	-	-
	bilirubin (E,E)*	32586	HMDB0240584	5315454	-	CC1=C(C=C)\C(NC1=O)=C/C1=C(C)C(CCC(O)=O)=C(CC2=C(CCC(O)=O)C(C)=C(N2)\C=C2\NC(=O)C(C=C)=C2C)N1	Cofactors and Vitamins	Hemoglobin and Porphyrin Metabolism	Primary	Inverse variance weighted (random effects)/ Wald ratio	2	0.99 (0.92-1.06)	0.789766	0.907538	3	1.03 (1-1.05)	0.0768758	0.29103	8	0.97 (0.89-1.06)	0.54639	0.994872	3	1.02 (0.99-1.04)	0.191287	0.544753	0	0.395176
	bilirubin (E,E)*	32586	HMDB0240584	5315454	-	CC1=C(C=C)\C(NC1=O)=C/C1=C(C)C(CCC(O)=O)=C(CC2=C(CCC(O)=O)C(C)=C(N2)\C=C2\NC(=O)C(C=C)=C2C)N1	Cofactors and Vitamins	Hemoglobin and Porphyrin Metabolism	Sensitivity	Inverse variance weighted (fixed effects)	2	0.99 (0.92-1.06)	0.789766	-	3	1.03 (1-1.05)	0.061577	-	8	0.97 (0.89-1.06)	0.54639	-	-	-	-	-	-	-
	bilirubin (E,E)*	32586	HMDB0240584	5315454	-	CC1=C(C=C)\C(NC1=O)=C/C1=C(C)C(CCC(O)=O)=C(CC2=C(CCC(O)=O)C(C)=C(N2)\C=C2\NC(=O)C(C=C)=C2C)N1	Cofactors and Vitamins	Hemoglobin and Porphyrin Metabolism	Sensitivity	Inverse variance weighted (multiplicative random effects)	2	0.99 (0.98-1.01)	0.199502	-	3	1.03 (1-1.05)	0.0768758	-	8	0.97 (0.92-1.03)	0.37924	-	-	-	-	-	-	-
	bilirubin (E,E)*	32586	HMDB0240584	5315454	-	CC1=C(C=C)\C(NC1=O)=C/C1=C(C)C(CCC(O)=O)=C(CC2=C(CCC(O)=O)C(C)=C(N2)\C=C2\NC(=O)C(C=C)=C2C)N1	Cofactors and Vitamins	Hemoglobin and Porphyrin Metabolism	Sensitivity	MR Egger	-	-	-	-	3	1 (0.87-1.15)	0.968387	-	8	1.02 (0.82-1.27)	0.868413	-	-	-	-	-	-	-
	bilirubin (E,E)*	32586	HMDB0240584	5315454	-	CC1=C(C=C)\C(NC1=O)=C/C1=C(C)C(CCC(O)=O)=C(CC2=C(CCC(O)=O)C(C)=C(N2)\C=C2\NC(=O)C(C=C)=C2C)N1	Cofactors and Vitamins	Hemoglobin and Porphyrin Metabolism	Sensitivity	Weighted median	-	-	-	-	3	1.02 (0.99-1.06)	0.116582	-	8	0.98 (0.89-1.08)	0.711574	-	-	-	-	-	-	-
	bilirubin (E,E)*	32586	HMDB0240584	5315454	-	CC1=C(C=C)\C(NC1=O)=C/C1=C(C)C(CCC(O)=O)=C(CC2=C(CCC(O)=O)C(C)=C(N2)\C=C2\NC(=O)C(C=C)=C2C)N1	Cofactors and Vitamins	Hemoglobin and Porphyrin Metabolism	Sensitivity	Weighted mode	-	-	-	-	3	1.01 (0.98-1.04)	0.566018	-	8	0.98 (0.89-1.09)	0.732888	-	-	-	-	-	-	-
	bilirubin (E,Z or Z,E)*	47886	HMDB00488	5799469	-	CC1=C(C=C)\C(NC1=O)=C\C1=C(C)C(CCC(O)=O)=C(CC2=C(CCC(O)=O)C(C)=C(N2)\C=C2\NC(=O)C(C=C)=C2C)N1	Cofactors and Vitamins	Hemoglobin and Porphyrin Metabolism	Primary	Inverse variance weighted (random effects)/ Wald ratio	-	-	-	-	-	-	-	-	15	0.98 (0.92-1.05)	0.614706	0.994872	-	-	-	-	-	-
	bilirubin (E,Z or Z,E)*	47886	HMDB00488	5799469	-	CC1=C(C=C)\C(NC1=O)=C\C1=C(C)C(CCC(O)=O)=C(CC2=C(CCC(O)=O)C(C)=C(N2)\C=C2\NC(=O)C(C=C)=C2C)N1	Cofactors and Vitamins	Hemoglobin and Porphyrin Metabolism	Sensitivity	Inverse variance weighted (fixed effects)	-	-	-	-	-	-	-	-	15	0.98 (0.92-1.05)	0.614706	-	-	-	-	-	-	-
	bilirubin (E,Z or Z,E)*	47886	HMDB00488	5799469	-	CC1=C(C=C)\C(NC1=O)=C\C1=C(C)C(CCC(O)=O)=C(CC2=C(CCC(O)=O)C(C)=C(N2)\C=C2\NC(=O)C(C=C)=C2C)N1	Cofactors and Vitamins	Hemoglobin and Porphyrin Metabolism	Sensitivity	Inverse variance weighted (multiplicative random effects)	-	-	-	-	-	-	-	-	15	0.98 (0.94-1.03)	0.449997	-	-	-	-	-	-	-
	bilirubin (E,Z or Z,E)*	47886	HMDB00488	5799469	-	CC1=C(C=C)\C(NC1=O)=C\C1=C(C)C(CCC(O)=O)=C(CC2=C(CCC(O)=O)C(C)=C(N2)\C=C2\NC(=O)C(C=C)=C2C)N1	Cofactors and Vitamins	Hemoglobin and Porphyrin Metabolism	Sensitivity	MR Egger	-	-	-	-	-	-	-	-	15	1.02 (0.88-1.19)	0.773214	-	-	-	-	-	-	-
	bilirubin (E,Z or Z,E)*	47886	HMDB00488	5799469	-	CC1=C(C=C)\C(NC1=O)=C\C1=C(C)C(CCC(O)=O)=C(CC2=C(CCC(O)=O)C(C)=C(N2)\C=C2\NC(=O)C(C=C)=C2C)N1	Cofactors and Vitamins	Hemoglobin and Porphyrin Metabolism	Sensitivity	Weighted median	-	-	-	-	-	-	-	-	15	0.98 (0.9-1.07)	0.677963	-	-	-	-	-	-	-
	bilirubin (E,Z or Z,E)*	47886	HMDB00488	5799469	-	CC1=C(C=C)\C(NC1=O)=C\C1=C(C)C(CCC(O)=O)=C(CC2=C(CCC(O)=O)C(C)=C(N2)\C=C2\NC(=O)C(C=C)=C2C)N1	Cofactors and Vitamins	Hemoglobin and Porphyrin Metabolism	Sensitivity	Weighted mode	-	-	-	-	-	-	-	-	15	0.98 (0.9-1.07)	0.721605	-	-	-	-	-	-	-
	bilirubin (Z,Z)	43807	HMDB00054	5280352	C00486	CC1=C(C=C)\C(NC1=O)=C\C1=C(C)C(CCC(O)=O)=C(CC2=C(CCC(O)=O)C(C)=C(N2)\C=C2/NC(=O)C(C=C)=C2C)N1	Cofactors and Vitamins	Hemoglobin and Porphyrin Metabolism	Primary	Inverse variance weighted (random effects)/ Wald ratio	-	-	-	-	-	-	-	-	16	0.97 (0.91-1.04)	0.417585	0.987241	-	-	-	-	-	-
	bilirubin (Z,Z)	43807	HMDB00054	5280352	C00486	CC1=C(C=C)\C(NC1=O)=C\C1=C(C)C(CCC(O)=O)=C(CC2=C(CCC(O)=O)C(C)=C(N2)\C=C2/NC(=O)C(C=C)=C2C)N1	Cofactors and Vitamins	Hemoglobin and Porphyrin Metabolism	Sensitivity	Inverse variance weighted (fixed effects)	-	-	-	-	-	-	-	-	16	0.97 (0.91-1.04)	0.417585	-	-	-	-	-	-	-
	bilirubin (Z,Z)	43807	HMDB00054	5280352	C00486	CC1=C(C=C)\C(NC1=O)=C\C1=C(C)C(CCC(O)=O)=C(CC2=C(CCC(O)=O)C(C)=C(N2)\C=C2/NC(=O)C(C=C)=C2C)N1	Cofactors and Vitamins	Hemoglobin and Porphyrin Metabolism	Sensitivity	Inverse variance weighted (multiplicative random effects)	-	-	-	-	-	-	-	-	16	0.97 (0.92-1.03)	0.324451	-	-	-	-	-	-	-
	bilirubin (Z,Z)	43807	HMDB00054	5280352	C00486	CC1=C(C=C)\C(NC1=O)=C\C1=C(C)C(CCC(O)=O)=C(CC2=C(CCC(O)=O)C(C)=C(N2)\C=C2/NC(=O)C(C=C)=C2C)N1	Cofactors and Vitamins	Hemoglobin and Porphyrin Metabolism	Sensitivity	MR Egger	-	-	-	-	-	-	-	-	16	1.07 (0.94-1.22)	0.33932	-	-	-	-	-	-	-
	bilirubin (Z,Z)	43807	HMDB00054	5280352	C00486	CC1=C(C=C)\C(NC1=O)=C\C1=C(C)C(CCC(O)=O)=C(CC2=C(CCC(O)=O)C(C)=C(N2)\C=C2/NC(=O)C(C=C)=C2C)N1	Cofactors and Vitamins	Hemoglobin and Porphyrin Metabolism	Sensitivity	Weighted median	-	-	-	-	-	-	-	-	16	0.98 (0.91-1.06)	0.654997	-	-	-	-	-	-	-
	bilirubin (Z,Z)	43807	HMDB00054	5280352	C00486	CC1=C(C=C)\C(NC1=O)=C\C1=C(C)C(CCC(O)=O)=C(CC2=C(CCC(O)=O)C(C)=C(N2)\C=C2/NC(=O)C(C=C)=C2C)N1	Cofactors and Vitamins	Hemoglobin and Porphyrin Metabolism	Sensitivity	Weighted mode	-	-	-	-	-	-	-	-	16	0.98 (0.9-1.07)	0.719236	-	-	-	-	-	-	-
	biliverdin	2137	HMDB01008	5353439	C00500	CC1=C(C=C)\C(NC1=O)=C\C1=C(C)C(CCC(O)=O)=C(N1)\C=C1/N=C(/C=C2\NC(=O)C(C=C)=C2C)C(C)=C1CCC(O)=O	Cofactors and Vitamins	Hemoglobin and Porphyrin Metabolism	Primary	Inverse variance weighted (random effects)/ Wald ratio	-	-	-	-	-	-	-	-	11	0.97 (0.89-1.06)	0.496223	0.990446	-	-	-	-	-	-
	biliverdin	2137	HMDB01008	5353439	C00500	CC1=C(C=C)\C(NC1=O)=C\C1=C(C)C(CCC(O)=O)=C(N1)\C=C1/N=C(/C=C2\NC(=O)C(C=C)=C2C)C(C)=C1CCC(O)=O	Cofactors and Vitamins	Hemoglobin and Porphyrin Metabolism	Sensitivity	Inverse variance weighted (fixed effects)	-	-	-	-	-	-	-	-	11	0.97 (0.89-1.06)	0.496223	-	-	-	-	-	-	-
	biliverdin	2137	HMDB01008	5353439	C00500	CC1=C(C=C)\C(NC1=O)=C\C1=C(C)C(CCC(O)=O)=C(N1)\C=C1/N=C(/C=C2\NC(=O)C(C=C)=C2C)C(C)=C1CCC(O)=O	Cofactors and Vitamins	Hemoglobin and Porphyrin Metabolism	Sensitivity	Inverse variance weighted (multiplicative random effects)	-	-	-	-	-	-	-	-	11	0.97 (0.92-1.03)	0.334492	-	-	-	-	-	-	-
	biliverdin	2137	HMDB01008	5353439	C00500	CC1=C(C=C)\C(NC1=O)=C\C1=C(C)C(CCC(O)=O)=C(N1)\C=C1/N=C(/C=C2\NC(=O)C(C=C)=C2C)C(C)=C1CCC(O)=O	Cofactors and Vitamins	Hemoglobin and Porphyrin Metabolism	Sensitivity	MR Egger	-	-	-	-	-	-	-	-	11	1.03 (0.84-1.26)	0.801264	-	-	-	-	-	-	-
	biliverdin	2137	HMDB01008	5353439	C00500	CC1=C(C=C)\C(NC1=O)=C\C1=C(C)C(CCC(O)=O)=C(N1)\C=C1/N=C(/C=C2\NC(=O)C(C=C)=C2C)C(C)=C1CCC(O)=O	Cofactors and Vitamins	Hemoglobin and Porphyrin Metabolism	Sensitivity	Weighted median	-	-	-	-	-	-	-	-	11	0.98 (0.89-1.08)	0.651409	-	-	-	-	-	-	-
	biliverdin	2137	HMDB01008	5353439	C00500	CC1=C(C=C)\C(NC1=O)=C\C1=C(C)C(CCC(O)=O)=C(N1)\C=C1/N=C(/C=C2\NC(=O)C(C=C)=C2C)C(C)=C1CCC(O)=O	Cofactors and Vitamins	Hemoglobin and Porphyrin Metabolism	Sensitivity	Weighted mode	-	-	-	-	-	-	-	-	11	0.98 (0.88-1.09)	0.67748	-	-	-	-	-	-	-
	bradykinin, des-arg(9)	34420	HMDB04246	439201	C00306	N[C@@H](CCCNC(N)=N)C(=O)N1CCC[C@H]1C(=O)N1CCC[C@H]1C(=O)NCC(=O)N[C@@H](CC1=CC=CC=C1)C(=O)N[C@@H](CO)C(=O)N1CCC[C@H]1C(=O)N[C@@H](CC1=CC=CC=C1)C(=O)N[C@@H](CCCNC(N)=N)C(O)=O	Peptides	Polypeptide	Primary	Inverse variance weighted (random effects)/ Wald ratio	-	-	-	-	-	-	-	-	2	1.05 (0.88-1.25)	0.561104	0.994872	-	-	-	-	-	-
	bradykinin, des-arg(9)	34420	HMDB04246	439201	C00306	N[C@@H](CCCNC(N)=N)C(=O)N1CCC[C@H]1C(=O)N1CCC[C@H]1C(=O)NCC(=O)N[C@@H](CC1=CC=CC=C1)C(=O)N[C@@H](CO)C(=O)N1CCC[C@H]1C(=O)N[C@@H](CC1=CC=CC=C1)C(=O)N[C@@H](CCCNC(N)=N)C(O)=O	Peptides	Polypeptide	Sensitivity	Inverse variance weighted (fixed effects)	-	-	-	-	-	-	-	-	2	1.05 (0.88-1.25)	0.561104	-	-	-	-	-	-	-
	bradykinin, des-arg(9)	34420	HMDB04246	439201	C00306	N[C@@H](CCCNC(N)=N)C(=O)N1CCC[C@H]1C(=O)N1CCC[C@H]1C(=O)NCC(=O)N[C@@H](CC1=CC=CC=C1)C(=O)N[C@@H](CO)C(=O)N1CCC[C@H]1C(=O)N[C@@H](CC1=CC=CC=C1)C(=O)N[C@@H](CCCNC(N)=N)C(O)=O	Peptides	Polypeptide	Sensitivity	Inverse variance weighted (multiplicative random effects)	-	-	-	-	-	-	-	-	2	1.05 (1-1.11)	0.0571009	-	-	-	-	-	-	-
	butyrylcarnitine (C4)	32412	HMDB02013	439829	C02862	CCCC(=O)O[C@H](CC([O-])=O)C[N+](C)(C)C	Lipids	Fatty Acid Metabolism (also BCAA Metabolism)	Primary	Inverse variance weighted (random effects)/ Wald ratio	-	-	-	-	-	-	-	-	28	0.99 (0.96-1.03)	0.746478	0.994872	-	-	-	-	-	-
	butyrylcarnitine (C4)	32412	HMDB02013	439829	C02862	CCCC(=O)O[C@H](CC([O-])=O)C[N+](C)(C)C	Lipids	Fatty Acid Metabolism (also BCAA Metabolism)	Sensitivity	Inverse variance weighted (fixed effects)	-	-	-	-	-	-	-	-	28	0.99 (0.96-1.03)	0.746478	-	-	-	-	-	-	-
	butyrylcarnitine (C4)	32412	HMDB02013	439829	C02862	CCCC(=O)O[C@H](CC([O-])=O)C[N+](C)(C)C	Lipids	Fatty Acid Metabolism (also BCAA Metabolism)	Sensitivity	Inverse variance weighted (multiplicative random effects)	-	-	-	-	-	-	-	-	28	0.99 (0.96-1.03)	0.730088	-	-	-	-	-	-	-
	butyrylcarnitine (C4)	32412	HMDB02013	439829	C02862	CCCC(=O)O[C@H](CC([O-])=O)C[N+](C)(C)C	Lipids	Fatty Acid Metabolism (also BCAA Metabolism)	Sensitivity	MR Egger	-	-	-	-	-	-	-	-	28	0.95 (0.9-1.01)	0.113726	-	-	-	-	-	-	-
	butyrylcarnitine (C4)	32412	HMDB02013	439829	C02862	CCCC(=O)O[C@H](CC([O-])=O)C[N+](C)(C)C	Lipids	Fatty Acid Metabolism (also BCAA Metabolism)	Sensitivity	Weighted median	-	-	-	-	-	-	-	-	28	0.98 (0.94-1.02)	0.379607	-	-	-	-	-	-	-
	butyrylcarnitine (C4)	32412	HMDB02013	439829	C02862	CCCC(=O)O[C@H](CC([O-])=O)C[N+](C)(C)C	Lipids	Fatty Acid Metabolism (also BCAA Metabolism)	Sensitivity	Weighted mode	-	-	-	-	-	-	-	-	28	0.98 (0.94-1.01)	0.206146	-	-	-	-	-	-	-
	caffeic acid sulfate	53254	HMDB41708	21668705	-	OC(=O)\C=C\C1=CC(O)=C(OS(O)(=O)=O)C=C1	Xenobiotics	Food Component/Plant	Primary	Inverse variance weighted (random effects)/ Wald ratio	-	-	-	-	-	-	-	-	1	0.82 (0.61-1.11)	0.207202	0.727411	-	-	-	-	-	-
	campesterol	33997	HMDB02869	173183	C01789	[H][C@@]1(CC[C@@]2([H])[C@]3([H])CC=C4C[C@@H](O)CC[C@]4(C)[C@@]3([H])CC[C@]12C)[C@H](C)CC[C@@H](C)C(C)C	Lipids	Sterol	Primary	Inverse variance weighted (random effects)/ Wald ratio	-	-	-	-	-	-	-	-	6	1.07 (0.94-1.21)	0.29249	0.860923	-	-	-	-	-	-
	campesterol	33997	HMDB02869	173183	C01789	[H][C@@]1(CC[C@@]2([H])[C@]3([H])CC=C4C[C@@H](O)CC[C@]4(C)[C@@]3([H])CC[C@]12C)[C@H](C)CC[C@@H](C)C(C)C	Lipids	Sterol	Sensitivity	Inverse variance weighted (fixed effects)	-	-	-	-	-	-	-	-	6	1.07 (0.94-1.21)	0.29249	-	-	-	-	-	-	-
	campesterol	33997	HMDB02869	173183	C01789	[H][C@@]1(CC[C@@]2([H])[C@]3([H])CC=C4C[C@@H](O)CC[C@]4(C)[C@@]3([H])CC[C@]12C)[C@H](C)CC[C@@H](C)C(C)C	Lipids	Sterol	Sensitivity	Inverse variance weighted (multiplicative random effects)	-	-	-	-	-	-	-	-	6	1.07 (0.99-1.16)	0.100068	-	-	-	-	-	-	-
	campesterol	33997	HMDB02869	173183	C01789	[H][C@@]1(CC[C@@]2([H])[C@]3([H])CC=C4C[C@@H](O)CC[C@]4(C)[C@@]3([H])CC[C@]12C)[C@H](C)CC[C@@H](C)C(C)C	Lipids	Sterol	Sensitivity	MR Egger	-	-	-	-	-	-	-	-	6	1.07 (0.77-1.47)	0.71668	-	-	-	-	-	-	-
	campesterol	33997	HMDB02869	173183	C01789	[H][C@@]1(CC[C@@]2([H])[C@]3([H])CC=C4C[C@@H](O)CC[C@]4(C)[C@@]3([H])CC[C@]12C)[C@H](C)CC[C@@H](C)C(C)C	Lipids	Sterol	Sensitivity	Weighted median	-	-	-	-	-	-	-	-	6	1.09 (0.94-1.27)	0.268909	-	-	-	-	-	-	-
	campesterol	33997	HMDB02869	173183	C01789	[H][C@@]1(CC[C@@]2([H])[C@]3([H])CC=C4C[C@@H](O)CC[C@]4(C)[C@@]3([H])CC[C@]12C)[C@H](C)CC[C@@H](C)C(C)C	Lipids	Sterol	Sensitivity	Weighted mode	-	-	-	-	-	-	-	-	6	1.1 (0.93-1.32)	0.318705	-	-	-	-	-	-	-
	caproate (6:0)	32489	HMDB00535	8892	C01585	CCCCCC(O)=O	Lipids	Medium Chain Fatty Acid	Primary	Inverse variance weighted (random effects)/ Wald ratio	-	-	-	-	-	-	-	-	3	0.99 (0.73-1.33)	0.944224	0.999021	-	-	-	-	-	-
	caproate (6:0)	32489	HMDB00535	8892	C01585	CCCCCC(O)=O	Lipids	Medium Chain Fatty Acid	Sensitivity	Inverse variance weighted (fixed effects)	-	-	-	-	-	-	-	-	3	0.99 (0.73-1.33)	0.944224	-	-	-	-	-	-	-
	caproate (6:0)	32489	HMDB00535	8892	C01585	CCCCCC(O)=O	Lipids	Medium Chain Fatty Acid	Sensitivity	Inverse variance weighted (multiplicative random effects)	-	-	-	-	-	-	-	-	3	0.99 (0.94-1.04)	0.690094	-	-	-	-	-	-	-
	caproate (6:0)	32489	HMDB00535	8892	C01585	CCCCCC(O)=O	Lipids	Medium Chain Fatty Acid	Sensitivity	MR Egger	-	-	-	-	-	-	-	-	3	1.06 (0.38-2.97)	0.935551	-	-	-	-	-	-	-
	caproate (6:0)	32489	HMDB00535	8892	C01585	CCCCCC(O)=O	Lipids	Medium Chain Fatty Acid	Sensitivity	Weighted median	-	-	-	-	-	-	-	-	3	0.98 (0.71-1.35)	0.901803	-	-	-	-	-	-	-
	caproate (6:0)	32489	HMDB00535	8892	C01585	CCCCCC(O)=O	Lipids	Medium Chain Fatty Acid	Sensitivity	Weighted mode	-	-	-	-	-	-	-	-	3	0.98 (0.72-1.33)	0.905886	-	-	-	-	-	-	-
	caprylate (8:0)	32492	HMDB00482	379	C06423	CCCCCCCC(O)=O	Lipids	Medium Chain Fatty Acid	Primary	Inverse variance weighted (random effects)/ Wald ratio	1	0.92 (0.8-1.06)	0.260223	0.863252	1	0.97 (0.92-1.02)	0.263108	0.55779	2	0.99 (0.8-1.22)	0.926629	0.999021	3	0.97 (0.92-1.01)	0.157422	0.470337	0	0.767409
	caprylate (8:0)	32492	HMDB00482	379	C06423	CCCCCCCC(O)=O	Lipids	Medium Chain Fatty Acid	Sensitivity	Inverse variance weighted (fixed effects)	-	-	-	-	-	-	-	-	2	0.99 (0.8-1.22)	0.926629	-	-	-	-	-	-	-
	caprylate (8:0)	32492	HMDB00482	379	C06423	CCCCCCCC(O)=O	Lipids	Medium Chain Fatty Acid	Sensitivity	Inverse variance weighted (multiplicative random effects)	-	-	-	-	-	-	-	-	2	0.99 (0.93-1.05)	0.751081	-	-	-	-	-	-	-
	carboxyethyl-GABA	40007	HMDB02201	2572	-	OC(=O)CCCNCCC(O)=O	Amino Acids	Glutamate Metabolism	Primary	Inverse variance weighted (random effects)/ Wald ratio	-	-	-	-	-	-	-	-	2	1.07 (0.75-1.54)	0.701082	0.994872	-	-	-	-	-	-
	carboxyethyl-GABA	40007	HMDB02201	2572	-	OC(=O)CCCNCCC(O)=O	Amino Acids	Glutamate Metabolism	Sensitivity	Inverse variance weighted (fixed effects)	-	-	-	-	-	-	-	-	2	1.07 (0.79-1.46)	0.648783	-	-	-	-	-	-	-
	carboxyethyl-GABA	40007	HMDB02201	2572	-	OC(=O)CCCNCCC(O)=O	Amino Acids	Glutamate Metabolism	Sensitivity	Inverse variance weighted (multiplicative random effects)	-	-	-	-	-	-	-	-	2	1.07 (0.75-1.54)	0.701082	-	-	-	-	-	-	-
	carnitine	15500	HMDB00062	10917	C00318	C[N+](C)(C)C[C@H](O)CC(O)=O	Lipids	Carnitine Metabolism	Primary	Inverse variance weighted (random effects)/ Wald ratio	2	1.02 (0.94-1.1)	0.677443	0.878415	2	1 (0.98-1.03)	0.743062	0.909243	12	1.02 (0.93-1.12)	0.624565	0.994872	3	1.01 (0.98-1.03)	0.571181	0.840727	0	0.905179
	carnitine	15500	HMDB00062	10917	C00318	C[N+](C)(C)C[C@H](O)CC(O)=O	Lipids	Carnitine Metabolism	Sensitivity	Inverse variance weighted (fixed effects)	2	1.02 (0.94-1.1)	0.677443	-	2	1 (0.98-1.03)	0.743062	-	12	1.02 (0.93-1.12)	0.624565	-	-	-	-	-	-	-
	carnitine	15500	HMDB00062	10917	C00318	C[N+](C)(C)C[C@H](O)CC(O)=O	Lipids	Carnitine Metabolism	Sensitivity	Inverse variance weighted (multiplicative random effects)	2	1.02 (0.96-1.08)	0.59537	-	2	1 (0.99-1.02)	0.581534	-	12	1.02 (0.99-1.06)	0.203328	-	-	-	-	-	-	-
	carnitine	15500	HMDB00062	10917	C00318	C[N+](C)(C)C[C@H](O)CC(O)=O	Lipids	Carnitine Metabolism	Sensitivity	MR Egger	-	-	-	-	-	-	-	-	12	0.93 (0.72-1.2)	0.593012	-	-	-	-	-	-	-
	carnitine	15500	HMDB00062	10917	C00318	C[N+](C)(C)C[C@H](O)CC(O)=O	Lipids	Carnitine Metabolism	Sensitivity	Weighted median	-	-	-	-	-	-	-	-	12	1.01 (0.91-1.14)	0.798565	-	-	-	-	-	-	-
	carnitine	15500	HMDB00062	10917	C00318	C[N+](C)(C)C[C@H](O)CC(O)=O	Lipids	Carnitine Metabolism	Sensitivity	Weighted mode	-	-	-	-	-	-	-	-	12	0.98 (0.85-1.13)	0.776867	-	-	-	-	-	-	-
	carotene diol (1)	57635	-	-	-	-	Xenobiotics	Food Component/Plant	Primary	Inverse variance weighted (random effects)/ Wald ratio	-	-	-	-	-	-	-	-	2	1 (0.81-1.24)	0.97391	0.999026	-	-	-	-	-	-
	carotene diol (1)	57635	-	-	-	-	Xenobiotics	Food Component/Plant	Sensitivity	Inverse variance weighted (fixed effects)	-	-	-	-	-	-	-	-	2	1 (0.82-1.23)	0.972709	-	-	-	-	-	-	-
	carotene diol (1)	57635	-	-	-	-	Xenobiotics	Food Component/Plant	Sensitivity	Inverse variance weighted (multiplicative random effects)	-	-	-	-	-	-	-	-	2	1 (0.81-1.24)	0.97391	-	-	-	-	-	-	-
	carotene diol (2)	57636	-	-	-	-	Xenobiotics	Food Component/Plant	Primary	Inverse variance weighted (random effects)/ Wald ratio	-	-	-	-	-	-	-	-	2	1.1 (0.87-1.4)	0.415614	0.987241	-	-	-	-	-	-
	carotene diol (2)	57636	-	-	-	-	Xenobiotics	Food Component/Plant	Sensitivity	Inverse variance weighted (fixed effects)	-	-	-	-	-	-	-	-	2	1.1 (0.87-1.4)	0.415614	-	-	-	-	-	-	-
	carotene diol (2)	57636	-	-	-	-	Xenobiotics	Food Component/Plant	Sensitivity	Inverse variance weighted (multiplicative random effects)	-	-	-	-	-	-	-	-	2	1.1 (0.9-1.35)	0.342672	-	-	-	-	-	-	-
	catechol sulfate	35320	HMDB59724	3083879	-	OC1=C(OS(O)(=O)=O)C=CC=C1	Xenobiotics	Benzoate Metabolism	Primary	Inverse variance weighted (random effects)/ Wald ratio	-	-	-	-	1	1.04 (1-1.09)	0.0329516	0.219098	-	-	-	-	-	-	-	-	-	-
	ceramide (d18:2/24:1, d18:1/24:2)*	57443	-	-	-	-	Lipids	Ceramides	Primary	Inverse variance weighted (random effects)/ Wald ratio	-	-	-	-	-	-	-	-	2	0.98 (0.73-1.3)	0.874822	0.997496	-	-	-	-	-	-
	ceramide (d18:2/24:1, d18:1/24:2)*	57443	-	-	-	-	Lipids	Ceramides	Sensitivity	Inverse variance weighted (fixed effects)	-	-	-	-	-	-	-	-	2	0.98 (0.73-1.3)	0.874822	-	-	-	-	-	-	-
	ceramide (d18:2/24:1, d18:1/24:2)*	57443	-	-	-	-	Lipids	Ceramides	Sensitivity	Inverse variance weighted (multiplicative random effects)	-	-	-	-	-	-	-	-	2	0.98 (0.93-1.03)	0.345489	-	-	-	-	-	-	-
	cerotoylcarnitine (C26)*	57516	HMDB06347	53477828	-	CCCCCCCCCCCCCCCCCCCCCCCCCC(=O)OC(CC([O-])=O)C[N+](C)(C)C	Lipids	Fatty Acid Metabolism (Acyl Carnitine)	Primary	Inverse variance weighted (random effects)/ Wald ratio	-	-	-	-	-	-	-	-	2	1.28 (1.01-1.63)	0.0396877	0.269115	-	-	-	-	-	-
	cerotoylcarnitine (C26)*	57516	HMDB06347	53477828	-	CCCCCCCCCCCCCCCCCCCCCCCCCC(=O)OC(CC([O-])=O)C[N+](C)(C)C	Lipids	Fatty Acid Metabolism (Acyl Carnitine)	Sensitivity	Inverse variance weighted (fixed effects)	-	-	-	-	-	-	-	-	2	1.28 (1.01-1.63)	0.0396877	-	-	-	-	-	-	-
	cerotoylcarnitine (C26)*	57516	HMDB06347	53477828	-	CCCCCCCCCCCCCCCCCCCCCCCCCC(=O)OC(CC([O-])=O)C[N+](C)(C)C	Lipids	Fatty Acid Metabolism (Acyl Carnitine)	Sensitivity	Inverse variance weighted (multiplicative random effects)	-	-	-	-	-	-	-	-	2	1.28 (1.07-1.54)	0.00677952	-	-	-	-	-	-	-
	chiro-inositol	37112	HMDB34220	-	C19891	-	Lipids	Inositol Metabolism	Primary	Inverse variance weighted (random effects)/ Wald ratio	-	-	-	-	-	-	-	-	1	0.9 (0.68-1.2)	0.472311	0.987241	-	-	-	-	-	-
	cholesterol	63	HMDB00067	11025495	C00187	[H][C@@]1(CC[C@@]2([H])[C@]3([H])CC=C4C[C@@H](O)CC[C@]4(C)[C@@]3([H])CC[C@]12C)[C@H](C)CCCC(C)C	Lipids	Sterol	Primary	Inverse variance weighted (random effects)/ Wald ratio	1	1.04 (0.91-1.2)	0.539831	0.863348	-	-	-	-	5	0.94 (0.78-1.14)	0.526329	0.994872	2	1.01 (0.9-1.12)	0.90174	0.939606	0	0.382686
	cholesterol	63	HMDB00067	11025495	C00187	[H][C@@]1(CC[C@@]2([H])[C@]3([H])CC=C4C[C@@H](O)CC[C@]4(C)[C@@]3([H])CC[C@]12C)[C@H](C)CCCC(C)C	Lipids	Sterol	Sensitivity	Inverse variance weighted (fixed effects)	-	-	-	-	-	-	-	-	5	0.94 (0.78-1.14)	0.526329	-	-	-	-	-	-	-
	cholesterol	63	HMDB00067	11025495	C00187	[H][C@@]1(CC[C@@]2([H])[C@]3([H])CC=C4C[C@@H](O)CC[C@]4(C)[C@@]3([H])CC[C@]12C)[C@H](C)CCCC(C)C	Lipids	Sterol	Sensitivity	Inverse variance weighted (multiplicative random effects)	-	-	-	-	-	-	-	-	5	0.94 (0.82-1.08)	0.401736	-	-	-	-	-	-	-
	cholesterol	63	HMDB00067	11025495	C00187	[H][C@@]1(CC[C@@]2([H])[C@]3([H])CC=C4C[C@@H](O)CC[C@]4(C)[C@@]3([H])CC[C@]12C)[C@H](C)CCCC(C)C	Lipids	Sterol	Sensitivity	MR Egger	-	-	-	-	-	-	-	-	5	0.62 (0.27-1.39)	0.328195	-	-	-	-	-	-	-
	cholesterol	63	HMDB00067	11025495	C00187	[H][C@@]1(CC[C@@]2([H])[C@]3([H])CC=C4C[C@@H](O)CC[C@]4(C)[C@@]3([H])CC[C@]12C)[C@H](C)CCCC(C)C	Lipids	Sterol	Sensitivity	Weighted median	-	-	-	-	-	-	-	-	5	1.01 (0.81-1.27)	0.905248	-	-	-	-	-	-	-
	cholesterol	63	HMDB00067	11025495	C00187	[H][C@@]1(CC[C@@]2([H])[C@]3([H])CC=C4C[C@@H](O)CC[C@]4(C)[C@@]3([H])CC[C@]12C)[C@H](C)CCCC(C)C	Lipids	Sterol	Sensitivity	Weighted mode	-	-	-	-	-	-	-	-	5	1.05 (0.77-1.43)	0.770014	-	-	-	-	-	-	-
	choline	15506	HMDB00097	305	C00114	C[N+](C)(C)CCO	Lipids	Phospholipid Metabolism	Primary	Inverse variance weighted (random effects)/ Wald ratio	1	0.95 (0.82-1.09)	0.460787	0.863252	-	-	-	-	1	1.2 (0.44-3.32)	0.71851	0.994872	2	0.95 (0.82-1.1)	0.497238	0.80765	0	0.644382
	choline phosphate	34396	HMDB01565	1014	C00588	C[N+](C)(C)CCOP(O)(O)=O	Lipids	Phospholipid Metabolism	Primary	Inverse variance weighted (random effects)/ Wald ratio	-	-	-	-	-	-	-	-	1	0.73 (0.41-1.31)	0.294363	0.860923	-	-	-	-	-	-
	cinnamoylglycine	38637	HMDB11621	709625	-	OC(=O)CNC(=O)\C=C\C1=CC=CC=C1	Xenobiotics	Food Component/Plant	Primary	Inverse variance weighted (random effects)/ Wald ratio	-	-	-	-	-	-	-	-	1	0.89 (0.66-1.2)	0.450025	0.987241	-	-	-	-	-	-
	cis-4-decenoylcarnitine (C10:1)	38178	-	-	-	-	Lipids	Fatty Acid Metabolism (Acyl Carnitine)	Primary	Inverse variance weighted (random effects)/ Wald ratio	-	-	-	-	-	-	-	-	3	1.02 (0.89-1.18)	0.764674	0.994872	-	-	-	-	-	-
	cis-4-decenoylcarnitine (C10:1)	38178	-	-	-	-	Lipids	Fatty Acid Metabolism (Acyl Carnitine)	Sensitivity	Inverse variance weighted (fixed effects)	-	-	-	-	-	-	-	-	3	1.02 (0.89-1.18)	0.764674	-	-	-	-	-	-	-
	cis-4-decenoylcarnitine (C10:1)	38178	-	-	-	-	Lipids	Fatty Acid Metabolism (Acyl Carnitine)	Sensitivity	Inverse variance weighted (multiplicative random effects)	-	-	-	-	-	-	-	-	3	1.02 (0.95-1.09)	0.534914	-	-	-	-	-	-	-
	cis-4-decenoylcarnitine (C10:1)	38178	-	-	-	-	Lipids	Fatty Acid Metabolism (Acyl Carnitine)	Sensitivity	MR Egger	-	-	-	-	-	-	-	-	3	0.87 (0.44-1.73)	0.764186	-	-	-	-	-	-	-
	cis-4-decenoylcarnitine (C10:1)	38178	-	-	-	-	Lipids	Fatty Acid Metabolism (Acyl Carnitine)	Sensitivity	Weighted median	-	-	-	-	-	-	-	-	3	1 (0.86-1.16)	0.982211	-	-	-	-	-	-	-
	cis-4-decenoylcarnitine (C10:1)	38178	-	-	-	-	Lipids	Fatty Acid Metabolism (Acyl Carnitine)	Sensitivity	Weighted mode	-	-	-	-	-	-	-	-	3	1 (0.84-1.19)	0.989745	-	-	-	-	-	-	-
	citrate	1564	HMDB00094	311	C00158	OC(=O)CC(O)(CC(O)=O)C(O)=O	Energy	TCA Cycle	Primary	Inverse variance weighted (random effects)/ Wald ratio	3	0.99 (0.84-1.17)	0.929338	0.972499	-	-	-	-	-	-	-	-	-	-	-	-	-	-
	citrate	1564	HMDB00094	311	C00158	OC(=O)CC(O)(CC(O)=O)C(O)=O	Energy	TCA Cycle	Sensitivity	Inverse variance weighted (fixed effects)	3	0.99 (0.91-1.09)	0.870998	-	-	-	-	-	-	-	-	-	-	-	-	-	-	-
	citrate	1564	HMDB00094	311	C00158	OC(=O)CC(O)(CC(O)=O)C(O)=O	Energy	TCA Cycle	Sensitivity	Inverse variance weighted (multiplicative random effects)	3	0.99 (0.84-1.17)	0.929338	-	-	-	-	-	-	-	-	-	-	-	-	-	-	-
	citrate	1564	HMDB00094	311	C00158	OC(=O)CC(O)(CC(O)=O)C(O)=O	Energy	TCA Cycle	Sensitivity	MR Egger	3	0.65 (0.42-1)	0.300307	-	-	-	-	-	-	-	-	-	-	-	-	-	-	-
	citrate	1564	HMDB00094	311	C00158	OC(=O)CC(O)(CC(O)=O)C(O)=O	Energy	TCA Cycle	Sensitivity	Weighted median	3	0.98 (0.87-1.12)	0.797399	-	-	-	-	-	-	-	-	-	-	-	-	-	-	-
	citrate	1564	HMDB00094	311	C00158	OC(=O)CC(O)(CC(O)=O)C(O)=O	Energy	TCA Cycle	Sensitivity	Weighted mode	3	0.96 (0.77-1.18)	0.713351	-	-	-	-	-	-	-	-	-	-	-	-	-	-	-
	cortisol	1712	HMDB00063	5754	C00735	[H][C@@]12CC[C@](O)(C(=O)CO)[C@@]1(C)C[C@H](O)[C@@]1([H])[C@@]2([H])CCC2=CC(=O)CC[C@]12C	Lipids	Corticosteroids	Primary	Inverse variance weighted (random effects)/ Wald ratio	1	0.93 (0.79-1.08)	0.349053	0.863252	-	-	-	-	-	-	-	-	-	-	-	-	-	-
	cotinine	553	HMDB01046	408	-	CN1C(CCC1=O)C1=CN=CC=C1	Xenobiotics	Tobacco Metabolite	Primary	Inverse variance weighted (random effects)/ Wald ratio	-	-	-	-	-	-	-	-	1	1.01 (0.68-1.5)	0.948769	0.999021	-	-	-	-	-	-
	creatine	27718	HMDB00064	586	C00300	CN(CC(O)=O)C(N)=N	Amino Acids	Creatine Metabolism	Primary	Inverse variance weighted (random effects)/ Wald ratio	1	1.1 (0.98-1.24)	0.11289	0.863252	1	1.01 (0.96-1.06)	0.606357	0.856985	2	1.03 (0.67-1.59)	0.888779	0.997496	3	1.03 (0.98-1.07)	0.273851	0.640985	0	0.449124
	creatine	27718	HMDB00064	586	C00300	CN(CC(O)=O)C(N)=N	Amino Acids	Creatine Metabolism	Sensitivity	Inverse variance weighted (fixed effects)	-	-	-	-	-	-	-	-	2	1.03 (0.81-1.31)	0.798565	-	-	-	-	-	-	-
	creatine	27718	HMDB00064	586	C00300	CN(CC(O)=O)C(N)=N	Amino Acids	Creatine Metabolism	Sensitivity	Inverse variance weighted (multiplicative random effects)	-	-	-	-	-	-	-	-	2	1.03 (0.67-1.59)	0.888779	-	-	-	-	-	-	-
	creatinine	513	HMDB00562	588	C00791	CN1CC(=O)NC1=N	Amino Acids	Creatine Metabolism	Primary	Inverse variance weighted (random effects)/ Wald ratio	-	-	-	-	-	-	-	-	2	0.96 (0.62-1.47)	0.833428	0.997496	-	-	-	-	-	-
	creatinine	513	HMDB00562	588	C00791	CN1CC(=O)NC1=N	Amino Acids	Creatine Metabolism	Sensitivity	Inverse variance weighted (fixed effects)	-	-	-	-	-	-	-	-	2	0.96 (0.62-1.47)	0.833428	-	-	-	-	-	-	-
	creatinine	513	HMDB00562	588	C00791	CN1CC(=O)NC1=N	Amino Acids	Creatine Metabolism	Sensitivity	Inverse variance weighted (multiplicative random effects)	-	-	-	-	-	-	-	-	2	0.96 (0.68-1.35)	0.793313	-	-	-	-	-	-	-
	cys-gly, oxidized	18368	-	333293	-	-	Amino Acids	Glutathione Metabolism	Primary	Inverse variance weighted (random effects)/ Wald ratio	-	-	-	-	-	-	-	-	34	0.95 (0.91-1)	0.0368441	0.253303	-	-	-	-	-	-
	cys-gly, oxidized	18368	-	333293	-	-	Amino Acids	Glutathione Metabolism	Sensitivity	Inverse variance weighted (fixed effects)	-	-	-	-	-	-	-	-	34	0.95 (0.91-0.99)	0.0271429	-	-	-	-	-	-	-
	cys-gly, oxidized	18368	-	333293	-	-	Amino Acids	Glutathione Metabolism	Sensitivity	Inverse variance weighted (multiplicative random effects)	-	-	-	-	-	-	-	-	34	0.95 (0.91-1)	0.0368441	-	-	-	-	-	-	-
	cys-gly, oxidized	18368	-	333293	-	-	Amino Acids	Glutathione Metabolism	Sensitivity	MR Egger	-	-	-	-	-	-	-	-	34	0.95 (0.86-1.04)	0.272465	-	-	-	-	-	-	-
	cys-gly, oxidized	18368	-	333293	-	-	Amino Acids	Glutathione Metabolism	Sensitivity	Weighted median	-	-	-	-	-	-	-	-	34	0.95 (0.9-1.01)	0.0863127	-	-	-	-	-	-	-
	cys-gly, oxidized	18368	-	333293	-	-	Amino Acids	Glutathione Metabolism	Sensitivity	Weighted mode	-	-	-	-	-	-	-	-	34	0.94 (0.89-0.99)	0.0355437	-	-	-	-	-	-	-
	cystathionine	15705	HMDB00099	439258	C02291	N[C@@H](CCSC[C@H](N)C(O)=O)C(O)=O	Amino Acids	Methionine, Cysteine, SAM and Taurine Metabolism	Primary	Inverse variance weighted (random effects)/ Wald ratio	-	-	-	-	-	-	-	-	1	1.18 (0.77-1.81)	0.435256	0.987241	-	-	-	-	-	-
	cysteine	1868	HMDB00574	5862	C00097	N[C@@H](CS)C(O)=O	Amino Acids	Methionine, Cysteine, SAM and Taurine Metabolism	Primary	Inverse variance weighted (random effects)/ Wald ratio	-	-	-	-	-	-	-	-	1	2.15 (1.1-4.21)	0.0250412	0.187809	-	-	-	-	-	-
	cysteine-glutathione disulfide	35159	HMDB00656	4247235	-	N[C@@H](CCC(=O)N[C@@H](CSSCC(N)C(O)=O)C(=O)NCC(O)=O)C(O)=O	Amino Acids	Glutathione Metabolism	Primary	Inverse variance weighted (random effects)/ Wald ratio	-	-	-	-	-	-	-	-	9	1.07 (0.87-1.32)	0.522494	0.994872	-	-	-	-	-	-
	cysteine-glutathione disulfide	35159	HMDB00656	4247235	-	N[C@@H](CCC(=O)N[C@@H](CSSCC(N)C(O)=O)C(=O)NCC(O)=O)C(O)=O	Amino Acids	Glutathione Metabolism	Sensitivity	Inverse variance weighted (fixed effects)	-	-	-	-	-	-	-	-	9	1.07 (0.94-1.22)	0.323965	-	-	-	-	-	-	-
	cysteine-glutathione disulfide	35159	HMDB00656	4247235	-	N[C@@H](CCC(=O)N[C@@H](CSSCC(N)C(O)=O)C(=O)NCC(O)=O)C(O)=O	Amino Acids	Glutathione Metabolism	Sensitivity	Inverse variance weighted (multiplicative random effects)	-	-	-	-	-	-	-	-	9	1.07 (0.87-1.32)	0.522494	-	-	-	-	-	-	-
	cysteine-glutathione disulfide	35159	HMDB00656	4247235	-	N[C@@H](CCC(=O)N[C@@H](CSSCC(N)C(O)=O)C(=O)NCC(O)=O)C(O)=O	Amino Acids	Glutathione Metabolism	Sensitivity	MR Egger	-	-	-	-	-	-	-	-	9	1.08 (0.61-1.93)	0.799084	-	-	-	-	-	-	-
	cysteine-glutathione disulfide	35159	HMDB00656	4247235	-	N[C@@H](CCC(=O)N[C@@H](CSSCC(N)C(O)=O)C(=O)NCC(O)=O)C(O)=O	Amino Acids	Glutathione Metabolism	Sensitivity	Weighted median	-	-	-	-	-	-	-	-	9	1.07 (0.9-1.27)	0.455371	-	-	-	-	-	-	-
	cysteine-glutathione disulfide	35159	HMDB00656	4247235	-	N[C@@H](CCC(=O)N[C@@H](CSSCC(N)C(O)=O)C(=O)NCC(O)=O)C(O)=O	Amino Acids	Glutathione Metabolism	Sensitivity	Weighted mode	-	-	-	-	-	-	-	-	9	1.09 (0.9-1.31)	0.414726	-	-	-	-	-	-	-
	cysteinylglycine	35637	HMDB00078	439498	C01419	N[C@@H](CS)C(=O)NCC(O)=O	Amino Acids	Glutathione Metabolism	Primary	Inverse variance weighted (random effects)/ Wald ratio	-	-	-	-	-	-	-	-	8	0.88 (0.78-0.98)	0.0198998	0.157566	-	-	-	-	-	-
	cysteinylglycine	35637	HMDB00078	439498	C01419	N[C@@H](CS)C(=O)NCC(O)=O	Amino Acids	Glutathione Metabolism	Sensitivity	Inverse variance weighted (fixed effects)	-	-	-	-	-	-	-	-	8	0.88 (0.78-0.98)	0.0198998	-	-	-	-	-	-	-
	cysteinylglycine	35637	HMDB00078	439498	C01419	N[C@@H](CS)C(=O)NCC(O)=O	Amino Acids	Glutathione Metabolism	Sensitivity	Inverse variance weighted (multiplicative random effects)	-	-	-	-	-	-	-	-	8	0.88 (0.79-0.97)	0.0101772	-	-	-	-	-	-	-
	cysteinylglycine	35637	HMDB00078	439498	C01419	N[C@@H](CS)C(=O)NCC(O)=O	Amino Acids	Glutathione Metabolism	Sensitivity	MR Egger	-	-	-	-	-	-	-	-	8	0.92 (0.68-1.25)	0.601093	-	-	-	-	-	-	-
	cysteinylglycine	35637	HMDB00078	439498	C01419	N[C@@H](CS)C(=O)NCC(O)=O	Amino Acids	Glutathione Metabolism	Sensitivity	Weighted median	-	-	-	-	-	-	-	-	8	0.88 (0.77-1.02)	0.080349	-	-	-	-	-	-	-
	cysteinylglycine	35637	HMDB00078	439498	C01419	N[C@@H](CS)C(=O)NCC(O)=O	Amino Acids	Glutathione Metabolism	Sensitivity	Weighted mode	-	-	-	-	-	-	-	-	8	0.89 (0.76-1.03)	0.164425	-	-	-	-	-	-	-
	cytidine	514	HMDB00089	6175	C00475	NC1=NC(=O)N(C=C1)[C@@H]1O[C@H](CO)[C@@H](O)[C@H]1O	Nucleotides	Pyrimidine Metabolism, Cytidine containing	Primary	Inverse variance weighted (random effects)/ Wald ratio	-	-	-	-	-	-	-	-	4	1.23 (0.96-1.58)	0.101019	0.510352	-	-	-	-	-	-
	cytidine	514	HMDB00089	6175	C00475	NC1=NC(=O)N(C=C1)[C@@H]1O[C@H](CO)[C@@H](O)[C@H]1O	Nucleotides	Pyrimidine Metabolism, Cytidine containing	Sensitivity	Inverse variance weighted (fixed effects)	-	-	-	-	-	-	-	-	4	1.23 (0.96-1.58)	0.101019	-	-	-	-	-	-	-
	cytidine	514	HMDB00089	6175	C00475	NC1=NC(=O)N(C=C1)[C@@H]1O[C@H](CO)[C@@H](O)[C@H]1O	Nucleotides	Pyrimidine Metabolism, Cytidine containing	Sensitivity	Inverse variance weighted (multiplicative random effects)	-	-	-	-	-	-	-	-	4	1.23 (1.04-1.47)	0.0188125	-	-	-	-	-	-	-
	cytidine	514	HMDB00089	6175	C00475	NC1=NC(=O)N(C=C1)[C@@H]1O[C@H](CO)[C@@H](O)[C@H]1O	Nucleotides	Pyrimidine Metabolism, Cytidine containing	Sensitivity	MR Egger	-	-	-	-	-	-	-	-	4	1.45 (0.85-2.46)	0.304073	-	-	-	-	-	-	-
	cytidine	514	HMDB00089	6175	C00475	NC1=NC(=O)N(C=C1)[C@@H]1O[C@H](CO)[C@@H](O)[C@H]1O	Nucleotides	Pyrimidine Metabolism, Cytidine containing	Sensitivity	Weighted median	-	-	-	-	-	-	-	-	4	1.15 (0.85-1.56)	0.351262	-	-	-	-	-	-	-
	cytidine	514	HMDB00089	6175	C00475	NC1=NC(=O)N(C=C1)[C@@H]1O[C@H](CO)[C@@H](O)[C@H]1O	Nucleotides	Pyrimidine Metabolism, Cytidine containing	Sensitivity	Weighted mode	-	-	-	-	-	-	-	-	4	1.14 (0.8-1.61)	0.517294	-	-	-	-	-	-	-
	decanoylcarnitine (C10)	33941	HMDB00651	10245190	C03299	CCCCCCCCCC(=O)O[C@H](CC([O-])=O)C[N+](C)(C)C	Lipids	Fatty Acid Metabolism (Acyl Carnitine)	Primary	Inverse variance weighted (random effects)/ Wald ratio	2	0.96 (0.89-1.04)	0.293647	0.863252	2	0.99 (0.96-1.02)	0.637687	0.875496	3	1.05 (0.88-1.24)	0.593311	0.994872	3	0.99 (0.96-1.02)	0.463934	0.78929	0	0.584686
	decanoylcarnitine (C10)	33941	HMDB00651	10245190	C03299	CCCCCCCCCC(=O)O[C@H](CC([O-])=O)C[N+](C)(C)C	Lipids	Fatty Acid Metabolism (Acyl Carnitine)	Sensitivity	Inverse variance weighted (fixed effects)	2	0.96 (0.89-1.04)	0.293647	-	2	0.99 (0.97-1.02)	0.596362	-	3	1.05 (0.88-1.24)	0.593311	-	-	-	-	-	-	-
	decanoylcarnitine (C10)	33941	HMDB00651	10245190	C03299	CCCCCCCCCC(=O)O[C@H](CC([O-])=O)C[N+](C)(C)C	Lipids	Fatty Acid Metabolism (Acyl Carnitine)	Sensitivity	Inverse variance weighted (multiplicative random effects)	2	0.96 (0.92-1.01)	0.0907896	-	2	0.99 (0.96-1.02)	0.637687	-	3	1.05 (0.98-1.12)	0.162333	-	-	-	-	-	-	-
	decanoylcarnitine (C10)	33941	HMDB00651	10245190	C03299	CCCCCCCCCC(=O)O[C@H](CC([O-])=O)C[N+](C)(C)C	Lipids	Fatty Acid Metabolism (Acyl Carnitine)	Sensitivity	MR Egger	-	-	-	-	-	-	-	-	3	1.19 (0.49-2.91)	0.770876	-	-	-	-	-	-	-
	decanoylcarnitine (C10)	33941	HMDB00651	10245190	C03299	CCCCCCCCCC(=O)O[C@H](CC([O-])=O)C[N+](C)(C)C	Lipids	Fatty Acid Metabolism (Acyl Carnitine)	Sensitivity	Weighted median	-	-	-	-	-	-	-	-	3	1.04 (0.86-1.25)	0.690585	-	-	-	-	-	-	-
	decanoylcarnitine (C10)	33941	HMDB00651	10245190	C03299	CCCCCCCCCC(=O)O[C@H](CC([O-])=O)C[N+](C)(C)C	Lipids	Fatty Acid Metabolism (Acyl Carnitine)	Sensitivity	Weighted mode	-	-	-	-	-	-	-	-	3	1.01 (0.83-1.24)	0.900821	-	-	-	-	-	-	-
	dehydroisoandrosterone sulfate (DHEA-S)	32425	HMDB01032	12594	C04555	[H][C@@]12CCC(=O)[C@@]1(C)CC[C@@]1([H])[C@@]2([H])CC=C2C[C@H](CC[C@]12C)OS(O)(=O)=O	Lipids	Androgenic Steroids	Primary	Inverse variance weighted (random effects)/ Wald ratio	-	-	-	-	2	1.01 (0.96-1.05)	0.780576	0.909243	2	0.86 (0.48-1.57)	0.630825	0.994872	2	1.01 (0.96-1.05)	0.807661	0.939606	0	0.617592
	dehydroisoandrosterone sulfate (DHEA-S)	32425	HMDB01032	12594	C04555	[H][C@@]12CCC(=O)[C@@]1(C)CC[C@@]1([H])[C@@]2([H])CC=C2C[C@H](CC[C@]12C)OS(O)(=O)=O	Lipids	Androgenic Steroids	Sensitivity	Inverse variance weighted (fixed effects)	-	-	-	-	2	1.01 (0.96-1.05)	0.780576	-	2	0.86 (0.63-1.18)	0.358061	-	-	-	-	-	-	-
	dehydroisoandrosterone sulfate (DHEA-S)	32425	HMDB01032	12594	C04555	[H][C@@]12CCC(=O)[C@@]1(C)CC[C@@]1([H])[C@@]2([H])CC=C2C[C@H](CC[C@]12C)OS(O)(=O)=O	Lipids	Androgenic Steroids	Sensitivity	Inverse variance weighted (multiplicative random effects)	-	-	-	-	2	1.01 (1-1.01)	0.117218	-	2	0.86 (0.48-1.57)	0.630825	-	-	-	-	-	-	-
	deoxycarnitine	36747	HMDB01161	134	C01181	C[N+](C)(C)CCCC([O-])=O	Lipids	Carnitine Metabolism	Primary	Inverse variance weighted (random effects)/ Wald ratio	3	1.02 (0.95-1.09)	0.591342	0.870677	1	1.04 (1-1.08)	0.0454886	0.244771	13	1.02 (0.93-1.12)	0.731178	0.994872	3	1.03 (1-1.07)	0.0445417	0.195479	0	0.830834
	deoxycarnitine	36747	HMDB01161	134	C01181	C[N+](C)(C)CCCC([O-])=O	Lipids	Carnitine Metabolism	Sensitivity	Inverse variance weighted (fixed effects)	3	1.02 (0.95-1.09)	0.591342	-	-	-	-	-	13	1.02 (0.93-1.12)	0.731178	-	-	-	-	-	-	-
	deoxycarnitine	36747	HMDB01161	134	C01181	C[N+](C)(C)CCCC([O-])=O	Lipids	Carnitine Metabolism	Sensitivity	Inverse variance weighted (multiplicative random effects)	3	1.02 (0.97-1.07)	0.420702	-	-	-	-	-	13	1.02 (0.94-1.1)	0.682294	-	-	-	-	-	-	-
	deoxycarnitine	36747	HMDB01161	134	C01181	C[N+](C)(C)CCCC([O-])=O	Lipids	Carnitine Metabolism	Sensitivity	MR Egger	3	0.96 (0.59-1.56)	0.894264	-	-	-	-	-	13	1.04 (0.82-1.33)	0.735761	-	-	-	-	-	-	-
	deoxycarnitine	36747	HMDB01161	134	C01181	C[N+](C)(C)CCCC([O-])=O	Lipids	Carnitine Metabolism	Sensitivity	Weighted median	3	1.01 (0.93-1.1)	0.760126	-	-	-	-	-	13	1.03 (0.91-1.17)	0.652138	-	-	-	-	-	-	-
	deoxycarnitine	36747	HMDB01161	134	C01181	C[N+](C)(C)CCCC([O-])=O	Lipids	Carnitine Metabolism	Sensitivity	Weighted mode	3	1 (0.9-1.1)	0.94329	-	-	-	-	-	13	1.03 (0.9-1.17)	0.6727	-	-	-	-	-	-	-
	diacylglycerol (16:1/18:2 [2], 16:0/18:3 [1])*	54966	-	-	-	-	Lipids	Diacylglycerol	Primary	Inverse variance weighted (random effects)/ Wald ratio	-	-	-	-	-	-	-	-	1	0.97 (0.7-1.36)	0.874875	0.997496	-	-	-	-	-	-
	dihomo-linolenate (20:3n3 or n6)	35718	HMDB02925	5280581	C03242	CCCCC\C=C/C\C=C/C\C=C/CCCCCCC(O)=O	Lipids	Polyunsaturated Fatty Acid (n3 and n6)	Primary	Inverse variance weighted (random effects)/ Wald ratio	2	1.04 (0.94-1.15)	0.505487	0.863348	1	0.97 (0.91-1.02)	0.235305	0.530689	2	0.93 (0.55-1.57)	0.778823	0.994872	3	0.98 (0.94-1.03)	0.455377	0.78929	0	0.503215
	dihomo-linolenate (20:3n3 or n6)	35718	HMDB02925	5280581	C03242	CCCCC\C=C/C\C=C/C\C=C/CCCCCCC(O)=O	Lipids	Polyunsaturated Fatty Acid (n3 and n6)	Sensitivity	Inverse variance weighted (fixed effects)	2	1.04 (0.95-1.13)	0.439154	-	-	-	-	-	2	0.93 (0.72-1.19)	0.551467	-	-	-	-	-	-	-
	dihomo-linolenate (20:3n3 or n6)	35718	HMDB02925	5280581	C03242	CCCCC\C=C/C\C=C/C\C=C/CCCCCCC(O)=O	Lipids	Polyunsaturated Fatty Acid (n3 and n6)	Sensitivity	Inverse variance weighted (multiplicative random effects)	2	1.04 (0.94-1.15)	0.505487	-	-	-	-	-	2	0.93 (0.55-1.57)	0.778823	-	-	-	-	-	-	-
	dihomo-linolenoyl-choline	53262	-	-	-	-	Lipids	Fatty Acid Metabolism (Acyl Choline)	Primary	Inverse variance weighted (random effects)/ Wald ratio	-	-	-	-	-	-	-	-	1	1.88 (0.57-6.18)	0.296589	0.860923	-	-	-	-	-	-
	dihydroorotate	601	HMDB03349	648	C00337	OC(=O)C1CC(=O)NC(=O)N1	Nucleotides	Pyrimidine Metabolism, Orotate containing	Primary	Inverse variance weighted (random effects)/ Wald ratio	-	-	-	-	-	-	-	-	4	1.08 (0.91-1.28)	0.389252	0.977965	-	-	-	-	-	-
	dihydroorotate	601	HMDB03349	648	C00337	OC(=O)C1CC(=O)NC(=O)N1	Nucleotides	Pyrimidine Metabolism, Orotate containing	Sensitivity	Inverse variance weighted (fixed effects)	-	-	-	-	-	-	-	-	4	1.08 (0.91-1.28)	0.389252	-	-	-	-	-	-	-
	dihydroorotate	601	HMDB03349	648	C00337	OC(=O)C1CC(=O)NC(=O)N1	Nucleotides	Pyrimidine Metabolism, Orotate containing	Sensitivity	Inverse variance weighted (multiplicative random effects)	-	-	-	-	-	-	-	-	4	1.08 (1.05-1.11)	4.02882e-07	-	-	-	-	-	-	-
	dihydroorotate	601	HMDB03349	648	C00337	OC(=O)C1CC(=O)NC(=O)N1	Nucleotides	Pyrimidine Metabolism, Orotate containing	Sensitivity	MR Egger	-	-	-	-	-	-	-	-	4	1.15 (0.56-2.34)	0.73899	-	-	-	-	-	-	-
	dihydroorotate	601	HMDB03349	648	C00337	OC(=O)C1CC(=O)NC(=O)N1	Nucleotides	Pyrimidine Metabolism, Orotate containing	Sensitivity	Weighted median	-	-	-	-	-	-	-	-	4	1.08 (0.89-1.31)	0.415448	-	-	-	-	-	-	-
	dihydroorotate	601	HMDB03349	648	C00337	OC(=O)C1CC(=O)NC(=O)N1	Nucleotides	Pyrimidine Metabolism, Orotate containing	Sensitivity	Weighted mode	-	-	-	-	-	-	-	-	4	1.08 (0.85-1.38)	0.568682	-	-	-	-	-	-	-
	dimethylarginine (SDMA + ADMA)	36808	HMDB01539	123831	C03626	N[C@@H](CCC\N=C(/N)N(C)C)C(O)=O	Amino Acids	Urea cycle; Arginine and Proline Metabolism	Primary	Inverse variance weighted (random effects)/ Wald ratio	-	-	-	-	-	-	-	-	4	0.87 (0.7-1.1)	0.243495	0.787777	-	-	-	-	-	-
	dimethylarginine (SDMA + ADMA)	36808	HMDB01539	123831	C03626	N[C@@H](CCC\N=C(/N)N(C)C)C(O)=O	Amino Acids	Urea cycle; Arginine and Proline Metabolism	Sensitivity	Inverse variance weighted (fixed effects)	-	-	-	-	-	-	-	-	4	0.87 (0.75-1.01)	0.0755747	-	-	-	-	-	-	-
	dimethylarginine (SDMA + ADMA)	36808	HMDB01539	123831	C03626	N[C@@H](CCC\N=C(/N)N(C)C)C(O)=O	Amino Acids	Urea cycle; Arginine and Proline Metabolism	Sensitivity	Inverse variance weighted (multiplicative random effects)	-	-	-	-	-	-	-	-	4	0.87 (0.7-1.1)	0.243495	-	-	-	-	-	-	-
	dimethylarginine (SDMA + ADMA)	36808	HMDB01539	123831	C03626	N[C@@H](CCC\N=C(/N)N(C)C)C(O)=O	Amino Acids	Urea cycle; Arginine and Proline Metabolism	Sensitivity	MR Egger	-	-	-	-	-	-	-	-	4	0.51 (0.22-1.17)	0.253453	-	-	-	-	-	-	-
	dimethylarginine (SDMA + ADMA)	36808	HMDB01539	123831	C03626	N[C@@H](CCC\N=C(/N)N(C)C)C(O)=O	Amino Acids	Urea cycle; Arginine and Proline Metabolism	Sensitivity	Weighted median	-	-	-	-	-	-	-	-	4	0.81 (0.67-0.97)	0.0220223	-	-	-	-	-	-	-
	dimethylarginine (SDMA + ADMA)	36808	HMDB01539	123831	C03626	N[C@@H](CCC\N=C(/N)N(C)C)C(O)=O	Amino Acids	Urea cycle; Arginine and Proline Metabolism	Sensitivity	Weighted mode	-	-	-	-	-	-	-	-	4	0.79 (0.66-0.96)	0.0994561	-	-	-	-	-	-	-
	dimethylglycine	5086	HMDB00092	673	C01026	CN(C)CC(O)=O	Amino Acids	Glycine, Serine and Threonine Metabolism	Primary	Inverse variance weighted (random effects)/ Wald ratio	2	0.98 (0.9-1.08)	0.729242	0.878415	1	1 (0.96-1.05)	0.865827	0.956017	10	1.09 (0.99-1.2)	0.0760491	0.413673	3	1.01 (0.98-1.05)	0.485679	0.805367	28.8137	0.245425
	dimethylglycine	5086	HMDB00092	673	C01026	CN(C)CC(O)=O	Amino Acids	Glycine, Serine and Threonine Metabolism	Sensitivity	Inverse variance weighted (fixed effects)	2	0.98 (0.9-1.08)	0.729242	-	-	-	-	-	10	1.09 (0.99-1.2)	0.0760491	-	-	-	-	-	-	-
	dimethylglycine	5086	HMDB00092	673	C01026	CN(C)CC(O)=O	Amino Acids	Glycine, Serine and Threonine Metabolism	Sensitivity	Inverse variance weighted (multiplicative random effects)	2	0.98 (0.95-1.01)	0.276771	-	-	-	-	-	10	1.09 (1-1.2)	0.0544999	-	-	-	-	-	-	-
	dimethylglycine	5086	HMDB00092	673	C01026	CN(C)CC(O)=O	Amino Acids	Glycine, Serine and Threonine Metabolism	Sensitivity	MR Egger	-	-	-	-	-	-	-	-	10	0.97 (0.78-1.21)	0.787788	-	-	-	-	-	-	-
	dimethylglycine	5086	HMDB00092	673	C01026	CN(C)CC(O)=O	Amino Acids	Glycine, Serine and Threonine Metabolism	Sensitivity	Weighted median	-	-	-	-	-	-	-	-	10	1.11 (0.97-1.26)	0.116456	-	-	-	-	-	-	-
	dimethylglycine	5086	HMDB00092	673	C01026	CN(C)CC(O)=O	Amino Acids	Glycine, Serine and Threonine Metabolism	Sensitivity	Weighted mode	-	-	-	-	-	-	-	-	10	1.08 (0.94-1.24)	0.325003	-	-	-	-	-	-	-
	docosahexaenoate (DHA; 22:6n3)	44675	HMDB02183	445580	C06429	CC\C=C/C\C=C/C\C=C/C\C=C/C\C=C/C\C=C/CCC(O)=O	Lipids	Polyunsaturated Fatty Acid (n3 and n6)	Primary	Inverse variance weighted (random effects)/ Wald ratio	-	-	-	-	-	-	-	-	2	1.3 (0.99-1.7)	0.0610318	0.363985	-	-	-	-	-	-
	docosahexaenoate (DHA; 22:6n3)	44675	HMDB02183	445580	C06429	CC\C=C/C\C=C/C\C=C/C\C=C/C\C=C/C\C=C/CCC(O)=O	Lipids	Polyunsaturated Fatty Acid (n3 and n6)	Sensitivity	Inverse variance weighted (fixed effects)	-	-	-	-	-	-	-	-	2	1.3 (0.99-1.7)	0.0610318	-	-	-	-	-	-	-
	docosahexaenoate (DHA; 22:6n3)	44675	HMDB02183	445580	C06429	CC\C=C/C\C=C/C\C=C/C\C=C/C\C=C/C\C=C/CCC(O)=O	Lipids	Polyunsaturated Fatty Acid (n3 and n6)	Sensitivity	Inverse variance weighted (multiplicative random effects)	-	-	-	-	-	-	-	-	2	1.3 (1.2-1.39)	5.05734e-12	-	-	-	-	-	-	-
	docosahexaenoylcholine	53263	-	-	-	-	Lipids	Fatty Acid Metabolism (Acyl Choline)	Primary	Inverse variance weighted (random effects)/ Wald ratio	-	-	-	-	-	-	-	-	1	1.18 (0.79-1.76)	0.413163	0.987241	-	-	-	-	-	-
	docosapentaenoate (n3 DPA; 22:5n3)	32504	HMDB06528	6441454	C16513	CC\C=C/C\C=C/C\C=C/C\C=C/C\C=C/CCCCCC(O)=O	Lipids	Polyunsaturated Fatty Acid (n3 and n6)	Primary	Inverse variance weighted (random effects)/ Wald ratio	-	-	-	-	2	1.06 (1.02-1.1)	0.00506138	0.0766438	12	1.25 (1.12-1.39)	3.91e-05	0.00107525	2	1.08 (1.04-1.11)	5.86812e-05	0.00192181	88.4044	0.00331769
	docosapentaenoate (n3 DPA; 22:5n3)	32504	HMDB06528	6441454	C16513	CC\C=C/C\C=C/C\C=C/C\C=C/C\C=C/CCCCCC(O)=O	Lipids	Polyunsaturated Fatty Acid (n3 and n6)	Sensitivity	Inverse variance weighted (fixed effects)	-	-	-	-	2	1.06 (1.02-1.1)	0.00506138	-	12	1.25 (1.13-1.39)	2.41e-05	-	-	-	-	-	-	-
	docosapentaenoate (n3 DPA; 22:5n3)	32504	HMDB06528	6441454	C16513	CC\C=C/C\C=C/C\C=C/C\C=C/C\C=C/CCCCCC(O)=O	Lipids	Polyunsaturated Fatty Acid (n3 and n6)	Sensitivity	Inverse variance weighted (multiplicative random effects)	-	-	-	-	2	1.06 (1.03-1.09)	0.000146397	-	12	1.25 (1.12-1.39)	3.91e-05	-	-	-	-	-	-	-
	docosapentaenoate (n3 DPA; 22:5n3)	32504	HMDB06528	6441454	C16513	CC\C=C/C\C=C/C\C=C/C\C=C/C\C=C/CCCCCC(O)=O	Lipids	Polyunsaturated Fatty Acid (n3 and n6)	Sensitivity	MR Egger	-	-	-	-	-	-	-	-	12	1.11 (0.58-2.13)	0.755412	-	-	-	-	-	-	-
	docosapentaenoate (n3 DPA; 22:5n3)	32504	HMDB06528	6441454	C16513	CC\C=C/C\C=C/C\C=C/C\C=C/C\C=C/CCCCCC(O)=O	Lipids	Polyunsaturated Fatty Acid (n3 and n6)	Sensitivity	Weighted median	-	-	-	-	-	-	-	-	12	1.19 (1.03-1.38)	0.0182769	-	-	-	-	-	-	-
	docosapentaenoate (n3 DPA; 22:5n3)	32504	HMDB06528	6441454	C16513	CC\C=C/C\C=C/C\C=C/C\C=C/C\C=C/CCCCCC(O)=O	Lipids	Polyunsaturated Fatty Acid (n3 and n6)	Sensitivity	Weighted mode	-	-	-	-	-	-	-	-	12	1.21 (1.02-1.43)	0.0523398	-	-	-	-	-	-	-
	docosapentaenoate (n6 DPA; 22:5n6)	37478	HMDB01976	6441454	C16513	CCCCC\C=C/C\C=C/C\C=C/C\C=C/C\C=C/CCC(O)=O	Lipids	Polyunsaturated Fatty Acid (n3 and n6)	Primary	Inverse variance weighted (random effects)/ Wald ratio	1	1.01 (0.89-1.16)	0.841099	0.936862	-	-	-	-	18	1.17 (1.07-1.29)	0.000598308	0.0123401	2	1.12 (1.04-1.21)	0.00311092	0.0289387	67.5298	0.0792726
	docosapentaenoate (n6 DPA; 22:5n6)	37478	HMDB01976	6441454	C16513	CCCCC\C=C/C\C=C/C\C=C/C\C=C/C\C=C/CCC(O)=O	Lipids	Polyunsaturated Fatty Acid (n3 and n6)	Sensitivity	Inverse variance weighted (fixed effects)	-	-	-	-	-	-	-	-	18	1.17 (1.07-1.29)	0.000598308	-	-	-	-	-	-	-
	docosapentaenoate (n6 DPA; 22:5n6)	37478	HMDB01976	6441454	C16513	CCCCC\C=C/C\C=C/C\C=C/C\C=C/C\C=C/CCC(O)=O	Lipids	Polyunsaturated Fatty Acid (n3 and n6)	Sensitivity	Inverse variance weighted (multiplicative random effects)	-	-	-	-	-	-	-	-	18	1.17 (1.09-1.26)	1.87e-05	-	-	-	-	-	-	-
	docosapentaenoate (n6 DPA; 22:5n6)	37478	HMDB01976	6441454	C16513	CCCCC\C=C/C\C=C/C\C=C/C\C=C/C\C=C/CCC(O)=O	Lipids	Polyunsaturated Fatty Acid (n3 and n6)	Sensitivity	MR Egger	-	-	-	-	-	-	-	-	18	1.13 (0.71-1.82)	0.615217	-	-	-	-	-	-	-
	docosapentaenoate (n6 DPA; 22:5n6)	37478	HMDB01976	6441454	C16513	CCCCC\C=C/C\C=C/C\C=C/C\C=C/C\C=C/CCC(O)=O	Lipids	Polyunsaturated Fatty Acid (n3 and n6)	Sensitivity	Weighted median	-	-	-	-	-	-	-	-	18	1.19 (1.05-1.34)	0.00583774	-	-	-	-	-	-	-
	docosapentaenoate (n6 DPA; 22:5n6)	37478	HMDB01976	6441454	C16513	CCCCC\C=C/C\C=C/C\C=C/C\C=C/C\C=C/CCC(O)=O	Lipids	Polyunsaturated Fatty Acid (n3 and n6)	Sensitivity	Weighted mode	-	-	-	-	-	-	-	-	18	1.2 (1-1.45)	0.0656319	-	-	-	-	-	-	-
	dodecanedioate	32388	HMDB00623	12736	C02678	OC(=O)CCCCCCCCCCC(O)=O	Lipids	Fatty Acid, Dicarboxylate	Primary	Inverse variance weighted (random effects)/ Wald ratio	1	0.97 (0.84-1.12)	0.711566	0.878415	-	-	-	-	1	0.88 (0.62-1.25)	0.486446	0.987241	2	0.96 (0.84-1.1)	0.544411	0.829277	0	0.614518
	dopamine 3-O-sulfate	48407	HMDB06275	122136	C13690	NCCC1=CC(OS(O)(=O)=O)=C(O)C=C1	Amino Acids	Tyrosine Metabolism	Primary	Inverse variance weighted (random effects)/ Wald ratio	-	-	-	-	-	-	-	-	5	0.98 (0.79-1.21)	0.850148	0.997496	-	-	-	-	-	-
	dopamine 3-O-sulfate	48407	HMDB06275	122136	C13690	NCCC1=CC(OS(O)(=O)=O)=C(O)C=C1	Amino Acids	Tyrosine Metabolism	Sensitivity	Inverse variance weighted (fixed effects)	-	-	-	-	-	-	-	-	5	0.98 (0.87-1.1)	0.722961	-	-	-	-	-	-	-
	dopamine 3-O-sulfate	48407	HMDB06275	122136	C13690	NCCC1=CC(OS(O)(=O)=O)=C(O)C=C1	Amino Acids	Tyrosine Metabolism	Sensitivity	Inverse variance weighted (multiplicative random effects)	-	-	-	-	-	-	-	-	5	0.98 (0.79-1.21)	0.850148	-	-	-	-	-	-	-
	dopamine 3-O-sulfate	48407	HMDB06275	122136	C13690	NCCC1=CC(OS(O)(=O)=O)=C(O)C=C1	Amino Acids	Tyrosine Metabolism	Sensitivity	MR Egger	-	-	-	-	-	-	-	-	5	0.9 (0.49-1.64)	0.744766	-	-	-	-	-	-	-
	dopamine 3-O-sulfate	48407	HMDB06275	122136	C13690	NCCC1=CC(OS(O)(=O)=O)=C(O)C=C1	Amino Acids	Tyrosine Metabolism	Sensitivity	Weighted median	-	-	-	-	-	-	-	-	5	0.91 (0.78-1.05)	0.205733	-	-	-	-	-	-	-
	dopamine 3-O-sulfate	48407	HMDB06275	122136	C13690	NCCC1=CC(OS(O)(=O)=O)=C(O)C=C1	Amino Acids	Tyrosine Metabolism	Sensitivity	Weighted mode	-	-	-	-	-	-	-	-	5	0.88 (0.75-1.03)	0.174482	-	-	-	-	-	-	-
	dopamine 4-sulfate	48406	HMDB04148	123932	C13691	NCCC1=CC=C(OS(O)(=O)=O)C(O)=C1	Amino Acids	Tyrosine Metabolism	Primary	Inverse variance weighted (random effects)/ Wald ratio	-	-	-	-	-	-	-	-	1	0.81 (0.57-1.13)	0.215718	0.742758	-	-	-	-	-	-
	ectoine	35651	HMDB0240650	126041	C06231	CC1=NCC[C@H](N1)C(O)=O	Xenobiotics	Chemical	Primary	Inverse variance weighted (random effects)/ Wald ratio	-	-	-	-	-	-	-	-	1	0.76 (0.38-1.51)	0.435951	0.987241	-	-	-	-	-	-
	eicosanodioate	39831	-	75502	-	-	Lipids	Fatty Acid, Dicarboxylate	Primary	Inverse variance weighted (random effects)/ Wald ratio	-	-	-	-	-	-	-	-	1	0.93 (0.32-2.71)	0.890363	0.997496	-	-	-	-	-	-
	eicosapentaenoate (EPA; 20:5n3)	18467	HMDB01999	446284	C06428	CC\C=C/C\C=C/C\C=C/C\C=C/C\C=C/CCCC(O)=O	Lipids	Polyunsaturated Fatty Acid (n3 and n6)	Primary	Inverse variance weighted (random effects)/ Wald ratio	-	-	-	-	2	1.02 (1-1.05)	0.0959758	0.341021	50	1.25 (1.19-1.32)	2.8e-17	2.31e-15	2	1.07 (1.05-1.1)	5.13292e-08	2.24138e-06	97.7569	2.44102e-11
	eicosapentaenoate (EPA; 20:5n3)	18467	HMDB01999	446284	C06428	CC\C=C/C\C=C/C\C=C/C\C=C/C\C=C/CCCC(O)=O	Lipids	Polyunsaturated Fatty Acid (n3 and n6)	Sensitivity	Inverse variance weighted (fixed effects)	-	-	-	-	2	1.02 (1-1.05)	0.0959758	-	50	1.25 (1.19-1.32)	2.8e-17	-	-	-	-	-	-	-
	eicosapentaenoate (EPA; 20:5n3)	18467	HMDB01999	446284	C06428	CC\C=C/C\C=C/C\C=C/C\C=C/C\C=C/CCCC(O)=O	Lipids	Polyunsaturated Fatty Acid (n3 and n6)	Sensitivity	Inverse variance weighted (multiplicative random effects)	-	-	-	-	2	1.02 (1-1.05)	0.0227419	-	50	1.25 (1.19-1.32)	2.43e-18	-	-	-	-	-	-	-
	eicosapentaenoate (EPA; 20:5n3)	18467	HMDB01999	446284	C06428	CC\C=C/C\C=C/C\C=C/C\C=C/C\C=C/CCCC(O)=O	Lipids	Polyunsaturated Fatty Acid (n3 and n6)	Sensitivity	MR Egger	-	-	-	-	-	-	-	-	50	0.96 (0.77-1.19)	0.70451	-	-	-	-	-	-	-
	eicosapentaenoate (EPA; 20:5n3)	18467	HMDB01999	446284	C06428	CC\C=C/C\C=C/C\C=C/C\C=C/C\C=C/CCCC(O)=O	Lipids	Polyunsaturated Fatty Acid (n3 and n6)	Sensitivity	Weighted median	-	-	-	-	-	-	-	-	50	1.19 (1.1-1.28)	7.17e-06	-	-	-	-	-	-	-
	eicosapentaenoate (EPA; 20:5n3)	18467	HMDB01999	446284	C06428	CC\C=C/C\C=C/C\C=C/C\C=C/C\C=C/CCCC(O)=O	Lipids	Polyunsaturated Fatty Acid (n3 and n6)	Sensitivity	Weighted mode	-	-	-	-	-	-	-	-	50	1.17 (1.04-1.31)	0.0091366	-	-	-	-	-	-	-
	epiandrosterone sulfate	33973	HMDB00365	9929317	C07635	[H][C@@]12CCC(=O)[C@@]1(C)CC[C@@]1([H])[C@@]2([H])CC[C@@]2([H])C[C@H](CC[C@]12C)OS(O)(=O)=O	Lipids	Androgenic Steroids	Primary	Inverse variance weighted (random effects)/ Wald ratio	1	1.09 (0.9-1.31)	0.377394	0.863252	2	1.01 (0.99-1.03)	0.559597	0.856985	6	1.01 (0.89-1.15)	0.846386	0.997496	3	1.01 (0.99-1.03)	0.482241	0.805367	0	0.717748
	epiandrosterone sulfate	33973	HMDB00365	9929317	C07635	[H][C@@]12CCC(=O)[C@@]1(C)CC[C@@]1([H])[C@@]2([H])CC[C@@]2([H])C[C@H](CC[C@]12C)OS(O)(=O)=O	Lipids	Androgenic Steroids	Sensitivity	Inverse variance weighted (fixed effects)	-	-	-	-	2	1.01 (0.99-1.03)	0.559597	-	6	1.01 (0.89-1.15)	0.846386	-	-	-	-	-	-	-
	epiandrosterone sulfate	33973	HMDB00365	9929317	C07635	[H][C@@]12CCC(=O)[C@@]1(C)CC[C@@]1([H])[C@@]2([H])CC[C@@]2([H])C[C@H](CC[C@]12C)OS(O)(=O)=O	Lipids	Androgenic Steroids	Sensitivity	Inverse variance weighted (multiplicative random effects)	-	-	-	-	2	1.01 (0.99-1.02)	0.412722	-	6	1.01 (0.93-1.11)	0.780398	-	-	-	-	-	-	-
	epiandrosterone sulfate	33973	HMDB00365	9929317	C07635	[H][C@@]12CCC(=O)[C@@]1(C)CC[C@@]1([H])[C@@]2([H])CC[C@@]2([H])C[C@H](CC[C@]12C)OS(O)(=O)=O	Lipids	Androgenic Steroids	Sensitivity	MR Egger	-	-	-	-	-	-	-	-	6	0.98 (0.82-1.16)	0.792475	-	-	-	-	-	-	-
	epiandrosterone sulfate	33973	HMDB00365	9929317	C07635	[H][C@@]12CCC(=O)[C@@]1(C)CC[C@@]1([H])[C@@]2([H])CC[C@@]2([H])C[C@H](CC[C@]12C)OS(O)(=O)=O	Lipids	Androgenic Steroids	Sensitivity	Weighted median	-	-	-	-	-	-	-	-	6	1 (0.87-1.16)	0.974358	-	-	-	-	-	-	-
	epiandrosterone sulfate	33973	HMDB00365	9929317	C07635	[H][C@@]12CCC(=O)[C@@]1(C)CC[C@@]1([H])[C@@]2([H])CC[C@@]2([H])C[C@H](CC[C@]12C)OS(O)(=O)=O	Lipids	Androgenic Steroids	Sensitivity	Weighted mode	-	-	-	-	-	-	-	-	6	1 (0.86-1.16)	0.985469	-	-	-	-	-	-	-
	ergothioneine	37459	HMDB03045	3032311	C05570	C[N+](C)(C)[C@@H](CC1=CNC(=S)N1)C([O-])=O	Xenobiotics	Food Component/Plant	Primary	Inverse variance weighted (random effects)/ Wald ratio	-	-	-	-	-	-	-	-	2	1.06 (0.81-1.39)	0.656572	0.994872	-	-	-	-	-	-
	ergothioneine	37459	HMDB03045	3032311	C05570	C[N+](C)(C)[C@@H](CC1=CNC(=S)N1)C([O-])=O	Xenobiotics	Food Component/Plant	Sensitivity	Inverse variance weighted (fixed effects)	-	-	-	-	-	-	-	-	2	1.06 (0.81-1.39)	0.656572	-	-	-	-	-	-	-
	ergothioneine	37459	HMDB03045	3032311	C05570	C[N+](C)(C)[C@@H](CC1=CNC(=S)N1)C([O-])=O	Xenobiotics	Food Component/Plant	Sensitivity	Inverse variance weighted (multiplicative random effects)	-	-	-	-	-	-	-	-	2	1.06 (1.02-1.11)	0.00845328	-	-	-	-	-	-	-
	erythritol	20699	HMDB02994	222285	C00503	OC[C@H](O)[C@H](O)CO	Xenobiotics	Food Component/Plant	Primary	Inverse variance weighted (random effects)/ Wald ratio	-	-	-	-	1	0.92 (0.88-0.97)	0.00173681	0.0460255	2	0.71 (0.56-0.89)	0.00356682	0.0519287	2	0.91 (0.87-0.96)	0.000238538	0.00347205	79.1669	0.0284589
	erythritol	20699	HMDB02994	222285	C00503	OC[C@H](O)[C@H](O)CO	Xenobiotics	Food Component/Plant	Sensitivity	Inverse variance weighted (fixed effects)	-	-	-	-	-	-	-	-	2	0.71 (0.56-0.89)	0.00356682	-	-	-	-	-	-	-
	erythritol	20699	HMDB02994	222285	C00503	OC[C@H](O)[C@H](O)CO	Xenobiotics	Food Component/Plant	Sensitivity	Inverse variance weighted (multiplicative random effects)	-	-	-	-	-	-	-	-	2	0.71 (0.61-0.81)	1.62e-06	-	-	-	-	-	-	-
	erythronate*	42420	HMDB00613	2781043	-	OC[C@@H](O)[C@@H](O)C(O)=O	Carbohydrates	Aminosugar Metabolism	Primary	Inverse variance weighted (random effects)/ Wald ratio	-	-	-	-	-	-	-	-	2	1.1 (0.85-1.43)	0.471691	0.987241	-	-	-	-	-	-
	erythronate*	42420	HMDB00613	2781043	-	OC[C@@H](O)[C@@H](O)C(O)=O	Carbohydrates	Aminosugar Metabolism	Sensitivity	Inverse variance weighted (fixed effects)	-	-	-	-	-	-	-	-	2	1.1 (0.85-1.43)	0.471691	-	-	-	-	-	-	-
	erythronate*	42420	HMDB00613	2781043	-	OC[C@@H](O)[C@@H](O)C(O)=O	Carbohydrates	Aminosugar Metabolism	Sensitivity	Inverse variance weighted (multiplicative random effects)	-	-	-	-	-	-	-	-	2	1.1 (1.07-1.13)	1.10304e-13	-	-	-	-	-	-	-
	ethylmalonate	15765	HMDB00622	11756	-	CCC(C(O)=O)C(O)=O	Amino Acids	Leucine, Isoleucine and Valine Metabolism	Primary	Inverse variance weighted (random effects)/ Wald ratio	-	-	-	-	-	-	-	-	28	1 (0.97-1.04)	0.849472	0.997496	-	-	-	-	-	-
	ethylmalonate	15765	HMDB00622	11756	-	CCC(C(O)=O)C(O)=O	Amino Acids	Leucine, Isoleucine and Valine Metabolism	Sensitivity	Inverse variance weighted (fixed effects)	-	-	-	-	-	-	-	-	28	1 (0.97-1.04)	0.849186	-	-	-	-	-	-	-
	ethylmalonate	15765	HMDB00622	11756	-	CCC(C(O)=O)C(O)=O	Amino Acids	Leucine, Isoleucine and Valine Metabolism	Sensitivity	Inverse variance weighted (multiplicative random effects)	-	-	-	-	-	-	-	-	28	1 (0.97-1.04)	0.849472	-	-	-	-	-	-	-
	ethylmalonate	15765	HMDB00622	11756	-	CCC(C(O)=O)C(O)=O	Amino Acids	Leucine, Isoleucine and Valine Metabolism	Sensitivity	MR Egger	-	-	-	-	-	-	-	-	28	0.94 (0.88-1.01)	0.126858	-	-	-	-	-	-	-
	ethylmalonate	15765	HMDB00622	11756	-	CCC(C(O)=O)C(O)=O	Amino Acids	Leucine, Isoleucine and Valine Metabolism	Sensitivity	Weighted median	-	-	-	-	-	-	-	-	28	0.98 (0.94-1.03)	0.495922	-	-	-	-	-	-	-
	ethylmalonate	15765	HMDB00622	11756	-	CCC(C(O)=O)C(O)=O	Amino Acids	Leucine, Isoleucine and Valine Metabolism	Sensitivity	Weighted mode	-	-	-	-	-	-	-	-	28	0.98 (0.94-1.03)	0.478621	-	-	-	-	-	-	-
	etiocholanolone glucuronide	47112	HMDB04484	270605	C11136	[H][C@@]12CCC(=O)[C@@]1(C)CC[C@@]1([H])[C@@]2([H])CC[C@]2([H])C[C@@H](CC[C@]12C)O[C@@H]1O[C@@H]([C@@H](O)[C@H](O)[C@H]1O)C(O)=O	Lipids	Androgenic Steroids	Primary	Inverse variance weighted (random effects)/ Wald ratio	-	-	-	-	-	-	-	-	4	1.03 (0.88-1.2)	0.742024	0.994872	-	-	-	-	-	-
	etiocholanolone glucuronide	47112	HMDB04484	270605	C11136	[H][C@@]12CCC(=O)[C@@]1(C)CC[C@@]1([H])[C@@]2([H])CC[C@]2([H])C[C@@H](CC[C@]12C)O[C@@H]1O[C@@H]([C@@H](O)[C@H](O)[C@H]1O)C(O)=O	Lipids	Androgenic Steroids	Sensitivity	Inverse variance weighted (fixed effects)	-	-	-	-	-	-	-	-	4	1.03 (0.88-1.2)	0.742024	-	-	-	-	-	-	-
	etiocholanolone glucuronide	47112	HMDB04484	270605	C11136	[H][C@@]12CCC(=O)[C@@]1(C)CC[C@@]1([H])[C@@]2([H])CC[C@]2([H])C[C@@H](CC[C@]12C)O[C@@H]1O[C@@H]([C@@H](O)[C@H](O)[C@H]1O)C(O)=O	Lipids	Androgenic Steroids	Sensitivity	Inverse variance weighted (multiplicative random effects)	-	-	-	-	-	-	-	-	4	1.03 (0.98-1.08)	0.291884	-	-	-	-	-	-	-
	etiocholanolone glucuronide	47112	HMDB04484	270605	C11136	[H][C@@]12CCC(=O)[C@@]1(C)CC[C@@]1([H])[C@@]2([H])CC[C@]2([H])C[C@@H](CC[C@]12C)O[C@@H]1O[C@@H]([C@@H](O)[C@H](O)[C@H]1O)C(O)=O	Lipids	Androgenic Steroids	Sensitivity	MR Egger	-	-	-	-	-	-	-	-	4	1.01 (0.79-1.29)	0.943159	-	-	-	-	-	-	-
	etiocholanolone glucuronide	47112	HMDB04484	270605	C11136	[H][C@@]12CCC(=O)[C@@]1(C)CC[C@@]1([H])[C@@]2([H])CC[C@]2([H])C[C@@H](CC[C@]12C)O[C@@H]1O[C@@H]([C@@H](O)[C@H](O)[C@H]1O)C(O)=O	Lipids	Androgenic Steroids	Sensitivity	Weighted median	-	-	-	-	-	-	-	-	4	1.02 (0.86-1.21)	0.85051	-	-	-	-	-	-	-
	etiocholanolone glucuronide	47112	HMDB04484	270605	C11136	[H][C@@]12CCC(=O)[C@@]1(C)CC[C@@]1([H])[C@@]2([H])CC[C@]2([H])C[C@@H](CC[C@]12C)O[C@@H]1O[C@@H]([C@@H](O)[C@H](O)[C@H]1O)C(O)=O	Lipids	Androgenic Steroids	Sensitivity	Weighted mode	-	-	-	-	-	-	-	-	4	1.01 (0.85-1.21)	0.9009	-	-	-	-	-	-	-
	eugenol sulfate	48715	-	180632	-	-	Xenobiotics	Food Component/Plant	Primary	Inverse variance weighted (random effects)/ Wald ratio	-	-	-	-	-	-	-	-	1	1.56 (1-2.43)	0.0478888	0.307857	-	-	-	-	-	-
	flavin adenine dinucleotide (FAD)	-	-	-	-	-	Nucleotides	Flavin nucleotides	Primary	Inverse variance weighted (random effects)/ Wald ratio	-	-	-	-	-	-	-	-	1	0.89 (0.69-1.16)	0.395137	0.977965	-	-	-	-	-	-
	fumarate	1643	HMDB00134	444972	C00122	OC(=O)\C=C\C(O)=O	Energy	TCA Cycle	Primary	Inverse variance weighted (random effects)/ Wald ratio	-	-	-	-	-	-	-	-	1	0.59 (0.39-0.91)	0.0159917	0.147151	-	-	-	-	-	-
	galactonate	27719	HMDB00565	128869	C00880	OC[C@@H](O)[C@H](O)[C@H](O)[C@@H](O)C(O)=O	Carbohydrates	Fructose, Mannose, Galactose, Starch, and Sucrose Metabolism	Primary	Inverse variance weighted (random effects)/ Wald ratio	-	-	-	-	-	-	-	-	1	0.94 (0.7-1.26)	0.670278	0.994872	-	-	-	-	-	-
	gamma-CEHC	44876	HMDB01931	133098	-	CC1=C(O)C=C2CCC(C)(CCC(O)=O)OC2=C1C	Cofactors and Vitamins	Tocopherol Metabolism	Primary	Inverse variance weighted (random effects)/ Wald ratio	-	-	-	-	-	-	-	-	1	0.95 (0.76-1.2)	0.680991	0.994872	-	-	-	-	-	-
	gamma-CEHC glucuronide*	42381	-	-	-	-	Cofactors and Vitamins	Tocopherol Metabolism	Primary	Inverse variance weighted (random effects)/ Wald ratio	-	-	-	-	-	-	-	-	2	0.94 (0.74-1.19)	0.598852	0.994872	-	-	-	-	-	-
	gamma-CEHC glucuronide*	42381	-	-	-	-	Cofactors and Vitamins	Tocopherol Metabolism	Sensitivity	Inverse variance weighted (fixed effects)	-	-	-	-	-	-	-	-	2	0.94 (0.74-1.19)	0.598852	-	-	-	-	-	-	-
	gamma-CEHC glucuronide*	42381	-	-	-	-	Cofactors and Vitamins	Tocopherol Metabolism	Sensitivity	Inverse variance weighted (multiplicative random effects)	-	-	-	-	-	-	-	-	2	0.94 (0.93-0.95)	2.25917e-28	-	-	-	-	-	-	-
	gamma-glutamyl-2-aminobutyrate	37092	-	-	-	-	Peptides	Gamma-glutamyl Amino Acid	Primary	Inverse variance weighted (random effects)/ Wald ratio	-	-	-	-	-	-	-	-	1	1.05 (0.76-1.45)	0.774515	0.994872	-	-	-	-	-	-
	gamma-glutamyl-alpha-lysine	55015	HMDB0029154	65254	-	NCCCC[C@H](NC(=O)CC[C@H](N)C(O)=O)C(O)=O	Peptides	Gamma-glutamyl Amino Acid	Primary	Inverse variance weighted (random effects)/ Wald ratio	-	-	-	-	-	-	-	-	1	1.3 (0.95-1.78)	0.10333	0.511484	-	-	-	-	-	-
	gamma-glutamylalanine	37063	HMDB29142	440103	C03740	C[C@H](NC(=O)CC[C@H](N)C(O)=O)C(O)=O	Peptides	Gamma-glutamyl Amino Acid	Primary	Inverse variance weighted (random effects)/ Wald ratio	2	0.95 (0.86-1.06)	0.352283	0.863252	-	-	-	-	-	-	-	-	-	-	-	-	-	-
	gamma-glutamylalanine	37063	HMDB29142	440103	C03740	C[C@H](NC(=O)CC[C@H](N)C(O)=O)C(O)=O	Peptides	Gamma-glutamyl Amino Acid	Sensitivity	Inverse variance weighted (fixed effects)	2	0.95 (0.86-1.06)	0.352283	-	-	-	-	-	-	-	-	-	-	-	-	-	-	-
	gamma-glutamylalanine	37063	HMDB29142	440103	C03740	C[C@H](NC(=O)CC[C@H](N)C(O)=O)C(O)=O	Peptides	Gamma-glutamyl Amino Acid	Sensitivity	Inverse variance weighted (multiplicative random effects)	2	0.95 (0.88-1.03)	0.229749	-	-	-	-	-	-	-	-	-	-	-	-	-	-	-
	gamma-glutamylglutamate	36738	HMDB11737	92865	C05282	N[C@@H](CCC(=O)N[C@@H](CCC(O)=O)C(O)=O)C(O)=O	Peptides	Gamma-glutamyl Amino Acid	Primary	Inverse variance weighted (random effects)/ Wald ratio	2	0.95 (0.84-1.06)	0.341073	0.863252	-	-	-	-	1	1.03 (0.72-1.48)	0.879021	0.997496	2	0.95 (0.85-1.06)	0.388474	0.737537	0	0.666423
	gamma-glutamylglutamate	36738	HMDB11737	92865	C05282	N[C@@H](CCC(=O)N[C@@H](CCC(O)=O)C(O)=O)C(O)=O	Peptides	Gamma-glutamyl Amino Acid	Sensitivity	Inverse variance weighted (fixed effects)	2	0.95 (0.84-1.06)	0.341073	-	-	-	-	-	-	-	-	-	-	-	-	-	-	-
	gamma-glutamylglutamate	36738	HMDB11737	92865	C05282	N[C@@H](CCC(=O)N[C@@H](CCC(O)=O)C(O)=O)C(O)=O	Peptides	Gamma-glutamyl Amino Acid	Sensitivity	Inverse variance weighted (multiplicative random effects)	2	0.95 (0.93-0.96)	4.70857e-12	-	-	-	-	-	-	-	-	-	-	-	-	-	-	-
	gamma-glutamylglutamine	2730	HMDB11738	150914	C05283	N[C@@H](CCC(=O)N[C@@H](CCC(N)=O)C(O)=O)C(O)=O	Peptides	Gamma-glutamyl Amino Acid	Primary	Inverse variance weighted (random effects)/ Wald ratio	-	-	-	-	-	-	-	-	2	0.84 (0.66-1.07)	0.150815	0.6257	-	-	-	-	-	-
	gamma-glutamylglutamine	2730	HMDB11738	150914	C05283	N[C@@H](CCC(=O)N[C@@H](CCC(N)=O)C(O)=O)C(O)=O	Peptides	Gamma-glutamyl Amino Acid	Sensitivity	Inverse variance weighted (fixed effects)	-	-	-	-	-	-	-	-	2	0.84 (0.66-1.07)	0.150815	-	-	-	-	-	-	-
	gamma-glutamylglutamine	2730	HMDB11738	150914	C05283	N[C@@H](CCC(=O)N[C@@H](CCC(N)=O)C(O)=O)C(O)=O	Peptides	Gamma-glutamyl Amino Acid	Sensitivity	Inverse variance weighted (multiplicative random effects)	-	-	-	-	-	-	-	-	2	0.84 (0.7-1.01)	0.0591449	-	-	-	-	-	-	-
	gamma-glutamylglycine	33949	HMDB11667	165527	-	N[C@@H](CCC(=O)NCC(O)=O)C(O)=O	Peptides	Gamma-glutamyl Amino Acid	Primary	Inverse variance weighted (random effects)/ Wald ratio	-	-	-	-	-	-	-	-	7	0.98 (0.88-1.1)	0.781872	0.994872	-	-	-	-	-	-
	gamma-glutamylglycine	33949	HMDB11667	165527	-	N[C@@H](CCC(=O)NCC(O)=O)C(O)=O	Peptides	Gamma-glutamyl Amino Acid	Sensitivity	Inverse variance weighted (fixed effects)	-	-	-	-	-	-	-	-	7	0.98 (0.89-1.09)	0.774263	-	-	-	-	-	-	-
	gamma-glutamylglycine	33949	HMDB11667	165527	-	N[C@@H](CCC(=O)NCC(O)=O)C(O)=O	Peptides	Gamma-glutamyl Amino Acid	Sensitivity	Inverse variance weighted (multiplicative random effects)	-	-	-	-	-	-	-	-	7	0.98 (0.88-1.1)	0.781872	-	-	-	-	-	-	-
	gamma-glutamylglycine	33949	HMDB11667	165527	-	N[C@@H](CCC(=O)NCC(O)=O)C(O)=O	Peptides	Gamma-glutamyl Amino Acid	Sensitivity	MR Egger	-	-	-	-	-	-	-	-	7	0.89 (0.72-1.09)	0.304535	-	-	-	-	-	-	-
	gamma-glutamylglycine	33949	HMDB11667	165527	-	N[C@@H](CCC(=O)NCC(O)=O)C(O)=O	Peptides	Gamma-glutamyl Amino Acid	Sensitivity	Weighted median	-	-	-	-	-	-	-	-	7	0.95 (0.85-1.07)	0.438818	-	-	-	-	-	-	-
	gamma-glutamylglycine	33949	HMDB11667	165527	-	N[C@@H](CCC(=O)NCC(O)=O)C(O)=O	Peptides	Gamma-glutamyl Amino Acid	Sensitivity	Weighted mode	-	-	-	-	-	-	-	-	7	0.95 (0.84-1.06)	0.381792	-	-	-	-	-	-	-
	gamma-glutamylhistidine	18245	HMDB0029151	7017195	-	N[C@@H](CCC(=O)N[C@@H](CC1=CNC=N1)C(O)=O)C(O)=O	Peptides	Gamma-glutamyl Amino Acid	Primary	Inverse variance weighted (random effects)/ Wald ratio	-	-	-	-	-	-	-	-	1	1.7 (1.09-2.65)	0.0181766	0.155128	-	-	-	-	-	-
	gamma-glutamylisoleucine*	34456	HMDB11170	14253342	-	CC[C@H](C)[C@H](NC(=O)CC[C@H](N)C(O)=O)C(O)=O	Peptides	Gamma-glutamyl Amino Acid	Primary	Inverse variance weighted (random effects)/ Wald ratio	2	0.95 (0.86-1.05)	0.315427	0.863252	-	-	-	-	1	0.92 (0.58-1.45)	0.705115	0.994872	2	0.95 (0.86-1.05)	0.288043	0.640985	0	0.881469
	gamma-glutamylisoleucine*	34456	HMDB11170	14253342	-	CC[C@H](C)[C@H](NC(=O)CC[C@H](N)C(O)=O)C(O)=O	Peptides	Gamma-glutamyl Amino Acid	Sensitivity	Inverse variance weighted (fixed effects)	2	0.95 (0.86-1.05)	0.315427	-	-	-	-	-	-	-	-	-	-	-	-	-	-	-
	gamma-glutamylisoleucine*	34456	HMDB11170	14253342	-	CC[C@H](C)[C@H](NC(=O)CC[C@H](N)C(O)=O)C(O)=O	Peptides	Gamma-glutamyl Amino Acid	Sensitivity	Inverse variance weighted (multiplicative random effects)	2	0.95 (0.93-0.97)	2.23267e-08	-	-	-	-	-	-	-	-	-	-	-	-	-	-	-
	gamma-glutamylleucine	18369	HMDB11171	151023	-	CC(C)C[C@H](NC(=O)CC[C@H](N)C(O)=O)C(O)=O	Peptides	Gamma-glutamyl Amino Acid	Primary	Inverse variance weighted (random effects)/ Wald ratio	3	0.95 (0.88-1.04)	0.257215	0.863252	1	0.94 (0.89-0.99)	0.0313918	0.219098	-	-	-	-	2	0.94 (0.9-0.99)	0.0157628	0.09833	0	0.769669
	gamma-glutamylleucine	18369	HMDB11171	151023	-	CC(C)C[C@H](NC(=O)CC[C@H](N)C(O)=O)C(O)=O	Peptides	Gamma-glutamyl Amino Acid	Sensitivity	Inverse variance weighted (fixed effects)	3	0.95 (0.88-1.04)	0.257215	-	-	-	-	-	-	-	-	-	-	-	-	-	-	-
	gamma-glutamylleucine	18369	HMDB11171	151023	-	CC(C)C[C@H](NC(=O)CC[C@H](N)C(O)=O)C(O)=O	Peptides	Gamma-glutamyl Amino Acid	Sensitivity	Inverse variance weighted (multiplicative random effects)	3	0.95 (0.95-0.96)	5.96847e-68	-	-	-	-	-	-	-	-	-	-	-	-	-	-	-
	gamma-glutamylleucine	18369	HMDB11171	151023	-	CC(C)C[C@H](NC(=O)CC[C@H](N)C(O)=O)C(O)=O	Peptides	Gamma-glutamyl Amino Acid	Sensitivity	MR Egger	3	0.94 (0.62-1.42)	0.812528	-	-	-	-	-	-	-	-	-	-	-	-	-	-	-
	gamma-glutamylleucine	18369	HMDB11171	151023	-	CC(C)C[C@H](NC(=O)CC[C@H](N)C(O)=O)C(O)=O	Peptides	Gamma-glutamyl Amino Acid	Sensitivity	Weighted median	3	0.95 (0.87-1.05)	0.340286	-	-	-	-	-	-	-	-	-	-	-	-	-	-	-
	gamma-glutamylleucine	18369	HMDB11171	151023	-	CC(C)C[C@H](NC(=O)CC[C@H](N)C(O)=O)C(O)=O	Peptides	Gamma-glutamyl Amino Acid	Sensitivity	Weighted mode	3	0.96 (0.85-1.07)	0.526654	-	-	-	-	-	-	-	-	-	-	-	-	-	-	-
	gamma-glutamylmethionine	44872	HMDB29155	7009567	-	CSCC[C@H](NC(=O)CC[C@H](N)C(O)=O)C(O)=O	Peptides	Gamma-glutamyl Amino Acid	Primary	Inverse variance weighted (random effects)/ Wald ratio	-	-	-	-	-	-	-	-	1	0.86 (0.57-1.31)	0.484974	0.987241	-	-	-	-	-	-
	gamma-glutamylphenylalanine	33422	HMDB00594	111299	-	N[C@@H](CCC(=O)N[C@@H](CC1=CC=CC=C1)C(O)=O)C(O)=O	Peptides	Gamma-glutamyl Amino Acid	Primary	Inverse variance weighted (random effects)/ Wald ratio	1	0.98 (0.84-1.13)	0.754294	0.884862	1	0.95 (0.89-1.02)	0.162021	0.406572	1	0.85 (0.54-1.34)	0.4902	0.987241	3	0.96 (0.9-1.01)	0.1383	0.441885	0	0.846859
	gamma-glutamylthreonine	33364	HMDB29159	76078708	-	C[C@@H](O)[C@H](NC(=O)CC[C@H](N)C(O)=O)C(O)=O	Peptides	Gamma-glutamyl Amino Acid	Primary	Inverse variance weighted (random effects)/ Wald ratio	-	-	-	-	-	-	-	-	1	1.52 (1.12-2.05)	0.00678422	0.0883734	-	-	-	-	-	-
	gamma-glutamyltyrosine	2734	HMDB11741	94340	-	N[C@@H](CCC(=O)N[C@@H](CC1=CC=C(O)C=C1)C(O)=O)C(O)=O	Peptides	Gamma-glutamyl Amino Acid	Primary	Inverse variance weighted (random effects)/ Wald ratio	2	1.05 (0.89-1.24)	0.580619	0.870677	-	-	-	-	1	2.36 (0.96-5.82)	0.0621919	0.364644	2	1.08 (0.91-1.27)	0.378026	0.737537	66.7324	0.0829604
	gamma-glutamyltyrosine	2734	HMDB11741	94340	-	N[C@@H](CCC(=O)N[C@@H](CC1=CC=C(O)C=C1)C(O)=O)C(O)=O	Peptides	Gamma-glutamyl Amino Acid	Sensitivity	Inverse variance weighted (fixed effects)	2	1.05 (0.94-1.16)	0.377352	-	-	-	-	-	-	-	-	-	-	-	-	-	-	-
	gamma-glutamyltyrosine	2734	HMDB11741	94340	-	N[C@@H](CCC(=O)N[C@@H](CC1=CC=C(O)C=C1)C(O)=O)C(O)=O	Peptides	Gamma-glutamyl Amino Acid	Sensitivity	Inverse variance weighted (multiplicative random effects)	2	1.05 (0.89-1.24)	0.580619	-	-	-	-	-	-	-	-	-	-	-	-	-	-	-
	gamma-glutamylvaline	43829	HMDB11172	7015683	-	CC(C)[C@H](NC(=O)CC[C@H](N)C(O)=O)C(O)=O	Peptides	Gamma-glutamyl Amino Acid	Primary	Inverse variance weighted (random effects)/ Wald ratio	2	0.91 (0.83-1.01)	0.082374	0.863252	-	-	-	-	-	-	-	-	-	-	-	-	-	-
	gamma-glutamylvaline	43829	HMDB11172	7015683	-	CC(C)[C@H](NC(=O)CC[C@H](N)C(O)=O)C(O)=O	Peptides	Gamma-glutamyl Amino Acid	Sensitivity	Inverse variance weighted (fixed effects)	2	0.91 (0.83-1.01)	0.082374	-	-	-	-	-	-	-	-	-	-	-	-	-	-	-
	gamma-glutamylvaline	43829	HMDB11172	7015683	-	CC(C)[C@H](NC(=O)CC[C@H](N)C(O)=O)C(O)=O	Peptides	Gamma-glutamyl Amino Acid	Sensitivity	Inverse variance weighted (multiplicative random effects)	2	0.91 (0.86-0.97)	0.00331995	-	-	-	-	-	-	-	-	-	-	-	-	-	-	-
	gentisate	18280	HMDB00152	3469	C00628	OC(=O)C1=C(O)C=CC(O)=C1	Amino Acids	Tyrosine Metabolism	Primary	Inverse variance weighted (random effects)/ Wald ratio	-	-	-	-	-	-	-	-	1	1.58 (0.94-2.64)	0.0818389	0.435594	-	-	-	-	-	-
	gluconate	587	HMDB00625	10690	C00257	OC[C@@H](O)[C@@H](O)[C@H](O)[C@@H](O)C(O)=O	Xenobiotics	Food Component/Plant	Primary	Inverse variance weighted (random effects)/ Wald ratio	1	0.96 (0.78-1.17)	0.663206	0.878415	1	1.04 (1-1.09)	0.0741211	0.29103	-	-	-	-	2	1.04 (0.99-1.08)	0.0975582	0.345409	0	0.425955
	glucose	48152	HMDB00122	79025	C00031	OC[C@H]1O[C@@H](O)[C@H](O)[C@@H](O)[C@@H]1O	Carbohydrates	Glycolysis, Gluconeogenesis, and Pyruvate Metabolism	Primary	Inverse variance weighted (random effects)/ Wald ratio	-	-	-	-	-	-	-	-	1	1.18 (0.75-1.85)	0.484351	0.987241	-	-	-	-	-	-
	glucuronate	15443	HMDB00127	444791	C00191	O[C@H]1O[C@@H]([C@@H](O)[C@H](O)[C@H]1O)C(O)=O	Carbohydrates	Aminosugar Metabolism	Primary	Inverse variance weighted (random effects)/ Wald ratio	-	-	-	-	-	-	-	-	1	1.09 (0.68-1.72)	0.72618	0.994872	-	-	-	-	-	-
	glutamate	57	HMDB00148	611	C00025	N[C@@H](CCC(O)=O)C(O)=O	Amino Acids	Glutamate Metabolism	Primary	Inverse variance weighted (random effects)/ Wald ratio	2	0.96 (0.86-1.07)	0.468013	0.863252	-	-	-	-	-	-	-	-	-	-	-	-	-	-
	glutamate	57	HMDB00148	611	C00025	N[C@@H](CCC(O)=O)C(O)=O	Amino Acids	Glutamate Metabolism	Sensitivity	Inverse variance weighted (fixed effects)	2	0.96 (0.86-1.07)	0.468013	-	-	-	-	-	-	-	-	-	-	-	-	-	-	-
	glutamate	57	HMDB00148	611	C00025	N[C@@H](CCC(O)=O)C(O)=O	Amino Acids	Glutamate Metabolism	Sensitivity	Inverse variance weighted (multiplicative random effects)	2	0.96 (0.87-1.06)	0.402111	-	-	-	-	-	-	-	-	-	-	-	-	-	-	-
	glutamine	53	HMDB00641	5961	C00064	N[C@@H](CCC(N)=O)C(O)=O	Amino Acids	Glutamate Metabolism	Primary	Inverse variance weighted (random effects)/ Wald ratio	-	-	-	-	-	-	-	-	1	0.83 (0.67-1.04)	0.109822	0.526474	-	-	-	-	-	-
	glutarate (pentanedioate)	396	HMDB00661	743	C00489	OC(=O)CCCC(O)=O	Lipids	Fatty Acid, Dicarboxylate	Primary	Inverse variance weighted (random effects)/ Wald ratio	-	-	-	-	-	-	-	-	1	0.69 (0.5-0.96)	0.0269127	0.198545	-	-	-	-	-	-
	glutarylcarnitine (C5-DC)	44664	HMDB13130	71464488		C[N+](C)(C)C[C@@H](CC(O)=O)OC(=O)CCCC(O)=O	Amino Acids	Lysine Metabolism	Primary	Inverse variance weighted (random effects)/ Wald ratio	4	1.04 (0.96-1.11)	0.351216	0.863252	3	1.02 (0.98-1.06)	0.300271	0.578703	7	0.98 (0.87-1.11)	0.802704	0.994872	3	1.02 (0.99-1.05)	0.216806	0.571237	0	0.787016
	glutarylcarnitine (C5-DC)	44664	HMDB13130	71464488		C[N+](C)(C)C[C@@H](CC(O)=O)OC(=O)CCCC(O)=O	Amino Acids	Lysine Metabolism	Sensitivity	Inverse variance weighted (fixed effects)	4	1.04 (0.97-1.1)	0.300545	-	3	1.02 (0.99-1.05)	0.143195	-	7	0.98 (0.87-1.11)	0.802704	-	-	-	-	-	-	-
	glutarylcarnitine (C5-DC)	44664	HMDB13130	71464488		C[N+](C)(C)C[C@@H](CC(O)=O)OC(=O)CCCC(O)=O	Amino Acids	Lysine Metabolism	Sensitivity	Inverse variance weighted (multiplicative random effects)	4	1.04 (0.96-1.11)	0.351216	-	3	1.02 (0.98-1.06)	0.300271	-	7	0.98 (0.89-1.09)	0.763413	-	-	-	-	-	-	-
	glutarylcarnitine (C5-DC)	44664	HMDB13130	71464488		C[N+](C)(C)C[C@@H](CC(O)=O)OC(=O)CCCC(O)=O	Amino Acids	Lysine Metabolism	Sensitivity	MR Egger	4	1.13 (0.75-1.72)	0.611936	-	3	0.94 (0.52-1.7)	0.865619	-	7	0.94 (0.64-1.37)	0.760064	-	-	-	-	-	-	-
	glutarylcarnitine (C5-DC)	44664	HMDB13130	71464488		C[N+](C)(C)C[C@@H](CC(O)=O)OC(=O)CCCC(O)=O	Amino Acids	Lysine Metabolism	Sensitivity	Weighted median	4	1.06 (0.98-1.15)	0.163957	-	3	1.01 (0.98-1.04)	0.487485	-	7	1 (0.85-1.18)	0.989853	-	-	-	-	-	-	-
	glutarylcarnitine (C5-DC)	44664	HMDB13130	71464488		C[N+](C)(C)C[C@@H](CC(O)=O)OC(=O)CCCC(O)=O	Amino Acids	Lysine Metabolism	Sensitivity	Weighted mode	4	1.07 (0.98-1.18)	0.244546	-	3	1.01 (0.97-1.04)	0.771718	-	7	1 (0.81-1.24)	0.965893	-	-	-	-	-	-	-
	glycerate	1572	HMDB00139	752	C00258	OC[C@@H](O)C(O)=O	Carbohydrates	Glycolysis, Gluconeogenesis, and Pyruvate Metabolism	Primary	Inverse variance weighted (random effects)/ Wald ratio	2	1 (0.91-1.11)	0.988407	1	-	-	-	-	-	-	-	-	-	-	-	-	-	-
	glycerate	1572	HMDB00139	752	C00258	OC[C@@H](O)C(O)=O	Carbohydrates	Glycolysis, Gluconeogenesis, and Pyruvate Metabolism	Sensitivity	Inverse variance weighted (fixed effects)	2	1 (0.91-1.11)	0.988407	-	-	-	-	-	-	-	-	-	-	-	-	-	-	-
	glycerate	1572	HMDB00139	752	C00258	OC[C@@H](O)C(O)=O	Carbohydrates	Glycolysis, Gluconeogenesis, and Pyruvate Metabolism	Sensitivity	Inverse variance weighted (multiplicative random effects)	2	1 (0.99-1.01)	0.867278	-	-	-	-	-	-	-	-	-	-	-	-	-	-	-
	glycerol	15122	HMDB00131	753	C00116	OCC(O)CO	Lipids	Glycerolipid Metabolism	Primary	Inverse variance weighted (random effects)/ Wald ratio	1	0.95 (0.81-1.11)	0.524404	0.863348	-	-	-	-	-	-	-	-	-	-	-	-	-	-
	glycerol 3-phosphate (G3P)	43847	HMDB00126	439162	C00093	OC[C@@H](O)COP(O)(O)=O	Lipids	Glycerolipid Metabolism	Primary	Inverse variance weighted (random effects)/ Wald ratio	1	0.99 (0.85-1.14)	0.843891	0.936862	-	-	-	-	-	-	-	-	-	-	-	-	-	-
	glycine	58	HMDB00123	750	C00037	NCC(O)=O	Amino Acids	Glycine, Serine and Threonine Metabolism	Primary	Inverse variance weighted (random effects)/ Wald ratio	2	1.01 (0.76-1.33)	0.955449	0.985542	1	1.01 (0.98-1.03)	0.605579	0.856985	8	0.98 (0.89-1.09)	0.733799	0.994872	3	1 (0.98-1.03)	0.66135	0.87512	0	0.907767
	glycine	58	HMDB00123	750	C00037	NCC(O)=O	Amino Acids	Glycine, Serine and Threonine Metabolism	Sensitivity	Inverse variance weighted (fixed effects)	2	1.01 (0.94-1.08)	0.829342	-	-	-	-	-	8	0.98 (0.9-1.08)	0.708788	-	-	-	-	-	-	-
	glycine	58	HMDB00123	750	C00037	NCC(O)=O	Amino Acids	Glycine, Serine and Threonine Metabolism	Sensitivity	Inverse variance weighted (multiplicative random effects)	2	1.01 (0.76-1.33)	0.955449	-	-	-	-	-	8	0.98 (0.89-1.09)	0.733799	-	-	-	-	-	-	-
	glycine	58	HMDB00123	750	C00037	NCC(O)=O	Amino Acids	Glycine, Serine and Threonine Metabolism	Sensitivity	MR Egger	-	-	-	-	-	-	-	-	8	0.89 (0.76-1.05)	0.204748	-	-	-	-	-	-	-
	glycine	58	HMDB00123	750	C00037	NCC(O)=O	Amino Acids	Glycine, Serine and Threonine Metabolism	Sensitivity	Weighted median	-	-	-	-	-	-	-	-	8	0.97 (0.87-1.07)	0.503964	-	-	-	-	-	-	-
	glycine	58	HMDB00123	750	C00037	NCC(O)=O	Amino Acids	Glycine, Serine and Threonine Metabolism	Sensitivity	Weighted mode	-	-	-	-	-	-	-	-	8	0.96 (0.86-1.08)	0.527576	-	-	-	-	-	-	-
	glycochenodeoxycholate	32346	HMDB00637	12544	C05466	[H][C@@]1(CC[C@@]2([H])[C@]3([H])[C@H](O)C[C@]4([H])C[C@H](O)CC[C@]4(C)[C@@]3([H])CC[C@]12C)[C@H](C)CCC(=O)NCC(O)=O	Lipids	Primary Bile Acid Metabolism	Primary	Inverse variance weighted (random effects)/ Wald ratio	-	-	-	-	1	1.04 (0.99-1.11)	0.139153	0.378212	-	-	-	-	-	-	-	-	-	-
	glycochenodeoxycholate glucuronide (1)	52983	-	-	-	-	Lipids	Primary Bile Acid Metabolism	Primary	Inverse variance weighted (random effects)/ Wald ratio	-	-	-	-	-	-	-	-	11	1.01 (0.95-1.08)	0.710128	0.994872	-	-	-	-	-	-
	glycochenodeoxycholate glucuronide (1)	52983	-	-	-	-	Lipids	Primary Bile Acid Metabolism	Sensitivity	Inverse variance weighted (fixed effects)	-	-	-	-	-	-	-	-	11	1.01 (0.95-1.08)	0.710128	-	-	-	-	-	-	-
	glycochenodeoxycholate glucuronide (1)	52983	-	-	-	-	Lipids	Primary Bile Acid Metabolism	Sensitivity	Inverse variance weighted (multiplicative random effects)	-	-	-	-	-	-	-	-	11	1.01 (0.98-1.05)	0.505589	-	-	-	-	-	-	-
	glycochenodeoxycholate glucuronide (1)	52983	-	-	-	-	Lipids	Primary Bile Acid Metabolism	Sensitivity	MR Egger	-	-	-	-	-	-	-	-	11	1.02 (0.9-1.15)	0.765734	-	-	-	-	-	-	-
	glycochenodeoxycholate glucuronide (1)	52983	-	-	-	-	Lipids	Primary Bile Acid Metabolism	Sensitivity	Weighted median	-	-	-	-	-	-	-	-	11	1 (0.93-1.09)	0.908132	-	-	-	-	-	-	-
	glycochenodeoxycholate glucuronide (1)	52983	-	-	-	-	Lipids	Primary Bile Acid Metabolism	Sensitivity	Weighted mode	-	-	-	-	-	-	-	-	11	1.01 (0.93-1.09)	0.835905	-	-	-	-	-	-	-
	glycochenodeoxycholate sulfate	-	-	-	-	-	Lipids	Primary Bile Acid Metabolism	Primary	Inverse variance weighted (random effects)/ Wald ratio	-	-	-	-	-	-	-	-	3	1.38 (0.85-2.24)	0.188339	0.695729	-	-	-	-	-	-
	glycochenodeoxycholate sulfate	-	-	-	-	-	Lipids	Primary Bile Acid Metabolism	Sensitivity	Inverse variance weighted (fixed effects)	-	-	-	-	-	-	-	-	3	1.38 (1.09-1.76)	0.00777708	-	-	-	-	-	-	-
	glycochenodeoxycholate sulfate	-	-	-	-	-	Lipids	Primary Bile Acid Metabolism	Sensitivity	Inverse variance weighted (multiplicative random effects)	-	-	-	-	-	-	-	-	3	1.38 (0.85-2.24)	0.188339	-	-	-	-	-	-	-
	glycochenodeoxycholate sulfate	-	-	-	-	-	Lipids	Primary Bile Acid Metabolism	Sensitivity	MR Egger	-	-	-	-	-	-	-	-	3	2.81 (0.18-42.91)	0.592573	-	-	-	-	-	-	-
	glycochenodeoxycholate sulfate	-	-	-	-	-	Lipids	Primary Bile Acid Metabolism	Sensitivity	Weighted median	-	-	-	-	-	-	-	-	3	1.24 (0.92-1.67)	0.165423	-	-	-	-	-	-	-
	glycochenodeoxycholate sulfate	-	-	-	-	-	Lipids	Primary Bile Acid Metabolism	Sensitivity	Weighted mode	-	-	-	-	-	-	-	-	3	1.16 (0.85-1.58)	0.446788	-	-	-	-	-	-	-
	glycocholate	18476	HMDB00138	10140	C01921	C[C@H](CCC(O)=NCC(O)=O)[C@H]1CC[C@H]2[C@@H]3[C@H](O)C[C@@H]4C[C@H](O)CC[C@]4(C)[C@H]3C[C@H](O)[C@]12C	Lipids	Primary Bile Acid Metabolism	Primary	Inverse variance weighted (random effects)/ Wald ratio	1	0.88 (0.76-1.02)	0.0941498	0.863252	-	-	-	-	1	1.13 (0.5-2.53)	0.769583	0.994872	2	0.89 (0.76-1.03)	0.111505	0.3844	0	0.551357
	glycocholenate sulfate	-	-	-	-	-	Lipids	Secondary Bile Acid Metabolism	Primary	Inverse variance weighted (random effects)/ Wald ratio	3	1.03 (0.96-1.1)	0.454763	0.863252	4	1 (0.99-1.02)	0.585331	0.856985	15	0.97 (0.9-1.05)	0.438079	0.987241	3	1 (0.99-1.02)	0.602603	0.856655	0	0.552497
	glycocholenate sulfate	-	-	-	-	-	Lipids	Secondary Bile Acid Metabolism	Sensitivity	Inverse variance weighted (fixed effects)	3	1.03 (0.96-1.1)	0.454763	-	4	1 (0.99-1.02)	0.585331	-	15	0.97 (0.9-1.05)	0.438079	-	-	-	-	-	-	-
	glycocholenate sulfate	-	-	-	-	-	Lipids	Secondary Bile Acid Metabolism	Sensitivity	Inverse variance weighted (multiplicative random effects)	3	1.03 (0.96-1.1)	0.425755	-	4	1 (0.99-1.02)	0.52822	-	15	0.97 (0.91-1.04)	0.372031	-	-	-	-	-	-	-
	glycocholenate sulfate	-	-	-	-	-	Lipids	Secondary Bile Acid Metabolism	Sensitivity	MR Egger	3	0.96 (0.6-1.52)	0.88053	-	4	0.97 (0.88-1.06)	0.530373	-	15	1.01 (0.86-1.19)	0.862087	-	-	-	-	-	-	-
	glycocholenate sulfate	-	-	-	-	-	Lipids	Secondary Bile Acid Metabolism	Sensitivity	Weighted median	3	1.02 (0.94-1.11)	0.571536	-	4	1.01 (0.98-1.03)	0.601801	-	15	1.01 (0.91-1.12)	0.911583	-	-	-	-	-	-	-
	glycocholenate sulfate	-	-	-	-	-	Lipids	Secondary Bile Acid Metabolism	Sensitivity	Weighted mode	3	1.02 (0.91-1.13)	0.784887	-	4	1.01 (0.98-1.03)	0.700789	-	15	1 (0.88-1.13)	0.991311	-	-	-	-	-	-	-
	glycodeoxycholate	18477	HMDB00631	3035026	C05464	[H][C@]12CCC3C4CC[C@H]([C@H](C)CCC(=O)NCC(O)=O)[C@@]4(C)[C@@H](O)CC3[C@@]1(C)CC[C@@H](O)C2	Lipids	Secondary Bile Acid Metabolism	Primary	Inverse variance weighted (random effects)/ Wald ratio	-	-	-	-	1	0.98 (0.93-1.04)	0.512577	0.845067	2	1.32 (0.93-1.87)	0.12048	0.547133	2	0.99 (0.94-1.05)	0.690454	0.886217	62.703	0.101541
	glycodeoxycholate	18477	HMDB00631	3035026	C05464	[H][C@]12CCC3C4CC[C@H]([C@H](C)CCC(=O)NCC(O)=O)[C@@]4(C)[C@@H](O)CC3[C@@]1(C)CC[C@@H](O)C2	Lipids	Secondary Bile Acid Metabolism	Sensitivity	Inverse variance weighted (fixed effects)	-	-	-	-	-	-	-	-	2	1.32 (0.99-1.75)	0.054952	-	-	-	-	-	-	-
	glycodeoxycholate	18477	HMDB00631	3035026	C05464	[H][C@]12CCC3C4CC[C@H]([C@H](C)CCC(=O)NCC(O)=O)[C@@]4(C)[C@@H](O)CC3[C@@]1(C)CC[C@@H](O)C2	Lipids	Secondary Bile Acid Metabolism	Sensitivity	Inverse variance weighted (multiplicative random effects)	-	-	-	-	-	-	-	-	2	1.32 (0.93-1.87)	0.12048	-	-	-	-	-	-	-
	glycodeoxycholate sulfate	-	-	-	-	-	Lipids	Secondary Bile Acid Metabolism	Primary	Inverse variance weighted (random effects)/ Wald ratio	-	-	-	-	-	-	-	-	6	0.98 (0.87-1.1)	0.710798	0.994872	-	-	-	-	-	-
	glycodeoxycholate sulfate	-	-	-	-	-	Lipids	Secondary Bile Acid Metabolism	Sensitivity	Inverse variance weighted (fixed effects)	-	-	-	-	-	-	-	-	6	0.98 (0.87-1.1)	0.710798	-	-	-	-	-	-	-
	glycodeoxycholate sulfate	-	-	-	-	-	Lipids	Secondary Bile Acid Metabolism	Sensitivity	Inverse variance weighted (multiplicative random effects)	-	-	-	-	-	-	-	-	6	0.98 (0.88-1.09)	0.674571	-	-	-	-	-	-	-
	glycodeoxycholate sulfate	-	-	-	-	-	Lipids	Secondary Bile Acid Metabolism	Sensitivity	MR Egger	-	-	-	-	-	-	-	-	6	1.02 (0.67-1.55)	0.939865	-	-	-	-	-	-	-
	glycodeoxycholate sulfate	-	-	-	-	-	Lipids	Secondary Bile Acid Metabolism	Sensitivity	Weighted median	-	-	-	-	-	-	-	-	6	1.01 (0.87-1.16)	0.908881	-	-	-	-	-	-	-
	glycodeoxycholate sulfate	-	-	-	-	-	Lipids	Secondary Bile Acid Metabolism	Sensitivity	Weighted mode	-	-	-	-	-	-	-	-	6	1.02 (0.86-1.19)	0.856467	-	-	-	-	-	-	-
	glycohyocholate	42574	-	-	-	-	Lipids	Secondary Bile Acid Metabolism	Primary	Inverse variance weighted (random effects)/ Wald ratio	-	-	-	-	-	-	-	-	1	0.95 (0.62-1.46)	0.824035	0.994872	-	-	-	-	-	-
	glycolithocholate sulfate*	32620	HMDB02639	72222	C11301	[H][C@@]1(CC[C@@]2([H])[C@]3([H])CC[C@]4([H])C[C@@H](CC[C@]4(C)[C@@]3([H])CC[C@]12C)OS(O)(=O)=O)[C@H](C)CCC(=O)NCC(O)=O	Lipids	Secondary Bile Acid Metabolism	Primary	Inverse variance weighted (random effects)/ Wald ratio	-	-	-	-	-	-	-	-	2	0.87 (0.64-1.19)	0.393134	0.977965	-	-	-	-	-	-
	glycolithocholate sulfate*	32620	HMDB02639	72222	C11301	[H][C@@]1(CC[C@@]2([H])[C@]3([H])CC[C@]4([H])C[C@@H](CC[C@]4(C)[C@@]3([H])CC[C@]12C)OS(O)(=O)=O)[C@H](C)CCC(=O)NCC(O)=O	Lipids	Secondary Bile Acid Metabolism	Sensitivity	Inverse variance weighted (fixed effects)	-	-	-	-	-	-	-	-	2	0.87 (0.65-1.17)	0.36422	-	-	-	-	-	-	-
	glycolithocholate sulfate*	32620	HMDB02639	72222	C11301	[H][C@@]1(CC[C@@]2([H])[C@]3([H])CC[C@]4([H])C[C@@H](CC[C@]4(C)[C@@]3([H])CC[C@]12C)OS(O)(=O)=O)[C@H](C)CCC(=O)NCC(O)=O	Lipids	Secondary Bile Acid Metabolism	Sensitivity	Inverse variance weighted (multiplicative random effects)	-	-	-	-	-	-	-	-	2	0.87 (0.64-1.19)	0.393134	-	-	-	-	-	-	-
	glycosyl ceramide (d18:1/20:0, d16:1/22:0)*	57595	-	-	-	-	Lipids	Ceramides	Primary	Inverse variance weighted (random effects)/ Wald ratio	-	-	-	-	-	-	-	-	7	0.99 (0.87-1.13)	0.871379	0.997496	-	-	-	-	-	-
	glycosyl ceramide (d18:1/20:0, d16:1/22:0)*	57595	-	-	-	-	Lipids	Ceramides	Sensitivity	Inverse variance weighted (fixed effects)	-	-	-	-	-	-	-	-	7	0.99 (0.87-1.12)	0.864769	-	-	-	-	-	-	-
	glycosyl ceramide (d18:1/20:0, d16:1/22:0)*	57595	-	-	-	-	Lipids	Ceramides	Sensitivity	Inverse variance weighted (multiplicative random effects)	-	-	-	-	-	-	-	-	7	0.99 (0.87-1.13)	0.871379	-	-	-	-	-	-	-
	glycosyl ceramide (d18:1/20:0, d16:1/22:0)*	57595	-	-	-	-	Lipids	Ceramides	Sensitivity	MR Egger	-	-	-	-	-	-	-	-	7	1.21 (0.69-2.1)	0.537374	-	-	-	-	-	-	-
	glycosyl ceramide (d18:1/20:0, d16:1/22:0)*	57595	-	-	-	-	Lipids	Ceramides	Sensitivity	Weighted median	-	-	-	-	-	-	-	-	7	1.03 (0.87-1.22)	0.705728	-	-	-	-	-	-	-
	glycosyl ceramide (d18:1/20:0, d16:1/22:0)*	57595	-	-	-	-	Lipids	Ceramides	Sensitivity	Weighted mode	-	-	-	-	-	-	-	-	7	1.03 (0.78-1.36)	0.854982	-	-	-	-	-	-	-
	glycosyl ceramide (d18:2/24:1, d18:1/24:2)*	57453	-	-	-	-	Lipids	Ceramides	Primary	Inverse variance weighted (random effects)/ Wald ratio	-	-	-	-	-	-	-	-	2	1.07 (0.87-1.32)	0.501944	0.993849	-	-	-	-	-	-
	glycosyl ceramide (d18:2/24:1, d18:1/24:2)*	57453	-	-	-	-	Lipids	Ceramides	Sensitivity	Inverse variance weighted (fixed effects)	-	-	-	-	-	-	-	-	2	1.07 (0.87-1.32)	0.501944	-	-	-	-	-	-	-
	glycosyl ceramide (d18:2/24:1, d18:1/24:2)*	57453	-	-	-	-	Lipids	Ceramides	Sensitivity	Inverse variance weighted (multiplicative random effects)	-	-	-	-	-	-	-	-	2	1.07 (1.05-1.09)	4.28525e-15	-	-	-	-	-	-	-
	glycosyl-N-(2-hydroxynervonoyl)-sphingosine (d18:1/24:1(2OH))*	57444	-	-	-	-	Lipids	Ceramides	Primary	Inverse variance weighted (random effects)/ Wald ratio	-	-	-	-	-	-	-	-	3	0.95 (0.81-1.12)	0.562816	0.994872	-	-	-	-	-	-
	glycosyl-N-(2-hydroxynervonoyl)-sphingosine (d18:1/24:1(2OH))*	57444	-	-	-	-	Lipids	Ceramides	Sensitivity	Inverse variance weighted (fixed effects)	-	-	-	-	-	-	-	-	3	0.95 (0.81-1.12)	0.562816	-	-	-	-	-	-	-
	glycosyl-N-(2-hydroxynervonoyl)-sphingosine (d18:1/24:1(2OH))*	57444	-	-	-	-	Lipids	Ceramides	Sensitivity	Inverse variance weighted (multiplicative random effects)	-	-	-	-	-	-	-	-	3	0.95 (0.85-1.07)	0.406947	-	-	-	-	-	-	-
	glycosyl-N-(2-hydroxynervonoyl)-sphingosine (d18:1/24:1(2OH))*	57444	-	-	-	-	Lipids	Ceramides	Sensitivity	MR Egger	-	-	-	-	-	-	-	-	3	1.09 (0.72-1.67)	0.749573	-	-	-	-	-	-	-
	glycosyl-N-(2-hydroxynervonoyl)-sphingosine (d18:1/24:1(2OH))*	57444	-	-	-	-	Lipids	Ceramides	Sensitivity	Weighted median	-	-	-	-	-	-	-	-	3	0.96 (0.81-1.15)	0.684195	-	-	-	-	-	-	-
	glycosyl-N-(2-hydroxynervonoyl)-sphingosine (d18:1/24:1(2OH))*	57444	-	-	-	-	Lipids	Ceramides	Sensitivity	Weighted mode	-	-	-	-	-	-	-	-	3	1 (0.82-1.2)	0.96447	-	-	-	-	-	-	-
	glycosyl-N-palmitoyl-sphingosine (d18:1/16:0)	53013	-	-	-	-	Lipids	Ceramides	Primary	Inverse variance weighted (random effects)/ Wald ratio	-	-	-	-	-	-	-	-	12	1.05 (0.96-1.15)	0.303639	0.868793	-	-	-	-	-	-
	glycosyl-N-palmitoyl-sphingosine (d18:1/16:0)	53013	-	-	-	-	Lipids	Ceramides	Sensitivity	Inverse variance weighted (fixed effects)	-	-	-	-	-	-	-	-	12	1.05 (0.96-1.15)	0.303639	-	-	-	-	-	-	-
	glycosyl-N-palmitoyl-sphingosine (d18:1/16:0)	53013	-	-	-	-	Lipids	Ceramides	Sensitivity	Inverse variance weighted (multiplicative random effects)	-	-	-	-	-	-	-	-	12	1.05 (0.98-1.13)	0.188433	-	-	-	-	-	-	-
	glycosyl-N-palmitoyl-sphingosine (d18:1/16:0)	53013	-	-	-	-	Lipids	Ceramides	Sensitivity	MR Egger	-	-	-	-	-	-	-	-	12	1.2 (0.9-1.59)	0.236522	-	-	-	-	-	-	-
	glycosyl-N-palmitoyl-sphingosine (d18:1/16:0)	53013	-	-	-	-	Lipids	Ceramides	Sensitivity	Weighted median	-	-	-	-	-	-	-	-	12	1.05 (0.93-1.19)	0.433992	-	-	-	-	-	-	-
	glycosyl-N-palmitoyl-sphingosine (d18:1/16:0)	53013	-	-	-	-	Lipids	Ceramides	Sensitivity	Weighted mode	-	-	-	-	-	-	-	-	12	1.05 (0.91-1.22)	0.52442	-	-	-	-	-	-	-
	glycosyl-N-stearoyl-sphingosine (d18:1/18:0)	52234	-	-	-	-	Lipids	Ceramides	Primary	Inverse variance weighted (random effects)/ Wald ratio	-	-	-	-	-	-	-	-	1	1.09 (0.82-1.45)	0.543169	0.994872	-	-	-	-	-	-
	glycylphenylalanine	33954	HMDB0028848	97415	-	NCC(O)=NC(CC1=CC=CC=C1)C(O)=O	Peptides	Dipeptide	Primary	Inverse variance weighted (random effects)/ Wald ratio	1	1.04 (0.92-1.16)	0.543216	0.863348	1	0.97 (0.92-1.01)	0.110853	0.3456	-	-	-	-	2	0.97 (0.94-1.01)	0.200098	0.5461	21.2514	0.259792
	glycylvaline	18357	HMDB28854	97417	-	CC(C)[C@H](NC(=O)CN)C(O)=O	Peptides	Dipeptide	Primary	Inverse variance weighted (random effects)/ Wald ratio	-	-	-	-	1	1.06 (0.99-1.13)	0.07535	0.29103	-	-	-	-	-	-	-	-	-	-
	guanidinoacetate	43802	HMDB00128	763	C00581	NC(=N)NCC(O)=O	Amino Acids	Creatine Metabolism	Primary	Inverse variance weighted (random effects)/ Wald ratio	-	-	-	-	-	-	-	-	3	0.88 (0.66-1.18)	0.383034	0.972316	-	-	-	-	-	-
	guanidinoacetate	43802	HMDB00128	763	C00581	NC(=N)NCC(O)=O	Amino Acids	Creatine Metabolism	Sensitivity	Inverse variance weighted (fixed effects)	-	-	-	-	-	-	-	-	3	0.88 (0.7-1.1)	0.261615	-	-	-	-	-	-	-
	guanidinoacetate	43802	HMDB00128	763	C00581	NC(=N)NCC(O)=O	Amino Acids	Creatine Metabolism	Sensitivity	Inverse variance weighted (multiplicative random effects)	-	-	-	-	-	-	-	-	3	0.88 (0.66-1.18)	0.383034	-	-	-	-	-	-	-
	guanidinoacetate	43802	HMDB00128	763	C00581	NC(=N)NCC(O)=O	Amino Acids	Creatine Metabolism	Sensitivity	MR Egger	-	-	-	-	-	-	-	-	3	0.73 (0.09-6)	0.818084	-	-	-	-	-	-	-
	guanidinoacetate	43802	HMDB00128	763	C00581	NC(=N)NCC(O)=O	Amino Acids	Creatine Metabolism	Sensitivity	Weighted median	-	-	-	-	-	-	-	-	3	0.92 (0.7-1.22)	0.56888	-	-	-	-	-	-	-
	guanidinoacetate	43802	HMDB00128	763	C00581	NC(=N)NCC(O)=O	Amino Acids	Creatine Metabolism	Sensitivity	Weighted mode	-	-	-	-	-	-	-	-	3	0.95 (0.69-1.3)	0.767709	-	-	-	-	-	-	-
	guanidinosuccinate	32446	HMDB03157	439918	C03139	NC(=N)N[C@@H](CC(O)=O)C(O)=O	Amino Acids	Guanidino and Acetamido Metabolism	Primary	Inverse variance weighted (random effects)/ Wald ratio	-	-	-	-	-	-	-	-	1	0.86 (0.59-1.27)	0.452026	0.987241	-	-	-	-	-	-
	guanosine	1573	HMDB00133	6802	C00387	NC1=NC2=C(N=CN2[C@@H]2O[C@H](CO)[C@@H](O)[C@H]2O)C(=O)N1	Nucleotides	Purine Metabolism, Guanine containing	Primary	Inverse variance weighted (random effects)/ Wald ratio	1	0.9 (0.77-1.05)	0.177905	0.863252	-	-	-	-	4	0.99 (0.81-1.2)	0.889294	0.997496	2	0.93 (0.83-1.05)	0.250215	0.622347	0	0.47417
	guanosine	1573	HMDB00133	6802	C00387	NC1=NC2=C(N=CN2[C@@H]2O[C@H](CO)[C@@H](O)[C@H]2O)C(=O)N1	Nucleotides	Purine Metabolism, Guanine containing	Sensitivity	Inverse variance weighted (fixed effects)	-	-	-	-	-	-	-	-	4	0.99 (0.81-1.2)	0.889294	-	-	-	-	-	-	-
	guanosine	1573	HMDB00133	6802	C00387	NC1=NC2=C(N=CN2[C@@H]2O[C@H](CO)[C@@H](O)[C@H]2O)C(=O)N1	Nucleotides	Purine Metabolism, Guanine containing	Sensitivity	Inverse variance weighted (multiplicative random effects)	-	-	-	-	-	-	-	-	4	0.99 (0.83-1.17)	0.876062	-	-	-	-	-	-	-
	guanosine	1573	HMDB00133	6802	C00387	NC1=NC2=C(N=CN2[C@@H]2O[C@H](CO)[C@@H](O)[C@H]2O)C(=O)N1	Nucleotides	Purine Metabolism, Guanine containing	Sensitivity	MR Egger	-	-	-	-	-	-	-	-	4	0.75 (0.36-1.54)	0.514866	-	-	-	-	-	-	-
	guanosine	1573	HMDB00133	6802	C00387	NC1=NC2=C(N=CN2[C@@H]2O[C@H](CO)[C@@H](O)[C@H]2O)C(=O)N1	Nucleotides	Purine Metabolism, Guanine containing	Sensitivity	Weighted median	-	-	-	-	-	-	-	-	4	0.97 (0.76-1.22)	0.778358	-	-	-	-	-	-	-
	guanosine	1573	HMDB00133	6802	C00387	NC1=NC2=C(N=CN2[C@@H]2O[C@H](CO)[C@@H](O)[C@H]2O)C(=O)N1	Nucleotides	Purine Metabolism, Guanine containing	Sensitivity	Weighted mode	-	-	-	-	-	-	-	-	4	0.94 (0.69-1.27)	0.698253	-	-	-	-	-	-	-
	heptanoate (7:0)	1644	HMDB00666	8094	C17714	CCCCCCC(O)=O	Lipids	Medium Chain Fatty Acid	Primary	Inverse variance weighted (random effects)/ Wald ratio	-	-	-	-	1	0.95 (0.9-1)	0.0394058	0.242636	-	-	-	-	-	-	-	-	-	-
	hexadecanedioate	35678	HMDB00672	10459	C19615	OC(=O)CCCCCCCCCCCCCCC(O)=O	Lipids	Fatty Acid, Dicarboxylate	Primary	Inverse variance weighted (random effects)/ Wald ratio	5	1.1 (1.05-1.16)	0.000186593	0.0244437	2	1.01 (0.98-1.03)	0.695613	0.898033	7	1 (0.9-1.11)	0.975552	0.999026	3	1.02 (1-1.05)	0.0430246	0.195479	80.041	0.00666906
	hexadecanedioate	35678	HMDB00672	10459	C19615	OC(=O)CCCCCCCCCCCCCCC(O)=O	Lipids	Fatty Acid, Dicarboxylate	Sensitivity	Inverse variance weighted (fixed effects)	5	1.1 (1.05-1.16)	0.000102584	-	2	1.01 (0.98-1.03)	0.695613	-	7	1 (0.9-1.11)	0.975552	-	-	-	-	-	-	-
	hexadecanedioate	35678	HMDB00672	10459	C19615	OC(=O)CCCCCCCCCCCCCCC(O)=O	Lipids	Fatty Acid, Dicarboxylate	Sensitivity	Inverse variance weighted (multiplicative random effects)	5	1.1 (1.05-1.16)	0.000186593	-	2	1.01 (0.99-1.02)	0.350526	-	7	1 (0.94-1.07)	0.960924	-	-	-	-	-	-	-
	hexadecanedioate	35678	HMDB00672	10459	C19615	OC(=O)CCCCCCCCCCCCCCC(O)=O	Lipids	Fatty Acid, Dicarboxylate	Sensitivity	MR Egger	5	1.05 (0.91-1.21)	0.538117	-	-	-	-	-	7	1.05 (0.82-1.34)	0.73035	-	-	-	-	-	-	-
	hexadecanedioate	35678	HMDB00672	10459	C19615	OC(=O)CCCCCCCCCCCCCCC(O)=O	Lipids	Fatty Acid, Dicarboxylate	Sensitivity	Weighted median	5	1.13 (1.06-1.2)	0.00010465	-	-	-	-	-	7	0.99 (0.87-1.12)	0.828975	-	-	-	-	-	-	-
	hexadecanedioate	35678	HMDB00672	10459	C19615	OC(=O)CCCCCCCCCCCCCCC(O)=O	Lipids	Fatty Acid, Dicarboxylate	Sensitivity	Weighted mode	5	1.14 (1.06-1.22)	0.0276879	-	-	-	-	-	7	0.99 (0.85-1.14)	0.859977	-	-	-	-	-	-	-
	hexanoylcarnitine (C6)	32328	HMDB00705	6426853	-	-	Lipids	Fatty Acid Metabolism (Acyl Carnitine)	Primary	Inverse variance weighted (random effects)/ Wald ratio	4	1 (0.94-1.07)	0.917994	0.969816	2	0.97 (0.94-1.01)	0.146779	0.388965	6	1.02 (0.92-1.13)	0.691728	0.994872	3	0.98 (0.96-1.01)	0.285596	0.640985	0	0.567542
	hexanoylcarnitine (C6)	32328	HMDB00705	6426853	-	-	Lipids	Fatty Acid Metabolism (Acyl Carnitine)	Sensitivity	Inverse variance weighted (fixed effects)	4	1 (0.94-1.07)	0.917994	-	2	0.97 (0.94-1.01)	0.146779	-	6	1.02 (0.92-1.13)	0.691728	-	-	-	-	-	-	-
	hexanoylcarnitine (C6)	32328	HMDB00705	6426853	-	-	Lipids	Fatty Acid Metabolism (Acyl Carnitine)	Sensitivity	Inverse variance weighted (multiplicative random effects)	4	1 (0.96-1.05)	0.877259	-	2	0.97 (0.96-0.99)	0.00226631	-	6	1.02 (0.98-1.07)	0.374664	-	-	-	-	-	-	-
	hexanoylcarnitine (C6)	32328	HMDB00705	6426853	-	-	Lipids	Fatty Acid Metabolism (Acyl Carnitine)	Sensitivity	MR Egger	4	1.23 (0.83-1.83)	0.414084	-	-	-	-	-	6	0.95 (0.71-1.27)	0.759425	-	-	-	-	-	-	-
	hexanoylcarnitine (C6)	32328	HMDB00705	6426853	-	-	Lipids	Fatty Acid Metabolism (Acyl Carnitine)	Sensitivity	Weighted median	4	1.01 (0.94-1.09)	0.725682	-	-	-	-	-	6	1.01 (0.9-1.14)	0.846868	-	-	-	-	-	-	-
	hexanoylcarnitine (C6)	32328	HMDB00705	6426853	-	-	Lipids	Fatty Acid Metabolism (Acyl Carnitine)	Sensitivity	Weighted mode	4	1.02 (0.92-1.13)	0.719639	-	-	-	-	-	6	1.01 (0.9-1.14)	0.855198	-	-	-	-	-	-	-
	hexanoylglutamine	54907	-	-	-	-	Lipids	Fatty Acid Metabolism (Acyl Glutamine)	Primary	Inverse variance weighted (random effects)/ Wald ratio	-	-	-	-	-	-	-	-	3	1.09 (0.96-1.24)	0.198347	0.710262	-	-	-	-	-	-
	hexanoylglutamine	54907	-	-	-	-	Lipids	Fatty Acid Metabolism (Acyl Glutamine)	Sensitivity	Inverse variance weighted (fixed effects)	-	-	-	-	-	-	-	-	3	1.09 (0.96-1.24)	0.198347	-	-	-	-	-	-	-
	hexanoylglutamine	54907	-	-	-	-	Lipids	Fatty Acid Metabolism (Acyl Glutamine)	Sensitivity	Inverse variance weighted (multiplicative random effects)	-	-	-	-	-	-	-	-	3	1.09 (1.02-1.16)	0.0116244	-	-	-	-	-	-	-
	hexanoylglutamine	54907	-	-	-	-	Lipids	Fatty Acid Metabolism (Acyl Glutamine)	Sensitivity	MR Egger	-	-	-	-	-	-	-	-	3	1.28 (0.72-2.3)	0.556139	-	-	-	-	-	-	-
	hexanoylglutamine	54907	-	-	-	-	Lipids	Fatty Acid Metabolism (Acyl Glutamine)	Sensitivity	Weighted median	-	-	-	-	-	-	-	-	3	1.09 (0.94-1.26)	0.245451	-	-	-	-	-	-	-
	hexanoylglutamine	54907	-	-	-	-	Lipids	Fatty Acid Metabolism (Acyl Glutamine)	Sensitivity	Weighted mode	-	-	-	-	-	-	-	-	3	1.13 (0.95-1.33)	0.298993	-	-	-	-	-	-	-
	hippurate	15753	HMDB00714	464	C01586	OC(=O)CNC(=O)C1=CC=CC=C1	Xenobiotics	Benzoate Metabolism	Primary	Inverse variance weighted (random effects)/ Wald ratio	1	0.93 (0.79-1.09)	0.350945	0.863252	-	-	-	-	-	-	-	-	-	-	-	-	-	-
	histidine	59	HMDB00177	6274	C00135	N[C@@H](CC1=CN=CN1)C(O)=O	Amino Acids	Histidine Metabolism	Primary	Inverse variance weighted (random effects)/ Wald ratio	-	-	-	-	-	-	-	-	2	0.93 (0.63-1.36)	0.697376	0.994872	-	-	-	-	-	-
	histidine	59	HMDB00177	6274	C00135	N[C@@H](CC1=CN=CN1)C(O)=O	Amino Acids	Histidine Metabolism	Sensitivity	Inverse variance weighted (fixed effects)	-	-	-	-	-	-	-	-	2	0.93 (0.63-1.36)	0.697376	-	-	-	-	-	-	-
	histidine	59	HMDB00177	6274	C00135	N[C@@H](CC1=CN=CN1)C(O)=O	Amino Acids	Histidine Metabolism	Sensitivity	Inverse variance weighted (multiplicative random effects)	-	-	-	-	-	-	-	-	2	0.93 (0.85-1.02)	0.108249	-	-	-	-	-	-	-
	homoarginine	22137	HMDB00670	9085	C01924	N[C@@H](CCCCNC(N)=N)C(O)=O	Amino Acids	Urea cycle; Arginine and Proline Metabolism	Primary	Inverse variance weighted (random effects)/ Wald ratio	-	-	-	-	-	-	-	-	7	0.88 (0.77-1)	0.0449075	0.29249	-	-	-	-	-	-
	homoarginine	22137	HMDB00670	9085	C01924	N[C@@H](CCCCNC(N)=N)C(O)=O	Amino Acids	Urea cycle; Arginine and Proline Metabolism	Sensitivity	Inverse variance weighted (fixed effects)	-	-	-	-	-	-	-	-	7	0.88 (0.78-0.98)	0.0242199	-	-	-	-	-	-	-
	homoarginine	22137	HMDB00670	9085	C01924	N[C@@H](CCCCNC(N)=N)C(O)=O	Amino Acids	Urea cycle; Arginine and Proline Metabolism	Sensitivity	Inverse variance weighted (multiplicative random effects)	-	-	-	-	-	-	-	-	7	0.88 (0.77-1)	0.0449075	-	-	-	-	-	-	-
	homoarginine	22137	HMDB00670	9085	C01924	N[C@@H](CCCCNC(N)=N)C(O)=O	Amino Acids	Urea cycle; Arginine and Proline Metabolism	Sensitivity	MR Egger	-	-	-	-	-	-	-	-	7	1.1 (0.75-1.6)	0.646728	-	-	-	-	-	-	-
	homoarginine	22137	HMDB00670	9085	C01924	N[C@@H](CCCCNC(N)=N)C(O)=O	Amino Acids	Urea cycle; Arginine and Proline Metabolism	Sensitivity	Weighted median	-	-	-	-	-	-	-	-	7	0.88 (0.76-1.03)	0.11801	-	-	-	-	-	-	-
	homoarginine	22137	HMDB00670	9085	C01924	N[C@@H](CCCCNC(N)=N)C(O)=O	Amino Acids	Urea cycle; Arginine and Proline Metabolism	Sensitivity	Weighted mode	-	-	-	-	-	-	-	-	7	0.89 (0.74-1.07)	0.253607	-	-	-	-	-	-	-
	homocitrulline	22138	HMDB00679	65072	C02427	N[C@@H](CCCCNC(N)=O)C(O)=O	Amino Acids	Urea cycle; Arginine and Proline Metabolism	Primary	Inverse variance weighted (random effects)/ Wald ratio	-	-	-	-	2	0.99 (0.95-1.03)	0.553519	0.856985	3	1.04 (0.87-1.24)	0.671128	0.994872	2	0.99 (0.96-1.03)	0.618044	0.856655	0	0.594944
	homocitrulline	22138	HMDB00679	65072	C02427	N[C@@H](CCCCNC(N)=O)C(O)=O	Amino Acids	Urea cycle; Arginine and Proline Metabolism	Sensitivity	Inverse variance weighted (fixed effects)	-	-	-	-	2	0.99 (0.96-1.02)	0.503436	-	3	1.04 (0.87-1.24)	0.671128	-	-	-	-	-	-	-
	homocitrulline	22138	HMDB00679	65072	C02427	N[C@@H](CCCCNC(N)=O)C(O)=O	Amino Acids	Urea cycle; Arginine and Proline Metabolism	Sensitivity	Inverse variance weighted (multiplicative random effects)	-	-	-	-	2	0.99 (0.95-1.03)	0.553519	-	3	1.04 (0.87-1.24)	0.670368	-	-	-	-	-	-	-
	homocitrulline	22138	HMDB00679	65072	C02427	N[C@@H](CCCCNC(N)=O)C(O)=O	Amino Acids	Urea cycle; Arginine and Proline Metabolism	Sensitivity	MR Egger	-	-	-	-	-	-	-	-	3	0.74 (0.31-1.79)	0.625221	-	-	-	-	-	-	-
	homocitrulline	22138	HMDB00679	65072	C02427	N[C@@H](CCCCNC(N)=O)C(O)=O	Amino Acids	Urea cycle; Arginine and Proline Metabolism	Sensitivity	Weighted median	-	-	-	-	-	-	-	-	3	0.98 (0.81-1.2)	0.878985	-	-	-	-	-	-	-
	homocitrulline	22138	HMDB00679	65072	C02427	N[C@@H](CCCCNC(N)=O)C(O)=O	Amino Acids	Urea cycle; Arginine and Proline Metabolism	Sensitivity	Weighted mode	-	-	-	-	-	-	-	-	3	0.98 (0.78-1.22)	0.851748	-	-	-	-	-	-	-
	homostachydrine*	33009	HMDB33433	441447	C08283	C[N+]1(C)CCC[C@H]1C([O-])=O	Xenobiotics	Food Component/Plant	Primary	Inverse variance weighted (random effects)/ Wald ratio	-	-	-	-	-	-	-	-	1	1.01 (0.72-1.42)	0.96788	0.999026	-	-	-	-	-	-
	hydantoin-5-propionic acid	40473	HMDB01212	782	C05565	OC(=O)CCC1NC(=O)NC1=O	Amino Acids	Histidine Metabolism	Primary	Inverse variance weighted (random effects)/ Wald ratio	-	-	-	-	-	-	-	-	2	1.03 (0.76-1.4)	0.842927	0.997496	-	-	-	-	-	-
	hydantoin-5-propionic acid	40473	HMDB01212	782	C05565	OC(=O)CCC1NC(=O)NC1=O	Amino Acids	Histidine Metabolism	Sensitivity	Inverse variance weighted (fixed effects)	-	-	-	-	-	-	-	-	2	1.03 (0.76-1.4)	0.842927	-	-	-	-	-	-	-
	hydantoin-5-propionic acid	40473	HMDB01212	782	C05565	OC(=O)CCC1NC(=O)NC1=O	Amino Acids	Histidine Metabolism	Sensitivity	Inverse variance weighted (multiplicative random effects)	-	-	-	-	-	-	-	-	2	1.03 (0.8-1.32)	0.807151	-	-	-	-	-	-	-
	hypotaurine	590	HMDB00965	107812	C00519	NCCS(O)=O	Amino Acids	Methionine, Cysteine, SAM and Taurine Metabolism	Primary	Inverse variance weighted (random effects)/ Wald ratio	-	-	-	-	-	-	-	-	1	0.98 (0.7-1.37)	0.913919	0.998653	-	-	-	-	-	-
	imidazole lactate	15716	HMDB02320	440129	C05568	OC(CN1C=CN=C1)C(O)=O	Amino Acids	Histidine Metabolism	Primary	Inverse variance weighted (random effects)/ Wald ratio	-	-	-	-	-	-	-	-	14	1.02 (0.91-1.14)	0.760054	0.994872	-	-	-	-	-	-
	imidazole lactate	15716	HMDB02320	440129	C05568	OC(CN1C=CN=C1)C(O)=O	Amino Acids	Histidine Metabolism	Sensitivity	Inverse variance weighted (fixed effects)	-	-	-	-	-	-	-	-	14	1.02 (0.94-1.1)	0.669023	-	-	-	-	-	-	-
	imidazole lactate	15716	HMDB02320	440129	C05568	OC(CN1C=CN=C1)C(O)=O	Amino Acids	Histidine Metabolism	Sensitivity	Inverse variance weighted (multiplicative random effects)	-	-	-	-	-	-	-	-	14	1.02 (0.91-1.14)	0.760054	-	-	-	-	-	-	-
	imidazole lactate	15716	HMDB02320	440129	C05568	OC(CN1C=CN=C1)C(O)=O	Amino Acids	Histidine Metabolism	Sensitivity	MR Egger	-	-	-	-	-	-	-	-	14	0.95 (0.69-1.31)	0.764887	-	-	-	-	-	-	-
	imidazole lactate	15716	HMDB02320	440129	C05568	OC(CN1C=CN=C1)C(O)=O	Amino Acids	Histidine Metabolism	Sensitivity	Weighted median	-	-	-	-	-	-	-	-	14	0.96 (0.86-1.08)	0.489711	-	-	-	-	-	-	-
	imidazole lactate	15716	HMDB02320	440129	C05568	OC(CN1C=CN=C1)C(O)=O	Amino Acids	Histidine Metabolism	Sensitivity	Weighted mode	-	-	-	-	-	-	-	-	14	1 (0.89-1.12)	0.959938	-	-	-	-	-	-	-
	imidazole propionate	40730	HMDB02271	70630	C20522	OC(=O)CCC1=CNC=N1	Amino Acids	Histidine Metabolism	Primary	Inverse variance weighted (random effects)/ Wald ratio	-	-	-	-	-	-	-	-	1	1.11 (0.73-1.67)	0.627688	0.994872	-	-	-	-	-	-
	indole-3-carboxylic acid	38116	HMDB03320	69867	C19837	OC(=O)C1=CNC2=CC=CC=C12	Amino Acids	Tryptophan Metabolism	Primary	Inverse variance weighted (random effects)/ Wald ratio	-	-	-	-	-	-	-	-	1	0.85 (0.43-1.69)	0.644208	0.994872	-	-	-	-	-	-
	indoleacetate	27513	HMDB00197	802	C00954	OC(=O)CC1=CNC2=C1C=CC=C2	Amino Acids	Tryptophan Metabolism	Primary	Inverse variance weighted (random effects)/ Wald ratio	1	1.08 (0.92-1.26)	0.367364	0.863252	-	-	-	-	1	3.49 (1.64-7.46)	0.00123718	0.023554	2	1.13 (0.97-1.32)	0.12257	0.411711	88.7158	0.00291174
	indoleacetylglutamine	42087	HMDB13240	25200879	-	NC(=O)CCC(NC(=O)CC1=CNC2=CC=CC=C12)C(O)=O	Amino Acids	Tryptophan Metabolism	Primary	Inverse variance weighted (random effects)/ Wald ratio	-	-	-	-	-	-	-	-	2	0.84 (0.69-1.03)	0.102097	0.510487	-	-	-	-	-	-
	indoleacetylglutamine	42087	HMDB13240	25200879	-	NC(=O)CCC(NC(=O)CC1=CNC2=CC=CC=C12)C(O)=O	Amino Acids	Tryptophan Metabolism	Sensitivity	Inverse variance weighted (fixed effects)	-	-	-	-	-	-	-	-	2	0.84 (0.69-1.03)	0.102097	-	-	-	-	-	-	-
	indoleacetylglutamine	42087	HMDB13240	25200879	-	NC(=O)CCC(NC(=O)CC1=CNC2=CC=CC=C12)C(O)=O	Amino Acids	Tryptophan Metabolism	Sensitivity	Inverse variance weighted (multiplicative random effects)	-	-	-	-	-	-	-	-	2	0.84 (0.7-1.01)	0.0651311	-	-	-	-	-	-	-
	indolelactate	18349	HMDB00671	92904	C02043	O[C@@H](CC1=CNC2=C1C=CC=C2)C(O)=O	Amino Acids	Tryptophan Metabolism	Primary	Inverse variance weighted (random effects)/ Wald ratio	2	0.96 (0.86-1.07)	0.456737	0.863252	-	-	-	-	1	0.8 (0.55-1.16)	0.233108	0.764161	2	0.95 (0.86-1.05)	0.296508	0.647375	0	0.346627
	indolelactate	18349	HMDB00671	92904	C02043	O[C@@H](CC1=CNC2=C1C=CC=C2)C(O)=O	Amino Acids	Tryptophan Metabolism	Sensitivity	Inverse variance weighted (fixed effects)	2	0.96 (0.86-1.07)	0.456737	-	-	-	-	-	-	-	-	-	-	-	-	-	-	-
	indolelactate	18349	HMDB00671	92904	C02043	O[C@@H](CC1=CNC2=C1C=CC=C2)C(O)=O	Amino Acids	Tryptophan Metabolism	Sensitivity	Inverse variance weighted (multiplicative random effects)	2	0.96 (0.87-1.06)	0.417067	-	-	-	-	-	-	-	-	-	-	-	-	-	-	-
	indolepropionate	32405	HMDB02302	3744	-	OC(=O)CCC1=CNC2=C1C=CC=C2	Amino Acids	Tryptophan Metabolism	Primary	Inverse variance weighted (random effects)/ Wald ratio	1	0.94 (0.83-1.07)	0.370068	0.863252	1	1 (0.96-1.04)	0.922287	0.960725	5	1.08 (0.92-1.27)	0.344754	0.909772	3	1 (0.96-1.03)	0.896184	0.939606	0	0.429872
	indolepropionate	32405	HMDB02302	3744	-	OC(=O)CCC1=CNC2=C1C=CC=C2	Amino Acids	Tryptophan Metabolism	Sensitivity	Inverse variance weighted (fixed effects)	-	-	-	-	-	-	-	-	5	1.08 (0.92-1.27)	0.344754	-	-	-	-	-	-	-
	indolepropionate	32405	HMDB02302	3744	-	OC(=O)CCC1=CNC2=C1C=CC=C2	Amino Acids	Tryptophan Metabolism	Sensitivity	Inverse variance weighted (multiplicative random effects)	-	-	-	-	-	-	-	-	5	1.08 (0.95-1.23)	0.229836	-	-	-	-	-	-	-
	indolepropionate	32405	HMDB02302	3744	-	OC(=O)CCC1=CNC2=C1C=CC=C2	Amino Acids	Tryptophan Metabolism	Sensitivity	MR Egger	-	-	-	-	-	-	-	-	5	0.83 (0.49-1.41)	0.548087	-	-	-	-	-	-	-
	indolepropionate	32405	HMDB02302	3744	-	OC(=O)CCC1=CNC2=C1C=CC=C2	Amino Acids	Tryptophan Metabolism	Sensitivity	Weighted median	-	-	-	-	-	-	-	-	5	1.1 (0.91-1.34)	0.329926	-	-	-	-	-	-	-
	indolepropionate	32405	HMDB02302	3744	-	OC(=O)CCC1=CNC2=C1C=CC=C2	Amino Acids	Tryptophan Metabolism	Sensitivity	Weighted mode	-	-	-	-	-	-	-	-	5	1.11 (0.87-1.41)	0.443159	-	-	-	-	-	-	-
	inosine	1123	HMDB00195	6021	C00294	OC[C@H]1O[C@H]([C@H](O)[C@@H]1O)N1C=NC2=C(O)N=CN=C12	Nucleotides	Purine Metabolism, (Hypo)Xanthine/Inosine containing	Primary	Inverse variance weighted (random effects)/ Wald ratio	-	-	-	-	-	-	-	-	3	0.98 (0.78-1.23)	0.853427	0.997496	-	-	-	-	-	-
	inosine	1123	HMDB00195	6021	C00294	OC[C@H]1O[C@H]([C@H](O)[C@@H]1O)N1C=NC2=C(O)N=CN=C12	Nucleotides	Purine Metabolism, (Hypo)Xanthine/Inosine containing	Sensitivity	Inverse variance weighted (fixed effects)	-	-	-	-	-	-	-	-	3	0.98 (0.79-1.21)	0.841076	-	-	-	-	-	-	-
	inosine	1123	HMDB00195	6021	C00294	OC[C@H]1O[C@H]([C@H](O)[C@@H]1O)N1C=NC2=C(O)N=CN=C12	Nucleotides	Purine Metabolism, (Hypo)Xanthine/Inosine containing	Sensitivity	Inverse variance weighted (multiplicative random effects)	-	-	-	-	-	-	-	-	3	0.98 (0.78-1.23)	0.853427	-	-	-	-	-	-	-
	inosine	1123	HMDB00195	6021	C00294	OC[C@H]1O[C@H]([C@H](O)[C@@H]1O)N1C=NC2=C(O)N=CN=C12	Nucleotides	Purine Metabolism, (Hypo)Xanthine/Inosine containing	Sensitivity	MR Egger	-	-	-	-	-	-	-	-	3	0.59 (0.22-1.64)	0.498255	-	-	-	-	-	-	-
	inosine	1123	HMDB00195	6021	C00294	OC[C@H]1O[C@H]([C@H](O)[C@@H]1O)N1C=NC2=C(O)N=CN=C12	Nucleotides	Purine Metabolism, (Hypo)Xanthine/Inosine containing	Sensitivity	Weighted median	-	-	-	-	-	-	-	-	3	0.94 (0.73-1.22)	0.65661	-	-	-	-	-	-	-
	inosine	1123	HMDB00195	6021	C00294	OC[C@H]1O[C@H]([C@H](O)[C@@H]1O)N1C=NC2=C(O)N=CN=C12	Nucleotides	Purine Metabolism, (Hypo)Xanthine/Inosine containing	Sensitivity	Weighted mode	-	-	-	-	-	-	-	-	3	0.91 (0.66-1.26)	0.632167	-	-	-	-	-	-	-
	isobutyrylcarnitine (C4)	33441	HMDB00736	168379	-	CC(C)C(=O)O[C@H](CC(O)=O)C[N+](C)(C)C	Amino Acids	Leucine, Isoleucine and Valine Metabolism	Primary	Inverse variance weighted (random effects)/ Wald ratio	1	0.97 (0.85-1.11)	0.701592	0.878415	6	0.99 (0.91-1.06)	0.703177	0.898033	6	1.01 (0.89-1.14)	0.87023	0.997496	3	0.99 (0.93-1.05)	0.702983	0.886217	0	0.916999
	isobutyrylcarnitine (C4)	33441	HMDB00736	168379	-	CC(C)C(=O)O[C@H](CC(O)=O)C[N+](C)(C)C	Amino Acids	Leucine, Isoleucine and Valine Metabolism	Sensitivity	Inverse variance weighted (fixed effects)	-	-	-	-	6	0.99 (0.97-1)	0.118671	-	6	1.01 (0.89-1.14)	0.87023	-	-	-	-	-	-	-
	isobutyrylcarnitine (C4)	33441	HMDB00736	168379	-	CC(C)C(=O)O[C@H](CC(O)=O)C[N+](C)(C)C	Amino Acids	Leucine, Isoleucine and Valine Metabolism	Sensitivity	Inverse variance weighted (multiplicative random effects)	-	-	-	-	6	0.99 (0.91-1.06)	0.703177	-	6	1.01 (0.94-1.09)	0.796762	-	-	-	-	-	-	-
	isobutyrylcarnitine (C4)	33441	HMDB00736	168379	-	CC(C)C(=O)O[C@H](CC(O)=O)C[N+](C)(C)C	Amino Acids	Leucine, Isoleucine and Valine Metabolism	Sensitivity	MR Egger	-	-	-	-	6	1.13 (0.88-1.46)	0.382574	-	6	0.99 (0.76-1.29)	0.934098	-	-	-	-	-	-	-
	isobutyrylcarnitine (C4)	33441	HMDB00736	168379	-	CC(C)C(=O)O[C@H](CC(O)=O)C[N+](C)(C)C	Amino Acids	Leucine, Isoleucine and Valine Metabolism	Sensitivity	Weighted median	-	-	-	-	6	0.97 (0.94-1.01)	0.105176	-	6	1.01 (0.87-1.16)	0.915766	-	-	-	-	-	-	-
	isobutyrylcarnitine (C4)	33441	HMDB00736	168379	-	CC(C)C(=O)O[C@H](CC(O)=O)C[N+](C)(C)C	Amino Acids	Leucine, Isoleucine and Valine Metabolism	Sensitivity	Weighted mode	-	-	-	-	6	0.96 (0.92-0.99)	0.0748032	-	6	1.01 (0.86-1.19)	0.908912	-	-	-	-	-	-	-
	isobutyrylglycine	35437	HMDB00730	10855600		CC(C)C(=O)NCC(O)=O	Amino Acids	Leucine, Isoleucine and Valine Metabolism	Primary	Inverse variance weighted (random effects)/ Wald ratio	-	-	-	-	-	-	-	-	2	0.9 (0.71-1.12)	0.342172	0.909772	-	-	-	-	-	-
	isobutyrylglycine	35437	HMDB00730	10855600		CC(C)C(=O)NCC(O)=O	Amino Acids	Leucine, Isoleucine and Valine Metabolism	Sensitivity	Inverse variance weighted (fixed effects)	-	-	-	-	-	-	-	-	2	0.9 (0.71-1.12)	0.342172	-	-	-	-	-	-	-
	isobutyrylglycine	35437	HMDB00730	10855600		CC(C)C(=O)NCC(O)=O	Amino Acids	Leucine, Isoleucine and Valine Metabolism	Sensitivity	Inverse variance weighted (multiplicative random effects)	-	-	-	-	-	-	-	-	2	0.9 (0.76-1.06)	0.188803	-	-	-	-	-	-	-
	isoleucine	1125	HMDB00172	6306	C00407	CC[C@H](C)[C@H](N)C(O)=O	Amino Acids	Leucine, Isoleucine and Valine Metabolism	Primary	Inverse variance weighted (random effects)/ Wald ratio	2	0.99 (0.88-1.12)	0.887694	0.966361	-	-	-	-	-	-	-	-	-	-	-	-	-	-
	isoleucine	1125	HMDB00172	6306	C00407	CC[C@H](C)[C@H](N)C(O)=O	Amino Acids	Leucine, Isoleucine and Valine Metabolism	Sensitivity	Inverse variance weighted (fixed effects)	2	0.99 (0.9-1.1)	0.867243	-	-	-	-	-	-	-	-	-	-	-	-	-	-	-
	isoleucine	1125	HMDB00172	6306	C00407	CC[C@H](C)[C@H](N)C(O)=O	Amino Acids	Leucine, Isoleucine and Valine Metabolism	Sensitivity	Inverse variance weighted (multiplicative random effects)	2	0.99 (0.88-1.12)	0.887694	-	-	-	-	-	-	-	-	-	-	-	-	-	-	-
	isoursodeoxycholate	57577	HMDB00686	127601	C17662	[H][C@@]12CC[C@H]([C@H](C)CCC(O)=O)[C@@]1(C)[C@@H](O)C[C@@]1([H])[C@@]2([H])[C@@H](O)C[C@]2([H])C[C@@H](O)CC[C@]12C	Lipids	Secondary Bile Acid Metabolism	Primary	Inverse variance weighted (random effects)/ Wald ratio	-	-	-	-	-	-	-	-	1	0.85 (0.54-1.33)	0.472521	0.987241	-	-	-	-	-	-
	isovalerate	44656	HMDB00718	10430	C08262	CC(C)CC(O)=O	Amino Acids	Leucine, Isoleucine and Valine Metabolism	Primary	Inverse variance weighted (random effects)/ Wald ratio	-	-	-	-	-	-	-	-	1	1.3 (0.85-2)	0.225094	0.755663	-	-	-	-	-	-
	isovalerylcarnitine (C5)	34407	HMDB00688	6426851	-	CC(C)CC(=O)OC(CC([O-])=O)C[N+](C)(C)C	Amino Acids	Leucine, Isoleucine and Valine Metabolism	Primary	Inverse variance weighted (random effects)/ Wald ratio	-	-	-	-	1	1.09 (1.03-1.16)	0.00389341	0.0687837	2	1.09 (0.8-1.48)	0.587731	0.994872	2	1.09 (1.03-1.16)	0.00331359	0.0289387	0	0.987793
	isovalerylcarnitine (C5)	34407	HMDB00688	6426851	-	CC(C)CC(=O)OC(CC([O-])=O)C[N+](C)(C)C	Amino Acids	Leucine, Isoleucine and Valine Metabolism	Sensitivity	Inverse variance weighted (fixed effects)	-	-	-	-	-	-	-	-	2	1.09 (0.89-1.33)	0.418582	-	-	-	-	-	-	-
	isovalerylcarnitine (C5)	34407	HMDB00688	6426851	-	CC(C)CC(=O)OC(CC([O-])=O)C[N+](C)(C)C	Amino Acids	Leucine, Isoleucine and Valine Metabolism	Sensitivity	Inverse variance weighted (multiplicative random effects)	-	-	-	-	-	-	-	-	2	1.09 (0.8-1.48)	0.587731	-	-	-	-	-	-	-
	isovalerylglycine	35107	HMDB00678	546304	-	CC(C)CC(=O)NCC(O)=O	Amino Acids	Leucine, Isoleucine and Valine Metabolism	Primary	Inverse variance weighted (random effects)/ Wald ratio	-	-	-	-	-	-	-	-	3	0.99 (0.74-1.33)	0.937569	0.999021	-	-	-	-	-	-
	isovalerylglycine	35107	HMDB00678	546304	-	CC(C)CC(=O)NCC(O)=O	Amino Acids	Leucine, Isoleucine and Valine Metabolism	Sensitivity	Inverse variance weighted (fixed effects)	-	-	-	-	-	-	-	-	3	0.99 (0.82-1.2)	0.904133	-	-	-	-	-	-	-
	isovalerylglycine	35107	HMDB00678	546304	-	CC(C)CC(=O)NCC(O)=O	Amino Acids	Leucine, Isoleucine and Valine Metabolism	Sensitivity	Inverse variance weighted (multiplicative random effects)	-	-	-	-	-	-	-	-	3	0.99 (0.74-1.33)	0.937569	-	-	-	-	-	-	-
	isovalerylglycine	35107	HMDB00678	546304	-	CC(C)CC(=O)NCC(O)=O	Amino Acids	Leucine, Isoleucine and Valine Metabolism	Sensitivity	MR Egger	-	-	-	-	-	-	-	-	3	0.62 (0.15-2.61)	0.633946	-	-	-	-	-	-	-
	isovalerylglycine	35107	HMDB00678	546304	-	CC(C)CC(=O)NCC(O)=O	Amino Acids	Leucine, Isoleucine and Valine Metabolism	Sensitivity	Weighted median	-	-	-	-	-	-	-	-	3	0.9 (0.72-1.13)	0.383151	-	-	-	-	-	-	-
	isovalerylglycine	35107	HMDB00678	546304	-	CC(C)CC(=O)NCC(O)=O	Amino Acids	Leucine, Isoleucine and Valine Metabolism	Sensitivity	Weighted mode	-	-	-	-	-	-	-	-	3	0.89 (0.7-1.13)	0.441757	-	-	-	-	-	-	-
	kynurenate	1417	HMDB00715	3845	C01717	OC(=O)C1=CC(=O)C2=CC=CC=C2N1	Amino Acids	Tryptophan Metabolism	Primary	Inverse variance weighted (random effects)/ Wald ratio	-	-	-	-	-	-	-	-	3	0.96 (0.81-1.14)	0.654711	0.994872	-	-	-	-	-	-
	kynurenate	1417	HMDB00715	3845	C01717	OC(=O)C1=CC(=O)C2=CC=CC=C2N1	Amino Acids	Tryptophan Metabolism	Sensitivity	Inverse variance weighted (fixed effects)	-	-	-	-	-	-	-	-	3	0.96 (0.81-1.14)	0.654711	-	-	-	-	-	-	-
	kynurenate	1417	HMDB00715	3845	C01717	OC(=O)C1=CC(=O)C2=CC=CC=C2N1	Amino Acids	Tryptophan Metabolism	Sensitivity	Inverse variance weighted (multiplicative random effects)	-	-	-	-	-	-	-	-	3	0.96 (0.89-1.04)	0.329705	-	-	-	-	-	-	-
	kynurenate	1417	HMDB00715	3845	C01717	OC(=O)C1=CC(=O)C2=CC=CC=C2N1	Amino Acids	Tryptophan Metabolism	Sensitivity	MR Egger	-	-	-	-	-	-	-	-	3	1.36 (0.43-4.34)	0.695732	-	-	-	-	-	-	-
	kynurenate	1417	HMDB00715	3845	C01717	OC(=O)C1=CC(=O)C2=CC=CC=C2N1	Amino Acids	Tryptophan Metabolism	Sensitivity	Weighted median	-	-	-	-	-	-	-	-	3	0.96 (0.81-1.15)	0.662093	-	-	-	-	-	-	-
	kynurenate	1417	HMDB00715	3845	C01717	OC(=O)C1=CC(=O)C2=CC=CC=C2N1	Amino Acids	Tryptophan Metabolism	Sensitivity	Weighted mode	-	-	-	-	-	-	-	-	3	0.99 (0.81-1.22)	0.966182	-	-	-	-	-	-	-
	kynurenine	15140	HMDB00684	161166	C00328	N[C@@H](CC(=O)C1=CC=CC=C1N)C(O)=O	Amino Acids	Tryptophan Metabolism	Primary	Inverse variance weighted (random effects)/ Wald ratio	-	-	-	-	-	-	-	-	3	1.12 (0.82-1.54)	0.47224	0.987241	-	-	-	-	-	-
	kynurenine	15140	HMDB00684	161166	C00328	N[C@@H](CC(=O)C1=CC=CC=C1N)C(O)=O	Amino Acids	Tryptophan Metabolism	Sensitivity	Inverse variance weighted (fixed effects)	-	-	-	-	-	-	-	-	3	1.12 (0.93-1.36)	0.240376	-	-	-	-	-	-	-
	kynurenine	15140	HMDB00684	161166	C00328	N[C@@H](CC(=O)C1=CC=CC=C1N)C(O)=O	Amino Acids	Tryptophan Metabolism	Sensitivity	Inverse variance weighted (multiplicative random effects)	-	-	-	-	-	-	-	-	3	1.12 (0.82-1.54)	0.47224	-	-	-	-	-	-	-
	kynurenine	15140	HMDB00684	161166	C00328	N[C@@H](CC(=O)C1=CC=CC=C1N)C(O)=O	Amino Acids	Tryptophan Metabolism	Sensitivity	MR Egger	-	-	-	-	-	-	-	-	3	0.29 (0.09-0.95)	0.28987	-	-	-	-	-	-	-
	kynurenine	15140	HMDB00684	161166	C00328	N[C@@H](CC(=O)C1=CC=CC=C1N)C(O)=O	Amino Acids	Tryptophan Metabolism	Sensitivity	Weighted median	-	-	-	-	-	-	-	-	3	1.1 (0.87-1.39)	0.432204	-	-	-	-	-	-	-
	kynurenine	15140	HMDB00684	161166	C00328	N[C@@H](CC(=O)C1=CC=CC=C1N)C(O)=O	Amino Acids	Tryptophan Metabolism	Sensitivity	Weighted mode	-	-	-	-	-	-	-	-	3	0.99 (0.77-1.27)	0.938765	-	-	-	-	-	-	-
	lactate	527	HMDB00190	612	C00186	C[C@H](O)C(O)=O	Carbohydrates	Glycolysis, Gluconeogenesis, and Pyruvate Metabolism	Primary	Inverse variance weighted (random effects)/ Wald ratio	1	0.9 (0.77-1.05)	0.168961	0.863252	-	-	-	-	-	-	-	-	-	-	-	-	-	-
	lactosyl-N-behenoyl-sphingosine (d18:1/22:0)*	57422	-	-	-	-	Lipids	Sphingolipid Metabolism	Primary	Inverse variance weighted (random effects)/ Wald ratio	-	-	-	-	-	-	-	-	3	1.03 (0.89-1.18)	0.715268	0.994872	-	-	-	-	-	-
	lactosyl-N-behenoyl-sphingosine (d18:1/22:0)*	57422	-	-	-	-	Lipids	Sphingolipid Metabolism	Sensitivity	Inverse variance weighted (fixed effects)	-	-	-	-	-	-	-	-	3	1.03 (0.89-1.18)	0.715268	-	-	-	-	-	-	-
	lactosyl-N-behenoyl-sphingosine (d18:1/22:0)*	57422	-	-	-	-	Lipids	Sphingolipid Metabolism	Sensitivity	Inverse variance weighted (multiplicative random effects)	-	-	-	-	-	-	-	-	3	1.03 (0.96-1.1)	0.458895	-	-	-	-	-	-	-
	lactosyl-N-behenoyl-sphingosine (d18:1/22:0)*	57422	-	-	-	-	Lipids	Sphingolipid Metabolism	Sensitivity	MR Egger	-	-	-	-	-	-	-	-	3	0.96 (0.72-1.27)	0.813339	-	-	-	-	-	-	-
	lactosyl-N-behenoyl-sphingosine (d18:1/22:0)*	57422	-	-	-	-	Lipids	Sphingolipid Metabolism	Sensitivity	Weighted median	-	-	-	-	-	-	-	-	3	1.01 (0.87-1.17)	0.892596	-	-	-	-	-	-	-
	lactosyl-N-behenoyl-sphingosine (d18:1/22:0)*	57422	-	-	-	-	Lipids	Sphingolipid Metabolism	Sensitivity	Weighted mode	-	-	-	-	-	-	-	-	3	1 (0.85-1.18)	0.982423	-	-	-	-	-	-	-
	lactosyl-N-nervonoyl-sphingosine (d18:1/24:1)*	57370	-	-	-	-	Lipids	Ceramides	Primary	Inverse variance weighted (random effects)/ Wald ratio	-	-	-	-	-	-	-	-	3	0.92 (0.8-1.05)	0.198615	0.710262	-	-	-	-	-	-
	lactosyl-N-nervonoyl-sphingosine (d18:1/24:1)*	57370	-	-	-	-	Lipids	Ceramides	Sensitivity	Inverse variance weighted (fixed effects)	-	-	-	-	-	-	-	-	3	0.92 (0.81-1.04)	0.18473	-	-	-	-	-	-	-
	lactosyl-N-nervonoyl-sphingosine (d18:1/24:1)*	57370	-	-	-	-	Lipids	Ceramides	Sensitivity	Inverse variance weighted (multiplicative random effects)	-	-	-	-	-	-	-	-	3	0.92 (0.8-1.05)	0.198615	-	-	-	-	-	-	-
	lactosyl-N-nervonoyl-sphingosine (d18:1/24:1)*	57370	-	-	-	-	Lipids	Ceramides	Sensitivity	MR Egger	-	-	-	-	-	-	-	-	3	0.87 (0.22-3.51)	0.88036	-	-	-	-	-	-	-
	lactosyl-N-nervonoyl-sphingosine (d18:1/24:1)*	57370	-	-	-	-	Lipids	Ceramides	Sensitivity	Weighted median	-	-	-	-	-	-	-	-	3	0.92 (0.79-1.07)	0.285938	-	-	-	-	-	-	-
	lactosyl-N-nervonoyl-sphingosine (d18:1/24:1)*	57370	-	-	-	-	Lipids	Ceramides	Sensitivity	Weighted mode	-	-	-	-	-	-	-	-	3	0.95 (0.79-1.14)	0.619716	-	-	-	-	-	-	-
	lactosyl-N-palmitoyl-sphingosine (d18:1/16:0)	53010	-	-	-	-	Lipids	Ceramides	Primary	Inverse variance weighted (random effects)/ Wald ratio	-	-	-	-	-	-	-	-	2	0.75 (0.55-1.02)	0.067569	0.413673	-	-	-	-	-	-
	lactosyl-N-palmitoyl-sphingosine (d18:1/16:0)	53010	-	-	-	-	Lipids	Ceramides	Sensitivity	Inverse variance weighted (fixed effects)	-	-	-	-	-	-	-	-	2	0.75 (0.55-1.02)	0.067569	-	-	-	-	-	-	-
	lactosyl-N-palmitoyl-sphingosine (d18:1/16:0)	53010	-	-	-	-	Lipids	Ceramides	Sensitivity	Inverse variance weighted (multiplicative random effects)	-	-	-	-	-	-	-	-	2	0.75 (0.59-0.95)	0.0174303	-	-	-	-	-	-	-
	lactosyl-N-palmitoyl-sphingosine (d18:1/16:0)	53010	-	-	-	-	Lipids	Ceramides	Sensitivity	MR Egger	-	-	-	-	-	-	-	-	3	0.67 (0.25-1.82)	0.577732	-	-	-	-	-	-	-
	lactosyl-N-palmitoyl-sphingosine (d18:1/16:0)	53010	-	-	-	-	Lipids	Ceramides	Sensitivity	Weighted median	-	-	-	-	-	-	-	-	3	0.86 (0.63-1.18)	0.35844	-	-	-	-	-	-	-
	lactosyl-N-palmitoyl-sphingosine (d18:1/16:0)	53010	-	-	-	-	Lipids	Ceramides	Sensitivity	Weighted mode	-	-	-	-	-	-	-	-	3	0.88 (0.61-1.28)	0.578794	-	-	-	-	-	-	-
	laurylcarnitine (C12)	34534	HMDB02250	10427569	-	CCCCCCCCCCCC(=O)O[C@H](CC(O)=O)C[N+](C)(C)C	Lipids	Fatty Acid Metabolism (Acyl Carnitine)	Primary	Inverse variance weighted (random effects)/ Wald ratio	1	0.94 (0.81-1.1)	0.459075	0.863252	1	1.05 (0.97-1.13)	0.224638	0.517645	3	1.14 (0.88-1.47)	0.320886	0.89235	3	1.03 (0.97-1.1)	0.321862	0.680064	1.30765	0.363037
	laurylcarnitine (C12)	34534	HMDB02250	10427569	-	CCCCCCCCCCCC(=O)O[C@H](CC(O)=O)C[N+](C)(C)C	Lipids	Fatty Acid Metabolism (Acyl Carnitine)	Sensitivity	Inverse variance weighted (fixed effects)	-	-	-	-	-	-	-	-	3	1.14 (0.88-1.47)	0.320886	-	-	-	-	-	-	-
	laurylcarnitine (C12)	34534	HMDB02250	10427569	-	CCCCCCCCCCCC(=O)O[C@H](CC(O)=O)C[N+](C)(C)C	Lipids	Fatty Acid Metabolism (Acyl Carnitine)	Sensitivity	Inverse variance weighted (multiplicative random effects)	-	-	-	-	-	-	-	-	3	1.14 (1.04-1.25)	0.00731851	-	-	-	-	-	-	-
	laurylcarnitine (C12)	34534	HMDB02250	10427569	-	CCCCCCCCCCCC(=O)O[C@H](CC(O)=O)C[N+](C)(C)C	Lipids	Fatty Acid Metabolism (Acyl Carnitine)	Sensitivity	MR Egger	-	-	-	-	-	-	-	-	3	1.42 (0.54-3.75)	0.605478	-	-	-	-	-	-	-
	laurylcarnitine (C12)	34534	HMDB02250	10427569	-	CCCCCCCCCCCC(=O)O[C@H](CC(O)=O)C[N+](C)(C)C	Lipids	Fatty Acid Metabolism (Acyl Carnitine)	Sensitivity	Weighted median	-	-	-	-	-	-	-	-	3	1.19 (0.87-1.63)	0.272762	-	-	-	-	-	-	-
	laurylcarnitine (C12)	34534	HMDB02250	10427569	-	CCCCCCCCCCCC(=O)O[C@H](CC(O)=O)C[N+](C)(C)C	Lipids	Fatty Acid Metabolism (Acyl Carnitine)	Sensitivity	Weighted mode	-	-	-	-	-	-	-	-	3	1.2 (0.84-1.71)	0.419114	-	-	-	-	-	-	-
	leucine	60	HMDB00687	6106	C00123	CC(C)C[C@H](N)C(O)=O	Amino Acids	Leucine, Isoleucine and Valine Metabolism	Primary	Inverse variance weighted (random effects)/ Wald ratio	1	1.05 (0.91-1.22)	0.466988	0.863252	-	-	-	-	-	-	-	-	-	-	-	-	-	-
	leucylalanine	40010	HMDB28922	259321	-	CC(C)C[C@H](N)C(=O)N[C@@H](C)C(O)=O	Peptides	Dipeptide	Primary	Inverse variance weighted (random effects)/ Wald ratio	-	-	-	-	-	-	-	-	6	0.98 (0.86-1.11)	0.72413	0.994872	-	-	-	-	-	-
	leucylalanine	40010	HMDB28922	259321	-	CC(C)C[C@H](N)C(=O)N[C@@H](C)C(O)=O	Peptides	Dipeptide	Sensitivity	Inverse variance weighted (fixed effects)	-	-	-	-	-	-	-	-	6	0.98 (0.86-1.11)	0.72413	-	-	-	-	-	-	-
	leucylalanine	40010	HMDB28922	259321	-	CC(C)C[C@H](N)C(=O)N[C@@H](C)C(O)=O	Peptides	Dipeptide	Sensitivity	Inverse variance weighted (multiplicative random effects)	-	-	-	-	-	-	-	-	6	0.98 (0.87-1.1)	0.719658	-	-	-	-	-	-	-
	leucylalanine	40010	HMDB28922	259321	-	CC(C)C[C@H](N)C(=O)N[C@@H](C)C(O)=O	Peptides	Dipeptide	Sensitivity	MR Egger	-	-	-	-	-	-	-	-	6	0.76 (0.5-1.14)	0.258274	-	-	-	-	-	-	-
	leucylalanine	40010	HMDB28922	259321	-	CC(C)C[C@H](N)C(=O)N[C@@H](C)C(O)=O	Peptides	Dipeptide	Sensitivity	Weighted median	-	-	-	-	-	-	-	-	6	0.94 (0.81-1.09)	0.398057	-	-	-	-	-	-	-
	leucylalanine	40010	HMDB28922	259321	-	CC(C)C[C@H](N)C(=O)N[C@@H](C)C(O)=O	Peptides	Dipeptide	Sensitivity	Weighted mode	-	-	-	-	-	-	-	-	6	0.91 (0.77-1.08)	0.340099	-	-	-	-	-	-	-
	leucylglycine	40045	HMDB28929	79070	C02155	CC(C)C[C@H](NC(=O)CN)C(O)=O	Peptides	Dipeptide	Primary	Inverse variance weighted (random effects)/ Wald ratio	-	-	-	-	-	-	-	-	5	1 (0.86-1.16)	0.959463	0.999026	-	-	-	-	-	-
	leucylglycine	40045	HMDB28929	79070	C02155	CC(C)C[C@H](NC(=O)CN)C(O)=O	Peptides	Dipeptide	Sensitivity	Inverse variance weighted (fixed effects)	-	-	-	-	-	-	-	-	5	1 (0.86-1.16)	0.959463	-	-	-	-	-	-	-
	leucylglycine	40045	HMDB28929	79070	C02155	CC(C)C[C@H](NC(=O)CN)C(O)=O	Peptides	Dipeptide	Sensitivity	Inverse variance weighted (multiplicative random effects)	-	-	-	-	-	-	-	-	5	1 (0.93-1.07)	0.91171	-	-	-	-	-	-	-
	leucylglycine	40045	HMDB28929	79070	C02155	CC(C)C[C@H](NC(=O)CN)C(O)=O	Peptides	Dipeptide	Sensitivity	MR Egger	-	-	-	-	-	-	-	-	5	0.91 (0.49-1.71)	0.791522	-	-	-	-	-	-	-
	leucylglycine	40045	HMDB28929	79070	C02155	CC(C)C[C@H](NC(=O)CN)C(O)=O	Peptides	Dipeptide	Sensitivity	Weighted median	-	-	-	-	-	-	-	-	5	0.99 (0.84-1.17)	0.897822	-	-	-	-	-	-	-
	leucylglycine	40045	HMDB28929	79070	C02155	CC(C)C[C@H](NC(=O)CN)C(O)=O	Peptides	Dipeptide	Sensitivity	Weighted mode	-	-	-	-	-	-	-	-	5	0.96 (0.78-1.17)	0.690204	-	-	-	-	-	-	-
	leucylleucine	36756	HMDB0028933	94244	C11332	CC(C)C[C@H](N)C(=O)N[C@@H](CC(C)C)C(O)=O	Peptides	Dipeptide	Primary	Inverse variance weighted (random effects)/ Wald ratio	-	-	-	-	1	0.99 (0.92-1.05)	0.660752	0.875496	-	-	-	-	-	-	-	-	-	-
	lignoceroyl sphingomyelin (d18:1/24:0)	57330	-	-	-	-	Lipids	Sphingolipid Metabolism	Primary	Inverse variance weighted (random effects)/ Wald ratio	-	-	-	-	-	-	-	-	1	0.79 (0.34-1.82)	0.576109	0.994872	-	-	-	-	-	-
	linoleate (18:2n6)	1105	HMDB00673	5280450	C01595	CCCCC\C=C/C\C=C/CCCCCCCC(O)=O	Lipids	Long Chain Fatty Acid	Primary	Inverse variance weighted (random effects)/ Wald ratio	1	0.92 (0.8-1.07)	0.282765	0.863252	-	-	-	-	-	-	-	-	-	-	-	-	-	-
	linolenate [alpha or gamma; (18:3n3 or 6)]	34035	HMDB03073	5280934	C06426	CCCCC\C=C/C\C=C/C\C=C/CCCCC(O)=O	Lipids	Polyunsaturated Fatty Acid (n3 and n6)	Primary	Inverse variance weighted (random effects)/ Wald ratio	-	-	-	-	-	-	-	-	1	0.77 (0.48-1.24)	0.280761	0.860923	-	-	-	-	-	-
	linoleoyl ethanolamide	52608	HMDB12252	5283446	-	CCCCC\C=C/C\C=C/CCCCCCCC(=O)NCCO	Lipids	Endocannabinoid	Primary	Inverse variance weighted (random effects)/ Wald ratio	-	-	-	-	-	-	-	-	2	1 (0.87-1.16)	0.95075	0.999021	-	-	-	-	-	-
	linoleoyl ethanolamide	52608	HMDB12252	5283446	-	CCCCC\C=C/C\C=C/CCCCCCCC(=O)NCCO	Lipids	Endocannabinoid	Sensitivity	Inverse variance weighted (fixed effects)	-	-	-	-	-	-	-	-	2	1 (0.87-1.16)	0.95075	-	-	-	-	-	-	-
	linoleoyl ethanolamide	52608	HMDB12252	5283446	-	CCCCC\C=C/C\C=C/CCCCCCCC(=O)NCCO	Lipids	Endocannabinoid	Sensitivity	Inverse variance weighted (multiplicative random effects)	-	-	-	-	-	-	-	-	2	1 (0.95-1.06)	0.880911	-	-	-	-	-	-	-
	linoleoyl-arachidonoyl-glycerol (18:2/20:4) [1]*	54955	HMDB07257	9543796	C00165	[H][C@](CO)(COC(=O)CCCCCCC\C=C/C\C=C/CCCCC)OC(=O)CCC\C=C/C\C=C/C\C=C/C\C=C/CCCCC	Lipids	Diacylglycerol	Primary	Inverse variance weighted (random effects)/ Wald ratio	-	-	-	-	-	-	-	-	12	1.15 (1.05-1.26)	0.00309283	0.0493855	-	-	-	-	-	-
	linoleoyl-arachidonoyl-glycerol (18:2/20:4) [1]*	54955	HMDB07257	9543796	C00165	[H][C@](CO)(COC(=O)CCCCCCC\C=C/C\C=C/CCCCC)OC(=O)CCC\C=C/C\C=C/C\C=C/C\C=C/CCCCC	Lipids	Diacylglycerol	Sensitivity	Inverse variance weighted (fixed effects)	-	-	-	-	-	-	-	-	12	1.15 (1.05-1.26)	0.00309283	-	-	-	-	-	-	-
	linoleoyl-arachidonoyl-glycerol (18:2/20:4) [1]*	54955	HMDB07257	9543796	C00165	[H][C@](CO)(COC(=O)CCCCCCC\C=C/C\C=C/CCCCC)OC(=O)CCC\C=C/C\C=C/C\C=C/C\C=C/CCCCC	Lipids	Diacylglycerol	Sensitivity	Inverse variance weighted (multiplicative random effects)	-	-	-	-	-	-	-	-	12	1.15 (1.05-1.25)	0.00151161	-	-	-	-	-	-	-
	linoleoyl-arachidonoyl-glycerol (18:2/20:4) [1]*	54955	HMDB07257	9543796	C00165	[H][C@](CO)(COC(=O)CCCCCCC\C=C/C\C=C/CCCCC)OC(=O)CCC\C=C/C\C=C/C\C=C/C\C=C/CCCCC	Lipids	Diacylglycerol	Sensitivity	MR Egger	-	-	-	-	-	-	-	-	12	1.05 (0.73-1.5)	0.807548	-	-	-	-	-	-	-
	linoleoyl-arachidonoyl-glycerol (18:2/20:4) [1]*	54955	HMDB07257	9543796	C00165	[H][C@](CO)(COC(=O)CCCCCCC\C=C/C\C=C/CCCCC)OC(=O)CCC\C=C/C\C=C/C\C=C/C\C=C/CCCCC	Lipids	Diacylglycerol	Sensitivity	Weighted median	-	-	-	-	-	-	-	-	12	1.15 (1.02-1.31)	0.0230167	-	-	-	-	-	-	-
	linoleoyl-arachidonoyl-glycerol (18:2/20:4) [1]*	54955	HMDB07257	9543796	C00165	[H][C@](CO)(COC(=O)CCCCCCC\C=C/C\C=C/CCCCC)OC(=O)CCC\C=C/C\C=C/C\C=C/C\C=C/CCCCC	Lipids	Diacylglycerol	Sensitivity	Weighted mode	-	-	-	-	-	-	-	-	12	1.18 (1-1.39)	0.0695515	-	-	-	-	-	-	-
	linoleoyl-arachidonoyl-glycerol (18:2/20:4) [2]*	54956	HMDB07257	9543796	C00165	[H][C@](CO)(COC(=O)CCCCCCC\C=C/C\C=C/CCCCC)OC(=O)CCC\C=C/C\C=C/C\C=C/C\C=C/CCCCC	Lipids	Diacylglycerol	Primary	Inverse variance weighted (random effects)/ Wald ratio	-	-	-	-	-	-	-	-	20	1.2 (1.11-1.29)	3.73467e-06	0.000153863	-	-	-	-	-	-
	linoleoyl-arachidonoyl-glycerol (18:2/20:4) [2]*	54956	HMDB07257	9543796	C00165	[H][C@](CO)(COC(=O)CCCCCCC\C=C/C\C=C/CCCCC)OC(=O)CCC\C=C/C\C=C/C\C=C/C\C=C/CCCCC	Lipids	Diacylglycerol	Sensitivity	Inverse variance weighted (fixed effects)	-	-	-	-	-	-	-	-	20	1.2 (1.11-1.29)	3.73467e-06	-	-	-	-	-	-	-
	linoleoyl-arachidonoyl-glycerol (18:2/20:4) [2]*	54956	HMDB07257	9543796	C00165	[H][C@](CO)(COC(=O)CCCCCCC\C=C/C\C=C/CCCCC)OC(=O)CCC\C=C/C\C=C/C\C=C/C\C=C/CCCCC	Lipids	Diacylglycerol	Sensitivity	Inverse variance weighted (multiplicative random effects)	-	-	-	-	-	-	-	-	20	1.2 (1.13-1.27)	6.64654e-09	-	-	-	-	-	-	-
	linoleoyl-arachidonoyl-glycerol (18:2/20:4) [2]*	54956	HMDB07257	9543796	C00165	[H][C@](CO)(COC(=O)CCCCCCC\C=C/C\C=C/CCCCC)OC(=O)CCC\C=C/C\C=C/C\C=C/C\C=C/CCCCC	Lipids	Diacylglycerol	Sensitivity	MR Egger	-	-	-	-	-	-	-	-	20	1.17 (0.82-1.67)	0.397441	-	-	-	-	-	-	-
	linoleoyl-arachidonoyl-glycerol (18:2/20:4) [2]*	54956	HMDB07257	9543796	C00165	[H][C@](CO)(COC(=O)CCCCCCC\C=C/C\C=C/CCCCC)OC(=O)CCC\C=C/C\C=C/C\C=C/C\C=C/CCCCC	Lipids	Diacylglycerol	Sensitivity	Weighted median	-	-	-	-	-	-	-	-	20	1.17 (1.05-1.3)	0.0045465	-	-	-	-	-	-	-
	linoleoyl-arachidonoyl-glycerol (18:2/20:4) [2]*	54956	HMDB07257	9543796	C00165	[H][C@](CO)(COC(=O)CCCCCCC\C=C/C\C=C/CCCCC)OC(=O)CCC\C=C/C\C=C/C\C=C/C\C=C/CCCCC	Lipids	Diacylglycerol	Sensitivity	Weighted mode	-	-	-	-	-	-	-	-	20	1.18 (1.01-1.37)	0.0482679	-	-	-	-	-	-	-
	linoleoyl-linoleoyl-glycerol (18:2/18:2) [1]*	54968	HMDB07248	9543729	C00165	[H][C@](CO)(COC(=O)CCCCCCC\C=C/C\C=C/CCCCC)OC(=O)CCCCCCC\C=C/C\C=C/CCCCC	Lipids	Diacylglycerol	Primary	Inverse variance weighted (random effects)/ Wald ratio	-	-	-	-	-	-	-	-	2	1.01 (0.81-1.25)	0.939782	0.999021	-	-	-	-	-	-
	linoleoyl-linoleoyl-glycerol (18:2/18:2) [1]*	54968	HMDB07248	9543729	C00165	[H][C@](CO)(COC(=O)CCCCCCC\C=C/C\C=C/CCCCC)OC(=O)CCCCCCC\C=C/C\C=C/CCCCC	Lipids	Diacylglycerol	Sensitivity	Inverse variance weighted (fixed effects)	-	-	-	-	-	-	-	-	2	1.01 (0.81-1.25)	0.939782	-	-	-	-	-	-	-
	linoleoyl-linoleoyl-glycerol (18:2/18:2) [1]*	54968	HMDB07248	9543729	C00165	[H][C@](CO)(COC(=O)CCCCCCC\C=C/C\C=C/CCCCC)OC(=O)CCCCCCC\C=C/C\C=C/CCCCC	Lipids	Diacylglycerol	Sensitivity	Inverse variance weighted (multiplicative random effects)	-	-	-	-	-	-	-	-	2	1.01 (0.88-1.16)	0.904998	-	-	-	-	-	-	-
	linoleoylcarnitine (C18:2)*	46223	HMDB06469	6450015	-	CCCCC\C=C/C\C=C/CCCCCCCC(=O)O[C@H](CC(O)=O)C[N+](C)(C)C	Lipids	Fatty Acid Metabolism (Acyl Carnitine)	Primary	Inverse variance weighted (random effects)/ Wald ratio	-	-	-	-	-	-	-	-	2	0.96 (0.79-1.17)	0.685711	0.994872	-	-	-	-	-	-
	linoleoylcarnitine (C18:2)*	46223	HMDB06469	6450015	-	CCCCC\C=C/C\C=C/CCCCCCCC(=O)O[C@H](CC(O)=O)C[N+](C)(C)C	Lipids	Fatty Acid Metabolism (Acyl Carnitine)	Sensitivity	Inverse variance weighted (fixed effects)	-	-	-	-	-	-	-	-	2	0.96 (0.79-1.17)	0.685711	-	-	-	-	-	-	-
	linoleoylcarnitine (C18:2)*	46223	HMDB06469	6450015	-	CCCCC\C=C/C\C=C/CCCCCCCC(=O)O[C@H](CC(O)=O)C[N+](C)(C)C	Lipids	Fatty Acid Metabolism (Acyl Carnitine)	Sensitivity	Inverse variance weighted (multiplicative random effects)	-	-	-	-	-	-	-	-	2	0.96 (0.88-1.05)	0.346856	-	-	-	-	-	-	-
	linoleoylcholine*	57463	-	-	-	-	Lipids	Fatty Acid Metabolism (Acyl Choline)	Primary	Inverse variance weighted (random effects)/ Wald ratio	-	-	-	-	-	-	-	-	1	1.23 (0.59-2.57)	0.574062	0.994872	-	-	-	-	-	-
	lysine	1301	HMDB00182	5962	C00047	NCCCC[C@H](N)C(O)=O	Amino Acids	Lysine Metabolism	Primary	Inverse variance weighted (random effects)/ Wald ratio	-	-	-	-	-	-	-	-	1	1.24 (0.96-1.62)	0.101039	0.510352	-	-	-	-	-	-
	malate	1303	HMDB00156	525	C00149	O[C@@H](CC(O)=O)C(O)=O	Energy	TCA Cycle	Primary	Inverse variance weighted (random effects)/ Wald ratio	1	1.12 (0.95-1.32)	0.178032	0.863252	1	1 (0.95-1.05)	0.974675	0.974675	6	0.99 (0.74-1.3)	0.916209	0.998951	3	1.01 (0.96-1.06)	0.722035	0.900824	0	0.427536
	malate	1303	HMDB00156	525	C00149	O[C@@H](CC(O)=O)C(O)=O	Energy	TCA Cycle	Sensitivity	Inverse variance weighted (fixed effects)	-	-	-	-	-	-	-	-	6	0.99 (0.82-1.18)	0.872232	-	-	-	-	-	-	-
	malate	1303	HMDB00156	525	C00149	O[C@@H](CC(O)=O)C(O)=O	Energy	TCA Cycle	Sensitivity	Inverse variance weighted (multiplicative random effects)	-	-	-	-	-	-	-	-	6	0.99 (0.74-1.3)	0.916209	-	-	-	-	-	-	-
	malate	1303	HMDB00156	525	C00149	O[C@@H](CC(O)=O)C(O)=O	Energy	TCA Cycle	Sensitivity	MR Egger	-	-	-	-	-	-	-	-	6	0.41 (0.04-4.43)	0.503867	-	-	-	-	-	-	-
	malate	1303	HMDB00156	525	C00149	O[C@@H](CC(O)=O)C(O)=O	Energy	TCA Cycle	Sensitivity	Weighted median	-	-	-	-	-	-	-	-	6	0.95 (0.72-1.25)	0.710991	-	-	-	-	-	-	-
	malate	1303	HMDB00156	525	C00149	O[C@@H](CC(O)=O)C(O)=O	Energy	TCA Cycle	Sensitivity	Weighted mode	-	-	-	-	-	-	-	-	6	1.26 (0.7-2.26)	0.46958	-	-	-	-	-	-	-
	maltose	15586	HMDB00163	10991489	C00208	OC[C@H]1O[C@H](O[C@H]2[C@H](O)[C@H](O)[C@@H](O)O[C@@H]2CO)[C@H](O)[C@@H](O)[C@@H]1O	Carbohydrates	Glycogen Metabolism	Primary	Inverse variance weighted (random effects)/ Wald ratio	-	-	-	-	-	-	-	-	1	0.87 (0.53-1.42)	0.57387	0.994872	-	-	-	-	-	-
	mannitol/sorbitol	46142	HMDB00247	5780	C00794	OC[C@H](O)[C@@H](O)[C@H](O)[C@H](O)CO	Carbohydrates	Fructose, Mannose, Galactose, Starch, and Sucrose Metabolism	Primary	Inverse variance weighted (random effects)/ Wald ratio	-	-	-	-	-	-	-	-	1	0.96 (0.5-1.84)	0.898232	0.997882	-	-	-	-	-	-
	mannose	48153	HMDB00169	18950	C00159	OC[C@H]1O[C@H](O)[C@@H](O)[C@@H](O)[C@@H]1O	Carbohydrates	Fructose, Mannose, Galactose, Starch, and Sucrose Metabolism	Primary	Inverse variance weighted (random effects)/ Wald ratio	1	1.01 (0.9-1.13)	0.907347	0.966361	4	0.96 (0.94-0.98)	3.41047e-05	0.0018073	9	1.19 (1.08-1.3)	0.000280533	0.00603756	3	0.97 (0.95-0.99)	0.000967383	0.0105606	89.7403	5.84789e-05
	mannose	48153	HMDB00169	18950	C00159	OC[C@H]1O[C@H](O)[C@@H](O)[C@@H](O)[C@@H]1O	Carbohydrates	Fructose, Mannose, Galactose, Starch, and Sucrose Metabolism	Sensitivity	Inverse variance weighted (fixed effects)	-	-	-	-	4	0.96 (0.95-0.98)	9.87444e-06	-	9	1.19 (1.08-1.3)	0.000280533	-	-	-	-	-	-	-
	mannose	48153	HMDB00169	18950	C00159	OC[C@H]1O[C@H](O)[C@@H](O)[C@@H](O)[C@@H]1O	Carbohydrates	Fructose, Mannose, Galactose, Starch, and Sucrose Metabolism	Sensitivity	Inverse variance weighted (multiplicative random effects)	-	-	-	-	4	0.96 (0.94-0.98)	3.41047e-05	-	9	1.19 (1.13-1.25)	1.56e-10	-	-	-	-	-	-	-
	mannose	48153	HMDB00169	18950	C00159	OC[C@H]1O[C@H](O)[C@@H](O)[C@@H](O)[C@@H]1O	Carbohydrates	Fructose, Mannose, Galactose, Starch, and Sucrose Metabolism	Sensitivity	MR Egger	-	-	-	-	4	0.98 (0.91-1.04)	0.541113	-	9	1.21 (0.89-1.65)	0.270835	-	-	-	-	-	-	-
	mannose	48153	HMDB00169	18950	C00159	OC[C@H]1O[C@H](O)[C@@H](O)[C@@H](O)[C@@H]1O	Carbohydrates	Fructose, Mannose, Galactose, Starch, and Sucrose Metabolism	Sensitivity	Weighted median	-	-	-	-	4	0.97 (0.95-0.99)	0.000653889	-	9	1.19 (1.07-1.33)	0.00164112	-	-	-	-	-	-	-
	mannose	48153	HMDB00169	18950	C00159	OC[C@H]1O[C@H](O)[C@@H](O)[C@@H](O)[C@@H]1O	Carbohydrates	Fructose, Mannose, Galactose, Starch, and Sucrose Metabolism	Sensitivity	Weighted mode	-	-	-	-	4	0.97 (0.95-0.99)	0.0470919	-	9	1.19 (1.06-1.34)	0.0196993	-	-	-	-	-	-	-
	methionine sulfone	44878	HMDB0062174	69961	-	CS(=O)(=O)CC[C@H](N)C(O)=O	Amino Acids	Methionine, Cysteine, SAM and Taurine Metabolism	Primary	Inverse variance weighted (random effects)/ Wald ratio	-	-	-	-	-	-	-	-	4	1.03 (0.89-1.19)	0.719495	0.994872	-	-	-	-	-	-
	methionine sulfone	44878	HMDB0062174	69961	-	CS(=O)(=O)CC[C@H](N)C(O)=O	Amino Acids	Methionine, Cysteine, SAM and Taurine Metabolism	Sensitivity	Inverse variance weighted (fixed effects)	-	-	-	-	-	-	-	-	4	1.03 (0.91-1.17)	0.674449	-	-	-	-	-	-	-
	methionine sulfone	44878	HMDB0062174	69961	-	CS(=O)(=O)CC[C@H](N)C(O)=O	Amino Acids	Methionine, Cysteine, SAM and Taurine Metabolism	Sensitivity	Inverse variance weighted (multiplicative random effects)	-	-	-	-	-	-	-	-	4	1.03 (0.89-1.19)	0.719495	-	-	-	-	-	-	-
	methionine sulfone	44878	HMDB0062174	69961	-	CS(=O)(=O)CC[C@H](N)C(O)=O	Amino Acids	Methionine, Cysteine, SAM and Taurine Metabolism	Sensitivity	MR Egger	-	-	-	-	-	-	-	-	4	1.64 (0.94-2.87)	0.222588	-	-	-	-	-	-	-
	methionine sulfone	44878	HMDB0062174	69961	-	CS(=O)(=O)CC[C@H](N)C(O)=O	Amino Acids	Methionine, Cysteine, SAM and Taurine Metabolism	Sensitivity	Weighted median	-	-	-	-	-	-	-	-	4	1.02 (0.87-1.19)	0.837477	-	-	-	-	-	-	-
	methionine sulfone	44878	HMDB0062174	69961	-	CS(=O)(=O)CC[C@H](N)C(O)=O	Amino Acids	Methionine, Cysteine, SAM and Taurine Metabolism	Sensitivity	Weighted mode	-	-	-	-	-	-	-	-	4	1.12 (0.92-1.37)	0.330467	-	-	-	-	-	-	-
	methionine sulfoxide	18374	HMDB02005	158980	C02989	CS(=O)CC[C@H](N)C(O)=O	Amino Acids	Methionine, Cysteine, SAM and Taurine Metabolism	Primary	Inverse variance weighted (random effects)/ Wald ratio	-	-	-	-	-	-	-	-	2	0.94 (0.73-1.22)	0.662859	0.994872	-	-	-	-	-	-
	methionine sulfoxide	18374	HMDB02005	158980	C02989	CS(=O)CC[C@H](N)C(O)=O	Amino Acids	Methionine, Cysteine, SAM and Taurine Metabolism	Sensitivity	Inverse variance weighted (fixed effects)	-	-	-	-	-	-	-	-	2	0.94 (0.73-1.22)	0.662859	-	-	-	-	-	-	-
	methionine sulfoxide	18374	HMDB02005	158980	C02989	CS(=O)CC[C@H](N)C(O)=O	Amino Acids	Methionine, Cysteine, SAM and Taurine Metabolism	Sensitivity	Inverse variance weighted (multiplicative random effects)	-	-	-	-	-	-	-	-	2	0.94 (0.92-0.97)	2.76e-07	-	-	-	-	-	-	-
	methyl glucopyranoside (alpha + beta)	46144	-	-	-	-	Xenobiotics	Food Component/Plant	Primary	Inverse variance weighted (random effects)/ Wald ratio	-	-	-	-	-	-	-	-	2	1.05 (0.86-1.27)	0.643265	0.994872	-	-	-	-	-	-
	methyl glucopyranoside (alpha + beta)	46144	-	-	-	-	Xenobiotics	Food Component/Plant	Sensitivity	Inverse variance weighted (fixed effects)	-	-	-	-	-	-	-	-	2	1.05 (0.86-1.27)	0.643265	-	-	-	-	-	-	-
	methyl glucopyranoside (alpha + beta)	46144	-	-	-	-	Xenobiotics	Food Component/Plant	Sensitivity	Inverse variance weighted (multiplicative random effects)	-	-	-	-	-	-	-	-	2	1.05 (1.03-1.07)	2.53e-06	-	-	-	-	-	-	-
	methyl indole-3-acetate	1584	HMDB29738	74706	-	COC(=O)CC1=CNC2=C1C=CC=C2	Xenobiotics	Food Component/Plant	Primary	Inverse variance weighted (random effects)/ Wald ratio	-	-	-	-	-	-	-	-	1	0.86 (0.52-1.42)	0.563791	0.994872	-	-	-	-	-	-
	methylsuccinate	15745	HMDB01844	10349	C08645	C[C@@H](CC(O)=O)C(O)=O	Amino Acids	Leucine, Isoleucine and Valine Metabolism	Primary	Inverse variance weighted (random effects)/ Wald ratio	-	-	-	-	-	-	-	-	3	1.04 (0.9-1.19)	0.607064	0.994872	-	-	-	-	-	-
	methylsuccinate	15745	HMDB01844	10349	C08645	C[C@@H](CC(O)=O)C(O)=O	Amino Acids	Leucine, Isoleucine and Valine Metabolism	Sensitivity	Inverse variance weighted (fixed effects)	-	-	-	-	-	-	-	-	3	1.04 (0.9-1.19)	0.607064	-	-	-	-	-	-	-
	methylsuccinate	15745	HMDB01844	10349	C08645	C[C@@H](CC(O)=O)C(O)=O	Amino Acids	Leucine, Isoleucine and Valine Metabolism	Sensitivity	Inverse variance weighted (multiplicative random effects)	-	-	-	-	-	-	-	-	3	1.04 (1.02-1.06)	0.000579573	-	-	-	-	-	-	-
	methylsuccinate	15745	HMDB01844	10349	C08645	C[C@@H](CC(O)=O)C(O)=O	Amino Acids	Leucine, Isoleucine and Valine Metabolism	Sensitivity	MR Egger	-	-	-	-	-	-	-	-	3	1.05 (0.76-1.45)	0.803522	-	-	-	-	-	-	-
	methylsuccinate	15745	HMDB01844	10349	C08645	C[C@@H](CC(O)=O)C(O)=O	Amino Acids	Leucine, Isoleucine and Valine Metabolism	Sensitivity	Weighted median	-	-	-	-	-	-	-	-	3	1.04 (0.89-1.2)	0.637205	-	-	-	-	-	-	-
	methylsuccinate	15745	HMDB01844	10349	C08645	C[C@@H](CC(O)=O)C(O)=O	Amino Acids	Leucine, Isoleucine and Valine Metabolism	Sensitivity	Weighted mode	-	-	-	-	-	-	-	-	3	1.04 (0.89-1.21)	0.695113	-	-	-	-	-	-	-
	myristate (14:0)	1365	HMDB00806	11005	C06424	CCCCCCCCCCCCCC(O)=O	Lipids	Long Chain Fatty Acid	Primary	Inverse variance weighted (random effects)/ Wald ratio	-	-	-	-	-	-	-	-	1	1.12 (0.69-1.82)	0.644096	0.994872	-	-	-	-	-	-
	myristoleate (14:1n5)	32418	HMDB02000	5281119	C08322	CCCC\C=C/CCCCCCCC(O)=O	Lipids	Long Chain Fatty Acid	Primary	Inverse variance weighted (random effects)/ Wald ratio	2	1.04 (0.93-1.15)	0.502626	0.863348	-	-	-	-	2	0.85 (0.64-1.12)	0.242558	0.787777	2	1.01 (0.92-1.12)	0.826718	0.939606	43.4089	0.183746
	myristoleate (14:1n5)	32418	HMDB02000	5281119	C08322	CCCC\C=C/CCCCCCCC(O)=O	Lipids	Long Chain Fatty Acid	Sensitivity	Inverse variance weighted (fixed effects)	2	1.04 (0.93-1.15)	0.502626	-	-	-	-	-	2	0.85 (0.64-1.12)	0.242558	-	-	-	-	-	-	-
	myristoleate (14:1n5)	32418	HMDB02000	5281119	C08322	CCCC\C=C/CCCCCCCC(O)=O	Lipids	Long Chain Fatty Acid	Sensitivity	Inverse variance weighted (multiplicative random effects)	2	1.04 (0.96-1.12)	0.378986	-	-	-	-	-	2	0.85 (0.83-0.86)	1.51e-123	-	-	-	-	-	-	-
	myristoleoylcarnitine (C14:1)*	48182	HMDB0240588	90659872	-	CCCC\C=C/CCCCCCCC(=O)O[C@H](CC(O)=O)C[N+](C)(C)C	Lipids	Fatty Acid Metabolism (Acyl Carnitine)	Primary	Inverse variance weighted (random effects)/ Wald ratio	-	-	-	-	-	-	-	-	3	1.2 (0.87-1.65)	0.268328	0.840648	-	-	-	-	-	-
	myristoleoylcarnitine (C14:1)*	48182	HMDB0240588	90659872	-	CCCC\C=C/CCCCCCCC(=O)O[C@H](CC(O)=O)C[N+](C)(C)C	Lipids	Fatty Acid Metabolism (Acyl Carnitine)	Sensitivity	Inverse variance weighted (fixed effects)	-	-	-	-	-	-	-	-	3	1.2 (0.87-1.65)	0.268328	-	-	-	-	-	-	-
	myristoleoylcarnitine (C14:1)*	48182	HMDB0240588	90659872	-	CCCC\C=C/CCCCCCCC(=O)O[C@H](CC(O)=O)C[N+](C)(C)C	Lipids	Fatty Acid Metabolism (Acyl Carnitine)	Sensitivity	Inverse variance weighted (multiplicative random effects)	-	-	-	-	-	-	-	-	3	1.2 (1.13-1.27)	1.11e-10	-	-	-	-	-	-	-
	myristoleoylcarnitine (C14:1)*	48182	HMDB0240588	90659872	-	CCCC\C=C/CCCCCCCC(=O)O[C@H](CC(O)=O)C[N+](C)(C)C	Lipids	Fatty Acid Metabolism (Acyl Carnitine)	Sensitivity	MR Egger	-	-	-	-	-	-	-	-	3	1.04 (0.32-3.45)	0.955094	-	-	-	-	-	-	-
	myristoleoylcarnitine (C14:1)*	48182	HMDB0240588	90659872	-	CCCC\C=C/CCCCCCCC(=O)O[C@H](CC(O)=O)C[N+](C)(C)C	Lipids	Fatty Acid Metabolism (Acyl Carnitine)	Sensitivity	Weighted median	-	-	-	-	-	-	-	-	3	1.2 (0.82-1.77)	0.351101	-	-	-	-	-	-	-
	myristoleoylcarnitine (C14:1)*	48182	HMDB0240588	90659872	-	CCCC\C=C/CCCCCCCC(=O)O[C@H](CC(O)=O)C[N+](C)(C)C	Lipids	Fatty Acid Metabolism (Acyl Carnitine)	Sensitivity	Weighted mode	-	-	-	-	-	-	-	-	3	1.21 (0.8-1.83)	0.469537	-	-	-	-	-	-	-
	myristoyl dihydrosphingomyelin (d18:0/14:0)*	57365	HMDB12085	44260138	C00550	[H][C@@](COP([O-])(=O)OCC[N+](C)(C)C)(NC(=O)CCCCCCCCCCCCC)[C@H](O)CCCCCCCCCCCCCCC	Lipids	Sphingolipid Metabolism	Primary	Inverse variance weighted (random effects)/ Wald ratio	-	-	-	-	-	-	-	-	1	1 (0.77-1.29)	0.970945	0.999026	-	-	-	-	-	-
	nicotinamide N-oxide	-	HMDB02730	72661	-	NC(=O)C1=C[N+]([O-])=CC=C1	Cofactors and Vitamins	Nicotinate and Nicotinamide Metabolism	Primary	Inverse variance weighted (random effects)/ Wald ratio	-	-	-	-	-	-	-	-	1	0.86 (0.55-1.34)	0.492623	0.987241	-	-	-	-	-	-
	o-cresol sulfate	36845	-	11615528	-	-	Xenobiotics	Benzoate Metabolism	Primary	Inverse variance weighted (random effects)/ Wald ratio	-	-	-	-	-	-	-	-	2	0.78 (0.53-1.14)	0.198955	0.710262	-	-	-	-	-	-
	o-cresol sulfate	36845	-	11615528	-	-	Xenobiotics	Benzoate Metabolism	Sensitivity	Inverse variance weighted (fixed effects)	-	-	-	-	-	-	-	-	2	0.78 (0.53-1.14)	0.198955	-	-	-	-	-	-	-
	o-cresol sulfate	36845	-	11615528	-	-	Xenobiotics	Benzoate Metabolism	Sensitivity	Inverse variance weighted (multiplicative random effects)	-	-	-	-	-	-	-	-	2	0.78 (0.7-0.87)	1.04e-05	-	-	-	-	-	-	-
	octadecanedioate	36754	HMDB00782	70095		OC(=O)CCCCCCCCCCCCCCCCC(O)=O	Lipids	Fatty Acid, Dicarboxylate	Primary	Inverse variance weighted (random effects)/ Wald ratio	1	1.19 (1.07-1.32)	0.00171447	0.112298	1	1.02 (0.97-1.07)	0.50089	0.84396	3	0.98 (0.81-1.18)	0.817839	0.994872	3	1.04 (1-1.08)	0.0739124	0.276644	72.006	0.0280941
	octadecanedioate	36754	HMDB00782	70095		OC(=O)CCCCCCCCCCCCCCCCC(O)=O	Lipids	Fatty Acid, Dicarboxylate	Sensitivity	Inverse variance weighted (fixed effects)	-	-	-	-	-	-	-	-	3	0.98 (0.81-1.18)	0.817839	-	-	-	-	-	-	-
	octadecanedioate	36754	HMDB00782	70095		OC(=O)CCCCCCCCCCCCCCCCC(O)=O	Lipids	Fatty Acid, Dicarboxylate	Sensitivity	Inverse variance weighted (multiplicative random effects)	-	-	-	-	-	-	-	-	3	0.98 (0.93-1.03)	0.382026	-	-	-	-	-	-	-
	octadecanedioate	36754	HMDB00782	70095		OC(=O)CCCCCCCCCCCCCCCCC(O)=O	Lipids	Fatty Acid, Dicarboxylate	Sensitivity	MR Egger	-	-	-	-	-	-	-	-	3	1.25 (0.3-5.26)	0.813975	-	-	-	-	-	-	-
	octadecanedioate	36754	HMDB00782	70095		OC(=O)CCCCCCCCCCCCCCCCC(O)=O	Lipids	Fatty Acid, Dicarboxylate	Sensitivity	Weighted median	-	-	-	-	-	-	-	-	3	0.98 (0.79-1.22)	0.865754	-	-	-	-	-	-	-
	octadecanedioate	36754	HMDB00782	70095		OC(=O)CCCCCCCCCCCCCCCCC(O)=O	Lipids	Fatty Acid, Dicarboxylate	Sensitivity	Weighted mode	-	-	-	-	-	-	-	-	3	0.99 (0.77-1.27)	0.932736	-	-	-	-	-	-	-
	octanoylcarnitine (C8)	33936	HMDB00791	123701	C02838	CCCCCCCC(=O)O[C@H](CC(O)=O)C[N+](C)(C)C	Lipids	Fatty Acid Metabolism (Acyl Carnitine)	Primary	Inverse variance weighted (random effects)/ Wald ratio	3	0.97 (0.91-1.03)	0.315285	0.863252	2	0.99 (0.97-1.02)	0.521658	0.845067	4	1.07 (0.94-1.21)	0.313233	0.888518	3	0.99 (0.97-1.01)	0.44133	0.78929	0	0.397901
	octanoylcarnitine (C8)	33936	HMDB00791	123701	C02838	CCCCCCCC(=O)O[C@H](CC(O)=O)C[N+](C)(C)C	Lipids	Fatty Acid Metabolism (Acyl Carnitine)	Sensitivity	Inverse variance weighted (fixed effects)	3	0.97 (0.91-1.03)	0.315285	-	2	0.99 (0.97-1.02)	0.502412	-	4	1.07 (0.94-1.21)	0.313233	-	-	-	-	-	-	-
	octanoylcarnitine (C8)	33936	HMDB00791	123701	C02838	CCCCCCCC(=O)O[C@H](CC(O)=O)C[N+](C)(C)C	Lipids	Fatty Acid Metabolism (Acyl Carnitine)	Sensitivity	Inverse variance weighted (multiplicative random effects)	3	0.97 (0.94-1)	0.0610132	-	2	0.99 (0.97-1.02)	0.521658	-	4	1.07 (0.94-1.21)	0.29576	-	-	-	-	-	-	-
	octanoylcarnitine (C8)	33936	HMDB00791	123701	C02838	CCCCCCCC(=O)O[C@H](CC(O)=O)C[N+](C)(C)C	Lipids	Fatty Acid Metabolism (Acyl Carnitine)	Sensitivity	MR Egger	3	0.88 (0.47-1.62)	0.747618	-	-	-	-	-	4	0.89 (0.34-2.33)	0.834191	-	-	-	-	-	-	-
	octanoylcarnitine (C8)	33936	HMDB00791	123701	C02838	CCCCCCCC(=O)O[C@H](CC(O)=O)C[N+](C)(C)C	Lipids	Fatty Acid Metabolism (Acyl Carnitine)	Sensitivity	Weighted median	3	0.98 (0.91-1.05)	0.548458	-	-	-	-	-	4	1.03 (0.89-1.19)	0.665372	-	-	-	-	-	-	-
	octanoylcarnitine (C8)	33936	HMDB00791	123701	C02838	CCCCCCCC(=O)O[C@H](CC(O)=O)C[N+](C)(C)C	Lipids	Fatty Acid Metabolism (Acyl Carnitine)	Sensitivity	Weighted mode	3	0.99 (0.9-1.08)	0.814567	-	-	-	-	-	4	1.02 (0.88-1.19)	0.793988	-	-	-	-	-	-	-
	oleate (18:1n9)	1359	HMDB00207	445639	C00712	CCCCCCCC\C=C/CCCCCCCC(O)=O	Lipids	Long Chain Fatty Acid	Primary	Inverse variance weighted (random effects)/ Wald ratio	1	1.03 (0.9-1.18)	0.672696	0.878415	-	-	-	-	-	-	-	-	-	-	-	-	-	-
	oleate/vaccenate (18:1)	52285	-	-	-	-	Lipids	Long Chain Fatty Acid	Primary	Inverse variance weighted (random effects)/ Wald ratio	-	-	-	-	-	-	-	-	1	1.13 (0.67-1.89)	0.644232	0.994872	-	-	-	-	-	-
	oleoyl ethanolamide	38102	HMDB02088	5283454	-	CCCCCCCC\C=C/CCCCCCCC(=O)NCCO	Lipids	Endocannabinoid	Primary	Inverse variance weighted (random effects)/ Wald ratio	-	-	-	-	-	-	-	-	6	0.98 (0.88-1.09)	0.755132	0.994872	-	-	-	-	-	-
	oleoyl ethanolamide	38102	HMDB02088	5283454	-	CCCCCCCC\C=C/CCCCCCCC(=O)NCCO	Lipids	Endocannabinoid	Sensitivity	Inverse variance weighted (fixed effects)	-	-	-	-	-	-	-	-	6	0.98 (0.88-1.09)	0.755132	-	-	-	-	-	-	-
	oleoyl ethanolamide	38102	HMDB02088	5283454	-	CCCCCCCC\C=C/CCCCCCCC(=O)NCCO	Lipids	Endocannabinoid	Sensitivity	Inverse variance weighted (multiplicative random effects)	-	-	-	-	-	-	-	-	6	0.98 (0.93-1.04)	0.56286	-	-	-	-	-	-	-
	oleoyl ethanolamide	38102	HMDB02088	5283454	-	CCCCCCCC\C=C/CCCCCCCC(=O)NCCO	Lipids	Endocannabinoid	Sensitivity	MR Egger	-	-	-	-	-	-	-	-	6	1.02 (0.8-1.3)	0.891667	-	-	-	-	-	-	-
	oleoyl ethanolamide	38102	HMDB02088	5283454	-	CCCCCCCC\C=C/CCCCCCCC(=O)NCCO	Lipids	Endocannabinoid	Sensitivity	Weighted median	-	-	-	-	-	-	-	-	6	1 (0.89-1.12)	0.952664	-	-	-	-	-	-	-
	oleoyl ethanolamide	38102	HMDB02088	5283454	-	CCCCCCCC\C=C/CCCCCCCC(=O)NCCO	Lipids	Endocannabinoid	Sensitivity	Weighted mode	-	-	-	-	-	-	-	-	6	1 (0.89-1.12)	0.970747	-	-	-	-	-	-	-
	oleoyl-arachidonoyl-glycerol (18:1/20:4) [1]*	54960	HMDB07228	9543786	C00165	[H][C@](CO)(COC(=O)CCCCCCC\C=C/CCCCCCCC)OC(=O)CCC\C=C/C\C=C/C\C=C/C\C=C/CCCCC	Lipids	Diacylglycerol	Primary	Inverse variance weighted (random effects)/ Wald ratio	-	-	-	-	-	-	-	-	22	1.15 (1.08-1.24)	6.22e-05	0.00162047	-	-	-	-	-	-
	oleoyl-arachidonoyl-glycerol (18:1/20:4) [1]*	54960	HMDB07228	9543786	C00165	[H][C@](CO)(COC(=O)CCCCCCC\C=C/CCCCCCCC)OC(=O)CCC\C=C/C\C=C/C\C=C/C\C=C/CCCCC	Lipids	Diacylglycerol	Sensitivity	Inverse variance weighted (fixed effects)	-	-	-	-	-	-	-	-	22	1.15 (1.08-1.24)	6.22e-05	-	-	-	-	-	-	-
	oleoyl-arachidonoyl-glycerol (18:1/20:4) [1]*	54960	HMDB07228	9543786	C00165	[H][C@](CO)(COC(=O)CCCCCCC\C=C/CCCCCCCC)OC(=O)CCC\C=C/C\C=C/C\C=C/C\C=C/CCCCC	Lipids	Diacylglycerol	Sensitivity	Inverse variance weighted (multiplicative random effects)	-	-	-	-	-	-	-	-	22	1.15 (1.08-1.24)	4.01e-05	-	-	-	-	-	-	-
	oleoyl-arachidonoyl-glycerol (18:1/20:4) [1]*	54960	HMDB07228	9543786	C00165	[H][C@](CO)(COC(=O)CCCCCCC\C=C/CCCCCCCC)OC(=O)CCC\C=C/C\C=C/C\C=C/C\C=C/CCCCC	Lipids	Diacylglycerol	Sensitivity	MR Egger	-	-	-	-	-	-	-	-	22	1.02 (0.76-1.37)	0.911936	-	-	-	-	-	-	-
	oleoyl-arachidonoyl-glycerol (18:1/20:4) [1]*	54960	HMDB07228	9543786	C00165	[H][C@](CO)(COC(=O)CCCCCCC\C=C/CCCCCCCC)OC(=O)CCC\C=C/C\C=C/C\C=C/C\C=C/CCCCC	Lipids	Diacylglycerol	Sensitivity	Weighted median	-	-	-	-	-	-	-	-	22	1.14 (1.03-1.27)	0.0134399	-	-	-	-	-	-	-
	oleoyl-arachidonoyl-glycerol (18:1/20:4) [1]*	54960	HMDB07228	9543786	C00165	[H][C@](CO)(COC(=O)CCCCCCC\C=C/CCCCCCCC)OC(=O)CCC\C=C/C\C=C/C\C=C/C\C=C/CCCCC	Lipids	Diacylglycerol	Sensitivity	Weighted mode	-	-	-	-	-	-	-	-	22	1.15 (1-1.32)	0.0618135	-	-	-	-	-	-	-
	oleoyl-arachidonoyl-glycerol (18:1/20:4) [2]*	54961	HMDB07228	-	-	-	Lipids	Diacylglycerol	Primary	Inverse variance weighted (random effects)/ Wald ratio	-	-	-	-	-	-	-	-	14	1.22 (1.12-1.32)	2.66e-06	0.0001197	-	-	-	-	-	-
	oleoyl-arachidonoyl-glycerol (18:1/20:4) [2]*	54961	HMDB07228	-	-	-	Lipids	Diacylglycerol	Sensitivity	Inverse variance weighted (fixed effects)	-	-	-	-	-	-	-	-	14	1.22 (1.12-1.32)	2.66e-06	-	-	-	-	-	-	-
	oleoyl-arachidonoyl-glycerol (18:1/20:4) [2]*	54961	HMDB07228	-	-	-	Lipids	Diacylglycerol	Sensitivity	Inverse variance weighted (multiplicative random effects)	-	-	-	-	-	-	-	-	14	1.22 (1.14-1.3)	2.85e-08	-	-	-	-	-	-	-
	oleoyl-arachidonoyl-glycerol (18:1/20:4) [2]*	54961	HMDB07228	-	-	-	Lipids	Diacylglycerol	Sensitivity	MR Egger	-	-	-	-	-	-	-	-	14	1.14 (0.78-1.68)	0.506365	-	-	-	-	-	-	-
	oleoyl-arachidonoyl-glycerol (18:1/20:4) [2]*	54961	HMDB07228	-	-	-	Lipids	Diacylglycerol	Sensitivity	Weighted median	-	-	-	-	-	-	-	-	14	1.16 (1.04-1.29)	0.00693187	-	-	-	-	-	-	-
	oleoyl-arachidonoyl-glycerol (18:1/20:4) [2]*	54961	HMDB07228	-	-	-	Lipids	Diacylglycerol	Sensitivity	Weighted mode	-	-	-	-	-	-	-	-	14	1.15 (1-1.32)	0.0635613	-	-	-	-	-	-	-
	oleoyl-linoleoyl-glycerol (18:1/18:2) [1]	46798	HMDB07219	9543722	C00165	CCCCCCCC\C=C/CCCCCCCC(=O)OC[C@H](CO)OC(=O)CCCCCCC\C=C/C\C=C/CCCCC	Lipids	Diacylglycerol	Primary	Inverse variance weighted (random effects)/ Wald ratio	-	-	-	-	-	-	-	-	3	1.15 (0.83-1.58)	0.403829	0.987241	-	-	-	-	-	-
	oleoyl-linoleoyl-glycerol (18:1/18:2) [1]	46798	HMDB07219	9543722	C00165	CCCCCCCC\C=C/CCCCCCCC(=O)OC[C@H](CO)OC(=O)CCCCCCC\C=C/C\C=C/CCCCC	Lipids	Diacylglycerol	Sensitivity	Inverse variance weighted (fixed effects)	-	-	-	-	-	-	-	-	3	1.15 (0.96-1.38)	0.142033	-	-	-	-	-	-	-
	oleoyl-linoleoyl-glycerol (18:1/18:2) [1]	46798	HMDB07219	9543722	C00165	CCCCCCCC\C=C/CCCCCCCC(=O)OC[C@H](CO)OC(=O)CCCCCCC\C=C/C\C=C/CCCCC	Lipids	Diacylglycerol	Sensitivity	Inverse variance weighted (multiplicative random effects)	-	-	-	-	-	-	-	-	3	1.15 (0.83-1.58)	0.403829	-	-	-	-	-	-	-
	oleoyl-linoleoyl-glycerol (18:1/18:2) [1]	46798	HMDB07219	9543722	C00165	CCCCCCCC\C=C/CCCCCCCC(=O)OC[C@H](CO)OC(=O)CCCCCCC\C=C/C\C=C/CCCCC	Lipids	Diacylglycerol	Sensitivity	MR Egger	-	-	-	-	-	-	-	-	3	0.61 (0.2-1.91)	0.553813	-	-	-	-	-	-	-
	oleoyl-linoleoyl-glycerol (18:1/18:2) [1]	46798	HMDB07219	9543722	C00165	CCCCCCCC\C=C/CCCCCCCC(=O)OC[C@H](CO)OC(=O)CCCCCCC\C=C/C\C=C/CCCCC	Lipids	Diacylglycerol	Sensitivity	Weighted median	-	-	-	-	-	-	-	-	3	1.14 (0.93-1.4)	0.212512	-	-	-	-	-	-	-
[truncated: 351 more rows]

## Sheet: ST2
	Supplementary Table 2: Genetic instruments for metabolites significantly associated with prostate cancer risk in population-specific analyses. R² indicates the proportion of exposure variance explained by each SNP, calculated as 2*Beta^2*EAF*(1-EAF)/[2*Beta^2*EAF*(1-EAF)+ SE^2*2*N*EAF*(1-EAF)]. EAF: effect allele frequency, SE: standard error, N: sample size of metabolite GWAS. The F statistic wa…
[truncated: 1,399 more rows]

[truncated: 12 more sheets: ST3, ST4, ST5, ST6, ST7, ST8, ST9, ST10, ST11, S12, ST13, ST14]
