# Supplementary material for: Cross-population metabolome-wide Mendelian randomization study of prostate cancer risk
Source: Research Square preprint supplement (doi:10.21203/rs.3.rs-9708129/v1), 2026-05-31
Supplement: Supplementary file 2 [file cbb188fe9dfb281b69c0d46b.docx]

**STROBE-MR checklist of recommended items to address in reports of Mendelian randomization studies**12

| **Item No.** | **Section** | **Checklist item** | **Page No.** | **Relevant text from manuscript** |
| --- | --- | --- | --- | --- |
| 1 | **TITLE and ABSTRACT** | Indicate Mendelian randomization (MR) as the study’s design in the title and/or the abstract if that is a main purpose of the study | Pages 1,3 | “Cross-population metabolome-wide Mendelian randomization study of prostate cancer risk”  “We conducted a metabolome-wide two-sample Mendelian randomization (MR) of PCa risk in African (AFR) and European (EUR) genetic ancestry and Hispanic (HIS) ethnicity populations” |
|  | **INTRODUCTION** |  |  |  |
| 2 | **Background** | Explain the scientific background and rationale for the reported study. What is the exposure? Is a potential causal relationship between exposure and outcome plausible? Justify why MR is a helpful method to address the study question | Pages 6 -7 | “However, many PCa metabolite epidemiological findings have not been consistently replicated, which could be partially due to heterogeneity in confounding factors, metabolite levels, metabolite platforms, and statistical methodology across studies. Further, few findings have been consistently reported for risk of overall as opposed to advanced or lethal PCa.19 This suggests the potential for reverse causation, whereby metabolite associations could be a consequence of the development of PCa rather than metabolites impacting future risk of PCa and disease etiology.20 An improved understanding of metabolites associated with overall PCa risk may highlight the biological mechanisms underpinning tumorigenesis, furthering our understanding of cancer biology and informing therapeutic development.  Causal inference approaches, such as Mendelian randomization (MR), can address bias due to reverse causation and residual confounding, while uncovering novel etiologic factors provided specific assumptions are met. MR is particularly useful in metabolomic investigations, where reverse causation could be substantial. In addition, many metabolites are highly heritable (typically ranging from ~20-50%), enabling the development of genetic instruments utilized in MR investigations.22 Several PCa metabolite MR studies have been performed to date and have suggested risk-decreasing associations with phospholipids and risk-increasing associations with nucleotides involved in pyrimidine and purine metabolism,23-34 complementing observational findings.21,35 However, previous PCa metabolomic MR studies were often restricted to small metabolite panels and performed in European descent individuals, limiting the potential for discovery and determining whether findings are generalizable” |
| 3 | **Objectives** | State specific objectives clearly, including pre-specified causal hypotheses (if any). State that MR is a method that, under specific assumptions, intends to estimate causal effects | Pages 6 -7 | “Causal inference approaches, such as Mendelian randomization (MR), can address bias due to reverse causation and residual confounding, while uncovering novel etiologic factors provided specific assumptions are met.”  “To address these gaps in knowledge and investigate the metabolomic underpinnings of PCa risk, we conducted a comprehensive exploratory cross-population two-sample MR study across African (AFR) and European (EUR) genetic ancestry and Hispanic (HIS) ethnicity populations using serum metabolomic genome-wide association study (GWAS) summary statistics, based on a high throughput metabolomics panel, and the largest cross-population PCa GWAS to date. We also performed extensive sensitivity analyses to evaluate MR assumption violations and further investigated metabolites with strong evidence of associations with PCa risk, leveraging colocalization, multivariate MR analyses, and public drug and dietary databases to better understand the potential clinical and public health implications of our findings and guide future research.” |
|  | **METHODS** |  |  |  |
| 4 | **Study design and data sources** | Present key elements of the study design early in the article. Consider including a table listing sources of data for all phases of the study. For each data source contributing to the analysis, describe the following: |  |  |
|  | a) | Setting: Describe the study design and the underlying population, if possible. Describe the setting, locations, and relevant dates, including periods of recruitment, exposure, follow-up, and data collection, when available. | Pages 9  Figure 1 | “Initially established in 1985 to identify risk factors for subclinical atherosclerosis, ARIC is a community surveillance and prospective US-based cohort study that recruited 15,792 middle-aged African American and White adults in four locations (Forsyth County, NC; Jackon, MS; suburban Minneapolis, MN; and Washington County, MD).41 HCHS/SOL is community-based US cohort which recruited 16,415 Hispanic/Latino adults from four cities (Bronx, NY; Chicago, IL; Miami, FL; and San Deigo CA) between 2008-2011 with the goal of understanding chronic disease incidence, prevalence, and risk factors.42”  “In ARIC, metabolomic profiling was conducted in two batches in 2010 and 2014, while in SOL, metabolomic profiling was conducted more recently in 2017” |
|  | b) | Participants: Give the eligibility criteria, and the sources and methods of selection of participants. Report the sample size, and whether any power or sample size calculations were carried out prior to the main analysis | Pages 7,9,11  Figure 1 | “Metabolomic GWAS summary statistics for 1,740 AFR and 1,500 EUR genetic ancestry individuals were obtained from the Atherosclerosis Risk in Community (ARIC) study, while summary statistics for 3,848 HIS individuals were obtained from the Hispanic Community Health Study/Study of Latinos (HCHS/SOL).39,40”  “In ARIC, AFR and EUR populations were initially defined based on self-report. Individuals who were +/-4 standard deviations outside ancestry-specific genetic clusters defined with principal components were subsequently excluded”  “Population-specific PCa GWAS summary statistics were obtained from the most recent GWAS meta-analysis from the Prostate Cancer Association Group to Investigate Cancer Associated Alterations in the Genome (PRACTICAL) Consortium, which included 19,391/61,608 AFR ancestry, 122,188/604,640 EUR ancestry, and 3,931/26,405 HIS cases/controls.47” |
|  | c) | Describe measurement, quality control and selection of genetic variants | Pages 11-12  Figure 1 | “We developed genetic instruments separately in each population for each metabolite and limited to independent (r2<0.2) autosomal single-nucleotide polymorphisms (SNPs; indels were not included) associated with each metabolite at the genome-wide significance level (P<5x10-8), excluding SNPs that were poorly imputed (info score<0.60), rare (MAF≤0.01), or not present in the PCa GWAS summary statistics. MAF were used to infer the leading strand during exposure and outcome data harmonization when possible. Ambiguous palindromic SNPs were removed and replaced with the non-palindromic SNP in the linkage disequilibrium (LD) block with the next smallest p-value. For computational efficiency, LD pruning was performed separately in each population using LD estimates from TOP-LD, which included a subset of 1,335 AFR ancestry and 13,160 EUR ancestry individuals from TOPMed.45,49 As TOP-LD lacks HIS populations, LD pruning for HIS instruments was performed using LD estimated in EUR and then further pruned based on LD in AFR ancestry populations. In sensitivity analyses, statistically significant findings were further investigated with a more stringent LD threshold of r2<0.01 (rather than r2<0.2). Since TOP-LD only provides LD estimates for pairs of variants with r2≥0.2, sensitivity analyses of significant findings used LD calculated in TOPMed freeze 12 with 10,495 AFR ancestry, 10,864 EUR ancestry, and 8,100 HIS individuals.” |
|  | d) | For each exposure, outcome, and other relevant variables, describe methods of assessment and diagnostic criteria for diseases | Pages 9-10 | “Metabolites in both cohorts were quantified via untargeted metabolomic profiling on fasting serum samples collected at baseline through Ultrahigh Performance Liquid Chromatography-Tandem Mass Spectroscopy at Metabolon, Inc. (Durham, NC). In ARIC, metabolomic profiling was conducted in two batches in 2010 and 2014, while in SOL, metabolomic profiling was conducted more recently in 2017, leading to a larger number of quantified metabolites. In each study population, metabolites missing in >80% of samples were excluded. Remaining missing metabolite values were assumed to be below the limit of detection (LOD) and imputed to the lowest LOD observed for each metabolite.” |
|  | e) | Provide details of ethics committee approval and participant informed consent, if relevant | Page 37 | **Ethics approval and consent to participate** section |
| 5 | **Assumptions** | Explicitly state the three core IV assumptions for the main analysis (relevance, independence and exclusion restriction) as well assumptions for any additional or sensitivity analysis | Page 12 | “…sensitivity analyses to evaluate violations of MR assumptions, including: i) instruments are robustly associated with the outcome (relevance assumption), ii) instruments are not associated with confounders (independence assumption), and iii) instruments only associate with the outcome via the exposure (exclusion restriction assumption).” |
| 6 | **Statistical methods: main analysis** | Describe statistical methods and statistics used |  |  |
|  | a) | Describe how quantitative variables were handled in the analyses (i.e., scale, units, model) | Page 10 | “Each metabolite was standardized with an inverse normalization transformation in each population separately. In linear regression models, each metabolite was then regressed on for sex, age at sample draw, batch, and center, with HCHS/SOL additionally adjusting for the six aforementioned populations. In sensitivity analyses, we additionally adjusted metabolite GWAS for body mass index (BMI) and smoking status (however, these additional adjustments could not be applied to the previously generated PCa GWAS summary statistics). All residuals were inverse normalized and rank-based normalized with the Blom transformation and used for subsequent analyses.” |
|  | b) | Describe how genetic variants were handled in the analyses and, if applicable, how their weights were selected | Page 11 | “We developed genetic instruments separately in each population for each metabolite and limited to independent (r2<0.2) autosomal single-nucleotide polymorphisms (SNPs; indels were not included) associated with each metabolite at the genome-wide significance level (P<5x10-8), excluding SNPs that were poorly imputed (info score<0.60), rare (MAF≤0.01), or not present in the PCa GWAS summary statistics. MAF were used to infer the leading strand during exposure and outcome data harmonization when possible. Ambiguous palindromic SNPs were removed and replaced with the non-palindromic SNP in the linkage disequilibrium (LD) block with the next smallest p-value” |
|  | c) | Describe the MR estimator (e.g. two-stage least squares, Wald ratio) and related statistics. Detail the included covariates and, in case of two-sample MR, whether the same covariate set was used for adjustment in the two samples | Pages 10-13 | “GWAS were performed using linear regression models, with each metabolite as the outcome and each genetic variant as the predictor, adjusting for the first ten principal components to account for population stratification.”  “Population-specific PCa GWAS summary statistics were obtained from the most recent GWAS meta-analysis from the Prostate Cancer Association Group to Investigate Cancer Associated Alterations in the Genome (PRACTICAL) Consortium, which included 19,391/61,608 AFR ancestry, 122,188/604,640 EUR ancestry, and 3,931/26,405 HIS cases/controls.47 GWAS were performed using logistic regression models adjusted for age, sub-study (when applicable), and up to 10 principal components to account for population stratification.”  “MR analyses were performed via the TwoSample R package,50 with inverse variance weighted (IVW) random effect results presented as primary analyses; Wald ratios were presented when an instrument included only one SNP”  “In brief, these MR methods combine the effect sizes of included SNPs (obtained from GWAS summary data) into a single instrumental variable, with IVW approaches weighting each SNP by the inverse of the variance of their effect and then meta-analyzing effects across all SNPs while sensitivity analyses use approaches with different relaxations of MR assumptions” |
|  | d) | Explain how missing data were addressed | Pages 9-10 | “In each study population, metabolites missing in >80% of samples were excluded. Remaining missing metabolite values were assumed to be below the limit of detection (LOD) and imputed to the lowest LOD observed for each metabolite” |
|  | e) | If applicable, indicate how multiple testing was addressed | Page 13 | “Statistical significance for exploratory metabolome-wide analyses was defined as false discovery rate (FDR)<0.10 to account for multiple testing.” |
| 7 | **Assessment of assumptions** | Describe any methods or prior knowledge used to assess the assumptions or justify their validity | Pages 12, 15, 16 | “R2 estimates and F statistics were calculated for each SNP. All variants included in the metabolite instruments had an F statistic >10.”  “IVW fixed, IVW random multiplicative, weighted median, weighted mode, MR Egger, and MR PRESSO (when instruments contained ≥10 SNPs) results were presented as sensitivity analyses”  “We investigated whether our findings for metabolites with strong MR evidence could be impacted by pleiotropy, given the strong correlation structure of metabolomic data, by: 1) performing IVW multivariate MR (MVMR), which accounts for shared genetic variants across metabolites that could reflect correlation,62-64 based on metabolite instruments using the r2<0.01 LD threshold, 2) evaluating whether genetic variants in metabolite instruments were most predictive of the respective vs another metabolite, similar to a previous investigation,65 and 3) identifying traits previously associated with variants in our metabolite instruments. The latter was accomplished by searching the GWAS catalog using LDtrait66 from the LDlinkR R package for variants included in metabolite instruments or correlated with instruments (r2≥0.95 within a 500kb window based on matched populations from the 1000 Genomes Project Phase 3).67 We also evaluated correlations between metabolite instrument variants and 439 autosomal variants from a previously developed multi-ancestry PCa polygenic risk score (PRS)68 using LDmatrix from the LDlinkR R package.”  “We investigated whether circulating levels of the identified metabolites were previously associated with cancers or other traits by searching the Exposome Explorer using metabolite names and all reported synonyms from HMDB. Searches were conducted on April 30, 2025.”  “We investigated whether the identified metabolites could be drug modifiable by searching the DrugBank pharmaco-metabolomics database70 using metabolite names and synonyms from HMDB. We investigated whether the identified metabolites have been previously quantified in foods and potentially modifiable by diet by searching FooDB using HMDB IDs and searching MetaboFood using metabolite chemical formulas and names. Searches were conducted on April 30, 2025.” |
| 8 | **Sensitivity analyses and additional analyses** | Describe any sensitivity analyses or additional analyses performed (e.g. comparison of effect estimates from different approaches, independent replication, bias analytic techniques, validation of instruments, simulations) | Pages 10-15 | “In sensitivity analyses, we additionally adjusted metabolite GWAS for body mass index (BMI) and smoking status (however, these additional adjustments could not be applied to the previously generated PCa GWAS summary statistics).”  “IVW fixed, IVW random multiplicative, weighted median, weighted mode, MR Egger, and MR PRESSO51 (when instruments contained ≥10 SNPs) results were presented as sensitivity analyses”  “For metabolites with a genetic instrument in ≥2 populations, we reported cross-population MR results, using fixed effect models to meta-analyze population-specific IVW random effects and evaluating heterogeneity with Cochran’s Q statistic in the meta R package. Random effects meta-analyses were additionally conducted for metabolites with i) evidence of heterogeneity (Q-test Phet<0.05) and ii) MR instruments in all three populations.”  “Colocalization was used to investigate the presence of shared causal variants between a metabolite and PCa risk, using population-specific GWAS summary statistics …. Regions were defined as +/-100kb windows on either side of each evaluated SNP. Colocalization analyses were conducted via the coloc R package with three default variant level prior probabilities: P1: 1e−4 (probability each variant is causally associated with the metabolite only); P2: 1e−4 (probability each variant is causally associated with PCa risk only); and P12: 1e−5 (probability each variant is causally associated with both the metabolite and PCa).57 Evidence of colocalization was defined as posterior probability of H4 (PP.H4)>70% or PP.H4/(PP.H3+PP.H4)>70%.”  “We investigated whether our findings for metabolites with strong MR evidence could be impacted by pleiotropy, given the strong correlation structure of metabolomic data, by: 1) performing IVW multivariate MR (MVMR), which accounts for shared genetic variants across metabolites that could reflect correlation,62-64 based on metabolite instruments using the r2<0.01 LD threshold, 2) evaluating whether genetic variants in metabolite instruments were most predictive of the respective vs another metabolite, similar to a previous investigation,65 and 3) identifying traits previously associated with variants in our metabolite instruments…” |
| 9 | **Software and pre-registration** |  |  |  |
|  | a) | Name statistical software and package(s), including version and settings used | Pages 11-13,15, | “Genomic coordinates were lifted over to build GRch38/hg38 with the liftOver R package”  “Statistical analyses were performed in R (version 4.4.0).”  “MR analyses were performed via the TwoSample R package”  “IVW random effects and evaluating heterogeneity with Cochran’s Q statistic in the meta R package.”  “Enrichment analyses were performed for super- and sub-pathways (defined by Metabolon; **Table S1**) with a one-sided Fisher’s exact hypergeometric test using the bc3net R package.”  “..was accomplished by searching the GWAS catalog using LDtrait from the LDlinkR R package”  “Colocalization analyses were conducted via the coloc R package”  “MVMR was conducted utilizing the MVMR R package” |
|  | b) | State whether the study protocol and details were pre-registered (as well as when and where) | NA |  |
|  | **RESULTS** |  |  |  |
| 10 | **Descriptive data** |  |  |  |
|  | a) | Report the numbers of individuals at each stage of included studies and reasons for exclusion. Consider use of a flow diagram | Figure 1 |  |
|  | b) | Report summary statistics for phenotypic exposure(s), outcome(s), and other relevant variables (e.g. means, SDs, proportions) | Pages 10 -11 | “In linear regression models, each metabolite was then regressed on for sex, age at sample draw, batch, and center, with HCHS/SOL additionally adjusting for the six aforementioned populations. In sensitivity analyses, we additionally adjusted metabolite GWAS for body mass index (BMI) and smoking status (however, these additional adjustments could not be applied to the previously generated PCa GWAS summary statistics). All residuals were inverse normalized and rank-based normalized with the Blom transformation and used for subsequent analyses. Genotype data were generated on the Affymetrix Array 6.0 for ARIC and the Illumina Multi-Ethnic Genotyping Array (MEGA) for HCHS/SOL and imputed to the TOPMed-r2 reference panel.(45) GWAS were performed using linear regression models, with each metabolite as the outcome and each genetic variant as the predictor, adjusting for the first ten principal components to account for population stratification. In ARIC, analyses were performed separately in AFR and EUR ancestry populations. In both ARIC and HCHS/SOL, analyses were performed in SUGEN to account for relatedness.(46) After excluding rare variants (minor allele frequency (MAF) ≤0.01), two metabolites in the EUR ancestry data had a genomic inflation factor (λ)≥1.10 and were removed from subsequent analyses.”  “Population-specific PCa GWAS summary statistics were obtained from the most recent GWAS meta-analysis from the Prostate Cancer Association Group to Investigate Cancer Associated Alterations in the Genome (PRACTICAL) Consortium, which included 19,391/61,608 AFR ancestry, 122,188/604,640 EUR ancestry, and 3,931/26,405 HIS cases/controls over 21 years of age” |
|  | c) | If the data sources include meta-analyses of previous studies, provide the assessments of heterogeneity across these studies | NA |  |
|  | d) | For two-sample MR:  i.  Provide justification of the similarity of the genetic variant-exposure associations between the exposure and outcome samples  ii.  Provide information on the number of individuals who overlap between the exposure and outcome studies | Pages 11-12 | “There was no overlap between metabolite and PCa GWAS study participants.”  “In each population MR analyses were performed via the TwoSample R package, with inverse variance weighted (IVW) random effect results presented as primary analyses” |
| 11 | **Main results** |  |  |  |
|  | a) | Report the associations between genetic variant and exposure, and between genetic variant and outcome, preferably on an interpretable scale | Pages 12,17, 38    Supplementary Tables 2-3 | “All variants included in the metabolite instruments had an F statistic >10.”  “We evaluated 732 associations between 549 serum metabolites (146 amino acids, 20 carbohydrates, 13 cofactors and vitamins, 9 energy metabolites, 258 lipids, 26 nucleotides, 31 peptides, and 46 xenobiotics) and PCa risk, including 131, 106, and 495 metabolites tested in AFR, EUR, and HIS, respectively”  **Availability of data and materials** section |
|  | b) | Report MR estimates of the relationship between exposure and outcome, and the measures of uncertainty from the MR analysis, on an interpretable scale, such as odds ratio or relative risk per SD difference | Page 17  Figure 3  Supplementary Tables 1 | “In AFR, one of the 131 tested metabolites, hexadecanedioate (a fatty acid dicarboxylate), was significantly associated with PCa risk (OR=1.10, 95% CI=1.05-1.16, Padj=0.02)”  “In EUR, seven of the 106 tested metabolites (two amino acids, one carbohydrate, two lipids, one nucleotide, and one xenobiotic) were significantly associated with PCa risk, with the strongest association observed for the amino acid 3-methoxytyrosine (OR=1.48, 95% CI=1.28-1.71, Padj=8.7x10-6)”  “Among metabolites without evidence of MR assumption violations in HIS, the strongest association was observed for the xenobiotic propyl 4-hydroxybenzoate sulphate (OR=1.23, 95% CI=1.17-1.34, Padj=3.75x10-9)” |
|  | c) | If relevant, consider translating estimates of relative risk into absolute risk for a meaningful time period | NA |  |
|  | d) | Consider plots to visualize results (e.g. forest plot, scatterplot of associations between genetic variants and outcome versus between genetic variants and exposure) | Figures 2-3 |  |
| 12 | **Assessment of assumptions** |  |  |  |
|  | a) | Report the assessment of the validity of the assumptions | Pages 17  Supplementary Tables 2-3 | “While no evidence of MR assumption violations was identified in AFR and EUR populations, 17 of the identified metabolite associations in HIS displayed evidence of MR assumption violations” |
|  | b) | Report any additional statistics (e.g., assessments of heterogeneity across genetic variants, such as *I2*, Q statistic or E-value) | Pages 20,22  Supplementary Table 1, 5 | “Across all metabolites meta-analyzed, we found evidence of heterogeneity (Q-test P-value<0.05) across populations for 22 metabolites in fixed effect meta-analyses (**Table S1**), including 12 of the 21 metabolites significantly associated with PCa risk in cross-population MR. Of the 22 metabolites with evidence of heterogeneity, 11 had genetic instruments in all three populations and could therefore be meta-analyzed using random effects meta-analyses, including 8 of the 21 metabolites significantly associated in cross-population analyses. Of these eight initially significant metabolites, two remained significant using random effects models (4-acetamidobutanoate and 1-linoleoyl-GPE (18:2); **Table S5**).” |
| 13 | **Sensitivity analyses and additional analyses** |  |  |  |
|  | a) | Report any sensitivity analyses to assess the robustness of the main results to violations of the assumptions | Pages 17,22  Supplementary Figures 1, 10  Supplementary Table 1 | “While no evidence of MR assumption violations was identified in AFR and EUR populations, 17 of the identified metabolite associations in HIS displayed evidence of MR assumption violations”  “In evaluating the strength of evidence across association, replication, and sensitivity analyses (criteria described in the **Methods**), 14 metabolites had strong MR evidence” |
|  | b) | Report results from other sensitivity analyses or additional analyses | Pages 17,22,23,25,26,29  Figures 4-6  Supplementary Figures 3-9  Supplementary Tables 3-6, 8-14 | “In HIS, 40 of the 495 tested metabolites (five amino acids, two carbohydrates, one cofactor and vitamin, 29 lipids, one peptide, and two xenobiotics) were significantly associated with PCa risk. These metabolites were enriched for the lipid super pathway (Padj=0.007) and the polyunsaturated fatty acids (PUFAs) (n3 and n6) (Padj=0.001) and phosphatidylcholine (Padj=0.005) sub-pathways.”  “…results from sensitivity analyses using metabolite GWAS summary statistics additionally adjusted for BMI and current smoking status were highly correlated with our primary results (beta r=0.97, P-value r=0.96 **Figure S5**). In additional sensitivity analyses, MR instruments were developed for these 50 metabolites using a more stringent LD threshold of r2<0.01 in all populations with an available metabolite instrument. Of the initially identified significant associations, 1/1, 7/7,7/40, and 17/21 associations remained significant in AFR, EUR, HIS, and cross-population analyses, respectively, using the stringent LD threshold (**Figure 5**, **Table S6**).”  “Based on the PP.H4>70% criteria, evidence of colocalization was observed for one of the three SNPs (rs28864441) in the AFR hexadecanedioate instrument (PP.H4=0.759) (**Figure S4** and **Table S8**). Based on the PP.H4/(PP.H3 + PP.H4)>70% criteria, loci in six additional metabolites displayed evidence of colocalization: 2-hydroxystearate, 5-methyluridine, and isovalerylcarnitine (C5) based on EUR instruments, erythritol and ribitol based on HIS instruments, and mannose based on both EUR and HIS instruments.”  “In MVMR analyses, of the metabolites initially associated in population-specific MR analyses, hexadecanedioate in AFR, 3-methoxytyrosine and mannose in EUR, and mannose and ribitol in HIS were associated with PCa risk (**Figure S5**).”  “In LDtrait, 18 of the 22 variants included in the 14 metabolite instruments were previously associated with an average of 87, 168, and 346 traits in AFR, EUR, and HIS populations, respectively”  “Using Exposome Explorer, we found that two of the 14 metabolites were previously associated with cancer outcomes…”  “Using DrugBank, we found that three of the 14 metabolites were modifiable by drugs…”  “Using FooDB, four metabolites were previously quantified in food..” |
|  | c) | Report any assessment of direction of causal relationship (e.g., bidirectional MR) | NA |  |
|  | d) | When relevant, report and compare with estimates from non-MR analyses | NA |  |
|  | e) | Consider additional plots to visualize results (e.g., leave-one-out analyses) | Figures 3-5  Supplementary Figures 3, 5-10 |  |
|  | **DISCUSSION** |  |  |  |
| 14 | **Key results** | Summarize key results with reference to study objectives | Pages 29-30 | “We conducted a comprehensive and exploratory large-scale cross-population untargeted metabolomics-PCa MR, leading to the identification of 50 metabolites demonstrating significant associations with PCa risk, 14 of which had strong evidence after considering sensitivity analyses and evidence across populations. Of these, five were potentially novel biomarkers of overall PCa risk and seven validated previous findings. In extensive follow-up analyses evaluating potential environmental modifiers of these 14 metabolites, at least three were targets for existing drugs and six have been quantified in or associated with dietary factors, suggesting that these PCa risk metabolites may be modifiable. These findings provide insights into potentially causal mechanisms leading to the development of PCa and could have implications for prevention and screening strategies.” |
| 15 | **Limitations** | Discuss limitations of the study, taking into account the validity of the IV assumptions, other sources of potential bias, and imprecision. Discuss both direction and magnitude of any potential bias and any efforts to address them | Pages 35-36 | “Nonetheless, this study also has limitations. Firstly, although all included cohorts utilized the Metabolon platform, metabolomics profiling was conducted at different timepoints with different platform versions in each population, reducing the comparability and availability of metabolites across populations and our ability to investigate cross-population effects. HCHS/SOL had the largest number of metabolites measured and sample size for the metabolite GWAS, resulting in more associated metabolites identified in the HIS population. Secondly, to maximize statistical power, metabolite GWAS were conducted across sexes; although metabolite GWAS were adjusted for sex, residual differences in metabolism between sexes could impact results. Thirdly, some metabolite instruments only contained one SNP, meaning it was not possible to fully assess pleiotropy. Finally, as this investigation was based on serum samples, we may not have captured plasma-specific or tissue-specific associations between metabolites and cancer risk” |
| 16 | **Interpretation** |  |  |  |
|  | a) | Meaning: Give a cautious overall interpretation of results in the context of their limitations and in comparison with other studies | Pages 29,30,36  Figure 2  Supplementary Tables 7, 14 | “We conducted a comprehensive and exploratory large-scale cross-population untargeted metabolomics-PCa MR, leading to the identification of 50 metabolites demonstrating significant associations with PCa risk, 14 of which had strong evidence after considering sensitivity analyses and evidence across populations. Of these, five were potentially novel biomarkers of overall PCa risk and seven validated previous findings. In extensive follow-up analyses evaluating potential environmental modifiers of these 14 metabolites, at least three were targets for existing drugs and six have been quantified in or associated with dietary factors, suggesting that these PCa risk metabolites may be modifiable. These findings provide insights into potentially causal mechanisms leading to the development of PCa and could have implications for prevention and screening strategies.”  “This large-scale MR of pre-diagnostic serum metabolomics highlights the role of numerous metabolites, including lipids, amino acids, and nucleotides, in PCa risk across diverse population groups. Many of these metabolites are biologically relevant to PCa pathogenesis, potentially offering novel mechanistic insights, and some have been previously associated with cancer risk, including prostate, endometrial, ovarian, and breast cancer while others are potentially novel” |
|  | b) | Mechanism: Discuss underlying biological mechanisms that could drive a potential causal relationship between the investigated exposure and the outcome, and whether the gene-environment equivalence assumption is reasonable. Use causal language carefully, clarifying that IV estimates may provide causal effects only under certain assumptions | Pages 30-34 | “PUFAs have long been associated with numerous health outcomes, including cancer, and fatty acid dysregulation is known to help facilitate the migration and proliferation of cancer cells…these findings could reflect historical dietary selection pressures that led to population differences in PUFA metabolism, different dietary sources of omega-3 PUFAs, or different screening practices. It has been suggested that positive associations between omega-3 PUFAs and PCa risk could reflect healthier individuals being more likely to undergo screening and receive a PCa diagnosis. While our causal inference approach makes it less likely for findings to be impacted by such screening selection bias, it will be important for future studies to evaluate PUFAs across global populations where screening practices vary and with consideration of lethal PCa risk. Further, many of the PUFAs we identified displayed evidence of pleiotropy, which was expected given the versatile role of PUFAs in human health and their link to the highly pleiotropic *FADS* locus. Our findings may reflect vertical pleiotropy, where instruments are associated with multiple traits in the same biological pathway (not violating MR assumptions); however, given the potential for horizontal pleiotropy, where instruments are associated with traits in different pathways (violating MR assumptions), our PUFA findings should be interpreted with caution.”  “Hexadecanedioate, a product of fatty acid β-oxidation, is a suspected marker of impaired mitochondrial β-oxidation and dysregulated lipid metabolism. Dicarboxylate fatty acids (quantified as tetradecanedioate and hexadecanedioate) have also been shown to be significantly increased in tumors resistant to androgen deprivation therapy compared to non-resistant tumors.”  “This investigation also highlighted associations between two monohydroxylated fatty acids: 3-hydroxydecanoate, previously associated with increased PCa risk in a European ancestry MR study, and a novel positive association between 2-hydroxystearate and PCa risk not identified in previous observational or MR studies. Supporting this finding, we identified evidence of colocalization for rs7529794 in the 2-hydroxystearate instrument, located in the *MACF1* gene—a cytoskeleton regulator that regulates key cellular processes, including cellular migration and proliferation. Although no studies to date have investigated the role of *MACF1* in PCa risk, *MACF1* upregulation has been reported in breast, lung, and brain cancers. Hydroxylation of fatty acids can considerably alter the physiological properties of fatty acids, positioning them as key components in membrane structure and cellular signaling. Although investigations into the role of hydroxylated fatty acids in cancer are limited, increased expression of glycosphingolipids containing high levels of hydroxylated fatty acids have been identified in a range of tumor types.”  “Lysophospholipids are lipid synthesis intermediates, signaling mediators and immune response modulators that have been associated with cancer development and the tumor microenvironment, and differences in 1-linoleoyl-GPE (18:2) concentrations between the peripheral (where ~70% of PCa is diagnosed) and transitional anatomical glandular zones in the prostate have been reported in non-cancerous tissue. Furthermore, lysophospholipids can be converted to lysophosphatidic acid (LPA), which in turn can bind to LPA receptors, the expression of which has been shown to impact PCa development and progression.”  “Erythritol is a sugar alcohol involved in nucleic acid and nicotinamide adenine dinucleotide phosphate (NADPH) synthesis that is produced from glucose via the pentose phosphate pathway (PPP), a recognized target pathway in cancer prevention”  “Like erythritol, ribitol is a sugar alcohol and PPP intermediate. It has previously been shown to enhance the ability of the cancer therapeutic JQ1 to inhibit cellular proliferation and migration of certain breast cancer cell lines.” |
|  | c) | Clinical relevance: Discuss whether the results have clinical or public policy relevance, and to what extent they inform effect sizes of possible interventions | Pages 29,30,35,36 | “Of these, five were potentially novel biomarkers of overall PCa risk and seven validated previous findings. In extensive follow-up analyses evaluating potential environmental modifiers of these 14 metabolites, at least three were targets for existing drugs and six have been quantified in or associated with dietary factors, suggesting that these PCa risk metabolites may be modifiable. These findings provide insights into potentially causal mechanisms leading to the development of PCa and could have implications for prevention and screening strategies.”  “We conducted comprehensive sensitivity analyses to assess MR assumption violations and follow-up analyses to highlight potential environmental modifiers of identified metabolites, providing additional biological and clinical context to our findings”  “In evaluating the clinical utility of these metabolites as PCa biomarkers across populations, future work should assess the role of these metabolites in high-risk and lethal PCa, particularly given previous observations of metabolite associations varying by PCa aggressiveness” |
| 17 | **Generalizability** | "Discuss the generalizability of the study results (a) to other populations, (b) across other exposure periods/timings, and (c) across other levels of exposure | Page 36 | “Moreover, although this is the only diverse PCa metabolomics MR investigation to date, findings may not be generalizable across all populations meaning additional studies are warranted in other populations.” |
|  | **OTHER INFORMATION** |  |  |  |
| 18 | **Funding** | Describe sources of funding and the role of funders in the present study and, if applicable, sources of funding for the databases and original study or studies on which the present study is based | Page 39 | **Funding** section  **Supplementary information** |
| 19 | **Data and data sharing** | Provide the data used to perform all analyses or report where and how the data can be accessed, and reference these sources in the article. Provide the statistical code needed to reproduce the results in the article, or report whether the code is publicly accessible and if so, where | Pages 38 | **Availability** **of data and materials** section |
| 20 | **Conflicts of Interest** | All authors should declare all potential conflicts of interest | Pages 38- 39 | **Competing interests** section |

This checklist is copyrighted by the Equator Network under the Creative Commons Attribution 3.0 Unported (CC BY 3.0) license.

1. Skrivankova VW, Richmond RC, Woolf BAR, Yarmolinsky J, Davies NM, Swanson SA, et al. Strengthening the Reporting of Observational Studies in Epidemiology using Mendelian Randomization (STROBE-MR) Statement. JAMA. 2021;under review.

2. Skrivankova VW, Richmond RC, Woolf BAR, Davies NM, Swanson SA, VanderWeele TJ, et al. Strengthening the Reporting of Observational Studies in Epidemiology using Mendelian Randomisation (STROBE-MR): Explanation and Elaboration. BMJ. 2021;375:n2233.
